# Supplementary material for: Gene family innovation, conservation and loss on the animal stem lineage
Source: eLife journal article supplement (doi:10.7554/elife.34226), 2018-05-31
Supplement: supp [file elife-34226-supp-v1.zip]

Archive with 36 entries (36 files):
- elife_poa_e34226_Figure_4_figure_supplement_2.pdf
- elife_poa_e34226_Supplementary_File_3.xlsx
- elife_poa_e34226_Supplementary_File_6.xlsx
- elife_poa_e34226_Supplementary_File_5.xlsx
- elife_poa_e34226_Figure_2_figure_supplement_4.pdf
- elife_poa_e34226_Supplementary_File_2.xlsx
- elife_poa_e34226_Figure_2_figure_supplement_6.pdf
- elife_poa_e34226_Figure_4_figure_supplement_1.pdf
- elife_poa_e34226_Figure_2_figure_supplement_9.pdf
- elife_poa_e34226_Figure_2_figure_supplement_10.pdf
- elife_poa_e34226_Figure_2_figure_supplement_8.pdf
- elife_poa_e34226_Figure_2_source_data_1.txt
- elife_poa_e34226_Supplementary_File_7.xlsx
- elife_poa_e34226_Figure_2_figure_supplement_2.pdf
- elife_poa_e34226_Figure_2_figure_supplement_1.pdf
- elife_poa_e34226_Figure_1_figure_supplement_3.pdf
- elife_poa_e34226_Figure_3_figure_supplement_1.pdf
- elife_poa_e34226_Supplementary_File_8.xlsx
- elife_poa_e34226_Supplementary_File_12.xlsx
- elife_poa_e34226_Supplementary_File_10.xlsx
- elife_poa_e34226_Supplementary_File_14.xlsx
- elife_poa_e34226_Figure_2_figure_supplement_5.pdf
- elife_poa_e34226_Transparent_Reporting_File.docx
- elife_poa_e34226_Figure_2_figure_supplement_11.pdf
- elife_poa_e34226_Figure_2_figure_supplement_7.pdf
- elife_poa_e34226_Figure_2_figure_supplement_3.pdf
- elife_poa_e34226_Figure_1_figure_supplement_1.pdf
- elife_poa_e34226_Figure_2_figure_supplement_12.pdf
- elife_poa_e34226_Figure_3_figure_supplement_2.pdf
- elife_poa_e34226_Supplementary_File_9.xlsx
- elife_poa_e34226_Supplementary_File_4.xlsx
- elife_poa_e34226_Figure_3_figure_supplement_3.pdf
- elife_poa_e34226_Supplementary_File_11.xlsx
- elife_poa_e34226_Figure_1_figure_supplement_2.pdf
- elife_poa_e34226_Supplementary_File_1.xlsx
- elife_poa_e34226_Supplementary_File_13.xlsx
