# Supplementary material for: Gene family innovation, conservation and loss on the animal stem lineage
Source: eLife journal article supplement (doi:10.7554/elife.34226), 2018-05-31
Supplement: supp [file elife-34226-supp-v1.zip › elife_poa_e34226_Figure_2_figure_supplement_6.pdf]

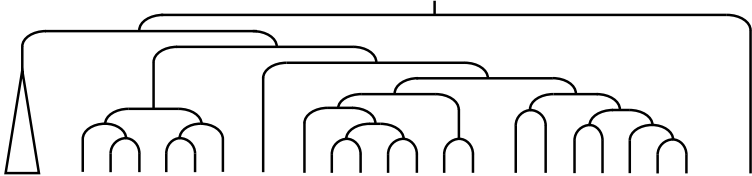

**Animals**

*S. diplocostata*  
*D. grandis*  
*D. costata*  
*H. nana*  
*A. spectabilis*  
*S. parva*  
*S. dolichothecata*  
*C. hollandica*  
*M. fluctuans*  
*S. helianthica*  
*S. punica*  
*S. macrocollata*  
*S. urceolata*  
*S. kvevrii*  
*M. brevicollis*  
*C. perplexa*  
*M. roanoka*  
*S. rosetta*  
*S. infusionum*  
*H. gracilis*  
*H. balthica*

**Choanoflagellates**

*C. owczarzaki*

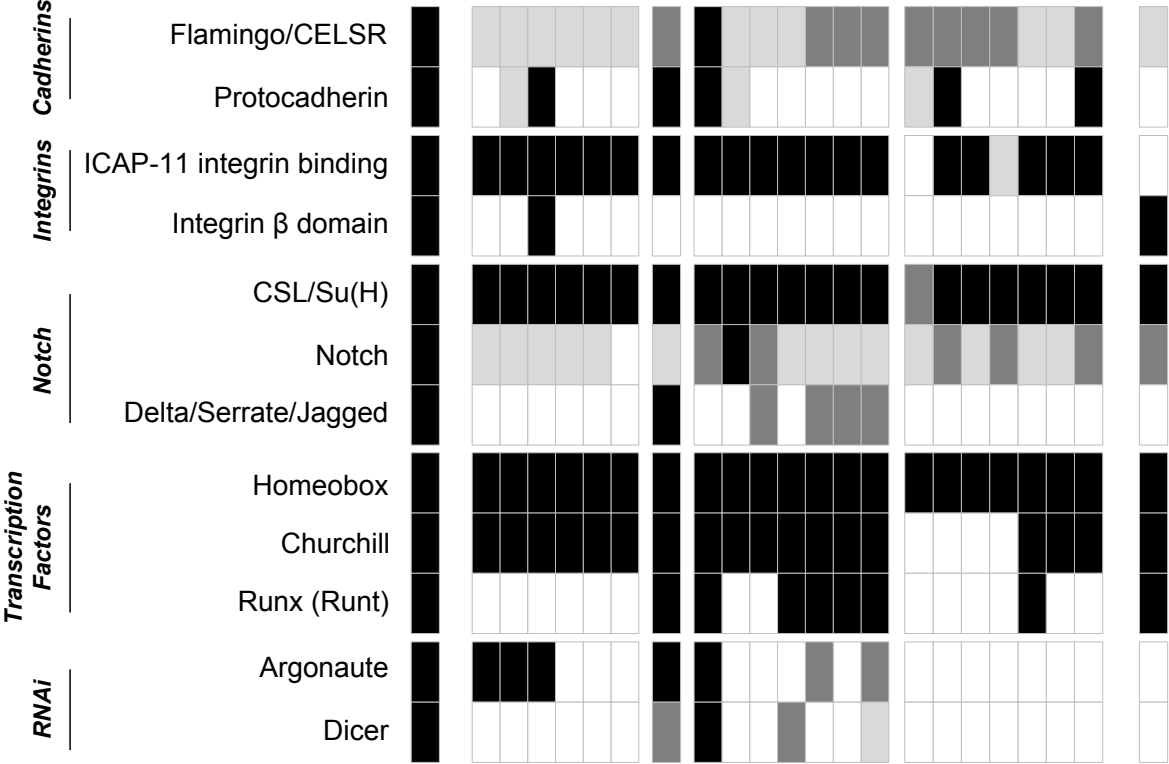

**Protein Domain Architecture**

Conserved

Not Detected
