# Supplementary material for: Gene family innovation, conservation and loss on the animal stem lineage
Source: eLife journal article supplement (doi:10.7554/elife.34226), 2018-05-31

Inside or Outside Gene Family

- Inside Gene Family

Outside Gene Family

Species Group

- Animal

Choanoflagellate

Other

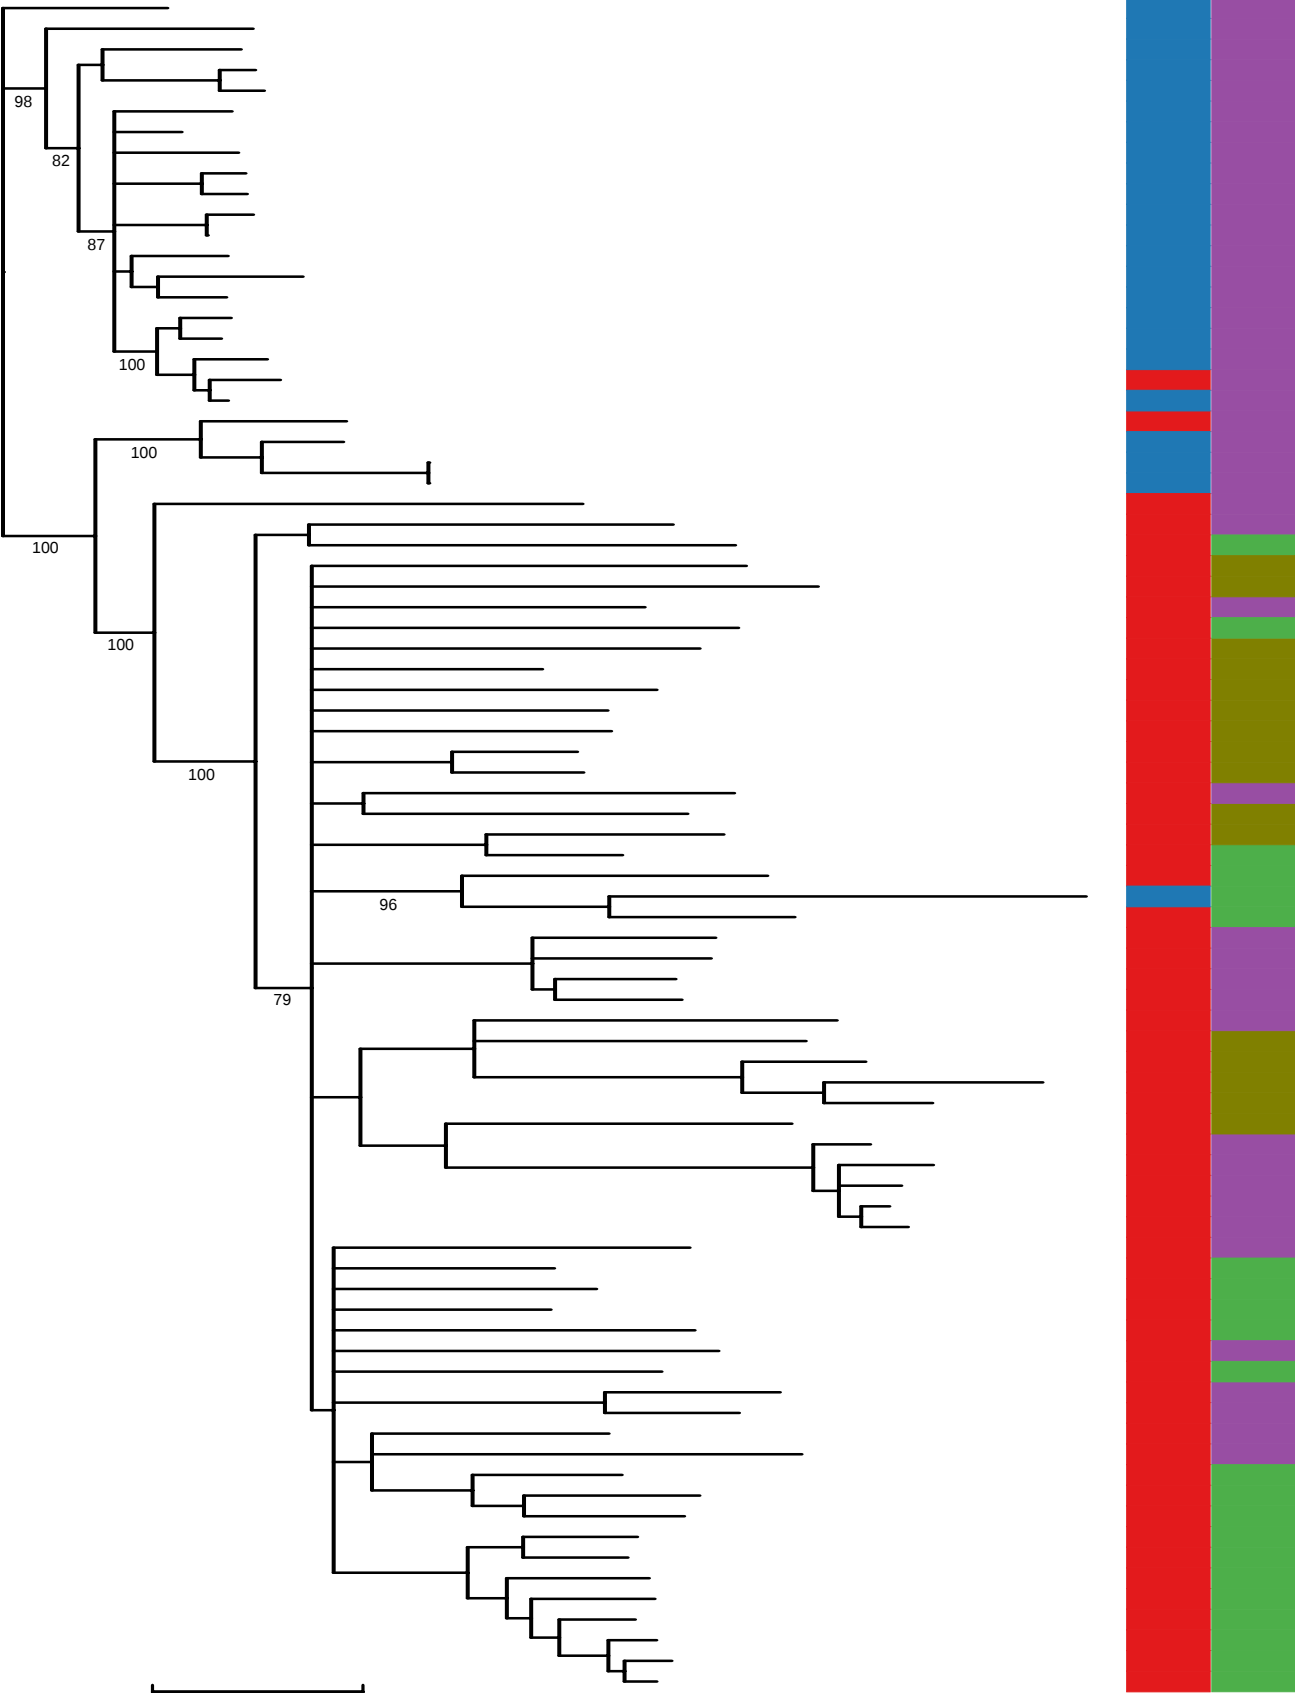

Supplement: supp [file elife-34226-supp-v1.zip › elife_poa_e34226_Figure_2_figure_supplement_10.pdf]
