# Supplementary material for: Gene family innovation, conservation and loss on the animal stem lineage
Source: eLife journal article supplement (doi:10.7554/elife.34226), 2018-05-31
Supplement: supp [file elife-34226-supp-v1.zip › elife_poa_e34226_Figure_2_source_data_1.txt]

<?xml version="1.0" encoding="UTF-8"?>
<phyloxml xmlns:xsi="http://www.w3.org/2001/XMLSchema-instance" xsi:schemaLocation="http://www.phyloxml.org http://www.phyloxml.org/1.10/phyloxml.xsd" xmlns="http://www.phyloxml.org">
<phylogeny rooted="false" rerootable="true">
  <name>actin</name>
  <clade>
    <clade>
      <branch_length>0.075608069</branch_length>
      <confidence type="unknown">99</confidence>
      <clade>
        <branch_length>0.122689005</branch_length>
        <confidence type="unknown">100</confidence>
        <clade>
          <name>34_Strongylocentrotus_purpuratus|47550920_3_4.6e-240</name>
          <branch_length>0.011735536</branch_length>
        </clade>
        <clade>
          <branch_length>0.006138078</branch_length>
          <confidence type="unknown">67</confidence>
          <clade>
            <name>34_Strongylocentrotus_purpuratus|390360421_2_2.9e-240</name>
            <branch_length>0.023437685</branch_length>
          </clade>
          <clade>
            <name>34_Strongylocentrotus_purpuratus|336455059_1_3.1e-241</name>
            <branch_length>0.010121921</branch_length>
          </clade>
        </clade>
      </clade>
      <clade>
        <branch_length>0.126080265</branch_length>
        <confidence type="unknown">83</confidence>
        <clade>
          <name>22_Oscarella_pearsei|comp35301_c1_seq2_3_9.4e-157</name>
          <branch_length>0.158712633</branch_length>
        </clade>
        <clade>
          <branch_length>0.055079264</branch_length>
          <confidence type="unknown">62</confidence>
          <clade>
            <name>22_Oscarella_pearsei|comp35272_c0_seq1_2_4.4e-159</name>
            <branch_length>0.52013757</branch_length>
          </clade>
          <clade>
            <name>22_Oscarella_pearsei|comp37161_c0_seq2_1_6.3e-228</name>
            <branch_length>0.052705894</branch_length>
          </clade>
        </clade>
      </clade>
      <clade>
        <branch_length>0.142694925</branch_length>
        <confidence type="unknown">70</confidence>
        <clade>
          <name>25_Mnemiopsis_leidyi|ML35935_3_2.6e-231</name>
          <branch_length>0.057750876</branch_length>
        </clade>
        <clade>
          <name>25_Mnemiopsis_leidyi|ML174735_2_4.5e-232</name>
          <branch_length>0.065749037</branch_length>
        </clade>
      </clade>
      <clade>
        <name>25_Mnemiopsis_leidyi|ML26358_1_2.6e-233</name>
        <branch_length>0.174252523</branch_length>
      </clade>
      <clade>
        <name>24_Amphimedon_queenslandica|Aqu1.226162_2_3.4e-105</name>
        <branch_length>1.541287464</branch_length>
      </clade>
      <clade>
        <branch_length>0.552145223</branch_length>
        <confidence type="unknown">100</confidence>
        <clade>
          <name>56_Guillardia_theta|95748_2_1.2e-166</name>
          <branch_length>0.312190873</branch_length>
        </clade>
        <clade>
          <name>56_Guillardia_theta|159011_3_1.3e-160</name>
          <branch_length>0.306683041</branch_length>
        </clade>
      </clade>
      <clade>
        <branch_length>0.118481161</branch_length>
        <confidence type="unknown">97</confidence>
        <clade>
          <name>41_Capitella_teleta|176468_1_2.3e-251</name>
          <branch_length>0.015600526</branch_length>
        </clade>
        <clade>
          <branch_length>0.028506324</branch_length>
          <confidence type="unknown">97</confidence>
          <clade>
            <name>41_Capitella_teleta|160805_2_1.3e-247</name>
            <branch_length>0.051748039</branch_length>
          </clade>
          <clade>
            <name>41_Capitella_teleta|158679_3_2e-247</name>
            <branch_length>0.038700829</branch_length>
          </clade>
        </clade>
      </clade>
      <clade>
        <branch_length>0.129003552</branch_length>
        <confidence type="unknown">94</confidence>
        <clade>
          <branch_length>0.041930538</branch_length>
          <confidence type="unknown">100</confidence>
          <clade>
            <name>36_Pristionchus_pacificus|PPA14164_2_2.2e-251</name>
            <branch_length>0.00376486</branch_length>
          </clade>
          <clade>
            <branch_length>7.76307E-4</branch_length>
            <confidence type="unknown">72</confidence>
            <clade>
              <name>36_Pristionchus_pacificus|PPA23459_1_8.9e-252</name>
              <branch_length>7.51888E-4</branch_length>
            </clade>
            <clade>
              <name>36_Pristionchus_pacificus|PPA09119_3_7.5e-216</name>
              <branch_length>0.065244891</branch_length>
            </clade>
          </clade>
        </clade>
        <clade>
          <branch_length>0.082559198</branch_length>
          <confidence type="unknown">99</confidence>
          <clade>
            <branch_length>1.844E-6</branch_length>
            <confidence type="unknown">96</confidence>
            <clade>
              <name>35_Caenorhabditis_elegans|M03F4.2b_1_1.8e-247</name>
              <branch_length>1.844E-6</branch_length>
            </clade>
            <clade>
              <name>35_Caenorhabditis_elegans|M03F4.2c_2_2.2e-247</name>
              <branch_length>0.005461776</branch_length>
            </clade>
          </clade>
          <clade>
            <name>35_Caenorhabditis_elegans|M03F4.2a_3_2.4e-247</name>
            <branch_length>1.844E-6</branch_length>
          </clade>
        </clade>
      </clade>
      <clade>
        <name>02_Acanthoeca_spectabilis|comp10976_c0_seq1_3_7.9e-171</name>
        <branch_length>0.767741511</branch_length>
      </clade>
      <clade>
        <name>16_Salpingoeca_dolichothecata|comp26491_c0_seq1_1_2.9e-179</name>
        <branch_length>0.242738312</branch_length>
      </clade>
      <clade>
        <name>11_Choanoeca_perplexa|comp12589_c1_seq1_1_1.8e-190</name>
        <branch_length>0.268752124</branch_length>
      </clade>
      <clade>
        <name>09_Salpingoeca_kvevrii|comp9933_c0_seq1_3_1.4e-142</name>
        <branch_length>1.074128565</branch_length>
      </clade>
      <clade>
        <Name>01_Diaphanoeca_grandis|comp32819_c0_seq8_3_2.9e-129</name>
        <branch_length>1.029585232</branch_length>
      </clade>
      <clade>
        <branch_length>0.24239662</branch_length>
        <confidence type="unknown">100</confidence>
        <clade>
          <name>13_Microstomoeca_roanoka|comp15624_c0_seq1_2_2.7e-257</name>
          <branch_length>1.844E-6</branch_length>
        </clade>
        <clade>
          <name>13_Microstomoeca_roanoka|comp15624_c0_seq2_1_2.5e-257</name>
          <branch_length>1.844E-6</branch_length>
        </clade>
      </clade>
      <clade>
        <branch_length>0.2198354</branch_length>
        <confidence type="unknown">64</confidence>
        <clade>
          <name>12_Salpingoeca_infusionum|comp14544_c0_seq3_1_3.8e-262</name>
          <branch_length>0.045220545</branch_length>
        </clade>
        <clade>
          <branch_length>0.0332412</branch_length>
          <confidence type="unknown">87</confidence>
          <clade>
            <name>15_Hartaetosiga_balthica|comp2182_c0_seq1_1_6.5e-253</name>
            <branch_length>0.073297347</branch_length>
          </clade>
          <clade>
            <name>05_Hartaetosiga_gracilis|comp11731_c0_seq1_1_1.3e-257</name>
            <branch_length>0.021874448</branch_length>
          </clade>
        </clade>
      </clade>
      <clade>
        <branch_length>0.208895026</branch_length>
        <confidence type="unknown">57</confidence>
        <clade>
          <branch_length>0.086830543</branch_length>
          <confidence type="unknown">79</confidence>
          <clade>
            <name>59_Thalassiosira_pseudonana|25772_1_4.2e-188</name>
            <branch_length>0.355208749</branch_length>
          </clade>
          <clade>
            <branch_length>0.069418687</branch_length>
            <confidence type="unknown">73</confidence>
            <clade>
              <name>58_Bigelowiella_natans|87880_1_7e-221</name>
              <branch_length>0.126431521</branch_length>
            </clade>
            <clade>
              <branch_length>0.036465268</branch_length>
              <confidence type="unknown">55</confidence>
              <clade>
                <name>58_Bigelowiella_natans|52823_3_7.7e-199</name>
                <branch_length>0.216215454</branch_length>
              </clade>
              <clade>
                <name>58_Bigelowiella_natans|48466_2_4.6e-207</name>
                <branch_length>0.159325346</branch_length>
              </clade>
            </clade>
          </clade>
        </clade>
        <clade>
          <name>56_Guillardia_theta|166684_1_8.7e-210</name>
          <branch_length>0.060283022</branch_length>
        </clade>
      </clade>
      <clade>
        <branch_length>0.22293617</branch_length>
        <confidence type="unknown">77</confidence>
        <clade>
          <name>48_Yarrowia_lipolytica|YALI0D08272g_1_1.2e-222</name>
          <branch_length>0.177843244</branch_length>
        </clade>
        <clade>
          <branch_length>0.074180414</branch_length>
          <confidence type="unknown">96</confidence>
          <clade>
            <name>44_Coprinopsis_cinerea|CC1G_13048T0_2_1.7e-188</name>
            <branch_length>0.342404646</branch_length>
          </clade>
          <clade>
            <name>44_Coprinopsis_cinerea|CC1G_08232T0_1_6.1e-225</name>
            <branch_length>0.082802012</branch_length>
          </clade>
        </clade>
      </clade>
      <clade>
        <branch_length>0.746796638</branch_length>
        <confidence type="unknown">100</confidence>
        <clade>
          <name>47_Homolaphlyctis_polyrhiza|hpol21668_2_0</name>
          <branch_length>1.844E-6</branch_length>
        </clade>
        <clade>
          <name>47_Homolaphlyctis_polyrhiza|hpol5284_1_0</name>
          <branch_length>1.844E-6</branch_length>
        </clade>
      </clade>
      <clade>
        <branch_length>0.586049748</branch_length>
        <confidence type="unknown">53</confidence>
        <clade>
          <branch_length>0.760604419</branch_length>
          <confidence type="unknown">100</confidence>
          <clade>
            <name>52_Chlamydomonas_reinhardtii|Cre16.g687500.t1.2_3_8.5e-106</name>
            <branch_length>0.980282977</branch_length>
          </clade>
          <clade>
            <branch_length>0.191073839</branch_length>
            <confidence type="unknown">88</confidence>
            <clade>
              <name>43_Capsaspora_owczarzaki|CAOG_03291T0_3_2.2e-150</name>
              <branch_length>0.249170157</branch_length>
            </clade>
            <clade>
              <branch_length>0.228699146</branch_length>
              <confidence type="unknown">85</confidence>
              <clade>
                <name>04_Salpingoeca_urceolata|comp20987_c0_seq1_2_1.7e-155</name>
                <branch_length>0.283540174</branch_length>
              </clade>
              <clade>
                <name>09_Salpingoeca_kvevrii|comp11462_c0_seq1_2_1.8e-156</name>
                <branch_length>0.143383144</branch_length>
              </clade>
            </clade>
            <clade>
              <branch_length>0.242887382</branch_length>
              <confidence type="unknown">87</confidence>
              <clade>
                <name>03_Salpingoeca_punica|comp14164_c0_seq1_2_2.1e-163</name>
                <branch_length>0.146716265</branch_length>
              </clade>
              <clade>
                <name>06_Salpingoeca_macrocollata|comp5617_c0_seq1_3_4.7e-159</name>
                <branch_length>0.154095243</branch_length>
              </clade>
            </clade>
            <clade>
              <branch_length>0.314452133</branch_length>
              <confidence type="unknown">93</confidence>
              <clade>
                <name>11_Choanoeca_perplexa|comp11683_c0_seq1_2_7.2e-139</name>
                <branch_length>0.290548193</branch_length>
              </clade>
              <clade>
                <name>20_Monosiga_brevicollis|35254_2_3.2e-160</name>
                <branch_length>0.176471624</branch_length>
              </clade>
            </clade>
            <clade>
              <branch_length>0.314418974</branch_length>
              <confidence type="unknown">76</confidence>
              <clade>
                <branch_length>0.063462421</branch_length>
                <confidence type="unknown">84</confidence>
                <clade>
                  <branch_length>0.177003792</branch_length>
                  <confidence type="unknown">100</confidence>
                  <clade>
                    <name>05_Hartaetosiga_gracilis|comp3964_c0_seq1_2_1.3e-142</name>
                    <branch_length>0.145916148</branch_length>
                  </clade>
                  <clade>
                    <name>15_Hartaetosiga_balthica|comp2242_c0_seq1_2_3e-131</name>
                    <branch_length>0.166927862</branch_length>
                  </clade>
                </clade>
                <clade>
                  <name>13_Microstomoeca_roanoka|comp10769_c0_seq1_3_7.3e-144</name>
                  <branch_length>0.261222931</branch_length>
                </clade>
              </clade>
              <clade>
                <name>12_Salpingoeca_infusionum|comp9793_c0_seq1_2_1.3e-147</name>
                <branch_length>0.23552711</branch_length>
              </clade>
            </clade>
            <clade>
              <branch_length>0.262770997</branch_length>
              <confidence type="unknown">74</confidence>
              <clade>
                <name>18_Salpingoeca_helianthica|comp9192_c0_seq1_3_9.3e-161</name>
                <branch_length>0.186437122</branch_length>
              </clade>
              <clade>
                <name>19_Mylnosiga_fluctuans|comp9318_c0_seq2_2_6e-166</name>
                <branch_length>0.183120433</branch_length>
              </clade>
            </clade>
            <clade>
              <branch_length>0.554026488</branch_length>
              <confidence type="unknown">100</confidence>
              <clade>
                <name>17_Codosiga_hollandica|comp56724_c0_seq2_3_7e-138</name>
                <branch_length>1.844E-6</branch_length>
              </clade>
              <clade>
                <name>17_Codosiga_hollandica|comp56724_c0_seq1_2_6.7e-138</name>
                <branch_length>1.844E-6</branch_length>
              </clade>
            </clade>
            <clade>
              <branch_length>0.357487338</branch_length>
              <confidence type="unknown">54</confidence>
              <clade>
                <name>10_Didymoeca_costata|comp17036_c0_seq1_3_3.9e-130</name>
                <branch_length>0.35022048</branch_length>
              </clade>
              <clade>
                <branch_length>0.082014034</branch_length>
                <confidence type="unknown">83</confidence>
                <clade>
                  <branch_length>0.227759971</branch_length>
                  <confidence type="unknown">100</confidence>
                  <clade>
                    <name>07_Stephanoeca_diplocostata_FR|comp14221_c0_seq1_2_3.1e-130</name>
                    <branch_length>0.002152239</branch_length>
                  </clade>
                  <clade>
                    <name>07_Stephanoeca_diplocostata_AU|comp13553_c0_seq1_2_1e-130</name>
                    <branch_length>1.844E-6</branch_length>
                  </clade>
                </clade>
                <clade>
                  <branch_length>0.192742877</branch_length>
                  <confidence type="unknown">100</confidence>
                  <clade>
                    <name>14_Savillea_parva|comp12590_c0_seq1_2_3.8e-134</name>
                    <branch_length>0.153270919</branch_length>
                  </clade>
                  <clade>
                    <name>08_Helgoeca_nana|comp11829_c0_seq1_2_3.7e-137</name>
                    <branch_length>0.163197865</branch_length>
                  </clade>
                </clade>
              </clade>
            </clade>
            <clade>
              <branch_length>0.576535167</branch_length>
              <confidence type="unknown">94</confidence>
              <clade>
                <name>26_Hydra_vulgaris|Hma2.206983_3_3.6e-95</name>
                <branch_length>0.391939227</branch_length>
              </clade>
              <clade>
                <name>24_Amphimedon_queenslandica|Aqu1.218364_1_9.5e-116</name>
                <branch_length>0.265996895</branch_length>
              </clade>
            </clade>
            <clade>
              <name>16_Salpingoeca_dolichothecata|comp14018_c0_seq1_2_7.5e-143</name>
              <branch_length>0.5794374</branch_length>
            </clade>
            <clade>
              <name>47_Homolaphlyctis_polyrhiza|hpol3195_3_2.2e-127</name>
              <branch_length>0.36554837</branch_length>
            </clade>
            <clade>
              <name>44_Coprinopsis_cinerea|CC1G_00749T0_3_4.5e-123</name>
              <branch_length>0.646998277</branch_length>
            </clade>
            <clade>
              <name>45_Rhizopus_oryzae|RO3G_00739T0_3_2.4e-107</name>
              <branch_length>0.772282894</branch_length>
            </clade>
            <clade>
              <name>46_Schizosaccharomyces_pombe|SPAC11H11.06.1_2_1.9e-84</name>
              <branch_length>1.090725367</branch_length>
            </clade>
            <clade>
              <name>48_Yarrowia_lipolytica|YALI0F15389g_2_7.1e-125</name>
              <branch_length>0.694165645</branch_length>
            </clade>
          </clade>
        </clade>
        <clade>
          <branch_length>0.323152048</branch_length>
          <confidence type="unknown">99</confidence>
          <clade>
            <name>46_Schizosaccharomyces_pombe|SPBC1347.12.1_3_2e-59</name>
            <branch_length>1.481632139</branch_length>
          </clade>
          <clade>
            <name>59_Thalassiosira_pseudonana|269504_2_5e-73</name>
            <branch_length>1.584959614</branch_length>
          </clade>
          <clade>
            <name>48_Yarrowia_lipolytica|YALI0E05335g_3_6.1e-100</name>
            <branch_length>1.021832888</branch_length>
          </clade>
          <clade>
            <branch_length>0.907580334</branch_length>
            <confidence type="unknown">100</confidence>
            <clade>
              <name>14_Savillea_parva|comp13175_c0_seq1_3_3.6e-104</name>
              <branch_length>0.213089778</branch_length>
            </clade>
            <clade>
              <name>08_Helgoeca_nana|comp28699_c0_seq1_3_2.8e-105</name>
              <branch_length>0.142978725</branch_length>
            </clade>
          </clade>
          <clade>
            <branch_length>0.40703749</branch_length>
            <confidence type="unknown">70</confidence>
            <clade>
              <branch_length>0.202974527</branch_length>
              <confidence type="unknown">97</confidence>
              <clade>
                <name>12_Salpingoeca_infusionum|comp12782_c0_seq1_3_2.5e-94</name>
                <branch_length>0.600887983</branch_length>
              </clade>
              <clade>
                <branch_length>0.337813379</branch_length>
                <confidence type="unknown">100</confidence>
                <clade>
                  <name>15_Hartaetosiga_balthica|comp9166_c0_seq2_3_2.2e-79</name>
                  <branch_length>0.336358275</branch_length>
                </clade>
                <clade>
                  <name>05_Hartaetosiga_gracilis|comp8477_c0_seq1_3_5.7e-90</name>
                  <branch_length>0.391160747</branch_length>
                </clade>
              </clade>
            </clade>
            <clade>
              <branch_length>0.184432975</branch_length>
              <confidence type="unknown">99</confidence>
              <clade>
                <name>20_Monosiga_brevicollis|35236_3_4.7e-108</name>
                <branch_length>0.372677938</branch_length>
              </clade>
              <clade>
                <name>11_Choanoeca_perplexa|comp13101_c0_seq1_3_5.2e-97</name>
                <branch_length>0.437666891</branch_length>
              </clade>
            </clade>
          </clade>
          <clade>
            <name>19_Mylnosiga_fluctuans|comp11307_c0_seq1_3_5.3e-132</name>
            <branch_length>0.719068322</branch_length>
          </clade>
          <clade>
            <name>03_Salpingoeca_punica|comp16581_c0_seq6_3_7.6e-116</name>
            <branch_length>0.932863922</branch_length>
          </clade>
          <clade>
            <name>16_Salpingoeca_dolichothecata|comp21562_c0_seq1_3_6.7e-100</name>
            <branch_length>1.00494709</branch_length>
          </clade>
        </clade>
      </clade>
      <clade>
        <branch_length>0.570210735</branch_length>
        <confidence type="unknown">100</confidence>
        <clade>
          <name>53_Chondrus_crispus|546315227_3_2.8e-159</name>
          <branch_length>0.435743472</branch_length>
        </clade>
        <clade>
          <branch_length>0.173854759</branch_length>
          <confidence type="unknown">100</confidence>
          <clade>
            <name>53_Chondrus_crispus|546320373_1_1.4e-184</name>
            <branch_length>0.002338971</branch_length>
          </clade>
          <clade>
            <name>53_Chondrus_crispus|495323_2_3e-184</name>
            <branch_length>0.001873884</branch_length>
          </clade>
        </clade>
      </clade>
      <clade>
        <branch_length>0.249991996</branch_length>
        <confidence type="unknown">100</confidence>
        <clade>
          <name>21_Salpingoeca_rosetta|PTSG_01553T0_1_3.1e-259</name>
          <branch_length>1.844E-6</branch_length>
        </clade>
        <clade>
          <branch_length>0.003143761</branch_length>
          <confidence type="unknown">64</confidence>
          <clade>
            <name>21_Salpingoeca_rosetta|PTSG_05705T0_2_1.3e-258</name>
            <branch_length>1.844E-6</branch_length>
          </clade>
          <clade>
            <name>21_Salpingoeca_rosetta|PTSG_02201T0_3_6.4e-258</name>
            <branch_length>0.006307814</branch_length>
          </clade>
        </clade>
      </clade>
      <clade>
        <branch_length>0.311402998</branch_length>
        <confidence type="unknown">70</confidence>
        <clade>
          <name>23_Ephydatia_muelleri|comp52383_c0_seq1_3_8.3e-164</name>
          <branch_length>0.510961017</branch_length>
        </clade>
        <clade>
          <name>23_Ephydatia_muelleri|comp65821_c1_seq4_2_3.1e-252</name>
          <branch_length>0.012389371</branch_length>
        </clade>
        <clade>
          <name>23_Ephydatia_muelleri|comp65697_c0_seq1_1_2.1e-252</name>
          <branch_length>0.013090278</branch_length>
        </clade>
      </clade>
      <clade>
        <name>19_Mylnosiga_fluctuans|comp10041_c0_seq1_1_4.9e-219</name>
        <branch_length>0.257774021</branch_length>
      </clade>
      <clade>
        <branch_length>0.276910223</branch_length>
        <confidence type="unknown">100</confidence>
        <clade>
          <name>43_Capsaspora_owczarzaki|CAOG_06018T0_2_6.8e-255</name>
          <branch_length>9.91751E-4</branch_length>
        </clade>
        <clade>
          <name>43_Capsaspora_owczarzaki|CAOG_00692T0_1_6.5e-255</name>
          <branch_length>0.00109237</branch_length>
        </clade>
      </clade>
      <clade>
        <branch_length>0.269857718</branch_length>
        <confidence type="unknown">96</confidence>
        <clade>
          <branch_length>0.017465738</branch_length>
          <confidence type="unknown">87</confidence>
          <clade>
            <name>50_Acanthamoeba_castellanii|ACA1_039460_2_5.1e-253</name>
            <branch_length>0.022637871</branch_length>
          </clade>
          <clade>
            <name>50_Acanthamoeba_castellanii|ACA1_366890_3_1.1e-252</name>
            <branch_length>0.008384121</branch_length>
          </clade>
        </clade>
        <clade>
          <name>50_Acanthamoeba_castellanii|ACA1_364420_1_0</name>
          <branch_length>0.037280646</branch_length>
        </clade>
      </clade>
      <clade>
        <name>03_Salpingoeca_punica|comp16274_c1_seq2_1_9.8e-253</name>
        <branch_length>0.29960139</branch_length>
      </clade>
      <clade>
        <branch_length>0.37928618</branch_length>
        <confidence type="unknown">100</confidence>
        <clade>
          <name>55_Emiliania_huxleyi|441942_1_2.5e-237</name>
          <branch_length>0.02717954</branch_length>
        </clade>
        <clade>
          <branch_length>0.008535225</branch_length>
          <confidence type="unknown">100</confidence>
          <clade>
            <name>55_Emiliania_huxleyi|432366_3_4.1e-237</name>
            <branch_length>1.844E-6</branch_length>
          </clade>
          <clade>
            <name>55_Emiliania_huxleyi|432373_2_4e-237</name>
            <branch_length>1.844E-6</branch_length>
          </clade>
        </clade>
      </clade>
      <clade>
        <name>09_Salpingoeca_kvevrii|comp10800_c0_seq1_1_3.3e-247</name>
        <branch_length>0.328535227</branch_length>
      </clade>
      <clade>
        <name>04_Salpingoeca_urceolata|comp19597_c0_seq4_1_1.3e-249</name>
        <branch_length>0.288553118</branch_length>
      </clade>
      <clade>
        <branch_length>0.303174153</branch_length>
        <confidence type="unknown">91</confidence>
        <clade>
          <name>08_Helgoeca_nana|comp25775_c0_seq1_1_3.5e-195</name>
          <branch_length>0.027411975</branch_length>
        </clade>
        <clade>
          <branch_length>0.0156936</branch_length>
          <confidence type="unknown">99</confidence>
          <clade>
            <name>02_Acanthoeca_spectabilis|comp16397_c1_seq4_2_7.9e-257</name>
            <branch_length>0.002991269</branch_length>
          </clade>
          <clade>
            <name>02_Acanthoeca_spectabilis|comp16397_c1_seq5_1_7.8e-257</name>
            <branch_length>0.001298372</branch_length>
          </clade>
        </clade>
      </clade>
      <clade>
        <name>14_Savillea_parva|comp11563_c0_seq1_1_7.6e-253</name>
        <branch_length>0.350608138</branch_length>
      </clade>
      <clade>
        <branch_length>0.405176517</branch_length>
        <confidence type="unknown">65</confidence>
        <clade>
          <name>07_Stephanoeca_diplocostata_AU|comp22344_c0_seq3_1_9.7e-132</name>
          <branch_length>0.008293167</branch_length>
        </clade>
        <clade>
          <branch_length>0.035344553</branch_length>
          <confidence type="unknown">92</confidence>
          <clade>
            <name>07_Stephanoeca_diplocostata_AU|comp22344_c3_seq2_3_1.4e-114</name>
            <branch_length>1.844E-6</branch_length>
          </clade>
          <clade>
            <name>07_Stephanoeca_diplocostata_FR|comp19908_c2_seq1_1_8.2e-131</name>
            <branch_length>0.006221636</branch_length>
          </clade>
        </clade>
        <clade>
          <name>07_Stephanoeca_diplocostata_FR|comp19908_c2_seq3_3_1.1e-107</name>
          <branch_length>0.012652642</branch_length>
        </clade>
      </clade>
      <clade>
        <branch_length>0.398695636</branch_length>
        <confidence type="unknown">69</confidence>
        <clade>
          <branch_length>0.103159604</branch_length>
          <confidence type="unknown">100</confidence>
          <clade>
            <name>10_Didymoeca_costata|comp16066_c1_seq1_2_1.8e-138</name>
            <branch_length>0.004153356</branch_length>
          </clade>
          <clade>
            <name>10_Didymoeca_costata|comp16066_c1_seq2_1_1.5e-138</name>
            <branch_length>1.844E-6</branch_length>
          </clade>
        </clade>
        <clade>
          <branch_length>0.036419121</branch_length>
          <confidence type="unknown">83</confidence>
          <clade>
            <name>01_Diaphanoeca_grandis|comp12688_c0_seq1_2_4.7e-160</name>
            <branch_length>0.314211687</branch_length>
          </clade>
          <clade>
            <name>01_Diaphanoeca_grandis|comp33416_c0_seq1_1_4.2e-238</name>
            <branch_length>0.017357288</branch_length>
          </clade>
        </clade>
      </clade>
      <clade>
        <branch_length>0.305290677</branch_length>
        <confidence type="unknown">100</confidence>
        <clade>
          <name>18_Salpingoeca_helianthica|comp15346_c0_seq1_1_1.9e-266</name>
          <branch_length>1.844E-6</branch_length>
        </clade>
        <clade>
          <name>18_Salpingoeca_helianthica|comp15346_c0_seq2_2_2.1e-266</name>
          <branch_length>1.844E-6</branch_length>
        </clade>
      </clade>
      <clade>
        <name>17_Codosiga_hollandica|comp52078_c1_seq1_1_9.6e-172</name>
        <branch_length>0.307187483</branch_length>
      </clade>
      <clade>
        <branch_length>0.357526602</branch_length>
        <confidence type="unknown">100</confidence>
        <clade>
          <name>06_Salpingoeca_macrocollata|comp22230_c1_seq2_1_1.6e-254</name>
          <branch_length>1.844E-6</branch_length>
        </clade>
        <clade>
          <name>06_Salpingoeca_macrocollata|comp22230_c1_seq1_2_1.7e-254</name>
          <branch_length>1.844E-6</branch_length>
        </clade>
      </clade>
      <clade>
        <name>20_Monosiga_brevicollis|37852_1_5.2e-269</name>
        <branch_length>0.317231863</branch_length>
      </clade>
      <clade>
        <branch_length>0.184093919</branch_length>
        <confidence type="unknown">99</confidence>
        <clade>
          <name>37_Daphnia_pulex|306442_1_8.7e-247</name>
          <branch_length>0.071174477</branch_length>
        </clade>
        <clade>
          <branch_length>0.030248565</branch_length>
          <confidence type="unknown">84</confidence>
          <clade>
            <name>37_Daphnia_pulex|190689_3_1.8e-239</name>
            <branch_length>0.078596829</branch_length>
          </clade>
          <clade>
            <name>37_Daphnia_pulex|305550_2_4e-241</name>
            <branch_length>0.108765935</branch_length>
          </clade>
        </clade>
      </clade>
      <clade>
        <branch_length>0.237291426</branch_length>
        <confidence type="unknown">100</confidence>
        <clade>
          <name>38_Drosophila_melanogaster|FBtr0100662_3_1.1e-250</name>
          <branch_length>1.844E-6</branch_length>
        </clade>
        <clade>
          <name>38_Drosophila_melanogaster|FBtr0100663_2_7.5e-251</name>
          <branch_length>3.687E-6</branch_length>
        </clade>
        <clade>
          <name>38_Drosophila_melanogaster|FBtr0070822_1_5e-251</name>
          <branch_length>3.687E-6</branch_length>
        </clade>
      </clade>
      <clade>
        <name>52_Chlamydomonas_reinhardtii|Cre13.g603700.t1.2_1_6.9e-231</name>
        <branch_length>0.422247186</branch_length>
      </clade>
      <clade>
        <name>52_Chlamydomonas_reinhardtii|g3654.t1_2_9.7e-125</name>
        <branch_length>1.329157223</branch_length>
      </clade>
      <clade>
        <name>59_Thalassiosira_pseudonana|41068_3_1.9e-09</name>
        <branch_length>5.015366027</branch_length>
      </clade>
      <clade>
        <name>04_Salpingoeca_urceolata|comp22734_c0_seq1_3_4.4e-110</name>
        <branch_length>1.826862943</branch_length>
      </clade>
      <clade>
        <branch_length>0.368515538</branch_length>
        <confidence type="unknown">100</confidence>
        <clade>
          <name>32_Mus_musculus|439253889_2_6.5e-230</name>
          <branch_length>1.844E-6</branch_length>
        </clade>
        <clade>
          <name>32_Mus_musculus|439253892_3_6.8e-230</name>
          <branch_length>1.844E-6</branch_length>
        </clade>
      </clade>
      <clade>
        <branch_length>0.360725296</branch_length>
        <confidence type="unknown">84</confidence>
        <clade>
          <name>33_Branchiostoma_floridae|126063_1_0</name>
          <branch_length>0.257088439</branch_length>
        </clade>
        <clade>
          <name>33_Branchiostoma_floridae|90895_3_7.5e-262</name>
          <branch_length>0.217495889</branch_length>
        </clade>
      </clade>
      <clade>
        <name>33_Branchiostoma_floridae|127491_2_7.2e-264</name>
        <branch_length>0.432273575</branch_length>
      </clade>
      <clade>
        <name>32_Mus_musculus|145966868_1_3.6e-235</name>
        <branch_length>0.331085558</branch_length>
      </clade>
      <clade>
        <branch_length>0.29102517</branch_length>
        <confidence type="unknown">100</confidence>
        <clade>
          <name>31_Gasterosteus_aculeatus|ENSGACT00000010474_1_2.3e-248</name>
          <branch_length>1.844E-6</branch_length>
        </clade>
        <clade>
          <branch_length>1.844E-6</branch_length>
          <confidence type="unknown">100</confidence>
          <clade>
            <name>31_Gasterosteus_aculeatus|ENSGACT00000010452_2_1.3e-247</name>
            <branch_length>1.844E-6</branch_length>
          </clade>
          <clade>
            <name>31_Gasterosteus_aculeatus|ENSGACT00000010448_3_1.4e-247</name>
            <branch_length>1.844E-6</branch_length>
          </clade>
        </clade>
      </clade>
      <clade>
        <branch_length>0.069354565</branch_length>
        <confidence type="unknown">68</confidence>
        <clade>
          <name>30_Ciona_intestinalis|ENSCINT00000001538_1_5.5e-231</name>
          <branch_length>0.083342456</branch_length>
        </clade>
        <clade>
          <branch_length>0.101320703</branch_length>
          <confidence type="unknown">96</confidence>
          <clade>
            <name>30_Ciona_intestinalis|ENSCINT00000014519_3_1.2e-215</name>
            <branch_length>0.132333995</branch_length>
          </clade>
          <clade>
            <name>30_Ciona_intestinalis|ENSCINT00000015480_2_3e-226</name>
            <branch_length>0.055587673</branch_length>
          </clade>
        </clade>
      </clade>
      <clade>
        <branch_length>0.132247628</branch_length>
        <confidence type="unknown">67</confidence>
        <clade>
          <name>28_Acropora_digitifera|05332_3_9.9e-214</name>
          <branch_length>0.179745265</branch_length>
        </clade>
        <clade>
          <branch_length>0.095894926</branch_length>
          <confidence type="unknown">99</confidence>
          <clade>
            <name>28_Acropora_digitifera|11679_1_5.2e-218</name>
            <branch_length>0.080742147</branch_length>
          </clade>
          <clade>
            <name>28_Acropora_digitifera|11680_2_8.4e-218</name>
            <branch_length>0.051191388</branch_length>
          </clade>
        </clade>
      </clade>
      <clade>
        <branch_length>0.326552448</branch_length>
        <confidence type="unknown">97</confidence>
        <clade>
          <branch_length>0.104020506</branch_length>
          <confidence type="unknown">100</confidence>
          <clade>
            <name>51_Arabidopsis_thaliana|AT1G49240.1_2_1.4e-198</name>
            <branch_length>0.053915871</branch_length>
          </clade>
          <clade>
            <name>51_Arabidopsis_thaliana|AT3G18780.2_1_1.5e-200</name>
            <branch_length>0.067593739</branch_length>
          </clade>
        </clade>
        <clade>
          <name>51_Arabidopsis_thaliana|AT5G09810.1_3_1.5e-198</name>
          <branch_length>0.123453586</branch_length>
        </clade>
      </clade>
      <clade>
        <branch_length>0.198886222</branch_length>
        <confidence type="unknown">94</confidence>
        <clade>
          <branch_length>0.074290565</branch_length>
          <confidence type="unknown">96</confidence>
          <clade>
            <name>42_Helobdella_robusta|185110_3_1.3e-205</name>
            <branch_length>0.103720183</branch_length>
          </clade>
          <clade>
            <name>42_Helobdella_robusta|155129_1_9.4e-223</name>
            <branch_length>0.117775339</branch_length>
          </clade>
        </clade>
        <clade>
          <name>42_Helobdella_robusta|185075_2_5e-211</name>
          <branch_length>0.164797636</branch_length>
        </clade>
      </clade>
      <clade>
        <name>40_Lottia_gigantea|193218_1_1.5e-215</name>
        <branch_length>0.296472897</branch_length>
      </clade>
      <clade>
        <branch_length>0.353948529</branch_length>
        <confidence type="unknown">99</confidence>
        <clade>
          <name>40_Lottia_gigantea|208208_3_1.8e-198</name>
          <branch_length>0.037347807</branch_length>
        </clade>
        <clade>
          <name>40_Lottia_gigantea|227913_2_1.2e-201</name>
          <branch_length>0.037349231</branch_length>
        </clade>
      </clade>
      <clade>
        <branch_length>0.375151124</branch_length>
        <confidence type="unknown">77</confidence>
        <clade>
          <branch_length>0.05667699</branch_length>
          <confidence type="unknown">98</confidence>
          <clade>
            <name>45_Rhizopus_oryzae|RO3G_12558T0_2_1.7e-209</name>
            <branch_length>0.026239591</branch_length>
          </clade>
          <clade>
            <name>45_Rhizopus_oryzae|RO3G_14002T0_1_9.5e-213</name>
            <branch_length>0.030792945</branch_length>
          </clade>
        </clade>
        <clade>
          <name>46_Schizosaccharomyces_pombe|SPBC32H8.12c.1_1_7.3e-207</name>
          <branch_length>0.194962448</branch_length>
        </clade>
      </clade>
      <clade>
        <branch_length>0.33409074</branch_length>
        <confidence type="unknown">62</confidence>
        <clade>
          <branch_length>0.078381953</branch_length>
          <confidence type="unknown">99</confidence>
          <clade>
            <name>26_Hydra_vulgaris|Hma2.208898_2_2.2e-191</name>
            <branch_length>0.083474921</branch_length>
          </clade>
          <clade>
            <name>26_Hydra_vulgaris|Hma2.230764_1_1.6e-192</name>
            <branch_length>0.101067003</branch_length>
          </clade>
        </clade>
        <clade>
          <branch_length>0.117055363</branch_length>
          <confidence type="unknown">86</confidence>
          <clade>
            <branch_length>0.043800568</branch_length>
            <confidence type="unknown">87</confidence>
            <clade>
              <name>29_Trichoplax_adhaerens|56111_3_3.2e-192</name>
              <branch_length>0.035403675</branch_length>
            </clade>
            <clade>
              <name>29_Trichoplax_adhaerens|35956_2_4e-195</name>
              <branch_length>0.051635174</branch_length>
            </clade>
          </clade>
          <clade>
            <name>29_Trichoplax_adhaerens|63375_1_6.9e-197</name>
            <branch_length>0.107379266</branch_length>
          </clade>
        </clade>
      </clade>
      <clade>
        <name>24_Amphimedon_queenslandica|Aqu1.229446_3_8.7e-98</name>
        <branch_length>1.326295698</branch_length>
      </clade>
      <clade>
        <branch_length>0.39670822</branch_length>
        <confidence type="unknown">95</confidence>
        <clade>
          <branch_length>0.108567588</branch_length>
          <confidence type="unknown">100</confidence>
          <clade>
            <name>54_Naegleria_gruberi|82840_1_5.2e-182</name>
            <branch_length>1.844E-6</branch_length>
          </clade>
          <clade>
            <branch_length>0.007280352</branch_length>
            <confidence type="unknown">57</confidence>
            <clade>
              <name>54_Naegleria_gruberi|55502_2_4.8e-181</name>
              <branch_length>0.00623105</branch_length>
            </clade>
            <clade>
              <name>54_Naegleria_gruberi|55537_3_5.9e-180</name>
              <branch_length>0.001251529</branch_length>
            </clade>
          </clade>
        </clade>
        <clade>
          <branch_length>0.255505716</branch_length>
          <confidence type="unknown">100</confidence>
          <clade>
            <name>57_Tetrahymena_thermophila|3697_1_1.5e-164</name>
            <branch_length>0.111369823</branch_length>
          </clade>
          <clade>
            <branch_length>0.453092113</branch_length>
            <confidence type="unknown">100</confidence>
            <clade>
              <name>57_Tetrahymena_thermophila|133_3_1.1e-82</name>
              <branch_length>0.109923388</branch_length>
            </clade>
            <clade>
              <name>57_Tetrahymena_thermophila|3693_2_2.3e-95</name>
              <branch_length>0.03643872</branch_length>
            </clade>
          </clade>
        </clade>
      </clade>
      <clade>
        <branch_length>0.427353912</branch_length>
        <confidence type="unknown">99</confidence>
        <clade>
          <name>49_Dictyostelium_discoideum|DDB0216213_1_7.3e-204</name>
          <branch_length>0.007338956</branch_length>
        </clade>
        <clade>
          <branch_length>0.004189884</branch_length>
          <confidence type="unknown">61</confidence>
          <clade>
            <name>49_Dictyostelium_discoideum|DDB0220449_2_3.7e-203</name>
            <branch_length>0.005253423</branch_length>
          </clade>
          <clade>
            <name>49_Dictyostelium_discoideum|DDB0220448_3_7.4e-202</name>
            <branch_length>0.002922259</branch_length>
          </clade>
        </clade>
      </clade>
      <clade>
        <branch_length>0.403135789</branch_length>
        <confidence type="unknown">98</confidence>
        <clade>
          <name>39_Tetranychus_urticae|tetur09g05360_2_1.2e-201</name>
          <branch_length>0.00324733</branch_length>
        </clade>
        <clade>
          <name>39_Tetranychus_urticae|tetur09g05350_3_3.5e-201</name>
          <branch_length>0.014321007</branch_length>
        </clade>
      </clade>
      <clade>
        <name>39_Tetranychus_urticae|tetur03g09480_1_2.3e-214</name>
        <branch_length>0.375268731</branch_length>
      </clade>
    </clade>
    <clade>
      <name>27_Nematostella_vectensis|234494_2_6.5e-238</name>
      <branch_length>0.045928562</branch_length>
    </clade>
    <clade>
      <name>27_Nematostella_vectensis|188243_1_6.7e-239</name>
      <branch_length>0.039745273</branch_length>
    </clade>
    <clade>
      <name>27_Nematostella_vectensis|169611_3_1.7e-236</name>
      <branch_length>0.050927212</branch_length>
    </clade>
  </clade>
</phylogeny>
<phylogeny rooted="false" rerootable="true">
  <name>alpha_tubulin</name>
  <clade>
    <clade>
      <name>30_Ciona_intestinalis|ENSCINT00000002012_2_7e-261</name>
      <branch_length>0.146248513</branch_length>
    </clade>
    <clade>
      <branch_length>0.076169788</branch_length>
      <confidence type="unknown">71</confidence>
      <clade>
        <branch_length>0.072524238</branch_length>
        <confidence type="unknown">60</confidence>
        <clade>
          <branch_length>0.038502371</branch_length>
          <confidence type="unknown">50</confidence>
          <clade>
            <name>40_Lottia_gigantea|223558_2_2.7e-257</name>
            <branch_length>0.077407121</branch_length>
          </clade>
          <clade>
            <name>40_Lottia_gigantea|200382_3_2.1e-249</name>
            <branch_length>0.198662445</branch_length>
          </clade>
          <clade>
            <name>40_Lottia_gigantea|181858_1_1.8e-261</name>
            <branch_length>0.102288026</branch_length>
          </clade>
        </clade>
        <clade>
          <branch_length>0.266091215</branch_length>
          <confidence type="unknown">100</confidence>
          <clade>
            <name>42_Helobdella_robusta|94829_3_3e-226</name>
            <branch_length>0.142936023</branch_length>
          </clade>
          <clade>
            <name>42_Helobdella_robusta|185172_2_1.3e-243</name>
            <branch_length>0.07877001</branch_length>
          </clade>
        </clade>
      </clade>
      <clade>
        <branch_length>0.179576358</branch_length>
        <confidence type="unknown">71</confidence>
        <clade>
          <name>39_Tetranychus_urticae|tetur07g05180_2_1.5e-225</name>
          <branch_length>0.218225403</branch_length>
        </clade>
        <clade>
          <name>39_Tetranychus_urticae|tetur03g00230_1_5.6e-226</name>
          <branch_length>0.203242473</branch_length>
        </clade>
      </clade>
      <clade>
        <branch_length>0.438690878</branch_length>
        <confidence type="unknown">97</confidence>
        <clade>
          <name>24_Amphimedon_queenslandica|Aqu1.219317_2_3.9e-199</name>
          <branch_length>0.243060767</branch_length>
        </clade>
        <clade>
          <name>24_Amphimedon_queenslandica|Aqu1.219319_3_6.9e-161</name>
          <branch_length>0.389252866</branch_length>
        </clade>
      </clade>
      <clade>
        <branch_length>0.273940249</branch_length>
        <confidence type="unknown">61</confidence>
        <clade>
          <branch_length>0.308447767</branch_length>
          <confidence type="unknown">97</confidence>
          <clade>
            <name>46_Schizosaccharomyces_pombe|SPBC16A3.15c.1_1_4.7e-170</name>
            <branch_length>0.274206416</branch_length>
          </clade>
          <clade>
            <name>46_Schizosaccharomyces_pombe|SPBC800.05c.1_2_4e-161</name>
            <branch_length>0.232814752</branch_length>
          </clade>
        </clade>
        <clade>
          <branch_length>0.056129218</branch_length>
          <confidence type="unknown">97</confidence>
          <clade>
            <name>45_Rhizopus_oryzae|RO3G_09687T0_3_2.3e-232</name>
            <branch_length>0.197975181</branch_length>
          </clade>
          <clade>
            <branch_length>0.083083104</branch_length>
            <confidence type="unknown">100</confidence>
            <clade>
              <name>45_Rhizopus_oryzae|RO3G_04842T0_1_2e-249</name>
              <branch_length>0.043032783</branch_length>
            </clade>
            <clade>
              <name>45_Rhizopus_oryzae|RO3G_04154T0_2_5.5e-248</name>
              <branch_length>0.047702313</branch_length>
            </clade>
          </clade>
        </clade>
      </clade>
      <clade>
        <branch_length>0.375943242</branch_length>
        <confidence type="unknown">100</confidence>
        <clade>
          <name>29_Trichoplax_adhaerens|54910_3_5e-237</name>
          <branch_length>0.002541461</branch_length>
        </clade>
        <clade>
          <branch_length>0.00885425</branch_length>
          <confidence type="unknown">88</confidence>
          <clade>
            <name>29_Trichoplax_adhaerens|63797_1_2.2e-237</name>
            <branch_length>0.017484415</branch_length>
          </clade>
          <clade>
            <name>29_Trichoplax_adhaerens|62809_2_4.6e-237</name>
            <branch_length>0.006620126</branch_length>
          </clade>
        </clade>
      </clade>
      <clade>
        <branch_length>0.444034762</branch_length>
        <confidence type="unknown">100</confidence>
        <clade>
          <name>26_Hydra_vulgaris|Hma2.210271_2_3.1e-216</name>
          <branch_length>1.756E-6</branch_length>
        </clade>
        <clade>
          <name>26_Hydra_vulgaris|Hma2.210270_1_2.4e-216</name>
          <branch_length>1.756E-6</branch_length>
        </clade>
      </clade>
      <clade>
        <name>26_Hydra_vulgaris|Hma2.224926_3_4.1e-185</name>
        <branch_length>0.746027318</branch_length>
      </clade>
      <clade>
        <name>22_Oscarella_pearsei|comp64270_c0_seq1_3_1.1e-145</name>
        <branch_length>1.504572774</branch_length>
      </clade>
      <clade>
        <name>28_Acropora_digitifera|14147_3_1.1e-163</name>
        <branch_length>0.891657952</branch_length>
      </clade>
      <clade>
        <name>30_Ciona_intestinalis|ENSCINT00000015767_1_8.7e-291</name>
        <branch_length>0.177118313</branch_length>
      </clade>
      <clade>
        <branch_length>0.15065313</branch_length>
        <confidence type="unknown">97</confidence>
        <clade>
          <name>37_Daphnia_pulex|315805_3_2.3e-272</name>
          <branch_length>0.128244392</branch_length>
        </clade>
        <clade>
          <branch_length>0.03635011</branch_length>
          <confidence type="unknown">54</confidence>
          <clade>
            <name>37_Daphnia_pulex|220904_1_6.1e-279</name>
            <branch_length>0.118571004</branch_length>
          </clade>
          <clade>
            <name>37_Daphnia_pulex|301837_2_2.4e-277</name>
            <branch_length>0.07141929</branch_length>
          </clade>
        </clade>
      </clade>
      <clade>
        <name>42_Helobdella_robusta|185885_1_1.2e-271</name>
        <branch_length>0.255913</branch_length>
      </clade>
      <clade>
        <branch_length>0.230890274</branch_length>
        <confidence type="unknown">71</confidence>
        <clade>
          <branch_length>0.049050833</branch_length>
          <confidence type="unknown">74</confidence>
          <clade>
            <name>34_Strongylocentrotus_purpuratus|390341328_1_0</name>
            <branch_length>0.026550573</branch_length>
          </clade>
          <clade>
            <name>34_Strongylocentrotus_purpuratus|390341309_2_0</name>
            <branch_length>0.038959807</branch_length>
          </clade>
        </clade>
        <clade>
          <name>34_Strongylocentrotus_purpuratus|390356351_3_0</name>
          <branch_length>0.090309683</branch_length>
        </clade>
      </clade>
      <clade>
        <branch_length>0.332725299</branch_length>
        <confidence type="unknown">99</confidence>
        <clade>
          <name>25_Mnemiopsis_leidyi|ML10942_2_1.9e-275</name>
          <branch_length>0.144263477</branch_length>
        </clade>
        <clade>
          <branch_length>0.047324975</branch_length>
          <confidence type="unknown">100</confidence>
          <clade>
            <name>25_Mnemiopsis_leidyi|ML026516_3_4.8e-272</name>
            <branch_length>0.037011475</branch_length>
          </clade>
          <clade>
            <name>25_Mnemiopsis_leidyi|ML01482_1_1.8e-278</name>
            <branch_length>0.026804838</branch_length>
          </clade>
        </clade>
      </clade>
      <clade>
        <branch_length>0.277477481</branch_length>
        <confidence type="unknown">84</confidence>
        <clade>
          <name>41_Capitella_teleta|156933_1_3.6e-302</name>
          <branch_length>0.07607679</branch_length>
        </clade>
        <clade>
          <branch_length>0.026121582</branch_length>
          <confidence type="unknown">96</confidence>
          <clade>
            <name>41_Capitella_teleta|868_3_2.4e-299</name>
            <branch_length>0.051752084</branch_length>
          </clade>
          <clade>
            <name>41_Capitella_teleta|149167_2_4e-300</name>
            <branch_length>0.040206545</branch_length>
          </clade>
        </clade>
      </clade>
      <clade>
        <branch_length>0.33175744</branch_length>
        <confidence type="unknown">54</confidence>
        <clade>
          <branch_length>0.155247669</branch_length>
          <confidence type="unknown">100</confidence>
          <clade>
            <name>32_Mus_musculus|118130393_1_3.5e-282</name>
            <branch_length>0.017299161</branch_length>
          </clade>
          <clade>
            <branch_length>0.005063503</branch_length>
            <confidence type="unknown">100</confidence>
            <clade>
              <name>32_Mus_musculus|111186463_2_2.9e-281</name>
              <branch_length>1.756E-6</branch_length>
            </clade>
            <clade>
              <name>32_Mus_musculus|568992007_3_3.2e-281</name>
              <branch_length>1.756E-6</branch_length>
            </clade>
          </clade>
        </clade>
        <clade>
          <branch_length>0.082887882</branch_length>
          <confidence type="unknown">98</confidence>
          <clade>
            <branch_length>0.033652313</branch_length>
            <confidence type="unknown">83</confidence>
            <clade>
              <name>31_Gasterosteus_aculeatus|ENSGACT00000005321_3_1.9e-284</name>
              <branch_length>0.021753948</branch_length>
            </clade>
            <clade>
              <name>31_Gasterosteus_aculeatus|ENSGACT00000005327_1_7.7e-287</name>
              <branch_length>0.022145323</branch_length>
            </clade>
          </clade>
          <clade>
            <name>31_Gasterosteus_aculeatus|ENSGACT00000004881_2_1.8e-284</name>
            <branch_length>0.100675466</branch_length>
          </clade>
        </clade>
      </clade>
      <clade>
        <name>23_Ephydatia_muelleri|comp67422_c1_seq14_1_1.2e-295</name>
        <branch_length>0.459807917</branch_length>
      </clade>
      <clade>
        <name>24_Amphimedon_queenslandica|Aqu1.229186_1_9.6e-211</name>
        <branch_length>0.916832332</branch_length>
      </clade>
      <clade>
        <branch_length>0.627607782</branch_length>
        <confidence type="unknown">98</confidence>
        <clade>
          <name>23_Ephydatia_muelleri|comp67422_c1_seq15_3_8.5e-245</name>
          <branch_length>0.098310073</branch_length>
        </clade>
        <clade>
          <name>23_Ephydatia_muelleri|comp67422_c1_seq9_2_2.3e-245</name>
          <branch_length>0.07251102</branch_length>
        </clade>
      </clade>
      <clade>
        <branch_length>0.308827568</branch_length>
        <confidence type="unknown">92</confidence>
        <clade>
          <name>33_Branchiostoma_floridae|58035_1_0</name>
          <branch_length>0.029846246</branch_length>
        </clade>
        <clade>
          <branch_length>0.018876351</branch_length>
          <confidence type="unknown">97</confidence>
          <clade>
            <name>33_Branchiostoma_floridae|102751_2_0</name>
            <branch_length>0.012844947</branch_length>
          </clade>
          <clade>
            <name>33_Branchiostoma_floridae|115374_3_0</name>
            <branch_length>0.014992872</branch_length>
          </clade>
        </clade>
      </clade>
      <clade>
        <branch_length>0.369913582</branch_length>
        <confidence type="unknown">70</confidence>
        <clade>
          <name>38_Drosophila_melanogaster|FBtr0081639_1_0</name>
          <branch_length>0.023331295</branch_length>
        </clade>
        <clade>
          <name>38_Drosophila_melanogaster|FBtr0082087_3_3.1e-278</name>
          <branch_length>0.219023731</branch_length>
        </clade>
        <clade>
          <name>38_Drosophila_melanogaster|FBtr0081538_2_5e-294</name>
          <branch_length>0.091671829</branch_length>
        </clade>
      </clade>
      <clade>
        <branch_length>0.454503283</branch_length>
        <confidence type="unknown">63</confidence>
        <clade>
          <name>03_Salpingoeca_punica|comp11355_c0_seq1_1_0</name>
          <branch_length>0.028036286</branch_length>
        </clade>
        <clade>
          <name>06_Salpingoeca_macrocollata|comp5315_c0_seq1_1_8.7e-301</name>
          <branch_length>0.098451881</branch_length>
        </clade>
      </clade>
      <clade>
        <name>09_Salpingoeca_kvevrii|comp11123_c0_seq1_1_0</name>
        <branch_length>0.501038603</branch_length>
      </clade>
      <clade>
        <branch_length>0.556785077</branch_length>
        <confidence type="unknown">87</confidence>
        <clade>
          <name>02_Acanthoeca_spectabilis|comp13996_c2_seq1_1_0</name>
          <branch_length>0.059008427</branch_length>
        </clade>
        <clade>
          <name>08_Helgoeca_nana|comp9851_c0_seq1_1_0</name>
          <branch_length>0.082595413</branch_length>
        </clade>
        <clade>
          <name>14_Savillea_parva|comp11737_c0_seq1_1_0</name>
          <branch_length>0.074731507</branch_length>
        </clade>
        <clade>
          <branch_length>0.105329166</branch_length>
          <confidence type="unknown">78</confidence>
          <clade>
            <branch_length>0.083422529</branch_length>
            <confidence type="unknown">100</confidence>
            <clade>
              <name>07_Stephanoeca_diplocostata_AU|comp16426_c0_seq1_1_0</name>
              <branch_length>1.756E-6</branch_length>
            </clade>
            <clade>
              <name>07_Stephanoeca_diplocostata_FR|comp17006_c0_seq1_1_0</name>
              <branch_length>1.756E-6</branch_length>
            </clade>
          </clade>
          <clade>
            <branch_length>0.061070979</branch_length>
            <confidence type="unknown">92</confidence>
            <clade>
              <name>01_Diaphanoeca_grandis|comp32564_c0_seq1_1_0</name>
              <branch_length>0.059679866</branch_length>
            </clade>
            <clade>
              <name>10_Didymoeca_costata|comp16601_c0_seq1_1_0</name>
              <branch_length>0.132731846</branch_length>
            </clade>
          </clade>
        </clade>
      </clade>
      <clade>
        <name>04_Salpingoeca_urceolata|comp19007_c1_seq2_1_0</name>
        <branch_length>0.548682362</branch_length>
      </clade>
      <clade>
        <branch_length>0.474082104</branch_length>
        <confidence type="unknown">52</confidence>
        <clade>
          <name>21_Salpingoeca_rosetta|PTSG_03784T0_1_0</name>
          <branch_length>0.03778582</branch_length>
        </clade>
        <clade>
          <name>20_Monosiga_brevicollis|17634_1_0</name>
          <branch_length>0.072706909</branch_length>
        </clade>
        <clade>
          <branch_length>0.112597996</branch_length>
          <confidence type="unknown">73</confidence>
          <clade>
            <name>16_Salpingoeca_dolichothecata|comp26822_c0_seq1_1_0</name>
            <branch_length>0.080961407</branch_length>
          </clade>
          <clade>
            <name>11_Choanoeca_perplexa|comp14643_c0_seq1_1_0</name>
            <branch_length>0.109298936</branch_length>
          </clade>
        </clade>
        <clade>
          <branch_length>0.076970338</branch_length>
          <confidence type="unknown">61</confidence>
          <clade>
            <branch_length>0.051278443</branch_length>
            <confidence type="unknown">90</confidence>
            <clade>
              <branch_length>0.05708351</branch_length>
              <confidence type="unknown">93</confidence>
              <clade>
                <name>05_Hartaetosiga_gracilis|comp9829_c0_seq1_1_0</name>
                <branch_length>0.043454558</branch_length>
              </clade>
              <clade>
                <name>15_Hartaetosiga_balthica|comp6727_c0_seq1_1_0</name>
                <branch_length>0.080676067</branch_length>
              </clade>
            </clade>
            <clade>
              <name>12_Salpingoeca_infusionum|comp16186_c0_seq1_1_0</name>
              <branch_length>0.052005746</branch_length>
            </clade>
          </clade>
          <clade>
            <name>13_Microstomoeca_roanoka|comp12680_c0_seq1_1_0</name>
            <branch_length>0.041833918</branch_length>
          </clade>
        </clade>
      </clade>
      <clade>
        <name>18_Salpingoeca_helianthica|comp15266_c0_seq1_1_0</name>
        <branch_length>0.527432927</branch_length>
      </clade>
      <clade>
        <name>19_Mylnosiga_fluctuans|comp9962_c0_seq1_1_0</name>
        <branch_length>0.524736679</branch_length>
      </clade>
      <clade>
        <name>17_Codosiga_hollandica|comp56135_c0_seq1_2_4.3e-161</name>
        <branch_length>0.470445501</branch_length>
      </clade>
      <clade>
        <name>17_Codosiga_hollandica|comp56135_c1_seq1_1_3.2e-161</name>
        <branch_length>0.470445501</branch_length>
      </clade>
      <clade>
        <name>15_Hartaetosiga_balthica|comp8811_c0_seq7_3_9.8e-16</name>
        <branch_length>7.986576266</branch_length>
      </clade>
      <clade>
        <name>18_Salpingoeca_helianthica|comp8925_c0_seq2_2_1.9e-90</name>
        <branch_length>2.226190175</branch_length>
      </clade>
      <clade>
        <branch_length>0.765123912</branch_length>
        <confidence type="unknown">94</confidence>
        <clade>
          <name>17_Codosiga_hollandica|comp56433_c0_seq1_3_8e-119</name>
          <branch_length>1.341600207</branch_length>
        </clade>
        <clade>
          <name>03_Salpingoeca_punica|comp12519_c0_seq1_2_3.5e-104</name>
          <branch_length>1.416739225</branch_length>
        </clade>
      </clade>
      <clade>
        <name>36_Pristionchus_pacificus|PPA01431_3_4.7e-213</name>
        <branch_length>0.932570925</branch_length>
      </clade>
      <clade>
        <branch_length>0.527604721</branch_length>
        <confidence type="unknown">83</confidence>
        <clade>
          <name>48_Yarrowia_lipolytica|YALI0E19360g_1_2.4e-227</name>
          <branch_length>0.315665344</branch_length>
        </clade>
        <clade>
          <branch_length>0.159099843</branch_length>
          <confidence type="unknown">99</confidence>
          <clade>
            <name>44_Coprinopsis_cinerea|CC1G_01375T0_1_1.7e-232</name>
            <branch_length>0.159704994</branch_length>
          </clade>
          <clade>
            <name>44_Coprinopsis_cinerea|CC1G_00146T0_2_2e-222</name>
            <branch_length>0.222354857</branch_length>
          </clade>
        </clade>
      </clade>
      <clade>
        <name>43_Capsaspora_owczarzaki|CAOG_06901T0_1_8.9e-273</name>
        <branch_length>0.625130997</branch_length>
      </clade>
      <clade>
        <branch_length>0.565610699</branch_length>
        <confidence type="unknown">96</confidence>
        <clade>
          <branch_length>0.057506081</branch_length>
          <confidence type="unknown">96</confidence>
          <clade>
            <name>36_Pristionchus_pacificus|PPA22751_1_3.2e-264</name>
            <branch_length>0.072762089</branch_length>
          </clade>
          <clade>
            <name>36_Pristionchus_pacificus|PPA00215_2_1.7e-227</name>
            <branch_length>0.274209499</branch_length>
          </clade>
        </clade>
        <clade>
          <branch_length>0.119286733</branch_length>
          <confidence type="unknown">98</confidence>
          <clade>
            <name>35_Caenorhabditis_elegans|C47_1_2.6e-265</name>
            <branch_length>0.059606186</branch_length>
          </clade>
          <clade>
            <branch_length>0.129067908</branch_length>
            <confidence type="unknown">100</confidence>
            <clade>
              <name>35_Caenorhabditis_elegans|F26E4.8b_3_3.6e-256</name>
              <branch_length>1.756E-6</branch_length>
            </clade>
            <clade>
              <name>35_Caenorhabditis_elegans|F26E4.8a_2_3.5e-256</name>
              <branch_length>1.756E-6</branch_length>
            </clade>
          </clade>
        </clade>
      </clade>
      <clade>
        <branch_length>0.490103911</branch_length>
        <confidence type="unknown">100</confidence>
        <clade>
          <name>47_Homolaphlyctis_polyrhiza|hpol21625_2_0</name>
          <branch_length>1.756E-6</branch_length>
        </clade>
        <clade>
          <name>47_Homolaphlyctis_polyrhiza|hpol5148_1_0</name>
          <branch_length>1.756E-6</branch_length>
        </clade>
      </clade>
      <clade>
        <branch_length>1.775390762</branch_length>
        <confidence type="unknown">100</confidence>
        <clade>
          <branch_length>3.273999943</branch_length>
          <confidence type="unknown">100</confidence>
          <clade>
            <branch_length>0.36060747</branch_length>
            <confidence type="unknown">100</confidence>
            <clade>
              <name>08_Helgoeca_nana|comp24748_c0_seq6_3_7.5e-19</name>
              <branch_length>0.297955001</branch_length>
            </clade>
            <clade>
              <name>14_Savillea_parva|comp23511_c0_seq1_3_8.5e-23</name>
              <branch_length>0.271982672</branch_length>
            </clade>
          </clade>
          <clade>
            <name>01_Diaphanoeca_grandis|comp8553_c0_seq1_3_1.7e-11</name>
            <branch_length>0.623901448</branch_length>
          </clade>
          <clade>
            <name>10_Didymoeca_costata|comp7155_c0_seq1_3_1.6e-07</name>
            <branch_length>0.832174951</branch_length>
          </clade>
          <clade>
            <branch_length>0.481208643</branch_length>
            <confidence type="unknown">94</confidence>
            <clade>
              <name>04_Salpingoeca_urceolata|comp19253_c0_seq5_3_6.5e-26</name>
              <branch_length>0.463607506</branch_length>
            </clade>
            <clade>
              <branch_length>0.300849036</branch_length>
              <confidence type="unknown">59</confidence>
              <clade>
                <branch_length>0.278046432</branch_length>
                <confidence type="unknown">65</confidence>
                <clade>
                  <name>11_Choanoeca_perplexa|comp13595_c0_seq2_3_2.6e-12</name>
                  <branch_length>0.982315164</branch_length>
                </clade>
                <clade>
                  <name>05_Hartaetosiga_gracilis|comp9191_c0_seq1_3_2.8e-10</name>
                  <branch_length>0.912470134</branch_length>
                </clade>
              </clade>
              <clade>
                <name>16_Salpingoeca_dolichothecata|comp17476_c0_seq1_3_2.9e-17</name>
                <branch_length>0.650932305</branch_length>
              </clade>
            </clade>
            <clade>
              <branch_length>0.192534276</branch_length>
              <confidence type="unknown">58</confidence>
              <clade>
                <name>09_Salpingoeca_kvevrii|comp7926_c1_seq1_3_2.2e-29</name>
                <branch_length>0.487976258</branch_length>
              </clade>
              <clade>
                <name>19_Mylnosiga_fluctuans|comp18054_c0_seq1_3_2.4e-22</name>
                <branch_length>0.311438571</branch_length>
              </clade>
            </clade>
          </clade>
        </clade>
        <clade>
          <branch_length>0.399322599</branch_length>
          <confidence type="unknown">83</confidence>
          <clade>
            <branch_length>2.753096636</branch_length>
            <confidence type="unknown">100</confidence>
            <clade>
              <name>06_Salpingoeca_macrocollata|comp16499_c0_seq2_3_4.9e-21</name>
              <branch_length>0.466114296</branch_length>
            </clade>
            <clade>
              <name>07_Stephanoeca_diplocostata_FR|comp24295_c0_seq4_3_1.7e-17</name>
              <branch_length>0.309703097</branch_length>
            </clade>
          </clade>
          <clade>
            <branch_length>0.696941982</branch_length>
            <confidence type="unknown">99</confidence>
            <clade>
              <name>53_Chondrus_crispus|546310466_3_1.4e-49</name>
              <branch_length>0.483629827</branch_length>
            </clade>
            <clade>
              <branch_length>0.199444312</branch_length>
              <confidence type="unknown">55</confidence>
              <clade>
                <name>44_Coprinopsis_cinerea|CC1G_04743T0_3_2.1e-57</name>
                <branch_length>0.331141533</branch_length>
              </clade>
              <clade>
                <branch_length>0.335544687</branch_length>
                <confidence type="unknown">100</confidence>
                <clade>
                  <name>43_Capsaspora_owczarzaki|CAOG_03517T0_3_3.8e-62</name>
                  <branch_length>0.029933003</branch_length>
                </clade>
                <clade>
                  <name>43_Capsaspora_owczarzaki|CAOG_03516T0_2_2.9e-63</name>
                  <branch_length>0.054874099</branch_length>
                </clade>
              </clade>
              <clade>
                <name>47_Homolaphlyctis_polyrhiza|hpol2312_3_1.7e-62</name>
                <branch_length>0.328835682</branch_length>
              </clade>
              <clade>
                <branch_length>0.244461683</branch_length>
                <confidence type="unknown">89</confidence>
                <clade>
                  <branch_length>0.117555688</branch_length>
                  <confidence type="unknown">97</confidence>
                  <clade>
                    <branch_length>0.126835137</branch_length>
                    <confidence type="unknown">100</confidence>
                    <clade>
                      <name>59_Thalassiosira_pseudonana|8069_2_3.6e-46</name>
                      <branch_length>0.155261011</branch_length>
                    </clade>
                    <clade>
                      <name>59_Thalassiosira_pseudonana|31569_3_1.8e-43</name>
                      <branch_length>0.468311445</branch_length>
                    </clade>
                  </clade>
                  <clade>
                    <branch_length>0.044600954</branch_length>
                    <confidence type="unknown">59</confidence>
                    <clade>
                      <name>56_Guillardia_theta|97098_2_5.1e-52</name>
                      <branch_length>0.117991932</branch_length>
                    </clade>
                    <clade>
                      <name>56_Guillardia_theta|155883_3_5.7e-40</name>
                      <branch_length>0.216992318</branch_length>
                    </clade>
                  </clade>
                </clade>
                <clade>
                  <name>52_Chlamydomonas_reinhardtii|Cre12.g549550.t1.2_3_5.4e-54</name>
                  <branch_length>0.104251215</branch_length>
                </clade>
              </clade>
              <clade>
                <branch_length>0.266645513</branch_length>
                <confidence type="unknown">89</confidence>
                <clade>
                  <name>03_Salpingoeca_punica|comp14125_c0_seq1_3_1.2e-58</name>
                  <branch_length>0.006328166</branch_length>
                </clade>
                <clade>
                  <name>06_Salpingoeca_macrocollata|comp22768_c2_seq2_2_1.3e-45</name>
                  <branch_length>0.159007984</branch_length>
                </clade>
              </clade>
              <clade>
                <branch_length>0.288563233</branch_length>
                <confidence type="unknown">100</confidence>
                <clade>
                  <name>20_Monosiga_brevicollis|14310_2_3.8e-62</name>
                  <branch_length>0.005601358</branch_length>
                </clade>
                <clade>
                  <name>20_Monosiga_brevicollis|31534_3_1.8e-61</name>
                  <branch_length>1.756E-6</branch_length>
                </clade>
              </clade>
              <clade>
                <branch_length>0.361710787</branch_length>
                <confidence type="unknown">65</confidence>
                <clade>
                  <branch_length>0.036799906</branch_length>
                  <confidence type="unknown">95</confidence>
                  <clade>
                    <name>14_Savillea_parva|comp5816_c0_seq1_2_2.3e-62</name>
                    <branch_length>0.05836051</branch_length>
                  </clade>
                  <clade>
                    <branch_length>0.041291181</branch_length>
                    <confidence type="unknown">80</confidence>
                    <clade>
                      <name>08_Helgoeca_nana|comp18017_c0_seq1_2_4.8e-63</name>
                      <branch_length>0.07241197</branch_length>
                    </clade>
                    <clade>
                      <name>02_Acanthoeca_spectabilis|comp16528_c0_seq1_2_1.7e-34</name>
                      <branch_length>0.049009007</branch_length>
                    </clade>
                  </clade>
                  <clade>
                    <name>02_Acanthoeca_spectabilis|comp16528_c4_seq1_3_2.2e-29</name>
                    <branch_length>0.086902911</branch_length>
                  </clade>
                </clade>
                <clade>
                  <branch_length>0.057615224</branch_length>
                  <confidence type="unknown">74</confidence>
                  <clade>
                    <name>10_Didymoeca_costata|comp14424_c0_seq1_2_1.3e-55</name>
                    <branch_length>0.158514903</branch_length>
                  </clade>
                  <clade>
                    <branch_length>0.019900622</branch_length>
                    <confidence type="unknown">68</confidence>
                    <clade>
                      <name>01_Diaphanoeca_grandis|comp31510_c1_seq2_2_1e-65</name>
                      <branch_length>0.133712339</branch_length>
                    </clade>
                    <clade>
                      <branch_length>0.077514442</branch_length>
                      <confidence type="unknown">100</confidence>
                      <clade>
                        <name>07_Stephanoeca_diplocostata_AU|comp10141_c0_seq1_3_1.4e-35</name>
                        <branch_length>0.384687877</branch_length>
                      </clade>
                      <clade>
                        <branch_length>0.062094764</branch_length>
                        <confidence type="unknown">100</confidence>
                        <clade>
                          <name>07_Stephanoeca_diplocostata_FR|comp17433_c0_seq1_2_7.1e-57</name>
                          <branch_length>1.756E-6</branch_length>
                        </clade>
                        <clade>
                          <name>07_Stephanoeca_diplocostata_AU|comp16921_c0_seq1_2_3.2e-50</name>
                          <branch_length>0.002564331</branch_length>
                        </clade>
                      </clade>
                    </clade>
                  </clade>
                </clade>
              </clade>
              <clade>
                <name>12_Salpingoeca_infusionum|comp15742_c1_seq1_2_1.4e-42</name>
                <branch_length>0.358691576</branch_length>
              </clade>
              <clade>
                <name>11_Choanoeca_perplexa|comp15208_c0_seq1_2_4.9e-57</name>
                <branch_length>0.411058701</branch_length>
              </clade>
              <clade>
                <name>16_Salpingoeca_dolichothecata|comp26261_c0_seq1_2_2.8e-58</name>
                <branch_length>0.513193404</branch_length>
              </clade>
              <clade>
                <branch_length>0.683930698</branch_length>
                <confidence type="unknown">86</confidence>
                <clade>
                  <name>49_Dictyostelium_discoideum|DDB0191169_3_1.7e-29</name>
                  <branch_length>0.515562609</branch_length>
                </clade>
                <clade>
                  <branch_length>0.115584857</branch_length>
                  <confidence type="unknown">100</confidence>
                  <clade>
                    <name>57_Tetrahymena_thermophila|3743_3_1.8e-41</name>
                    <branch_length>0.012658896</branch_length>
                  </clade>
                  <clade>
                    <name>57_Tetrahymena_thermophila|3703_2_5.1e-43</name>
                    <branch_length>0.029601032</branch_length>
                  </clade>
                </clade>
              </clade>
              <clade>
                <name>39_Tetranychus_urticae|tetur17g03340_3_2.4e-30</name>
                <branch_length>0.844158273</branch_length>
              </clade>
              <clade>
                <branch_length>0.343643363</branch_length>
                <confidence type="unknown">52</confidence>
                <clade>
                  <name>13_Microstomoeca_roanoka|comp12695_c0_seq1_2_1.3e-50</name>
                  <branch_length>0.061144669</branch_length>
                </clade>
                <clade>
                  <name>13_Microstomoeca_roanoka|comp14093_c0_seq1_3_1.6e-44</name>
                  <branch_length>0.478356021</branch_length>
                </clade>
                <clade>
                  <branch_length>0.073562755</branch_length>
                  <confidence type="unknown">61</confidence>
                  <clade>
                    <name>15_Hartaetosiga_balthica|comp9006_c0_seq1_2_1.4e-55</name>
                    <branch_length>0.06082927</branch_length>
                  </clade>
                  <clade>
                    <name>05_Hartaetosiga_gracilis|comp13216_c0_seq1_2_3.3e-55</name>
                    <branch_length>0.074028126</branch_length>
                  </clade>
                </clade>
                <clade>
                  <name>12_Salpingoeca_infusionum|comp15742_c2_seq1_3_4.9e-17</name>
                  <branch_length>0.11173834</branch_length>
                </clade>
              </clade>
              <clade>
                <branch_length>0.339480451</branch_length>
                <confidence type="unknown">87</confidence>
                <clade>
                  <name>21_Salpingoeca_rosetta|PTSG_04414T0_2_5.1e-66</name>
                  <branch_length>0.003967544</branch_length>
                </clade>
                <clade>
                  <name>21_Salpingoeca_rosetta|PTSG_11363T0_3_1.1e-62</name>
                  <branch_length>0.017169786</branch_length>
                </clade>
              </clade>
              <clade>
                <branch_length>0.244491671</branch_length>
                <confidence type="unknown">56</confidence>
                <clade>
                  <name>18_Salpingoeca_helianthica|comp15343_c0_seq2_3_1.7e-54</name>
                  <branch_length>0.080859429</branch_length>
                </clade>
                <clade>
                  <name>04_Salpingoeca_urceolata|comp20517_c0_seq1_2_1.3e-62</name>
                  <branch_length>0.083967527</branch_length>
                </clade>
              </clade>
              <clade>
                <name>19_Mylnosiga_fluctuans|comp10091_c0_seq1_2_1.9e-61</name>
                <branch_length>0.290059132</branch_length>
              </clade>
              <clade>
                <name>09_Salpingoeca_kvevrii|comp11129_c0_seq1_2_1.6e-58</name>
                <branch_length>0.297927741</branch_length>
              </clade>
              <clade>
                <name>48_Yarrowia_lipolytica|YALI0E00726g_2_5.6e-58</name>
                <branch_length>0.33218433</branch_length>
              </clade>
              <clade>
                <name>46_Schizosaccharomyces_pombe|SPBC26H8.07c.1_3_2.5e-27</name>
                <branch_length>0.759156695</branch_length>
              </clade>
              <clade>
                <name>48_Yarrowia_lipolytica|YALI0E26961g_3_2.9e-39</name>
                <branch_length>0.949138966</branch_length>
              </clade>
            </clade>
          </clade>
        </clade>
      </clade>
      <clade>
        <branch_length>0.721755472</branch_length>
        <confidence type="unknown">98</confidence>
        <clade>
          <name>50_Acanthamoeba_castellanii|ACA1_231290_1_3.8e-205</name>
          <branch_length>0.213236163</branch_length>
        </clade>
        <clade>
          <branch_length>0.270819091</branch_length>
          <confidence type="unknown">100</confidence>
          <clade>
            <name>50_Acanthamoeba_castellanii|ACA1_095040_2_8e-190</name>
            <branch_length>0.038240697</branch_length>
          </clade>
          <clade>
            <name>50_Acanthamoeba_castellanii|ACA1_188210_3_5.4e-140</name>
            <branch_length>0.192963356</branch_length>
          </clade>
        </clade>
      </clade>
      <clade>
        <branch_length>0.652753991</branch_length>
        <confidence type="unknown">100</confidence>
        <clade>
          <name>55_Emiliania_huxleyi|416424_1_1.5e-240</name>
          <branch_length>0.018518952</branch_length>
        </clade>
        <clade>
          <branch_length>0.039794591</branch_length>
          <confidence type="unknown">100</confidence>
          <clade>
            <name>55_Emiliania_huxleyi|315782_3_1.6e-240</name>
            <branch_length>1.756E-6</branch_length>
          </clade>
          <clade>
            <name>55_Emiliania_huxleyi|311254_2_1.6e-240</name>
            <branch_length>1.756E-6</branch_length>
          </clade>
        </clade>
      </clade>
      <clade>
        <branch_length>0.570350861</branch_length>
        <confidence type="unknown">100</confidence>
        <clade>
          <name>52_Chlamydomonas_reinhardtii|Cre03.g190950.t1.2_2_3.3e-267</name>
          <branch_length>0.010141266</branch_length>
        </clade>
        <clade>
          <name>52_Chlamydomonas_reinhardtii|g4512.t1_1_4.9e-269</name>
          <branch_length>0.015580645</branch_length>
        </clade>
      </clade>
      <clade>
        <branch_length>1.007999692</branch_length>
        <confidence type="unknown">100</confidence>
        <clade>
          <name>53_Chondrus_crispus|546307346_2_2.7e-169</name>
          <branch_length>0.34349701</branch_length>
        </clade>
        <clade>
          <name>53_Chondrus_crispus|546318385_1_1.6e-197</name>
          <branch_length>0.081157752</branch_length>
        </clade>
      </clade>
      <clade>
        <branch_length>0.738702416</branch_length>
        <confidence type="unknown">63</confidence>
        <clade>
          <name>58_Bigelowiella_natans|43260_3_7.6e-178</name>
          <branch_length>0.400901309</branch_length>
        </clade>
        <clade>
          <branch_length>0.214882871</branch_length>
          <confidence type="unknown">100</confidence>
          <clade>
            <name>51_Arabidopsis_thaliana|AT4G14960.2_3_4.9e-214</name>
            <branch_length>0.029204743</branch_length>
          </clade>
          <clade>
            <branch_length>0.009104207</branch_length>
            <confidence type="unknown">56</confidence>
            <clade>
              <name>51_Arabidopsis_thaliana|AT1G04820.1_1_1.7e-218</name>
              <branch_length>0.017982208</branch_length>
            </clade>
            <clade>
              <name>51_Arabidopsis_thaliana|AT1G50010.1_2_2.1e-218</name>
              <branch_length>0.026308874</branch_length>
            </clade>
          </clade>
        </clade>
        <clade>
          <name>57_Tetrahymena_thermophila|3735_1_2.8e-228</name>
          <branch_length>0.321923403</branch_length>
        </clade>
        <clade>
          <branch_length>0.74064242</branch_length>
          <confidence type="unknown">100</confidence>
          <clade>
            <name>49_Dictyostelium_discoideum|DDB0191380_1_2.4e-110</name>
            <branch_length>0.234807983</branch_length>
          </clade>
          <clade>
            <name>49_Dictyostelium_discoideum|DDB0306347_2_1e-71</name>
            <branch_length>0.487690181</branch_length>
          </clade>
        </clade>
        <clade>
          <branch_length>0.349474893</branch_length>
          <confidence type="unknown">100</confidence>
          <clade>
            <name>54_Naegleria_gruberi|39221_2_6.8e-193</name>
            <branch_length>0.002419397</branch_length>
          </clade>
          <clade>
            <branch_length>0.002121566</branch_length>
            <confidence type="unknown">76</confidence>
            <clade>
              <name>54_Naegleria_gruberi|56236_1_5e-193</name>
              <branch_length>0.00270759</branch_length>
            </clade>
            <clade>
              <name>54_Naegleria_gruberi|56065_3_1e-192</name>
              <branch_length>0.002711707</branch_length>
            </clade>
          </clade>
        </clade>
      </clade>
      <clade>
        <branch_length>0.717376281</branch_length>
        <confidence type="unknown">98</confidence>
        <clade>
          <name>58_Bigelowiella_natans|48500_1_2.1e-248</name>
          <branch_length>0.019729327</branch_length>
        </clade>
        <clade>
          <name>58_Bigelowiella_natans|50886_2_1.7e-244</name>
          <branch_length>0.062530883</branch_length>
        </clade>
      </clade>
      <clade>
        <name>56_Guillardia_theta|150769_1_3.4e-255</name>
        <branch_length>0.729682023</branch_length>
      </clade>
      <clade>
        <name>59_Thalassiosira_pseudonana|29304_1_2.7e-250</name>
        <branch_length>0.795661255</branch_length>
      </clade>
      <clade>
        <branch_length>0.219827628</branch_length>
        <confidence type="unknown">67</confidence>
        <clade>
          <branch_length>0.151031866</branch_length>
          <confidence type="unknown">100</confidence>
          <clade>
            <name>22_Oscarella_pearsei|comp36438_c0_seq5_2_1.8e-246</name>
            <branch_length>0.048191431</branch_length>
          </clade>
          <clade>
            <name>22_Oscarella_pearsei|comp36648_c1_seq2_1_8.6e-268</name>
            <branch_length>0.034571972</branch_length>
          </clade>
        </clade>
        <clade>
          <branch_length>0.08452918</branch_length>
          <confidence type="unknown">99</confidence>
          <clade>
            <name>28_Acropora_digitifera|10875_2_4.7e-223</name>
            <branch_length>0.135276533</branch_length>
          </clade>
          <clade>
            <name>28_Acropora_digitifera|20436_1_1.3e-259</name>
            <branch_length>0.262317825</branch_length>
          </clade>
        </clade>
      </clade>
      <clade>
        <branch_length>0.264953394</branch_length>
        <confidence type="unknown">100</confidence>
        <clade>
          <name>27_Nematostella_vectensis|188665_1_6.8e-291</name>
          <branch_length>0.001152503</branch_length>
        </clade>
        <clade>
          <branch_length>0.013554419</branch_length>
          <confidence type="unknown">66</confidence>
          <clade>
            <name>27_Nematostella_vectensis|244590_3_5.1e-288</name>
            <branch_length>0.024004524</branch_length>
          </clade>
          <clade>
            <name>27_Nematostella_vectensis|188669_2_4.1e-289</name>
            <branch_length>0.035827527</branch_length>
          </clade>
        </clade>
      </clade>
    </clade>
    <clade>
      <name>30_Ciona_intestinalis|ENSCINT00000011748_3_1.1e-260</name>
      <branch_length>0.198885756</branch_length>
    </clade>
  </clade>
</phylogeny>
<phylogeny rooted="false" rerootable="true">
  <name>beta_tubulin</name>
  <clade>
    <clade>
      <name>34_Strongylocentrotus_purpuratus|390340851_3_0</name>
      <branch_length>0.177451473</branch_length>
    </clade>
    <clade>
      <branch_length>0.095979335</branch_length>
      <confidence type="unknown">93</confidence>
      <clade>
        <name>32_Mus_musculus|226958566_3_0</name>
        <branch_length>0.173449627</branch_length>
      </clade>
      <clade>
        <branch_length>0.034498432</branch_length>
        <confidence type="unknown">53</confidence>
        <clade>
          <branch_length>0.1189158</branch_length>
          <confidence type="unknown">100</confidence>
          <clade>
            <name>32_Mus_musculus|255958180_2_0</name>
            <branch_length>0.020747205</branch_length>
          </clade>
          <clade>
            <name>32_Mus_musculus|142378376_1_0</name>
            <branch_length>0.025581331</branch_length>
          </clade>
        </clade>
        <clade>
          <name>31_Gasterosteus_aculeatus|ENSGACT00000016810_3_0</name>
          <branch_length>0.148454798</branch_length>
        </clade>
        <clade>
          <name>31_Gasterosteus_aculeatus|ENSGACT00000024993_1_0</name>
          <branch_length>0.14215019</branch_length>
        </clade>
        <clade>
          <name>31_Gasterosteus_aculeatus|ENSGACT00000004595_2_0</name>
          <branch_length>0.191420591</branch_length>
        </clade>
      </clade>
    </clade>
    <clade>
      <branch_length>0.166954739</branch_length>
      <confidence type="unknown">95</confidence>
      <clade>
        <name>41_Capitella_teleta|214108_2_0</name>
        <branch_length>0.109590897</branch_length>
      </clade>
      <clade>
        <branch_length>0.03133771</branch_length>
        <confidence type="unknown">94</confidence>
        <clade>
          <name>41_Capitella_teleta|156132_3_0</name>
          <branch_length>0.050813397</branch_length>
        </clade>
        <clade>
          <name>41_Capitella_teleta|163496_1_0</name>
          <branch_length>0.046139023</branch_length>
        </clade>
      </clade>
    </clade>
    <clade>
      <branch_length>0.159242899</branch_length>
      <confidence type="unknown">92</confidence>
      <clade>
        <branch_length>0.099137331</branch_length>
        <confidence type="unknown">100</confidence>
        <clade>
          <name>38_Drosophila_melanogaster|FBtr0086536_1_0</name>
          <branch_length>1.749E-6</branch_length>
        </clade>
        <clade>
          <name>38_Drosophila_melanogaster|FBtr0086537_2_0</name>
          <branch_length>0.031517272</branch_length>
        </clade>
      </clade>
      <clade>
        <name>38_Drosophila_melanogaster|FBtr0082046_3_0</name>
        <branch_length>0.228889982</branch_length>
      </clade>
    </clade>
    <clade>
      <branch_length>0.22912295</branch_length>
      <confidence type="unknown">100</confidence>
      <clade>
        <name>20_Monosiga_brevicollis|31534_2_0</name>
        <branch_length>0.001964619</branch_length>
      </clade>
      <clade>
        <name>20_Monosiga_brevicollis|14310_1_0</name>
        <branch_length>0.005687234</branch_length>
      </clade>
    </clade>
    <clade>
      <branch_length>0.262201775</branch_length>
      <confidence type="unknown">76</confidence>
      <clade>
        <name>03_Salpingoeca_punica|comp14125_c0_seq1_1_0</name>
        <branch_length>0.010917407</branch_length>
      </clade>
      <clade>
        <branch_length>0.043563927</branch_length>
        <confidence type="unknown">77</confidence>
        <clade>
          <name>17_Codosiga_hollandica|comp58471_c0_seq1_2_4.1e-133</name>
          <branch_length>0.045146183</branch_length>
        </clade>
        <clade>
          <name>06_Salpingoeca_macrocollata|comp22768_c2_seq2_1_0</name>
          <branch_length>0.128064604</branch_length>
        </clade>
      </clade>
    </clade>
    <clade>
      <branch_length>0.51275152</branch_length>
      <confidence type="unknown">96</confidence>
      <clade>
        <name>58_Bigelowiella_natans|77054_3_6.7e-296</name>
        <branch_length>0.349125193</branch_length>
      </clade>
      <clade>
        <branch_length>0.092803554</branch_length>
        <confidence type="unknown">100</confidence>
        <clade>
          <name>58_Bigelowiella_natans|50422_1_0</name>
          <branch_length>0.053851697</branch_length>
        </clade>
        <clade>
          <name>58_Bigelowiella_natans|92827_2_0</name>
          <branch_length>0.03374384</branch_length>
        </clade>
      </clade>
    </clade>
    <clade>
      <branch_length>0.46497145</branch_length>
      <confidence type="unknown">59</confidence>
      <clade>
        <branch_length>0.071400034</branch_length>
        <confidence type="unknown">96</confidence>
        <clade>
          <name>56_Guillardia_theta|155883_2_0</name>
          <branch_length>0.237374655</branch_length>
        </clade>
        <clade>
          <name>56_Guillardia_theta|97098_1_0</name>
          <branch_length>0.108945741</branch_length>
        </clade>
      </clade>
      <clade>
        <branch_length>0.117864185</branch_length>
        <confidence type="unknown">97</confidence>
        <clade>
          <name>59_Thalassiosira_pseudonana|8069_1_3.2e-303</name>
          <branch_length>0.154918841</branch_length>
        </clade>
        <clade>
          <name>59_Thalassiosira_pseudonana|31569_2_4.3e-254</name>
          <branch_length>0.486566701</branch_length>
        </clade>
      </clade>
    </clade>
    <clade>
      <branch_length>0.459682199</branch_length>
      <confidence type="unknown">100</confidence>
      <clade>
        <name>55_Emiliania_huxleyi|451245_2_0</name>
        <branch_length>0.017574665</branch_length>
      </clade>
      <clade>
        <branch_length>0.009122202</branch_length>
        <confidence type="unknown">89</confidence>
        <clade>
          <name>55_Emiliania_huxleyi|110141_3_0</name>
          <branch_length>0.002980738</branch_length>
        </clade>
        <clade>
          <name>55_Emiliania_huxleyi|464996_1_0</name>
          <branch_length>1.749E-6</branch_length>
        </clade>
      </clade>
    </clade>
    <clade>
      <branch_length>0.700377855</branch_length>
      <confidence type="unknown">100</confidence>
      <clade>
        <name>51_Arabidopsis_thaliana|AT2G29550.1_3_8.3e-285</name>
        <branch_length>0.148879804</branch_length>
      </clade>
      <clade>
        <branch_length>0.110495184</branch_length>
        <confidence type="unknown">100</confidence>
        <clade>
          <name>51_Arabidopsis_thaliana|AT5G62690.1_2_1.1e-285</name>
          <branch_length>0.016502425</branch_length>
        </clade>
        <clade>
          <name>51_Arabidopsis_thaliana|AT5G62700.1_1_2.5e-286</name>
          <branch_length>0.014472203</branch_length>
        </clade>
      </clade>
    </clade>
    <clade>
      <branch_length>0.427214858</branch_length>
      <confidence type="unknown">100</confidence>
      <clade>
        <name>52_Chlamydomonas_reinhardtii|Cre12.g542250.t1.1_2_0</name>
        <branch_length>0.010523589</branch_length>
      </clade>
      <clade>
        <name>52_Chlamydomonas_reinhardtii|Cre12.g549550.t1.2_1_0</name>
        <branch_length>0.007692779</branch_length>
      </clade>
    </clade>
    <clade>
      <name>47_Homolaphlyctis_polyrhiza|hpol2312_1_0</name>
      <branch_length>0.421243269</branch_length>
    </clade>
    <clade>
      <name>44_Coprinopsis_cinerea|CC1G_04743T0_1_0</name>
      <branch_length>0.588063975</branch_length>
    </clade>
    <clade>
      <name>47_Homolaphlyctis_polyrhiza|hpol3456_2_1e-255</name>
      <branch_length>0.974660419</branch_length>
    </clade>
    <clade>
      <branch_length>0.522000833</branch_length>
      <confidence type="unknown">100</confidence>
      <clade>
        <name>43_Capsaspora_owczarzaki|CAOG_03516T0_2_0</name>
        <branch_length>0.059721493</branch_length>
      </clade>
      <clade>
        <name>43_Capsaspora_owczarzaki|CAOG_03517T0_1_0</name>
        <branch_length>0.039153489</branch_length>
      </clade>
    </clade>
    <clade>
      <branch_length>0.475450318</branch_length>
      <confidence type="unknown">64</confidence>
      <clade>
        <name>48_Yarrowia_lipolytica|YALI0E26961g_2_1.3e-194</name>
        <branch_length>0.862299841</branch_length>
      </clade>
      <clade>
        <name>48_Yarrowia_lipolytica|YALI0E00726g_1_1.1e-287</name>
        <branch_length>0.279150321</branch_length>
      </clade>
    </clade>
    <clade>
      <branch_length>0.479114267</branch_length>
      <confidence type="unknown">74</confidence>
      <clade>
        <name>50_Acanthamoeba_castellanii|ACA1_382680_1_0</name>
        <branch_length>0.193665693</branch_length>
      </clade>
      <clade>
        <name>50_Acanthamoeba_castellanii|ACA1_082570_2_6.1e-252</name>
        <branch_length>0.458287407</branch_length>
      </clade>
    </clade>
    <clade>
      <branch_length>0.685520956</branch_length>
      <confidence type="unknown">89</confidence>
      <clade>
        <name>53_Chondrus_crispus|546310466_1_6e-235</name>
        <branch_length>0.46484555</branch_length>
      </clade>
      <clade>
        <branch_length>0.610401214</branch_length>
        <confidence type="unknown">100</confidence>
        <clade>
          <name>53_Chondrus_crispus|510241_3_1.3e-198</name>
          <branch_length>1.749E-6</branch_length>
        </clade>
        <clade>
          <name>53_Chondrus_crispus|546314780_2_1.3e-198</name>
          <branch_length>1.749E-6</branch_length>
        </clade>
      </clade>
    </clade>
    <clade>
      <branch_length>0.989565558</branch_length>
      <confidence type="unknown">74</confidence>
      <clade>
        <name>02_Acanthoeca_spectabilis|comp29431_c0_seq1_2_3.4e-111</name>
        <branch_length>2.0032602</branch_length>
      </clade>
      <clade>
        <branch_length>0.348899917</branch_length>
        <confidence type="unknown">70</confidence>
        <clade>
          <branch_length>1.748043983</branch_length>
          <confidence type="unknown">100</confidence>
          <clade>
            <name>49_Dictyostelium_discoideum|DDB0191380_2_1.9e-38</name>
            <branch_length>0.916423209</branch_length>
          </clade>
          <clade>
            <branch_length>0.16353554</branch_length>
            <confidence type="unknown">57</confidence>
            <clade>
              <name>50_Acanthamoeba_castellanii|ACA1_231290_3_5.7e-99</name>
              <branch_length>0.356672819</branch_length>
            </clade>
            <clade>
              <branch_length>0.144694567</branch_length>
              <confidence type="unknown">89</confidence>
              <clade>
                <branch_length>0.020188669</branch_length>
                <confidence type="unknown">78</confidence>
                <clade>
                  <name>52_Chlamydomonas_reinhardtii|g4512.t1_3_1.9e-105</name>
                  <branch_length>0.110509971</branch_length>
                </clade>
                <clade>
                  <branch_length>0.076552436</branch_length>
                  <confidence type="unknown">94</confidence>
                  <clade>
                    <name>59_Thalassiosira_pseudonana|29304_3_2.4e-87</name>
                    <branch_length>0.223367383</branch_length>
                  </clade>
                  <clade>
                    <name>56_Guillardia_theta|150769_3_3.6e-103</name>
                    <branch_length>0.171958936</branch_length>
                  </clade>
                </clade>
              </clade>
              <clade>
                <branch_length>0.069794316</branch_length>
                <confidence type="unknown">90</confidence>
                <clade>
                  <branch_length>0.071128739</branch_length>
                  <confidence type="unknown">64</confidence>
                  <clade>
                    <branch_length>0.030350391</branch_length>
                    <confidence type="unknown">59</confidence>
                    <clade>
                      <branch_length>0.047743142</branch_length>
                      <confidence type="unknown">73</confidence>
                      <clade>
                        <name>11_Choanoeca_perplexa|comp14643_c0_seq1_2_1.1e-95</name>
                        <branch_length>0.112498842</branch_length>
                      </clade>
                      <clade>
                        <name>16_Salpingoeca_dolichothecata|comp26822_c0_seq1_2_3.3e-93</name>
                        <branch_length>0.088057799</branch_length>
                      </clade>
                    </clade>
                    <clade>
                      <branch_length>0.063523613</branch_length>
                      <confidence type="unknown">100</confidence>
                      <clade>
                        <branch_length>0.064415215</branch_length>
                        <confidence type="unknown">100</confidence>
                        <clade>
                          <name>15_Hartaetosiga_balthica|comp6727_c0_seq1_2_3.4e-87</name>
                          <branch_length>0.083159992</branch_length>
                        </clade>
                        <clade>
                          <name>05_Hartaetosiga_gracilis|comp9829_c0_seq1_2_1.8e-88</name>
                          <branch_length>0.045662768</branch_length>
                        </clade>
                      </clade>
                      <clade>
                        <name>12_Salpingoeca_infusionum|comp16186_c0_seq1_3_1.5e-104</name>
                        <branch_length>0.05029559</branch_length>
                      </clade>
                    </clade>
                  </clade>
                  <clade>
                    <name>20_Monosiga_brevicollis|17634_3_1.4e-110</name>
                    <branch_length>0.048793457</branch_length>
                  </clade>
                </clade>
                <clade>
                  <name>19_Mylnosiga_fluctuans|comp9962_c0_seq1_2_1.4e-97</name>
                  <branch_length>0.096887232</branch_length>
                </clade>
                <clade>
                  <branch_length>0.115821099</branch_length>
                  <confidence type="unknown">93</confidence>
                  <clade>
                    <branch_length>0.047827401</branch_length>
                    <confidence type="unknown">85</confidence>
                    <clade>
                      <branch_length>0.060169398</branch_length>
                      <confidence type="unknown">94</confidence>
                      <clade>
                        <name>01_Diaphanoeca_grandis|comp32564_c0_seq1_2_6.8e-87</name>
                        <branch_length>0.073034922</branch_length>
                      </clade>
                      <clade>
                        <name>10_Didymoeca_costata|comp16601_c0_seq1_2_2.7e-81</name>
                        <branch_length>0.136360577</branch_length>
                      </clade>
                    </clade>
                    <clade>
                      <branch_length>0.09409287</branch_length>
                      <confidence type="unknown">100</confidence>
                      <clade>
                        <name>07_Stephanoeca_diplocostata_AU|comp16426_c0_seq1_3_4.6e-74</name>
                        <branch_length>1.749E-6</branch_length>
                      </clade>
                      <clade>
                        <name>07_Stephanoeca_diplocostata_FR|comp17006_c0_seq1_2_6.6e-93</name>
                        <branch_length>1.749E-6</branch_length>
                      </clade>
                    </clade>
                  </clade>
                  <clade>
                    <branch_length>0.021831409</branch_length>
                    <confidence type="unknown">84</confidence>
                    <clade>
                      <name>08_Helgoeca_nana|comp9851_c0_seq1_2_1.3e-68</name>
                      <branch_length>0.076777692</branch_length>
                    </clade>
                    <clade>
                      <name>14_Savillea_parva|comp11737_c0_seq1_2_3e-95</name>
                      <branch_length>0.033007666</branch_length>
                    </clade>
                  </clade>
                </clade>
                <clade>
                  <branch_length>0.052216505</branch_length>
                  <confidence type="unknown">52</confidence>
                  <clade>
                    <name>09_Salpingoeca_kvevrii|comp11123_c0_seq1_2_1.3e-104</name>
                    <branch_length>0.044459537</branch_length>
                  </clade>
                  <clade>
                    <name>04_Salpingoeca_urceolata|comp19007_c1_seq2_2_1.3e-86</name>
                    <branch_length>0.1113549</branch_length>
                  </clade>
                  <clade>
                    <branch_length>0.04534654</branch_length>
                    <confidence type="unknown">55</confidence>
                    <clade>
                      <name>18_Salpingoeca_helianthica|comp15266_c0_seq1_2_1.8e-106</name>
                      <branch_length>0.060957214</branch_length>
                    </clade>
                    <clade>
                      <branch_length>0.036394712</branch_length>
                      <confidence type="unknown">100</confidence>
                      <clade>
                        <name>03_Salpingoeca_punica|comp11355_c0_seq1_2_4.1e-111</name>
                        <branch_length>0.043788476</branch_length>
                      </clade>
                      <clade>
                        <name>06_Salpingoeca_macrocollata|comp5315_c0_seq1_2_3.4e-94</name>
                        <branch_length>0.085715577</branch_length>
                      </clade>
                    </clade>
                  </clade>
                </clade>
                <clade>
                  <branch_length>0.066099005</branch_length>
                  <confidence type="unknown">78</confidence>
                  <clade>
                    <name>43_Capsaspora_owczarzaki|CAOG_06901T0_3_1e-92</name>
                    <branch_length>0.166318971</branch_length>
                  </clade>
                  <clade>
                    <branch_length>0.093707471</branch_length>
                    <confidence type="unknown">90</confidence>
                    <clade>
                      <name>44_Coprinopsis_cinerea|CC1G_00146T0_3_2.5e-86</name>
                      <branch_length>0.387690614</branch_length>
                    </clade>
                    <clade>
                      <branch_length>0.092907383</branch_length>
                      <confidence type="unknown">89</confidence>
                      <clade>
                        <branch_length>0.39266125</branch_length>
                        <confidence type="unknown">100</confidence>
                        <clade>
                          <name>46_Schizosaccharomyces_pombe|SPBC800.05c.1_3_3.4e-38</name>
                          <branch_length>0.261617912</branch_length>
                        </clade>
                        <clade>
                          <name>46_Schizosaccharomyces_pombe|SPBC16A3.15c.1_2_8e-42</name>
                          <branch_length>0.273933776</branch_length>
                        </clade>
                      </clade>
                      <clade>
                        <name>48_Yarrowia_lipolytica|YALI0E19360g_3_7.7e-88</name>
                        <branch_length>0.251039754</branch_length>
                      </clade>
                    </clade>
                  </clade>
                </clade>
                <clade>
                  <branch_length>0.12343763</branch_length>
                  <confidence type="unknown">69</confidence>
                  <clade>
                    <branch_length>0.118566052</branch_length>
                    <confidence type="unknown">94</confidence>
                    <clade>
                      <name>30_Ciona_intestinalis|ENSCINT00000015767_3_8.2e-81</name>
                      <branch_length>0.085939585</branch_length>
                    </clade>
                    <clade>
                      <name>29_Trichoplax_adhaerens|54910_3_2.2e-52</name>
                      <branch_length>0.333749038</branch_length>
                    </clade>
                  </clade>
                  <clade>
                    <branch_length>0.067075204</branch_length>
                    <confidence type="unknown">75</confidence>
                    <clade>
                      <name>23_Ephydatia_muelleri|comp67422_c1_seq14_3_1.9e-79</name>
                      <branch_length>0.08793498</branch_length>
                    </clade>
                    <clade>
                      <name>24_Amphimedon_queenslandica|Aqu1.229186_3_5.9e-54</name>
                      <branch_length>0.580600488</branch_length>
                    </clade>
                  </clade>
                </clade>
                <clade>
                  <name>47_Homolaphlyctis_polyrhiza|hpol5148_3_3.1e-110</name>
                  <branch_length>0.114275658</branch_length>
                </clade>
              </clade>
            </clade>
          </clade>
        </clade>
        <clade>
          <branch_length>3.029925569</branch_length>
          <confidence type="unknown">100</confidence>
          <clade>
            <name>49_Dictyostelium_discoideum|DDB0185068_3_1.6e-14</name>
            <branch_length>0.749716222</branch_length>
          </clade>
          <clade>
            <branch_length>0.319622058</branch_length>
            <confidence type="unknown">79</confidence>
            <clade>
              <branch_length>0.378195859</branch_length>
              <confidence type="unknown">99</confidence>
              <clade>
                <name>05_Hartaetosiga_gracilis|comp12059_c0_seq3_3_8e-22</name>
                <branch_length>0.367641654</branch_length>
              </clade>
              <clade>
                <name>15_Hartaetosiga_balthica|comp15200_c0_seq1_3_9.4e-40</name>
                <branch_length>0.272588364</branch_length>
              </clade>
            </clade>
            <clade>
              <branch_length>0.248378346</branch_length>
              <confidence type="unknown">73</confidence>
              <clade>
                <name>11_Choanoeca_perplexa|comp15368_c0_seq2_3_3.6e-46</name>
                <branch_length>0.336434045</branch_length>
              </clade>
              <clade>
                <branch_length>0.195357595</branch_length>
                <confidence type="unknown">77</confidence>
                <clade>
                  <branch_length>0.087227194</branch_length>
                  <confidence type="unknown">64</confidence>
                  <clade>
                    <branch_length>0.171571985</branch_length>
                    <confidence type="unknown">99</confidence>
                    <clade>
                      <name>07_Stephanoeca_diplocostata_FR|comp24295_c0_seq4_3_1.4e-43</name>
                      <branch_length>0.275752191</branch_length>
                    </clade>
                    <clade>
                      <branch_length>0.210497178</branch_length>
                      <confidence type="unknown">100</confidence>
                      <clade>
                        <name>14_Savillea_parva|comp2721_c0_seq1_3_1.7e-34</name>
                        <branch_length>0.229954984</branch_length>
                      </clade>
                      <clade>
                        <name>08_Helgoeca_nana|comp12321_c0_seq1_3_5.9e-42</name>
                        <branch_length>0.295851195</branch_length>
                      </clade>
                    </clade>
                  </clade>
                  <clade>
                    <name>09_Salpingoeca_kvevrii|comp3779_c0_seq1_3_7.5e-58</name>
                    <branch_length>0.418320523</branch_length>
                  </clade>
                  <clade>
                    <branch_length>0.158008799</branch_length>
                    <confidence type="unknown">78</confidence>
                    <clade>
                      <name>06_Salpingoeca_macrocollata|comp16499_c0_seq2_3_1.9e-57</name>
                      <branch_length>0.234599247</branch_length>
                    </clade>
                    <clade>
                      <name>03_Salpingoeca_punica|comp12950_c0_seq1_3_2.1e-58</name>
                      <branch_length>0.165494119</branch_length>
                    </clade>
                  </clade>
                  <clade>
                    <name>19_Mylnosiga_fluctuans|comp13334_c0_seq1_3_6.8e-56</name>
                    <branch_length>0.406216567</branch_length>
                  </clade>
                </clade>
                <clade>
                  <name>04_Salpingoeca_urceolata|comp14881_c0_seq2_3_2.1e-41</name>
                  <branch_length>0.689923517</branch_length>
                </clade>
              </clade>
            </clade>
          </clade>
        </clade>
      </clade>
    </clade>
    <clade>
      <name>44_Coprinopsis_cinerea|CC1G_06184T0_2_6.5e-172</name>
      <branch_length>1.609228121</branch_length>
    </clade>
    <clade>
      <name>18_Salpingoeca_helianthica|comp15343_c0_seq2_1_0</name>
      <branch_length>0.348714323</branch_length>
    </clade>
    <clade>
      <name>04_Salpingoeca_urceolata|comp20517_c0_seq1_1_0</name>
      <branch_length>0.350187008</branch_length>
    </clade>
    <clade>
      <name>09_Salpingoeca_kvevrii|comp11129_c0_seq1_1_0</name>
      <branch_length>0.322551614</branch_length>
    </clade>
    <clade>
      <name>19_Mylnosiga_fluctuans|comp10091_c0_seq1_1_0</name>
      <branch_length>0.305766826</branch_length>
    </clade>
    <clade>
      <branch_length>0.254173772</branch_length>
      <confidence type="unknown">72</confidence>
      <clade>
        <name>11_Choanoeca_perplexa|comp15208_c0_seq1_1_0</name>
        <branch_length>0.078173297</branch_length>
      </clade>
      <clade>
        <name>16_Salpingoeca_dolichothecata|comp26261_c0_seq1_1_0</name>
        <branch_length>0.163269196</branch_length>
      </clade>
    </clade>
    <clade>
      <branch_length>0.27957166</branch_length>
      <confidence type="unknown">55</confidence>
      <clade>
        <name>02_Acanthoeca_spectabilis|comp52452_c0_seq1_3_3.1e-108</name>
        <branch_length>0.167084815</branch_length>
      </clade>
      <clade>
        <name>10_Didymoeca_costata|comp93367_c0_seq1_3_1.2e-30</name>
        <branch_length>0.368860833</branch_length>
      </clade>
      <clade>
        <name>01_Diaphanoeca_grandis|comp31510_c1_seq2_1_0</name>
        <branch_length>0.227165787</branch_length>
      </clade>
      <clade>
        <branch_length>0.173515206</branch_length>
        <confidence type="unknown">95</confidence>
        <clade>
          <name>07_Stephanoeca_diplocostata_AU|comp10141_c0_seq1_1_4.9e-290</name>
          <branch_length>0.413732228</branch_length>
        </clade>
        <clade>
          <branch_length>0.068588009</branch_length>
          <confidence type="unknown">99</confidence>
          <clade>
            <name>07_Stephanoeca_diplocostata_FR|comp17433_c0_seq1_1_0</name>
            <branch_length>1.749E-6</branch_length>
          </clade>
          <clade>
            <name>07_Stephanoeca_diplocostata_AU|comp16921_c0_seq1_2_4.7e-254</name>
            <branch_length>0.00258429</branch_length>
          </clade>
        </clade>
      </clade>
      <clade>
        <name>01_Diaphanoeca_grandis|comp32545_c4_seq1_3_1.5e-56</name>
        <branch_length>0.271519377</branch_length>
      </clade>
      <clade>
        <name>10_Didymoeca_costata|comp14424_c0_seq1_1_0</name>
        <branch_length>0.223361011</branch_length>
      </clade>
      <clade>
        <name>14_Savillea_parva|comp5816_c0_seq1_1_0</name>
        <branch_length>0.094332947</branch_length>
      </clade>
      <clade>
        <name>18_Salpingoeca_helianthica|comp681_c0_seq1_3_2e-54</name>
        <branch_length>0.191094616</branch_length>
      </clade>
      <clade>
        <branch_length>0.085721041</branch_length>
        <confidence type="unknown">74</confidence>
        <clade>
          <name>08_Helgoeca_nana|comp18017_c0_seq1_1_0</name>
          <branch_length>0.070994237</branch_length>
        </clade>
        <clade>
          <name>02_Acanthoeca_spectabilis|comp16528_c0_seq1_1_1.1e-232</name>
          <branch_length>0.053824402</branch_length>
        </clade>
      </clade>
    </clade>
    <clade>
      <name>12_Salpingoeca_infusionum|comp15742_c1_seq1_1_6.5e-208</name>
      <branch_length>0.273951425</branch_length>
    </clade>
    <clade>
      <branch_length>0.247473006</branch_length>
      <confidence type="unknown">69</confidence>
      <clade>
        <name>21_Salpingoeca_rosetta|PTSG_11363T0_2_0</name>
        <branch_length>0.016757548</branch_length>
      </clade>
      <clade>
        <branch_length>0.002778328</branch_length>
        <confidence type="unknown">79</confidence>
        <clade>
          <name>21_Salpingoeca_rosetta|PTSG_09516T0_3_0</name>
          <branch_length>0.002956161</branch_length>
        </clade>
        <clade>
          <name>21_Salpingoeca_rosetta|PTSG_04414T0_1_0</name>
          <branch_length>0.002864628</branch_length>
        </clade>
      </clade>
    </clade>
    <clade>
      <name>13_Microstomoeca_roanoka|comp12695_c0_seq1_1_0</name>
      <branch_length>0.326248338</branch_length>
    </clade>
    <clade>
      <name>12_Salpingoeca_infusionum|comp15742_c2_seq1_2_1.4e-149</name>
      <branch_length>0.364551806</branch_length>
    </clade>
    <clade>
      <branch_length>0.415799622</branch_length>
      <confidence type="unknown">92</confidence>
      <clade>
        <name>13_Microstomoeca_roanoka|comp14093_c0_seq1_3_6.5e-297</name>
        <branch_length>0.371627126</branch_length>
      </clade>
      <clade>
        <name>13_Microstomoeca_roanoka|comp16438_c6_seq3_2_0</name>
        <branch_length>0.328108935</branch_length>
      </clade>
    </clade>
    <clade>
      <branch_length>0.343025351</branch_length>
      <confidence type="unknown">73</confidence>
      <clade>
        <name>15_Hartaetosiga_balthica|comp9006_c0_seq1_1_0</name>
        <branch_length>0.063390003</branch_length>
      </clade>
      <clade>
        <name>05_Hartaetosiga_gracilis|comp13216_c0_seq1_1_0</name>
        <branch_length>0.073380135</branch_length>
      </clade>
    </clade>
    <clade>
      <branch_length>0.256092693</branch_length>
      <confidence type="unknown">56</confidence>
      <clade>
        <name>37_Daphnia_pulex|300845_2_0</name>
        <branch_length>0.206469551</branch_length>
      </clade>
      <clade>
        <name>37_Daphnia_pulex|302845_1_0</name>
        <branch_length>0.194419278</branch_length>
      </clade>
      <clade>
        <name>37_Daphnia_pulex|305638_3_0</name>
        <branch_length>0.280956979</branch_length>
      </clade>
    </clade>
    <clade>
      <branch_length>0.302427668</branch_length>
      <confidence type="unknown">99</confidence>
      <clade>
        <branch_length>0.065327304</branch_length>
        <confidence type="unknown">99</confidence>
        <clade>
          <name>36_Pristionchus_pacificus|PPA02894_2_0</name>
          <branch_length>0.07206163</branch_length>
        </clade>
        <clade>
          <name>36_Pristionchus_pacificus|PPA02893_1_0</name>
          <branch_length>0.043434534</branch_length>
        </clade>
      </clade>
      <clade>
        <branch_length>0.10852193</branch_length>
        <confidence type="unknown">100</confidence>
        <clade>
          <name>35_Caenorhabditis_elegans|K01G5.7_2_0</name>
          <branch_length>0.140043687</branch_length>
        </clade>
        <clade>
          <name>35_Caenorhabditis_elegans|C36_1_0</name>
          <branch_length>0.128700306</branch_length>
        </clade>
      </clade>
    </clade>
    <clade>
      <branch_length>0.161856746</branch_length>
      <confidence type="unknown">100</confidence>
      <clade>
        <name>33_Branchiostoma_floridae|96664_1_0</name>
        <branch_length>1.749E-6</branch_length>
      </clade>
      <clade>
        <branch_length>7.65486E-4</branch_length>
        <confidence type="unknown">56</confidence>
        <clade>
          <name>33_Branchiostoma_floridae|60807_2_0</name>
          <branch_length>0.004098139</branch_length>
        </clade>
        <clade>
          <name>33_Branchiostoma_floridae|96663_3_0</name>
          <branch_length>0.025321446</branch_length>
        </clade>
      </clade>
    </clade>
    <clade>
      <name>17_Codosiga_hollandica|comp58471_c1_seq1_1_6.9e-150</name>
      <branch_length>0.200699957</branch_length>
    </clade>
    <clade>
      <name>17_Codosiga_hollandica|comp58471_c2_seq1_3_2.3e-85</name>
      <branch_length>0.195804563</branch_length>
    </clade>
    <clade>
      <branch_length>0.099029021</branch_length>
      <confidence type="unknown">100</confidence>
      <clade>
        <name>34_Strongylocentrotus_purpuratus|390349561_2_0</name>
        <branch_length>0.003532969</branch_length>
      </clade>
      <clade>
        <name>34_Strongylocentrotus_purpuratus|390349563_1_0</name>
        <branch_length>0.003145316</branch_length>
      </clade>
    </clade>
    <clade>
      <name>30_Ciona_intestinalis|ENSCINT00000015540_1_0</name>
      <branch_length>0.233959857</branch_length>
    </clade>
    <clade>
      <branch_length>0.194468186</branch_length>
      <confidence type="unknown">98</confidence>
      <clade>
        <name>25_Mnemiopsis_leidyi|ML020045_1_0</name>
        <branch_length>0.098478056</branch_length>
      </clade>
      <clade>
        <branch_length>0.045748204</branch_length>
        <confidence type="unknown">85</confidence>
        <clade>
          <name>25_Mnemiopsis_leidyi|ML141755_2_0</name>
          <branch_length>0.053985172</branch_length>
        </clade>
        <clade>
          <name>25_Mnemiopsis_leidyi|ML24281_3_1.8e-293</name>
          <branch_length>0.216616549</branch_length>
        </clade>
      </clade>
    </clade>
    <clade>
      <name>23_Ephydatia_muelleri|comp64363_c0_seq3_2_0</name>
      <branch_length>0.384691601</branch_length>
    </clade>
    <clade>
      <name>16_Salpingoeca_dolichothecata|comp13269_c0_seq1_3_1.6e-80</name>
      <branch_length>0.691241895</branch_length>
    </clade>
    <clade>
      <name>23_Ephydatia_muelleri|comp64363_c0_seq4_1_0</name>
      <branch_length>0.436508712</branch_length>
    </clade>
    <clade>
      <branch_length>0.348598598</branch_length>
      <confidence type="unknown">100</confidence>
      <clade>
        <name>24_Amphimedon_queenslandica|Aqu1.227361_1_0</name>
        <branch_length>0.002148191</branch_length>
      </clade>
      <clade>
        <name>24_Amphimedon_queenslandica|Aqu1.227360_2_4e-211</name>
        <branch_length>0.122369639</branch_length>
      </clade>
    </clade>
    <clade>
      <branch_length>0.403817969</branch_length>
      <confidence type="unknown">76</confidence>
      <clade>
        <branch_length>0.423741018</branch_length>
        <confidence type="unknown">100</confidence>
        <clade>
          <name>22_Oscarella_pearsei|comp37699_c0_seq10_2_6.2e-239</name>
          <branch_length>1.749E-6</branch_length>
        </clade>
        <clade>
          <name>22_Oscarella_pearsei|comp37699_c0_seq13_3_7.5e-239</name>
          <branch_length>1.749E-6</branch_length>
        </clade>
      </clade>
      <clade>
        <name>22_Oscarella_pearsei|comp37658_c0_seq1_1_0</name>
        <branch_length>0.088443609</branch_length>
      </clade>
    </clade>
    <clade>
      <name>28_Acropora_digitifera|11690_1_2e-236</name>
      <branch_length>0.418868838</branch_length>
    </clade>
    <clade>
      <branch_length>0.526383589</branch_length>
      <confidence type="unknown">90</confidence>
      <clade>
        <name>49_Dictyostelium_discoideum|DDB0191169_1_1.6e-208</name>
        <branch_length>0.437586656</branch_length>
      </clade>
      <clade>
        <branch_length>0.053107687</branch_length>
        <confidence type="unknown">78</confidence>
        <clade>
          <branch_length>0.098546869</branch_length>
          <confidence type="unknown">100</confidence>
          <clade>
            <name>54_Naegleria_gruberi|83350_1_1.4e-267</name>
            <branch_length>0.009420419</branch_length>
          </clade>
          <clade>
            <branch_length>0.012542464</branch_length>
            <confidence type="unknown">88</confidence>
            <clade>
              <name>54_Naegleria_gruberi|55423_3_5.2e-263</name>
              <branch_length>0.018262516</branch_length>
            </clade>
            <clade>
              <name>54_Naegleria_gruberi|56391_2_9.8e-264</name>
              <branch_length>0.016812602</branch_length>
            </clade>
          </clade>
        </clade>
        <clade>
          <branch_length>0.13137247</branch_length>
          <confidence type="unknown">81</confidence>
          <clade>
            <name>57_Tetrahymena_thermophila|3703_1_5.4e-288</name>
            <branch_length>0.023421646</branch_length>
          </clade>
          <clade>
            <branch_length>0.016936466</branch_length>
            <confidence type="unknown">55</confidence>
            <clade>
              <name>57_Tetrahymena_thermophila|235_3_7.3e-113</name>
              <branch_length>1.348797386</branch_length>
            </clade>
            <clade>
              <name>57_Tetrahymena_thermophila|3743_2_4.4e-284</name>
              <branch_length>0.001741367</branch_length>
            </clade>
          </clade>
        </clade>
      </clade>
    </clade>
    <clade>
      <branch_length>0.525539563</branch_length>
      <confidence type="unknown">68</confidence>
      <clade>
        <name>46_Schizosaccharomyces_pombe|SPBC26H8.07c.1_1_1.6e-216</name>
        <branch_length>0.551636611</branch_length>
      </clade>
      <clade>
        <branch_length>0.207823445</branch_length>
        <confidence type="unknown">99</confidence>
        <clade>
          <name>45_Rhizopus_oryzae|RO3G_06267T0_2_2.1e-252</name>
          <branch_length>0.101267567</branch_length>
        </clade>
        <clade>
          <branch_length>0.057861071</branch_length>
          <confidence type="unknown">100</confidence>
          <clade>
            <name>45_Rhizopus_oryzae|RO3G_04451T0_1_1.2e-256</name>
            <branch_length>0.04629022</branch_length>
          </clade>
          <clade>
            <name>45_Rhizopus_oryzae|RO3G_11162T0_3_3.6e-251</name>
            <branch_length>0.052354076</branch_length>
          </clade>
        </clade>
      </clade>
    </clade>
    <clade>
      <branch_length>0.546766246</branch_length>
      <confidence type="unknown">76</confidence>
      <clade>
        <name>35_Caenorhabditis_elegans|B0272.1_3_0</name>
        <branch_length>0.232276577</branch_length>
      </clade>
      <clade>
        <name>36_Pristionchus_pacificus|PPA21757_3_4.6e-298</name>
        <branch_length>0.275383822</branch_length>
      </clade>
    </clade>
    <clade>
      <branch_length>0.602165446</branch_length>
      <confidence type="unknown">99</confidence>
      <clade>
        <branch_length>0.068421679</branch_length>
        <confidence type="unknown">100</confidence>
        <clade>
          <name>39_Tetranychus_urticae|tetur04g06360_1_2.3e-275</name>
          <branch_length>0.004256184</branch_length>
        </clade>
        <clade>
          <name>39_Tetranychus_urticae|tetur599g00010_2_2.5e-274</name>
          <branch_length>0.003203788</branch_length>
        </clade>
      </clade>
      <clade>
        <name>39_Tetranychus_urticae|tetur17g03340_3_2e-234</name>
        <branch_length>0.126359707</branch_length>
      </clade>
    </clade>
    <clade>
      <branch_length>0.508872513</branch_length>
      <confidence type="unknown">78</confidence>
      <clade>
        <name>42_Helobdella_robusta|186143_1_0</name>
        <branch_length>0.173693317</branch_length>
      </clade>
      <clade>
        <branch_length>0.070441138</branch_length>
        <confidence type="unknown">63</confidence>
        <clade>
          <name>42_Helobdella_robusta|93295_2_1.3e-279</name>
          <branch_length>0.181036381</branch_length>
        </clade>
        <clade>
          <name>42_Helobdella_robusta|186959_3_5.4e-269</name>
          <branch_length>0.316295409</branch_length>
        </clade>
      </clade>
    </clade>
    <clade>
      <branch_length>0.491199937</branch_length>
      <confidence type="unknown">76</confidence>
      <clade>
        <name>40_Lottia_gigantea|204297_1_0</name>
        <branch_length>0.102979056</branch_length>
      </clade>
      <clade>
        <branch_length>0.022313532</branch_length>
        <confidence type="unknown">52</confidence>
        <clade>
          <name>40_Lottia_gigantea|217729_3_0</name>
          <branch_length>0.113501855</branch_length>
        </clade>
        <clade>
          <name>40_Lottia_gigantea|223078_2_0</name>
          <branch_length>0.060550899</branch_length>
        </clade>
      </clade>
    </clade>
    <clade>
      <name>29_Trichoplax_adhaerens|63686_1_3.4e-303</name>
      <branch_length>0.543939423</branch_length>
    </clade>
    <clade>
      <name>30_Ciona_intestinalis|ENSCINT00000014333_2_6.5e-287</name>
      <branch_length>0.621669783</branch_length>
    </clade>
    <clade>
      <branch_length>0.690729162</branch_length>
      <confidence type="unknown">92</confidence>
      <clade>
        <name>29_Trichoplax_adhaerens|22309_2_1.3e-233</name>
        <branch_length>0.309242092</branch_length>
      </clade>
      <clade>
        <name>28_Acropora_digitifera|11689_2_1.2e-208</name>
        <branch_length>0.803515111</branch_length>
      </clade>
    </clade>
    <clade>
      <branch_length>0.564074602</branch_length>
      <confidence type="unknown">95</confidence>
      <clade>
        <name>26_Hydra_vulgaris|Hma2.229179_2_4.8e-278</name>
        <branch_length>0.160598593</branch_length>
      </clade>
      <clade>
        <branch_length>0.064534408</branch_length>
        <confidence type="unknown">100</confidence>
        <clade>
          <name>26_Hydra_vulgaris|Hma2.209093_3_1.8e-274</name>
          <branch_length>0.003807619</branch_length>
        </clade>
        <clade>
          <name>26_Hydra_vulgaris|Hma2.209092_1_4e-280</name>
          <branch_length>1.749E-6</branch_length>
        </clade>
      </clade>
    </clade>
    <clade>
      <name>27_Nematostella_vectensis|167737_3_0</name>
      <branch_length>0.307433783</branch_length>
    </clade>
    <clade>
      <name>27_Nematostella_vectensis|245773_2_0</name>
      <branch_length>0.323633122</branch_length>
    </clade>
    <clade>
      <name>28_Acropora_digitifera|15160_3_1.9e-133</name>
      <branch_length>0.875130503</branch_length>
    </clade>
    <clade>
      <name>27_Nematostella_vectensis|229095_1_0</name>
      <branch_length>0.34274652</branch_length>
    </clade>
  </clade>
</phylogeny>
<phylogeny rooted="false" rerootable="true">
  <name>EF1A</name>
  <clade>
    <clade>
      <name>40_Lottia_gigantea|239271_1_5.8e-174</name>
      <branch_length>0.194475748</branch_length>
    </clade>
    <clade>
      <branch_length>0.105275093</branch_length>
      <confidence type="unknown">51</confidence>
      <clade>
        <name>34_Strongylocentrotus_purpuratus|184186094_1_4.6e-185</name>
        <branch_length>0.172892699</branch_length>
      </clade>
      <clade>
        <branch_length>0.071066406</branch_length>
        <confidence type="unknown">73</confidence>
        <clade>
          <branch_length>0.026885936</branch_length>
          <confidence type="unknown">99</confidence>
          <clade>
            <name>33_Branchiostoma_floridae|58879_3_3.4e-219</name>
            <branch_length>0.072171807</branch_length>
          </clade>
          <clade>
            <branch_length>0.036401261</branch_length>
            <confidence type="unknown">100</confidence>
            <clade>
              <name>33_Branchiostoma_floridae|126207_2_1.5e-226</name>
              <branch_length>0.006476197</branch_length>
            </clade>
            <clade>
              <name>33_Branchiostoma_floridae|122567_1_1.9e-228</name>
              <branch_length>1.66E-6</branch_length>
            </clade>
          </clade>
        </clade>
        <clade>
          <branch_length>0.055320608</branch_length>
          <confidence type="unknown">73</confidence>
          <clade>
            <branch_length>0.06749442</branch_length>
            <confidence type="unknown">92</confidence>
            <clade>
              <name>32_Mus_musculus|31982852_2_9.1e-207</name>
              <branch_length>0.113082227</branch_length>
            </clade>
            <clade>
              <branch_length>0.126136922</branch_length>
              <confidence type="unknown">100</confidence>
              <clade>
                <name>32_Mus_musculus|126032328_1_5.3e-216</name>
                <branch_length>1.66E-6</branch_length>
              </clade>
              <clade>
                <name>32_Mus_musculus|126090591_3_5.2e-202</name>
                <branch_length>0.026811435</branch_length>
              </clade>
            </clade>
          </clade>
          <clade>
            <branch_length>0.0452357</branch_length>
            <confidence type="unknown">98</confidence>
            <clade>
              <name>31_Gasterosteus_aculeatus|ENSGACT00000002842_3_1.8e-226</name>
              <branch_length>0.049389031</branch_length>
            </clade>
            <clade>
              <branch_length>0.038753474</branch_length>
              <confidence type="unknown">100</confidence>
              <clade>
                <name>31_Gasterosteus_aculeatus|ENSGACT00000002834_2_6.6e-232</name>
                <branch_length>0.017245864</branch_length>
              </clade>
              <clade>
                <name>31_Gasterosteus_aculeatus|ENSGACT00000002893_1_3.6e-233</name>
                <branch_length>0.022546323</branch_length>
              </clade>
            </clade>
          </clade>
        </clade>
        <clade>
          <branch_length>0.150955819</branch_length>
          <confidence type="unknown">100</confidence>
          <clade>
            <name>41_Capitella_teleta|148876_1_1.7e-224</name>
            <branch_length>0.001345921</branch_length>
          </clade>
          <clade>
            <name>41_Capitella_teleta|149613_2_1e-149</name>
            <branch_length>0.0045046</branch_length>
          </clade>
        </clade>
        <clade>
          <branch_length>0.109405467</branch_length>
          <confidence type="unknown">87</confidence>
          <clade>
            <branch_length>0.044444348</branch_length>
            <confidence type="unknown">98</confidence>
            <clade>
              <name>38_Drosophila_melanogaster|FBtr0085834_3_7.6e-209</name>
              <branch_length>0.146418291</branch_length>
            </clade>
            <clade>
              <branch_length>0.051362293</branch_length>
              <confidence type="unknown">100</confidence>
              <clade>
                <name>38_Drosophila_melanogaster|FBtr0331927_2_1.6e-222</name>
                <branch_length>1.66E-6</branch_length>
              </clade>
              <clade>
                <name>38_Drosophila_melanogaster|FBtr0088035_1_1.4e-222</name>
                <branch_length>1.66E-6</branch_length>
              </clade>
            </clade>
          </clade>
          <clade>
            <branch_length>0.101594801</branch_length>
            <confidence type="unknown">100</confidence>
            <clade>
              <name>37_Daphnia_pulex|300308_2_2.3e-216</name>
              <branch_length>0.043632986</branch_length>
            </clade>
            <clade>
              <name>37_Daphnia_pulex|300259_1_2.6e-221</name>
              <branch_length>0.012004562</branch_length>
            </clade>
          </clade>
        </clade>
        <clade>
          <branch_length>0.152437813</branch_length>
          <confidence type="unknown">99</confidence>
          <clade>
            <name>18_Salpingoeca_helianthica|comp15617_c0_seq1_1_9.3e-240</name>
            <branch_length>0.081832212</branch_length>
          </clade>
          <clade>
            <name>19_Mylnosiga_fluctuans|comp10164_c0_seq1_1_1.3e-245</name>
            <branch_length>0.042258323</branch_length>
          </clade>
        </clade>
        <clade>
          <branch_length>0.188172336</branch_length>
          <confidence type="unknown">100</confidence>
          <clade>
            <name>43_Capsaspora_owczarzaki|CAOG_07807T0_1_2.3e-231</name>
            <branch_length>1.66E-6</branch_length>
          </clade>
          <clade>
            <name>43_Capsaspora_owczarzaki|CAOG_09985T0_2_2.8e-184</name>
            <branch_length>8.77696E-4</branch_length>
          </clade>
        </clade>
        <clade>
          <branch_length>0.201942847</branch_length>
          <confidence type="unknown">100</confidence>
          <clade>
            <name>36_Pristionchus_pacificus|PPA26170_1_6.3e-221</name>
            <branch_length>0.030222745</branch_length>
          </clade>
          <clade>
            <branch_length>0.078994191</branch_length>
            <confidence type="unknown">100</confidence>
            <clade>
              <branch_length>0.033235737</branch_length>
              <confidence type="unknown">100</confidence>
              <clade>
                <name>35_Caenorhabditis_elegans|R03G5.1d_3_2.1e-168</name>
                <branch_length>1.66E-6</branch_length>
              </clade>
              <clade>
                <name>35_Caenorhabditis_elegans|R03G5.1a_1_1.2e-203</name>
                <branch_length>7.76198E-4</branch_length>
              </clade>
            </clade>
            <clade>
              <name>35_Caenorhabditis_elegans|F31E3.5_2_1.2e-201</name>
              <branch_length>0.019537228</branch_length>
            </clade>
          </clade>
        </clade>
        <clade>
          <branch_length>0.18143652</branch_length>
          <confidence type="unknown">58</confidence>
          <clade>
            <branch_length>0.191356711</branch_length>
            <confidence type="unknown">100</confidence>
            <clade>
              <name>51_Arabidopsis_thaliana|AT1G07920.1_1_8e-177</name>
              <branch_length>1.66E-6</branch_length>
            </clade>
            <clade>
              <branch_length>0.002146645</branch_length>
              <confidence type="unknown">91</confidence>
              <clade>
                <name>51_Arabidopsis_thaliana|AT1G07940.2_3_1.1e-176</name>
                <branch_length>1.66E-6</branch_length>
              </clade>
              <clade>
                <name>51_Arabidopsis_thaliana|AT1G07940.1_2_8.5e-177</name>
                <branch_length>1.66E-6</branch_length>
              </clade>
            </clade>
          </clade>
          <clade>
            <name>25_Mnemiopsis_leidyi|ML20395_1_2.5e-160</name>
            <branch_length>0.225212984</branch_length>
          </clade>
        </clade>
        <clade>
          <branch_length>0.169996659</branch_length>
          <confidence type="unknown">80</confidence>
          <clade>
            <name>44_Coprinopsis_cinerea|CC1G_06744T0_1_3.3e-210</name>
            <branch_length>0.096777955</branch_length>
          </clade>
          <clade>
            <branch_length>0.068099502</branch_length>
            <confidence type="unknown">63</confidence>
            <clade>
              <branch_length>0.082617967</branch_length>
              <confidence type="unknown">100</confidence>
              <clade>
                <branch_length>0.007416279</branch_length>
                <confidence type="unknown">57</confidence>
                <clade>
                  <name>45_Rhizopus_oryzae|RO3G_10090T0_3_1.2e-192</name>
                  <branch_length>0.012151381</branch_length>
                </clade>
                <clade>
                  <name>45_Rhizopus_oryzae|RO3G_11153T0_2_2.8e-193</name>
                  <branch_length>0.004158787</branch_length>
                </clade>
              </clade>
              <clade>
                <name>45_Rhizopus_oryzae|RO3G_15047T0_1_1.9e-195</name>
                <branch_length>0.005563553</branch_length>
              </clade>
            </clade>
            <clade>
              <branch_length>0.093086692</branch_length>
              <confidence type="unknown">100</confidence>
              <clade>
                <name>46_Schizosaccharomyces_pombe|SPAC23A1.10.1_2_1.5e-200</name>
                <branch_length>7.80406E-4</branch_length>
              </clade>
              <clade>
                <branch_length>0.002035062</branch_length>
                <confidence type="unknown">85</confidence>
                <clade>
                  <name>46_Schizosaccharomyces_pombe|SPBC839.15c.1_3_2.1e-200</name>
                  <branch_length>0.002811168</branch_length>
                </clade>
                <clade>
                  <name>46_Schizosaccharomyces_pombe|SPCC794.09c.1_1_6.4e-201</name>
                  <branch_length>0.003532045</branch_length>
                </clade>
              </clade>
            </clade>
          </clade>
          <clade>
            <name>47_Homolaphlyctis_polyrhiza|hpol2798_1_7.4e-216</name>
            <branch_length>0.129715101</branch_length>
          </clade>
          <clade>
            <name>17_Codosiga_hollandica|comp493728_c0_seq1_2_1.4e-53</name>
            <branch_length>0.057513908</branch_length>
          </clade>
          <clade>
            <name>48_Yarrowia_lipolytica|YALI0C09141g_1_8.9e-209</name>
            <branch_length>0.090994349</branch_length>
          </clade>
        </clade>
        <clade>
          <branch_length>0.247761315</branch_length>
          <confidence type="unknown">100</confidence>
          <clade>
            <name>50_Acanthamoeba_castellanii|ACA1_141420_3_6.5e-128</name>
            <branch_length>1.66E-6</branch_length>
          </clade>
          <clade>
            <name>50_Acanthamoeba_castellanii|ACA1_204600_1_4.9e-146</name>
            <branch_length>0.001370408</branch_length>
          </clade>
        </clade>
        <clade>
          <name>37_Daphnia_pulex|125451_3_1.1e-54</name>
          <branch_length>0.345575516</branch_length>
        </clade>
        <clade>
          <name>56_Guillardia_theta|84201_1_4.3e-155</name>
          <branch_length>0.494069289</branch_length>
        </clade>
        <clade>
          <name>50_Acanthamoeba_castellanii|ACA1_098360_2_7.1e-146</name>
          <branch_length>0.512917686</branch_length>
        </clade>
        <clade>
          <branch_length>0.40376472</branch_length>
          <confidence type="unknown">100</confidence>
          <clade>
            <branch_length>0.115831972</branch_length>
            <confidence type="unknown">100</confidence>
            <clade>
              <branch_length>0.989007905</branch_length>
              <confidence type="unknown">100</confidence>
              <clade>
                <name>48_Yarrowia_lipolytica|YALI0F24387g_3_7.6e-35</name>
                <branch_length>0.152729945</branch_length>
              </clade>
              <clade>
                <branch_length>0.08196986</branch_length>
                <confidence type="unknown">61</confidence>
                <clade>
                  <name>36_Pristionchus_pacificus|PPA15306_3_5.5e-17</name>
                  <branch_length>0.49262273</branch_length>
                </clade>
                <clade>
                  <name>20_Monosiga_brevicollis|35764_3_1.4e-27</name>
                  <branch_length>0.235766389</branch_length>
                </clade>
              </clade>
            </clade>
            <clade>
              <branch_length>0.069925635</branch_length>
              <confidence type="unknown">94</confidence>
              <clade>
                <branch_length>0.249772728</branch_length>
                <confidence type="unknown">100</confidence>
                <clade>
                  <branch_length>0.087653655</branch_length>
                  <confidence type="unknown">76</confidence>
                  <clade>
                    <name>56_Guillardia_theta|95026_3_3e-33</name>
                    <branch_length>0.349953122</branch_length>
                  </clade>
                  <clade>
                    <name>53_Chondrus_crispus|546303976_3_2.4e-19</name>
                    <branch_length>0.538544308</branch_length>
                  </clade>
                </clade>
                <clade>
                  <branch_length>0.154133975</branch_length>
                  <confidence type="unknown">95</confidence>
                  <clade>
                    <name>44_Coprinopsis_cinerea|CC1G_00279T0_2_3e-34</name>
                    <branch_length>0.274745011</branch_length>
                  </clade>
                  <clade>
                    <name>48_Yarrowia_lipolytica|YALI0B08250g_2_5.7e-40</name>
                    <branch_length>0.335557961</branch_length>
                  </clade>
                </clade>
                <clade>
                  <branch_length>0.478343529</branch_length>
                  <confidence type="unknown">100</confidence>
                  <clade>
                    <name>55_Emiliania_huxleyi|419452_3_1.5e-32</name>
                    <branch_length>0.002217317</branch_length>
                  </clade>
                  <clade>
                    <name>55_Emiliania_huxleyi|428552_2_3.8e-34</name>
                    <branch_length>1.66E-6</branch_length>
                  </clade>
                </clade>
                <clade>
                  <branch_length>0.185948744</branch_length>
                  <confidence type="unknown">99</confidence>
                  <clade>
                    <branch_length>0.032176617</branch_length>
                    <confidence type="unknown">88</confidence>
                    <clade>
                      <branch_length>0.073616656</branch_length>
                      <confidence type="unknown">82</confidence>
                      <clade>
                        <name>04_Salpingoeca_urceolata|comp13803_c0_seq1_3_3.6e-36</name>
                        <branch_length>0.157618993</branch_length>
                      </clade>
                      <clade>
                        <branch_length>0.164814639</branch_length>
                        <confidence type="unknown">100</confidence>
                        <clade>
                          <name>01_Diaphanoeca_grandis|comp16727_c0_seq1_3_5.9e-29</name>
                          <branch_length>0.279122253</branch_length>
                        </clade>
                        <clade>
                          <name>10_Didymoeca_costata|comp10031_c0_seq1_2_7.4e-26</name>
                          <branch_length>0.331448804</branch_length>
                        </clade>
                      </clade>
                    </clade>
                    <clade>
                      <branch_length>0.039675234</branch_length>
                      <confidence type="unknown">59</confidence>
                      <clade>
                        <branch_length>0.199752299</branch_length>
                        <confidence type="unknown">100</confidence>
                        <clade>
                          <name>15_Hartaetosiga_balthica|comp6843_c0_seq1_2_2.1e-29</name>
                          <branch_length>0.17546348</branch_length>
                        </clade>
                        <clade>
                          <name>05_Hartaetosiga_gracilis|comp10577_c0_seq1_2_1.8e-36</name>
                          <branch_length>0.103540303</branch_length>
                        </clade>
                      </clade>
                      <clade>
                        <name>09_Salpingoeca_kvevrii|comp12314_c0_seq1_3_1.4e-42</name>
                        <branch_length>0.230736457</branch_length>
                      </clade>
                      <clade>
                        <branch_length>0.136986737</branch_length>
                        <confidence type="unknown">97</confidence>
                        <clade>
                          <name>20_Monosiga_brevicollis|476_2_5.5e-33</name>
                          <branch_length>0.12409679</branch_length>
                        </clade>
                        <clade>
                          <name>11_Choanoeca_perplexa|comp13284_c0_seq1_3_7.5e-23</name>
                          <branch_length>0.222970131</branch_length>
                        </clade>
                      </clade>
                      <clade>
                        <branch_length>0.116373206</branch_length>
                        <confidence type="unknown">99</confidence>
                        <clade>
                          <name>21_Salpingoeca_rosetta|PTSG_07771T0_2_6.2e-47</name>
                          <branch_length>0.127808054</branch_length>
                        </clade>
                        <clade>
                          <name>13_Microstomoeca_roanoka|comp10557_c1_seq1_2_1.2e-39</name>
                          <branch_length>0.192441272</branch_length>
                        </clade>
                      </clade>
                    </clade>
                  </clade>
                  <clade>
                    <branch_length>0.118886999</branch_length>
                    <confidence type="unknown">100</confidence>
                    <clade>
                      <name>19_Mylnosiga_fluctuans|comp10662_c0_seq1_3_1.6e-42</name>
                      <branch_length>0.134065245</branch_length>
                    </clade>
                    <clade>
                      <name>18_Salpingoeca_helianthica|comp7551_c0_seq1_2_2.7e-50</name>
                      <branch_length>0.110661365</branch_length>
                    </clade>
                  </clade>
                </clade>
                <clade>
                  <branch_length>0.166826701</branch_length>
                  <confidence type="unknown">51</confidence>
                  <clade>
                    <name>36_Pristionchus_pacificus|PPA12569_2_3.2e-25</name>
                    <branch_length>0.312749594</branch_length>
                  </clade>
                  <clade>
                    <branch_length>0.075566404</branch_length>
                    <confidence type="unknown">77</confidence>
                    <clade>
                      <name>25_Mnemiopsis_leidyi|ML07306_3_6.8e-26</name>
                      <branch_length>0.436792694</branch_length>
                    </clade>
                    <clade>
                      <branch_length>0.076733682</branch_length>
                      <confidence type="unknown">89</confidence>
                      <clade>
                        <branch_length>0.082748022</branch_length>
                        <confidence type="unknown">87</confidence>
                        <clade>
                          <name>42_Helobdella_robusta|76588_3_1.1e-32</name>
                          <branch_length>0.19581976</branch_length>
                        </clade>
                        <clade>
                          <branch_length>0.097582658</branch_length>
                          <confidence type="unknown">95</confidence>
                          <clade>
                            <name>40_Lottia_gigantea|200201_3_5.9e-18</name>
                            <branch_length>0.237706592</branch_length>
                          </clade>
                          <clade>
                            <name>29_Trichoplax_adhaerens|53763_3_4.3e-23</name>
                            <branch_length>0.278916799</branch_length>
                          </clade>
                        </clade>
                      </clade>
                      <clade>
                        <branch_length>0.046898104</branch_length>
                        <confidence type="unknown">52</confidence>
                        <clade>
                          <branch_length>0.10555243</branch_length>
                          <confidence type="unknown">90</confidence>
                          <clade>
                            <name>27_Nematostella_vectensis|85083_3_1.3e-25</name>
                            <branch_length>0.15868316</branch_length>
                          </clade>
                          <clade>
                            <name>28_Acropora_digitifera|16889_3_1.8e-19</name>
                            <branch_length>0.185998715</branch_length>
                          </clade>
                        </clade>
                        <clade>
                          <name>34_Strongylocentrotus_purpuratus|390363688_3_2.1e-27</name>
                          <branch_length>0.256437357</branch_length>
                        </clade>
                      </clade>
                    </clade>
                  </clade>
                </clade>
              </clade>
              <clade>
                <branch_length>0.197165263</branch_length>
                <confidence type="unknown">100</confidence>
                <clade>
                  <name>53_Chondrus_crispus|546303526_2_6.3e-34</name>
                  <branch_length>1.086518139</branch_length>
                </clade>
                <clade>
                  <branch_length>0.074280652</branch_length>
                  <confidence type="unknown">61</confidence>
                  <clade>
                    <branch_length>0.17026365</branch_length>
                    <confidence type="unknown">99</confidence>
                    <clade>
                      <branch_length>0.44206347</branch_length>
                      <confidence type="unknown">100</confidence>
                      <clade>
                        <branch_length>0.006741569</branch_length>
                        <confidence type="unknown">100</confidence>
                        <clade>
                          <name>07_Stephanoeca_diplocostata_AU|comp23209_c0_seq9_3_3.7e-40</name>
                          <branch_length>1.66E-6</branch_length>
                        </clade>
                        <clade>
                          <name>07_Stephanoeca_diplocostata_AU|comp23209_c0_seq16_2_3.6e-40</name>
                          <branch_length>1.66E-6</branch_length>
                        </clade>
                      </clade>
                      <clade>
                        <branch_length>0.002735165</branch_length>
                        <confidence type="unknown">53</confidence>
                        <clade>
                          <name>07_Stephanoeca_diplocostata_FR|comp23197_c0_seq7_3_1.9e-37</name>
                          <branch_length>1.66E-6</branch_length>
                        </clade>
                        <clade>
                          <name>07_Stephanoeca_diplocostata_FR|comp23197_c0_seq1_2_1.6e-37</name>
                          <branch_length>0.004349643</branch_length>
                        </clade>
                      </clade>
                    </clade>
                    <clade>
                      <branch_length>0.265599362</branch_length>
                      <confidence type="unknown">100</confidence>
                      <clade>
                        <name>14_Savillea_parva|comp24024_c0_seq1_3_1.5e-44</name>
                        <branch_length>0.230379438</branch_length>
                      </clade>
                      <clade>
                        <branch_length>0.083117333</branch_length>
                        <confidence type="unknown">90</confidence>
                        <clade>
                          <name>08_Helgoeca_nana|comp26358_c0_seq1_3_2.4e-42</name>
                          <branch_length>0.186853784</branch_length>
                        </clade>
                        <clade>
                          <name>02_Acanthoeca_spectabilis|comp12856_c0_seq1_3_3.3e-38</name>
                          <branch_length>0.22457229</branch_length>
                        </clade>
                      </clade>
                    </clade>
                  </clade>
                  <clade>
                    <name>44_Coprinopsis_cinerea|CC1G_14592T0_3_4.3e-34</name>
                    <branch_length>0.809850135</branch_length>
                  </clade>
                  <clade>
                    <branch_length>0.146012556</branch_length>
                    <confidence type="unknown">63</confidence>
                    <clade>
                      <branch_length>0.115090387</branch_length>
                      <confidence type="unknown">97</confidence>
                      <clade>
                        <branch_length>0.574262647</branch_length>
                        <confidence type="unknown">100</confidence>
                        <clade>
                          <name>12_Salpingoeca_infusionum|comp15828_c0_seq2_2_1.9e-31</name>
                          <branch_length>1.66E-6</branch_length>
                        </clade>
                        <clade>
                          <name>12_Salpingoeca_infusionum|comp15828_c0_seq3_3_2.5e-31</name>
                          <branch_length>1.66E-6</branch_length>
                        </clade>
                      </clade>
                      <clade>
                        <branch_length>0.136360462</branch_length>
                        <confidence type="unknown">99</confidence>
                        <clade>
                          <branch_length>0.228297971</branch_length>
                          <confidence type="unknown">100</confidence>
                          <clade>
                            <name>13_Microstomoeca_roanoka|comp10520_c0_seq4_3_3.8e-33</name>
                            <branch_length>0.21357687</branch_length>
                          </clade>
                          <clade>
                            <name>21_Salpingoeca_rosetta|PTSG_08910T0_3_1.7e-42</name>
                            <branch_length>0.294767124</branch_length>
                          </clade>
                        </clade>
                        <clade>
                          <branch_length>0.316959611</branch_length>
                          <confidence type="unknown">100</confidence>
                          <clade>
                            <name>15_Hartaetosiga_balthica|comp9145_c0_seq3_3_1.4e-25</name>
                            <branch_length>0.31053514</branch_length>
                          </clade>
                          <clade>
                            <name>05_Hartaetosiga_gracilis|comp13250_c0_seq5_3_1.4e-25</name>
                            <branch_length>0.334470715</branch_length>
                          </clade>
                        </clade>
                      </clade>
                    </clade>
                    <clade>
                      <name>11_Choanoeca_perplexa|comp15712_c1_seq3_2_9.5e-35</name>
                      <branch_length>0.712376253</branch_length>
                    </clade>
                  </clade>
                  <clade>
                    <name>04_Salpingoeca_urceolata|comp15143_c0_seq1_2_1.5e-38</name>
                    <branch_length>0.472940337</branch_length>
                  </clade>
                  <clade>
                    <branch_length>0.340541471</branch_length>
                    <confidence type="unknown">82</confidence>
                    <clade>
                      <name>25_Mnemiopsis_leidyi|ML05084_2_1.6e-35</name>
                      <branch_length>0.601271894</branch_length>
                    </clade>
                    <clade>
                      <branch_length>0.080721853</branch_length>
                      <confidence type="unknown">71</confidence>
                      <clade>
                        <branch_length>0.151176578</branch_length>
                        <confidence type="unknown">93</confidence>
                        <clade>
                          <name>23_Ephydatia_muelleri|comp53443_c0_seq3_2_1.2e-38</name>
                          <branch_length>0.350474656</branch_length>
                        </clade>
                        <clade>
                          <name>24_Amphimedon_queenslandica|Aqu1.227960_3_4.7e-36</name>
                          <branch_length>0.288408156</branch_length>
                        </clade>
                      </clade>
                      <clade>
                        <branch_length>0.101687976</branch_length>
                        <confidence type="unknown">58</confidence>
                        <clade>
                          <name>34_Strongylocentrotus_purpuratus|390367044_2_1e-27</name>
                          <branch_length>0.462841487</branch_length>
                        </clade>
                        <clade>
                          <branch_length>0.077954715</branch_length>
                          <confidence type="unknown">90</confidence>
                          <clade>
                            <name>28_Acropora_digitifera|06535_2_2.9e-40</name>
                            <branch_length>0.472339515</branch_length>
                          </clade>
                          <clade>
                            <name>27_Nematostella_vectensis|86416_2_1e-42</name>
                            <branch_length>0.182482755</branch_length>
                          </clade>
                        </clade>
                      </clade>
                      <clade>
                        <branch_length>0.150940303</branch_length>
                        <confidence type="unknown">80</confidence>
                        <clade>
                          <branch_length>0.138595844</branch_length>
                          <confidence type="unknown">81</confidence>
                          <clade>
                            <name>49_Dictyostelium_discoideum|DDB0201566_3_4.1e-29</name>
                            <branch_length>0.716539887</branch_length>
                          </clade>
                          <clade>
                            <name>40_Lottia_gigantea|142523_2_3.7e-19</name>
                            <branch_length>0.274443399</branch_length>
                          </clade>
                        </clade>
                        <clade>
                          <branch_length>0.057811656</branch_length>
                          <confidence type="unknown">68</confidence>
                          <clade>
                            <name>41_Capitella_teleta|178027_3_2.4e-40</name>
                            <branch_length>0.263465507</branch_length>
                          </clade>
                          <clade>
                            <name>42_Helobdella_robusta|101631_2_1.2e-37</name>
                            <branch_length>0.337194858</branch_length>
                          </clade>
                        </clade>
                      </clade>
                      <clade>
                        <branch_length>0.371640504</branch_length>
                        <confidence type="unknown">100</confidence>
                        <clade>
                          <name>22_Oscarella_pearsei|comp40470_c0_seq7_3_2.9e-41</name>
                          <branch_length>1.66E-6</branch_length>
                        </clade>
                        <clade>
                          <name>22_Oscarella_pearsei|comp40470_c0_seq14_2_1.3e-41</name>
                          <branch_length>1.66E-6</branch_length>
                        </clade>
                      </clade>
                    </clade>
                  </clade>
                  <clade>
                    <branch_length>0.863898791</branch_length>
                    <confidence type="unknown">100</confidence>
                    <clade>
                      <name>47_Homolaphlyctis_polyrhiza|hpol14344_2_2.7e-48</name>
                      <branch_length>1.66E-6</branch_length>
                    </clade>
                    <clade>
                      <name>47_Homolaphlyctis_polyrhiza|hpol24279_3_9.9e-43</name>
                      <branch_length>1.66E-6</branch_length>
                    </clade>
                  </clade>
                  <clade>
                    <name>43_Capsaspora_owczarzaki|CAOG_08779T0_3_6.9e-54</name>
                    <branch_length>0.741257243</branch_length>
                  </clade>
                  <clade>
                    <name>10_Didymoeca_costata|comp15976_c1_seq17_3_3.4e-22</name>
                    <branch_length>0.885842848</branch_length>
                  </clade>
                  <clade>
                    <name>16_Salpingoeca_dolichothecata|comp21284_c0_seq1_3_1.6e-42</name>
                    <branch_length>0.59371529</branch_length>
                  </clade>
                  <clade>
                    <branch_length>0.281650776</branch_length>
                    <confidence type="unknown">97</confidence>
                    <clade>
                      <branch_length>0.22117795</branch_length>
                      <confidence type="unknown">100</confidence>
                      <clade>
                        <name>18_Salpingoeca_helianthica|comp14012_c0_seq5_3_2.6e-46</name>
                        <branch_length>0.349051936</branch_length>
                      </clade>
                      <clade>
                        <name>19_Mylnosiga_fluctuans|comp9538_c0_seq1_2_1.1e-50</name>
                        <branch_length>0.276851889</branch_length>
                      </clade>
                    </clade>
                    <clade>
                      <branch_length>0.32752205</branch_length>
                      <confidence type="unknown">100</confidence>
                      <clade>
                        <name>03_Salpingoeca_punica|comp15392_c0_seq3_3_2.1e-54</name>
                        <branch_length>1.66E-6</branch_length>
                      </clade>
                      <clade>
                        <name>03_Salpingoeca_punica|comp15392_c0_seq2_2_1.2e-54</name>
                        <branch_length>1.66E-6</branch_length>
                      </clade>
                    </clade>
                  </clade>
                  <clade>
                    <name>17_Codosiga_hollandica|comp56936_c0_seq5_3_2.2e-49</name>
                    <branch_length>0.675770436</branch_length>
                  </clade>
                  <clade>
                    <name>09_Salpingoeca_kvevrii|comp6845_c3_seq1_2_7.1e-48</name>
                    <branch_length>0.566168536</branch_length>
                  </clade>
                </clade>
              </clade>
            </clade>
          </clade>
          <clade>
            <branch_length>0.21475239</branch_length>
            <confidence type="unknown">100</confidence>
            <clade>
              <branch_length>0.059256178</branch_length>
              <confidence type="unknown">78</confidence>
              <clade>
                <branch_length>0.45492026</branch_length>
                <confidence type="unknown">100</confidence>
                <clade>
                  <name>58_Bigelowiella_natans|36951_2_1.5e-58</name>
                  <branch_length>0.088283613</branch_length>
                </clade>
                <clade>
                  <name>58_Bigelowiella_natans|48294_1_9.8e-63</name>
                  <branch_length>0.074087128</branch_length>
                </clade>
              </clade>
              <clade>
                <branch_length>0.080218669</branch_length>
                <confidence type="unknown">94</confidence>
                <clade>
                  <name>53_Chondrus_crispus|546303699_1_2.5e-80</name>
                  <branch_length>0.232449521</branch_length>
                </clade>
                <clade>
                  <branch_length>0.05983079</branch_length>
                  <confidence type="unknown">77</confidence>
                  <clade>
                    <branch_length>0.085981461</branch_length>
                    <confidence type="unknown">100</confidence>
                    <clade>
                      <branch_length>0.051761566</branch_length>
                      <confidence type="unknown">93</confidence>
                      <clade>
                        <name>01_Diaphanoeca_grandis|comp21622_c0_seq1_1_4.5e-71</name>
                        <branch_length>0.150240656</branch_length>
                      </clade>
                      <clade>
                        <name>10_Didymoeca_costata|comp16593_c0_seq1_1_1.2e-67</name>
                        <branch_length>0.124160463</branch_length>
                      </clade>
                    </clade>
                    <clade>
                      <branch_length>0.05538994</branch_length>
                      <confidence type="unknown">96</confidence>
                      <clade>
                        <name>08_Helgoeca_nana|comp11954_c0_seq1_1_5.2e-86</name>
                        <branch_length>0.0435331</branch_length>
                      </clade>
                      <clade>
                        <branch_length>0.016091275</branch_length>
                        <confidence type="unknown">72</confidence>
                        <clade>
                          <name>14_Savillea_parva|comp11742_c0_seq1_1_2.4e-75</name>
                          <branch_length>0.053930175</branch_length>
                        </clade>
                        <clade>
                          <name>02_Acanthoeca_spectabilis|comp16872_c0_seq1_1_7.3e-82</name>
                          <branch_length>0.039970943</branch_length>
                        </clade>
                      </clade>
                    </clade>
                    <clade>
                      <branch_length>0.156425645</branch_length>
                      <confidence type="unknown">100</confidence>
                      <clade>
                        <name>07_Stephanoeca_diplocostata_FR|comp25424_c0_seq1_1_3e-75</name>
                        <branch_length>1.66E-6</branch_length>
                      </clade>
                      <clade>
                        <name>07_Stephanoeca_diplocostata_AU|comp13645_c0_seq1_1_2.7e-75</name>
                        <branch_length>1.66E-6</branch_length>
                      </clade>
                    </clade>
                  </clade>
                  <clade>
                    <name>04_Salpingoeca_urceolata|comp4854_c0_seq1_1_2.6e-85</name>
                    <branch_length>0.116300268</branch_length>
                  </clade>
                  <clade>
                    <name>09_Salpingoeca_kvevrii|comp11121_c0_seq1_1_6.9e-88</name>
                    <branch_length>0.110836751</branch_length>
                  </clade>
                  <clade>
                    <branch_length>0.085146352</branch_length>
                    <confidence type="unknown">85</confidence>
                    <clade>
                      <name>03_Salpingoeca_punica|comp15798_c4_seq1_1_1.2e-87</name>
                      <branch_length>0.065459087</branch_length>
                    </clade>
                    <clade>
                      <branch_length>0.074344551</branch_length>
                      <confidence type="unknown">100</confidence>
                      <clade>
                        <name>06_Salpingoeca_macrocollata|comp19916_c1_seq1_3_3.8e-41</name>
                        <branch_length>0.414805923</branch_length>
                      </clade>
                      <clade>
                        <branch_length>0.040396468</branch_length>
                        <confidence type="unknown">100</confidence>
                        <clade>
                          <name>06_Salpingoeca_macrocollata|comp14078_c0_seq2_1_8.6e-84</name>
                          <branch_length>1.66E-6</branch_length>
                        </clade>
                        <clade>
                          <name>06_Salpingoeca_macrocollata|comp14078_c0_seq4_2_8.7e-84</name>
                          <branch_length>1.66E-6</branch_length>
                        </clade>
                      </clade>
                    </clade>
                  </clade>
                  <clade>
                    <branch_length>0.086766731</branch_length>
                    <confidence type="unknown">83</confidence>
                    <clade>
                      <branch_length>0.026881249</branch_length>
                      <confidence type="unknown">93</confidence>
                      <clade>
                        <name>11_Choanoeca_perplexa|comp17832_c0_seq1_1_7.4e-80</name>
                        <branch_length>0.116058709</branch_length>
                      </clade>
                      <clade>
                        <name>20_Monosiga_brevicollis|36952_1_9.2e-87</name>
                        <branch_length>0.042734221</branch_length>
                      </clade>
                    </clade>
                    <clade>
                      <branch_length>0.029146523</branch_length>
                      <confidence type="unknown">87</confidence>
                      <clade>
                        <name>21_Salpingoeca_rosetta|PTSG_02256T0_1_3.6e-90</name>
                        <branch_length>0.047836563</branch_length>
                      </clade>
                      <clade>
                        <branch_length>0.014380659</branch_length>
                        <confidence type="unknown">65</confidence>
                        <clade>
                          <name>13_Microstomoeca_roanoka|comp14746_c0_seq1_1_9.6e-58</name>
                          <branch_length>0.048680689</branch_length>
                        </clade>
                        <clade>
                          <branch_length>0.039838394</branch_length>
                          <confidence type="unknown">92</confidence>
                          <clade>
                            <branch_length>0.045864935</branch_length>
                            <confidence type="unknown">99</confidence>
                            <clade>
                              <name>15_Hartaetosiga_balthica|comp2194_c0_seq1_1_3e-69</name>
                              <branch_length>0.074178494</branch_length>
                            </clade>
                            <clade>
                              <name>05_Hartaetosiga_gracilis|comp12034_c1_seq1_1_1e-62</name>
                              <branch_length>0.028081638</branch_length>
                            </clade>
                          </clade>
                          <clade>
                            <name>12_Salpingoeca_infusionum|comp16162_c0_seq1_1_2.3e-80</name>
                            <branch_length>0.079156412</branch_length>
                          </clade>
                        </clade>
                      </clade>
                    </clade>
                  </clade>
                </clade>
                <clade>
                  <branch_length>0.066106382</branch_length>
                  <confidence type="unknown">68</confidence>
                  <clade>
                    <branch_length>0.023949313</branch_length>
                    <confidence type="unknown">63</confidence>
                    <clade>
                      <branch_length>0.025611448</branch_length>
                      <confidence type="unknown">60</confidence>
                      <clade>
                        <branch_length>0.099605139</branch_length>
                        <confidence type="unknown">100</confidence>
                        <clade>
                          <name>52_Chlamydomonas_reinhardtii|Cre12.g498600.t1.2_1_2.5e-84</name>
                          <branch_length>1.66E-6</branch_length>
                        </clade>
                        <clade>
                          <branch_length>0.008723773</branch_length>
                          <confidence type="unknown">100</confidence>
                          <clade>
                            <name>52_Chlamydomonas_reinhardtii|Cre06.g263450.t1.2_2_3.1e-84</name>
                            <branch_length>1.66E-6</branch_length>
                          </clade>
                          <clade>
                            <name>52_Chlamydomonas_reinhardtii|g5919.t1_3_3.1e-84</name>
                            <branch_length>1.66E-6</branch_length>
                          </clade>
                        </clade>
                      </clade>
                      <clade>
                        <name>55_Emiliania_huxleyi|462457_1_1.5e-67</name>
                        <branch_length>0.163480682</branch_length>
                      </clade>
                    </clade>
                    <clade>
                      <name>56_Guillardia_theta|150047_2_3.8e-79</name>
                      <branch_length>0.159787187</branch_length>
                    </clade>
                  </clade>
                  <clade>
                    <name>58_Bigelowiella_natans|73872_3_9.1e-56</name>
                    <branch_length>0.609970867</branch_length>
                  </clade>
                </clade>
              </clade>
            </clade>
            <clade>
              <name>59_Thalassiosira_pseudonana|41829_3_5.3e-73</name>
              <branch_length>0.328316625</branch_length>
            </clade>
          </clade>
        </clade>
        <clade>
          <name>16_Salpingoeca_dolichothecata|comp114844_c0_seq1_2_3.9e-65</name>
          <branch_length>0.727533618</branch_length>
        </clade>
        <clade>
          <branch_length>0.604627398</branch_length>
          <confidence type="unknown">100</confidence>
          <clade>
            <name>01_Diaphanoeca_grandis|comp9140_c1_seq1_2_1.7e-69</name>
            <branch_length>0.577670626</branch_length>
          </clade>
          <clade>
            <branch_length>0.363662843</branch_length>
            <confidence type="unknown">100</confidence>
            <clade>
              <name>02_Acanthoeca_spectabilis|comp13765_c0_seq1_2_3.1e-49</name>
              <branch_length>0.256599956</branch_length>
            </clade>
            <clade>
              <branch_length>0.057315953</branch_length>
              <confidence type="unknown">76</confidence>
              <clade>
                <name>14_Savillea_parva|comp4176_c0_seq2_2_4.1e-49</name>
                <branch_length>0.463278615</branch_length>
              </clade>
              <clade>
                <name>08_Helgoeca_nana|comp22256_c0_seq1_2_2.7e-58</name>
                <branch_length>0.198907813</branch_length>
              </clade>
            </clade>
          </clade>
        </clade>
        <clade>
          <name>17_Codosiga_hollandica|comp54979_c1_seq1_1_1.5e-233</name>
          <branch_length>0.183624985</branch_length>
        </clade>
        <clade>
          <name>16_Salpingoeca_dolichothecata|comp7178_c0_seq1_1_1.9e-222</name>
          <branch_length>0.201491053</branch_length>
        </clade>
      </clade>
    </clade>
    <clade>
      <name>27_Nematostella_vectensis|247215_1_1.4e-175</name>
      <branch_length>0.257765658</branch_length>
    </clade>
    <clade>
      <name>28_Acropora_digitifera|08068_1_4.8e-183</name>
      <branch_length>0.282797205</branch_length>
    </clade>
    <clade>
      <name>22_Oscarella_pearsei|comp8888_c0_seq1_1_1.6e-176</name>
      <branch_length>0.293002613</branch_length>
    </clade>
    <clade>
      <branch_length>0.193105038</branch_length>
      <confidence type="unknown">100</confidence>
      <clade>
        <name>24_Amphimedon_queenslandica|Aqu1.225062_2_6.7e-169</name>
        <branch_length>0.054642388</branch_length>
      </clade>
      <clade>
        <name>24_Amphimedon_queenslandica|Aqu1.225061_1_1e-189</name>
        <branch_length>0.019969669</branch_length>
      </clade>
    </clade>
    <clade>
      <branch_length>0.242325121</branch_length>
      <confidence type="unknown">100</confidence>
      <clade>
        <name>23_Ephydatia_muelleri|comp29667_c0_seq1_1_3.6e-195</name>
        <branch_length>1.66E-6</branch_length>
      </clade>
      <clade>
        <name>23_Ephydatia_muelleri|comp292889_c0_seq1_3_1.3e-38</name>
        <branch_length>1.66E-6</branch_length>
      </clade>
    </clade>
    <clade>
      <name>30_Ciona_intestinalis|ENSCINT00000033314_1_2e-186</name>
      <branch_length>0.17763192</branch_length>
    </clade>
    <clade>
      <name>42_Helobdella_robusta|100373_1_1.1e-169</name>
      <branch_length>0.286232458</branch_length>
    </clade>
    <clade>
      <branch_length>0.324001159</branch_length>
      <confidence type="unknown">100</confidence>
      <clade>
        <name>26_Hydra_vulgaris|Hma2.233539_3_3.3e-163</name>
        <branch_length>1.66E-6</branch_length>
      </clade>
      <clade>
        <name>26_Hydra_vulgaris|Hma2.233538_2_3.3e-163</name>
        <branch_length>3.321E-6</branch_length>
      </clade>
      <clade>
        <name>26_Hydra_vulgaris|Hma2.233537_1_3.3e-163</name>
        <branch_length>3.321E-6</branch_length>
      </clade>
    </clade>
    <clade>
      <branch_length>0.239914514</branch_length>
      <confidence type="unknown">100</confidence>
      <clade>
        <name>29_Trichoplax_adhaerens|36635_1_1.4e-180</name>
        <branch_length>0.028736301</branch_length>
      </clade>
      <clade>
        <name>29_Trichoplax_adhaerens|31868_2_1e-169</name>
        <branch_length>0.084470152</branch_length>
      </clade>
    </clade>
    <clade>
      <branch_length>0.255967789</branch_length>
      <confidence type="unknown">100</confidence>
      <clade>
        <name>30_Ciona_intestinalis|ENSCINT00000036833_3_5.8e-152</name>
        <branch_length>0.103282765</branch_length>
      </clade>
      <clade>
        <name>30_Ciona_intestinalis|ENSCINT00000015866_2_5.3e-160</name>
        <branch_length>0.130709647</branch_length>
      </clade>
    </clade>
    <clade>
      <branch_length>0.110842665</branch_length>
      <confidence type="unknown">68</confidence>
      <clade>
        <branch_length>0.135725813</branch_length>
        <confidence type="unknown">100</confidence>
        <clade>
          <name>39_Tetranychus_urticae|tetur08g03070_3_2e-162</name>
          <branch_length>0.00408427</branch_length>
        </clade>
        <clade>
          <name>39_Tetranychus_urticae|tetur08g02980_1_1e-162</name>
          <branch_length>0.006703946</branch_length>
        </clade>
        <clade>
          <name>39_Tetranychus_urticae|tetur08g03040_2_2e-162</name>
          <branch_length>0.007457926</branch_length>
        </clade>
      </clade>
      <clade>
        <branch_length>0.041999044</branch_length>
        <confidence type="unknown">87</confidence>
        <clade>
          <branch_length>0.153255949</branch_length>
          <confidence type="unknown">100</confidence>
          <clade>
            <name>49_Dictyostelium_discoideum|DDB0191135_1_7.2e-155</name>
            <branch_length>0.006427784</branch_length>
          </clade>
          <clade>
            <name>49_Dictyostelium_discoideum|DDB0191134_2_5.7e-151</name>
            <branch_length>0.014434908</branch_length>
          </clade>
        </clade>
        <clade>
          <branch_length>0.05758075</branch_length>
          <confidence type="unknown">98</confidence>
          <clade>
            <branch_length>0.122651353</branch_length>
            <confidence type="unknown">78</confidence>
            <clade>
              <name>59_Thalassiosira_pseudonana|3858_2_7.6e-105</name>
              <branch_length>0.287284882</branch_length>
            </clade>
            <clade>
              <name>59_Thalassiosira_pseudonana|1861_1_6.3e-111</name>
              <branch_length>0.358288472</branch_length>
            </clade>
          </clade>
          <clade>
            <name>57_Tetrahymena_thermophila|96_1_9.5e-147</name>
            <branch_length>0.196507357</branch_length>
          </clade>
          <clade>
            <branch_length>0.658232011</branch_length>
            <confidence type="unknown">100</confidence>
            <clade>
              <name>57_Tetrahymena_thermophila|3736_2_2.7e-73</name>
              <branch_length>1.66E-6</branch_length>
            </clade>
            <clade>
              <name>57_Tetrahymena_thermophila|3703_3_1.6e-69</name>
              <branch_length>0.027490346</branch_length>
            </clade>
          </clade>
          <clade>
            <branch_length>0.187816656</branch_length>
            <confidence type="unknown">100</confidence>
            <clade>
              <name>54_Naegleria_gruberi|56672_2_9.2e-123</name>
              <branch_length>0.001735054</branch_length>
            </clade>
            <clade>
              <branch_length>0.004835986</branch_length>
              <confidence type="unknown">61</confidence>
              <clade>
                <name>54_Naegleria_gruberi|55913_3_1.4e-122</name>
                <branch_length>0.014752969</branch_length>
              </clade>
              <clade>
                <name>54_Naegleria_gruberi|82621_1_7e-123</name>
                <branch_length>0.004993677</branch_length>
              </clade>
            </clade>
          </clade>
        </clade>
      </clade>
    </clade>
  </clade>
</phylogeny>
<phylogeny rooted="false" rerootable="true">
  <name>EFL</name>
  <clade>
    <clade>
      <name>26_Hydra_vulgaris|Hma2.233537_1_3e-67</name>
      <branch_length>1.62E-6</branch_length>
    </clade>
    <clade>
      <name>26_Hydra_vulgaris|Hma2.233539_3_3e-67</name>
      <branch_length>1.62E-6</branch_length>
    </clade>
    <clade>
      <name>26_Hydra_vulgaris|Hma2.233538_2_3e-67</name>
      <branch_length>3.24E-6</branch_length>
    </clade>
    <clade>
      <branch_length>0.202037642</branch_length>
      <confidence type="unknown">100</confidence>
      <clade>
        <branch_length>0.107415706</branch_length>
        <confidence type="unknown">100</confidence>
        <clade>
          <name>29_Trichoplax_adhaerens|36635_1_2.4e-76</name>
          <branch_length>0.038332978</branch_length>
        </clade>
        <clade>
          <name>29_Trichoplax_adhaerens|31868_2_4.5e-68</name>
          <branch_length>0.077724708</branch_length>
        </clade>
      </clade>
      <clade>
        <branch_length>0.056024259</branch_length>
        <confidence type="unknown">54</confidence>
        <clade>
          <branch_length>0.055966084</branch_length>
          <confidence type="unknown">73</confidence>
          <clade>
            <branch_length>0.148799259</branch_length>
            <confidence type="unknown">100</confidence>
            <clade>
              <name>39_Tetranychus_urticae|tetur08g03040_1_1.1e-66</name>
              <branch_length>0.002356228</branch_length>
            </clade>
            <clade>
              <branch_length>0.001914998</branch_length>
              <confidence type="unknown">52</confidence>
              <clade>
                <name>39_Tetranychus_urticae|tetur08g03070_3_1.3e-65</name>
                <branch_length>0.007798309</branch_length>
              </clade>
              <clade>
                <name>39_Tetranychus_urticae|tetur08g02980_2_4.1e-66</name>
                <branch_length>0.00351885</branch_length>
              </clade>
            </clade>
          </clade>
          <clade>
            <branch_length>0.039238924</branch_length>
            <confidence type="unknown">88</confidence>
            <clade>
              <branch_length>0.054550422</branch_length>
              <confidence type="unknown">98</confidence>
              <clade>
                <branch_length>0.127183097</branch_length>
                <confidence type="unknown">78</confidence>
                <clade>
                  <name>59_Thalassiosira_pseudonana|1861_2_5.3e-73</name>
                  <branch_length>0.344524556</branch_length>
                </clade>
                <clade>
                  <name>59_Thalassiosira_pseudonana|3858_3_4.1e-53</name>
                  <branch_length>0.283984183</branch_length>
                </clade>
              </clade>
              <clade>
                <name>57_Tetrahymena_thermophila|96_1_5.3e-84</name>
                <branch_length>0.202137272</branch_length>
              </clade>
              <clade>
                <branch_length>0.646811626</branch_length>
                <confidence type="unknown">100</confidence>
                <clade>
                  <name>57_Tetrahymena_thermophila|3736_2_4.2e-49</name>
                  <branch_length>1.62E-6</branch_length>
                </clade>
                <clade>
                  <name>57_Tetrahymena_thermophila|3703_3_2.4e-44</name>
                  <branch_length>0.028653085</branch_length>
                </clade>
              </clade>
              <clade>
                <branch_length>0.186270374</branch_length>
                <confidence type="unknown">100</confidence>
                <clade>
                  <name>54_Naegleria_gruberi|56672_2_3.5e-78</name>
                  <branch_length>0.001792295</branch_length>
                </clade>
                <clade>
                  <name>54_Naegleria_gruberi|82621_3_2.2e-77</name>
                  <branch_length>0.010340788</branch_length>
                </clade>
                <clade>
                  <name>54_Naegleria_gruberi|55913_1_3.2e-78</name>
                  <branch_length>0.022319114</branch_length>
                </clade>
              </clade>
            </clade>
            <clade>
              <branch_length>0.156772867</branch_length>
              <confidence type="unknown">100</confidence>
              <clade>
                <name>49_Dictyostelium_discoideum|DDB0191135_1_2.9e-78</name>
                <branch_length>0.004986342</branch_length>
              </clade>
              <clade>
                <name>49_Dictyostelium_discoideum|DDB0191134_2_1.6e-75</name>
                <branch_length>0.015613068</branch_length>
              </clade>
            </clade>
          </clade>
        </clade>
        <clade>
          <name>40_Lottia_gigantea|239271_1_6.8e-71</name>
          <branch_length>0.232218985</branch_length>
        </clade>
        <clade>
          <branch_length>0.185186901</branch_length>
          <confidence type="unknown">100</confidence>
          <clade>
            <name>30_Ciona_intestinalis|ENSCINT00000015868_2_1.4e-65</name>
            <branch_length>0.150047441</branch_length>
          </clade>
          <clade>
            <name>30_Ciona_intestinalis|ENSCINT00000036833_3_1.8e-65</name>
            <branch_length>0.11936026</branch_length>
          </clade>
        </clade>
        <clade>
          <name>30_Ciona_intestinalis|ENSCINT00000033314_1_5.9e-91</name>
          <branch_length>0.173631328</branch_length>
        </clade>
        <clade>
          <branch_length>0.201212181</branch_length>
          <confidence type="unknown">100</confidence>
          <clade>
            <name>24_Amphimedon_queenslandica|Aqu1.225061_1_4.1e-80</name>
            <branch_length>0.022007889</branch_length>
          </clade>
          <clade>
            <name>24_Amphimedon_queenslandica|Aqu1.225062_2_2.3e-78</name>
            <branch_length>0.054425645</branch_length>
          </clade>
        </clade>
        <clade>
          <name>27_Nematostella_vectensis|247215_1_8.8e-82</name>
          <branch_length>0.293882406</branch_length>
        </clade>
        <clade>
          <name>23_Ephydatia_muelleri|comp29667_c0_seq1_1_2.3e-90</name>
          <branch_length>0.328488497</branch_length>
        </clade>
        <clade>
          <branch_length>0.166539242</branch_length>
          <confidence type="unknown">54</confidence>
          <clade>
            <name>34_Strongylocentrotus_purpuratus|184186094_1_7.2e-86</name>
            <branch_length>0.171770053</branch_length>
          </clade>
          <clade>
            <branch_length>0.045032678</branch_length>
            <confidence type="unknown">75</confidence>
            <clade>
              <branch_length>0.136134583</branch_length>
              <confidence type="unknown">100</confidence>
              <clade>
                <name>41_Capitella_teleta|148876_1_3.3e-99</name>
                <branch_length>1.62E-6</branch_length>
              </clade>
              <clade>
                <name>41_Capitella_teleta|149613_2_1.1e-68</name>
                <branch_length>0.005814383</branch_length>
              </clade>
            </clade>
            <clade>
              <branch_length>0.085636421</branch_length>
              <confidence type="unknown">55</confidence>
              <clade>
                <branch_length>0.025710393</branch_length>
                <confidence type="unknown">86</confidence>
                <clade>
                  <branch_length>0.048413107</branch_length>
                  <confidence type="unknown">99</confidence>
                  <clade>
                    <name>31_Gasterosteus_aculeatus|ENSGACT00000002842_3_1.6e-90</name>
                    <branch_length>0.045538054</branch_length>
                  </clade>
                  <clade>
                    <branch_length>0.044328259</branch_length>
                    <confidence type="unknown">100</confidence>
                    <clade>
                      <name>31_Gasterosteus_aculeatus|ENSGACT00000002834_2_1.8e-94</name>
                      <branch_length>0.021114165</branch_length>
                    </clade>
                    <clade>
                      <name>31_Gasterosteus_aculeatus|ENSGACT00000002893_1_6.5e-96</name>
                      <branch_length>0.02444896</branch_length>
                    </clade>
                  </clade>
                </clade>
                <clade>
                  <branch_length>0.065012095</branch_length>
                  <confidence type="unknown">99</confidence>
                  <clade>
                    <branch_length>0.127315146</branch_length>
                    <confidence type="unknown">100</confidence>
                    <clade>
                      <name>32_Mus_musculus|126032328_1_1.2e-80</name>
                      <branch_length>1.62E-6</branch_length>
                    </clade>
                    <clade>
                      <name>32_Mus_musculus|126090591_3_1.3e-71</name>
                      <branch_length>0.028819453</branch_length>
                    </clade>
                  </clade>
                  <clade>
                    <name>32_Mus_musculus|31982852_2_2e-80</name>
                    <branch_length>0.109406171</branch_length>
                  </clade>
                </clade>
              </clade>
              <clade>
                <branch_length>0.045937371</branch_length>
                <confidence type="unknown">99</confidence>
                <clade>
                  <branch_length>0.037266614</branch_length>
                  <confidence type="unknown">100</confidence>
                  <clade>
                    <name>33_Branchiostoma_floridae|122567_1_1.8e-101</name>
                    <branch_length>9.9369E-5</branch_length>
                  </clade>
                  <clade>
                    <name>33_Branchiostoma_floridae|126207_2_8.6e-101</name>
                    <branch_length>0.006296386</branch_length>
                  </clade>
                </clade>
                <clade>
                  <name>33_Branchiostoma_floridae|91258_3_3.2e-97</name>
                  <branch_length>0.070875255</branch_length>
                </clade>
              </clade>
            </clade>
            <clade>
              <branch_length>0.113632003</branch_length>
              <confidence type="unknown">84</confidence>
              <clade>
                <branch_length>0.040959429</branch_length>
                <confidence type="unknown">97</confidence>
                <clade>
                  <name>38_Drosophila_melanogaster|FBtr0085835_3_1.1e-94</name>
                  <branch_length>0.144542749</branch_length>
                </clade>
                <clade>
                  <branch_length>0.05871105</branch_length>
                  <confidence type="unknown">100</confidence>
                  <clade>
                    <name>38_Drosophila_melanogaster|FBtr0088035_1_3.4e-98</name>
                    <branch_length>1.62E-6</branch_length>
                  </clade>
                  <clade>
                    <name>38_Drosophila_melanogaster|FBtr0331927_2_4.7e-98</name>
                    <branch_length>1.62E-6</branch_length>
                  </clade>
                </clade>
              </clade>
              <clade>
                <branch_length>0.097905364</branch_length>
                <confidence type="unknown">100</confidence>
                <clade>
                  <name>37_Daphnia_pulex|300259_1_5.3e-96</name>
                  <branch_length>0.012030657</branch_length>
                </clade>
                <clade>
                  <name>37_Daphnia_pulex|300308_2_5.5e-93</name>
                  <branch_length>0.045138355</branch_length>
                </clade>
              </clade>
            </clade>
            <clade>
              <name>17_Codosiga_hollandica|comp54979_c1_seq1_1_1.8e-102</name>
              <branch_length>0.181199589</branch_length>
            </clade>
            <clade>
              <branch_length>0.165997861</branch_length>
              <confidence type="unknown">95</confidence>
              <clade>
                <name>19_Mylnosiga_fluctuans|comp10164_c0_seq1_1_5.2e-100</name>
                <branch_length>0.04845004</branch_length>
              </clade>
              <clade>
                <name>18_Salpingoeca_helianthica|comp15617_c0_seq1_1_4.2e-98</name>
                <branch_length>0.079046996</branch_length>
              </clade>
            </clade>
            <clade>
              <branch_length>0.208758573</branch_length>
              <confidence type="unknown">100</confidence>
              <clade>
                <name>43_Capsaspora_owczarzaki|CAOG_09985T0_2_2.1e-83</name>
                <branch_length>0.00264294</branch_length>
              </clade>
              <clade>
                <name>43_Capsaspora_owczarzaki|CAOG_07807T0_1_8e-107</name>
                <branch_length>1.62E-6</branch_length>
              </clade>
            </clade>
            <clade>
              <branch_length>0.22318</branch_length>
              <confidence type="unknown">100</confidence>
              <clade>
                <branch_length>0.081189941</branch_length>
                <confidence type="unknown">100</confidence>
                <clade>
                  <name>35_Caenorhabditis_elegans|F31E3.5_1_9.4e-93</name>
                  <branch_length>0.020205638</branch_length>
                </clade>
                <clade>
                  <branch_length>0.03585204</branch_length>
                  <confidence type="unknown">100</confidence>
                  <clade>
                    <name>35_Caenorhabditis_elegans|R03G5.1d_3_6e-76</name>
                    <branch_length>1.62E-6</branch_length>
                  </clade>
                  <clade>
                    <name>35_Caenorhabditis_elegans|R03G5.1a_2_1.2e-89</name>
                    <branch_length>7.60991E-4</branch_length>
                  </clade>
                </clade>
              </clade>
              <clade>
                <name>36_Pristionchus_pacificus|PPA26170_1_1.4e-93</name>
                <branch_length>0.026242822</branch_length>
              </clade>
            </clade>
            <clade>
              <branch_length>0.17273987</branch_length>
              <confidence type="unknown">60</confidence>
              <clade>
                <branch_length>0.061425607</branch_length>
                <confidence type="unknown">73</confidence>
                <clade>
                  <branch_length>0.021971755</branch_length>
                  <confidence type="unknown">55</confidence>
                  <clade>
                    <branch_length>0.300996107</branch_length>
                    <confidence type="unknown">100</confidence>
                    <clade>
                      <name>01_Diaphanoeca_grandis|comp9140_c1_seq1_2_9.5e-34</name>
                      <branch_length>0.587369082</branch_length>
                    </clade>
                    <clade>
                      <name>08_Helgoeca_nana|comp22256_c0_seq1_2_2.9e-29</name>
                      <branch_length>0.570743771</branch_length>
                    </clade>
                  </clade>
                  <clade>
                    <branch_length>0.085694035</branch_length>
                    <confidence type="unknown">100</confidence>
                    <clade>
                      <branch_length>0.118291754</branch_length>
                      <confidence type="unknown">100</confidence>
                      <clade>
                        <branch_length>0.712515581</branch_length>
                        <confidence type="unknown">100</confidence>
                        <clade>
                          <name>48_Yarrowia_lipolytica|YALI0F24387g_2_1e-31</name>
                          <branch_length>0.254374762</branch_length>
                        </clade>
                        <clade>
                          <branch_length>0.096933228</branch_length>
                          <confidence type="unknown">100</confidence>
                          <clade>
                            <name>04_Salpingoeca_urceolata|comp13616_c0_seq3_3_2.9e-29</name>
                            <branch_length>0.173262083</branch_length>
                          </clade>
                          <clade>
                            <name>20_Monosiga_brevicollis|35764_3_2.5e-25</name>
                            <branch_length>0.154543065</branch_length>
                          </clade>
                        </clade>
                        <clade>
                          <name>44_Coprinopsis_cinerea|CC1G_06762T0_3_2e-22</name>
                          <branch_length>0.326246998</branch_length>
                        </clade>
                        <clade>
                          <branch_length>0.153431748</branch_length>
                          <confidence type="unknown">80</confidence>
                          <clade>
                            <name>28_Acropora_digitifera|06518_3_1.8e-15</name>
                            <branch_length>0.271963049</branch_length>
                          </clade>
                          <clade>
                            <branch_length>0.16999737</branch_length>
                            <confidence type="unknown">80</confidence>
                            <clade>
                              <name>40_Lottia_gigantea|178160_3_1.9e-10</name>
                              <branch_length>0.387942346</branch_length>
                            </clade>
                            <clade>
                              <name>36_Pristionchus_pacificus|PPA15306_2_1.9e-19</name>
                              <branch_length>0.455981914</branch_length>
                            </clade>
                          </clade>
                        </clade>
                        <clade>
                          <name>47_Homolaphlyctis_polyrhiza|hpol11066_3_3.4e-32</name>
                          <branch_length>0.302167928</branch_length>
                        </clade>
                        <clade>
                          <branch_length>0.163184555</branch_length>
                          <confidence type="unknown">79</confidence>
                          <clade>
                            <name>53_Chondrus_crispus|546327029_3_2.5e-21</name>
                            <branch_length>0.27428075</branch_length>
                          </clade>
                          <clade>
                            <branch_length>0.11965186</branch_length>
                            <confidence type="unknown">79</confidence>
                            <clade>
                              <branch_length>0.125807019</branch_length>
                              <confidence type="unknown">98</confidence>
                              <clade>
                                <name>14_Savillea_parva|comp10173_c0_seq1_3_2.6e-29</name>
                                <branch_length>0.088632281</branch_length>
                              </clade>
                              <clade>
                                <name>15_Hartaetosiga_balthica|comp1326_c0_seq1_2_3.7e-24</name>
                                <branch_length>0.113651002</branch_length>
                              </clade>
                            </clade>
                            <clade>
                              <name>49_Dictyostelium_discoideum|DDB0235257_3_2.2e-29</name>
                              <branch_length>0.469437949</branch_length>
                            </clade>
                          </clade>
                        </clade>
                      </clade>
                      <clade>
                        <branch_length>0.086038614</branch_length>
                        <confidence type="unknown">99</confidence>
                        <clade>
                          <branch_length>0.169849669</branch_length>
                          <confidence type="unknown">100</confidence>
                          <clade>
                            <branch_length>0.122913502</branch_length>
                            <confidence type="unknown">91</confidence>
                            <clade>
                              <branch_length>0.109377271</branch_length>
                              <confidence type="unknown">78</confidence>
                              <clade>
                                <name>01_Diaphanoeca_grandis|comp27552_c1_seq1_3_1.2e-23</name>
                                <branch_length>0.512952786</branch_length>
                              </clade>
                              <clade>
                                <branch_length>0.281545695</branch_length>
                                <confidence type="unknown">100</confidence>
                                <clade>
                                  <name>14_Savillea_parva|comp24024_c0_seq1_2_3.1e-33</name>
                                  <branch_length>0.236231398</branch_length>
                                </clade>
                                <clade>
                                  <name>08_Helgoeca_nana|comp26358_c0_seq1_3_2.7e-28</name>
                                  <branch_length>0.220387024</branch_length>
                                </clade>
                              </clade>
                              <clade>
                                <branch_length>0.512679775</branch_length>
                                <confidence type="unknown">100</confidence>
                                <clade>
                                  <branch_length>0.00789246</branch_length>
                                  <confidence type="unknown">100</confidence>
                                  <clade>
                                    <name>07_Stephanoeca_diplocostata_AU|comp23209_c0_seq9_2_1e-30</name>
                                    <branch_length>1.62E-6</branch_length>
                                  </clade>
                                  <clade>
                                    <name>07_Stephanoeca_diplocostata_AU|comp23209_c0_seq16_3_1e-30</name>
                                    <branch_length>1.62E-6</branch_length>
                                  </clade>
                                </clade>
                                <clade>
                                  <name>07_Stephanoeca_diplocostata_FR|comp23197_c0_seq7_3_2.9e-24</name>
                                  <branch_length>0.001607101</branch_length>
                                </clade>
                              </clade>
                            </clade>
                            <clade>
                              <branch_length>0.073566697</branch_length>
                              <confidence type="unknown">58</confidence>
                              <clade>
                                <branch_length>0.078810027</branch_length>
                                <confidence type="unknown">79</confidence>
                                <clade>
                                  <branch_length>0.127072603</branch_length>
                                  <confidence type="unknown">96</confidence>
                                  <clade>
                                    <branch_length>0.095452696</branch_length>
                                    <confidence type="unknown">96</confidence>
                                    <clade>
                                      <name>05_Hartaetosiga_gracilis|comp13250_c0_seq5_3_1.8e-25</name>
                                      <branch_length>0.579743111</branch_length>
                                    </clade>
                                    <clade>
                                      <branch_length>0.259552051</branch_length>
                                      <confidence type="unknown">100</confidence>
                                      <clade>
                                        <name>13_Microstomoeca_roanoka|comp10520_c0_seq4_3_6.7e-29</name>
                                        <branch_length>0.185635286</branch_length>
                                      </clade>
                                      <clade>
                                        <name>21_Salpingoeca_rosetta|PTSG_08910T0_2_1.4e-35</name>
                                        <branch_length>0.325849423</branch_length>
                                      </clade>
                                    </clade>
                                  </clade>
                                  <clade>
                                    <branch_length>0.620510203</branch_length>
                                    <confidence type="unknown">100</confidence>
                                    <clade>
                                      <name>12_Salpingoeca_infusionum|comp15828_c0_seq2_3_1.2e-28</name>
                                      <branch_length>1.62E-6</branch_length>
                                    </clade>
                                    <clade>
                                      <name>12_Salpingoeca_infusionum|comp15828_c0_seq3_2_1e-28</name>
                                      <branch_length>1.62E-6</branch_length>
                                    </clade>
                                  </clade>
                                </clade>
                                <clade>
                                  <name>11_Choanoeca_perplexa|comp15712_c1_seq3_3_1.5e-17</name>
                                  <branch_length>0.700981547</branch_length>
                                </clade>
                              </clade>
                              <clade>
                                <branch_length>0.141592746</branch_length>
                                <confidence type="unknown">83</confidence>
                                <clade>
                                  <branch_length>0.096543084</branch_length>
                                  <confidence type="unknown">88</confidence>
                                  <clade>
                                    <name>25_Mnemiopsis_leidyi|ML05084_2_2.6e-32</name>
                                    <branch_length>0.581736459</branch_length>
                                  </clade>
                                  <clade>
                                    <branch_length>0.09879735</branch_length>
                                    <confidence type="unknown">86</confidence>
                                    <clade>
                                      <branch_length>0.076131166</branch_length>
                                      <confidence type="unknown">83</confidence>
                                      <clade>
                                        <branch_length>0.106273564</branch_length>
                                        <confidence type="unknown">99</confidence>
                                        <clade>
                                          <name>40_Lottia_gigantea|142523_2_3.3e-17</name>
                                          <branch_length>0.40044595</branch_length>
                                        </clade>
                                        <clade>
                                          <branch_length>0.052597814</branch_length>
                                          <confidence type="unknown">52</confidence>
                                          <clade>
                                            <name>41_Capitella_teleta|178027_3_5.5e-29</name>
                                            <branch_length>0.271172434</branch_length>
                                          </clade>
                                          <clade>
                                            <name>42_Helobdella_robusta|101631_2_1.3e-31</name>
                                            <branch_length>0.334018662</branch_length>
                                          </clade>
                                        </clade>
                                      </clade>
                                      <clade>
                                        <branch_length>0.316691016</branch_length>
                                        <confidence type="unknown">100</confidence>
                                        <clade>
                                          <name>22_Oscarella_pearsei|comp40470_c0_seq7_3_4.9e-27</name>
                                          <branch_length>1.62E-6</branch_length>
                                        </clade>
                                        <clade>
                                          <name>22_Oscarella_pearsei|comp40470_c0_seq14_2_2.3e-27</name>
                                          <branch_length>1.62E-6</branch_length>
                                        </clade>
                                      </clade>
                                    </clade>
                                    <clade>
                                      <branch_length>0.040776152</branch_length>
                                      <confidence type="unknown">52</confidence>
                                      <clade>
                                        <branch_length>0.130250818</branch_length>
                                        <confidence type="unknown">99</confidence>
                                        <clade>
                                          <name>28_Acropora_digitifera|06535_2_2.1e-32</name>
                                          <branch_length>0.483127179</branch_length>
                                        </clade>
                                        <clade>
                                          <name>27_Nematostella_vectensis|86416_2_7.2e-29</name>
                                          <branch_length>0.20005066</branch_length>
                                        </clade>
                                      </clade>
                                      <clade>
                                        <branch_length>0.105365879</branch_length>
                                        <confidence type="unknown">99</confidence>
                                        <clade>
                                          <branch_length>0.36338857</branch_length>
                                          <confidence type="unknown">100</confidence>
                                          <clade>
                                            <name>23_Ephydatia_muelleri|comp53443_c0_seq3_2_3.6e-31</name>
                                            <branch_length>1.62E-6</branch_length>
                                          </clade>
                                          <clade>
                                            <name>23_Ephydatia_muelleri|comp53443_c0_seq2_3_4.3e-31</name>
                                            <branch_length>1.62E-6</branch_length>
                                          </clade>
                                        </clade>
                                        <clade>
                                          <name>24_Amphimedon_queenslandica|Aqu1.227960_3_9.2e-26</name>
                                          <branch_length>0.292072428</branch_length>
                                        </clade>
                                      </clade>
                                    </clade>
                                  </clade>
                                </clade>
                                <clade>
                                  <name>47_Homolaphlyctis_polyrhiza|hpol14344_2_1e-35</name>
                                  <branch_length>0.553456628</branch_length>
                                </clade>
                              </clade>
                              <clade>
                                <name>04_Salpingoeca_urceolata|comp15143_c0_seq1_2_8.3e-35</name>
                                <branch_length>0.461673832</branch_length>
                              </clade>
                              <clade>
                                <name>09_Salpingoeca_kvevrii|comp6845_c3_seq1_2_1e-41</name>
                                <branch_length>0.491098861</branch_length>
                              </clade>
                              <clade>
                                <branch_length>0.521036575</branch_length>
                                <confidence type="unknown">100</confidence>
                                <clade>
                                  <name>17_Codosiga_hollandica|comp56936_c0_seq2_3_2e-35</name>
                                  <branch_length>1.62E-6</branch_length>
                                </clade>
                                <clade>
                                  <name>17_Codosiga_hollandica|comp56936_c0_seq5_2_1.9e-35</name>
                                  <branch_length>1.62E-6</branch_length>
                                </clade>
                              </clade>
                              <clade>
                                <branch_length>0.315326512</branch_length>
                                <confidence type="unknown">100</confidence>
                                <clade>
                                  <name>19_Mylnosiga_fluctuans|comp9538_c0_seq1_3_1.1e-32</name>
                                  <branch_length>0.302067678</branch_length>
                                </clade>
                                <clade>
                                  <name>18_Salpingoeca_helianthica|comp14012_c0_seq5_3_6.3e-34</name>
                                  <branch_length>0.341853826</branch_length>
                                </clade>
                              </clade>
                            </clade>
                          </clade>
                          <clade>
                            <branch_length>0.137576138</branch_length>
                            <confidence type="unknown">96</confidence>
                            <clade>
                              <name>53_Chondrus_crispus|546303526_2_4.3e-26</name>
                              <branch_length>0.901200304</branch_length>
                            </clade>
                            <clade>
                              <name>48_Yarrowia_lipolytica|YALI0B07557g_3_4.2e-27</name>
                              <branch_length>1.006696595</branch_length>
                            </clade>
                          </clade>
                        </clade>
                        <clade>
                          <branch_length>0.24499326</branch_length>
                          <confidence type="unknown">100</confidence>
                          <clade>
                            <name>55_Emiliania_huxleyi|428552_3_2.3e-27</name>
                            <branch_length>0.363203733</branch_length>
                          </clade>
                          <clade>
                            <branch_length>0.036977531</branch_length>
                            <confidence type="unknown">58</confidence>
                            <clade>
                              <name>44_Coprinopsis_cinerea|CC1G_00279T0_2_1.2e-25</name>
                              <branch_length>0.40077871</branch_length>
                            </clade>
                            <clade>
                              <name>43_Capsaspora_owczarzaki|CAOG_08140T0_3_1.6e-34</name>
                              <branch_length>0.323923071</branch_length>
                            </clade>
                            <clade>
                              <branch_length>0.122295081</branch_length>
                              <confidence type="unknown">97</confidence>
                              <clade>
                                <branch_length>0.049786093</branch_length>
                                <confidence type="unknown">99</confidence>
                                <clade>
                                  <name>09_Salpingoeca_kvevrii|comp12314_c0_seq1_3_1.1e-33</name>
                                  <branch_length>0.19774729</branch_length>
                                </clade>
                                <clade>
                                  <branch_length>0.106087817</branch_length>
                                  <confidence type="unknown">83</confidence>
                                  <clade>
                                    <branch_length>0.143098791</branch_length>
                                    <confidence type="unknown">100</confidence>
                                    <clade>
                                      <name>07_Stephanoeca_diplocostata_FR|comp7107_c0_seq1_2_5.9e-26</name>
                                      <branch_length>0.244803214</branch_length>
                                    </clade>
                                    <clade>
                                      <name>10_Didymoeca_costata|comp10031_c0_seq1_2_5.3e-28</name>
                                      <branch_length>0.372266106</branch_length>
                                    </clade>
                                  </clade>
                                  <clade>
                                    <name>15_Hartaetosiga_balthica|comp6843_c0_seq1_3_2.6e-23</name>
                                    <branch_length>0.317833696</branch_length>
                                  </clade>
                                </clade>
                                <clade>
                                  <name>21_Salpingoeca_rosetta|PTSG_07771T0_3_7.9e-34</name>
                                  <branch_length>0.225294264</branch_length>
                                </clade>
                                <clade>
                                  <branch_length>0.128757246</branch_length>
                                  <confidence type="unknown">99</confidence>
                                  <clade>
                                    <name>11_Choanoeca_perplexa|comp13284_c0_seq1_2_3.9e-30</name>
                                    <branch_length>0.221035599</branch_length>
                                  </clade>
                                  <clade>
                                    <name>20_Monosiga_brevicollis|476_2_1.2e-35</name>
                                    <branch_length>0.11829016</branch_length>
                                  </clade>
                                </clade>
                              </clade>
                              <clade>
                                <branch_length>0.044176309</branch_length>
                                <confidence type="unknown">97</confidence>
                                <clade>
                                  <branch_length>0.098266152</branch_length>
                                  <confidence type="unknown">100</confidence>
                                  <clade>
                                    <name>18_Salpingoeca_helianthica|comp7551_c0_seq1_2_5e-39</name>
                                    <branch_length>0.141676919</branch_length>
                                  </clade>
                                  <clade>
                                    <name>19_Mylnosiga_fluctuans|comp10662_c0_seq1_2_2.1e-40</name>
                                    <branch_length>0.10893279</branch_length>
                                  </clade>
                                </clade>
                                <clade>
                                  <branch_length>0.162418925</branch_length>
                                  <confidence type="unknown">100</confidence>
                                  <clade>
                                    <name>03_Salpingoeca_punica|comp16980_c1_seq5_3_1.2e-34</name>
                                    <branch_length>8.15225E-4</branch_length>
                                  </clade>
                                  <clade>
                                    <name>03_Salpingoeca_punica|comp16980_c1_seq2_2_1.1e-36</name>
                                    <branch_length>0.002746419</branch_length>
                                  </clade>
                                </clade>
                              </clade>
                            </clade>
                            <clade>
                              <branch_length>0.147569646</branch_length>
                              <confidence type="unknown">66</confidence>
                              <clade>
                                <name>36_Pristionchus_pacificus|PPA12569_3_9.8e-16</name>
                                <branch_length>0.328586678</branch_length>
                              </clade>
                              <clade>
                                <branch_length>0.087356619</branch_length>
                                <confidence type="unknown">91</confidence>
                                <clade>
                                  <name>27_Nematostella_vectensis|85083_3_6e-21</name>
                                  <branch_length>0.257313459</branch_length>
                                </clade>
                                <clade>
                                  <branch_length>0.050934929</branch_length>
                                  <confidence type="unknown">62</confidence>
                                  <clade>
                                    <name>42_Helobdella_robusta|76588_3_1.8e-21</name>
                                    <branch_length>0.248836557</branch_length>
                                  </clade>
                                  <clade>
                                    <branch_length>0.062366985</branch_length>
                                    <confidence type="unknown">50</confidence>
                                    <clade>
                                      <name>29_Trichoplax_adhaerens|53763_3_1.1e-15</name>
                                      <branch_length>0.363137946</branch_length>
                                    </clade>
                                    <clade>
                                      <branch_length>0.246693796</branch_length>
                                      <confidence type="unknown">100</confidence>
                                      <clade>
                                        <name>34_Strongylocentrotus_purpuratus|390363688_2_1.4e-20</name>
                                        <branch_length>1.62E-6</branch_length>
                                      </clade>
                                      <clade>
                                        <name>34_Strongylocentrotus_purpuratus|390363686_3_2e-20</name>
                                        <branch_length>1.62E-6</branch_length>
                                      </clade>
                                    </clade>
                                  </clade>
                                </clade>
                              </clade>
                            </clade>
                            <clade>
                              <branch_length>0.160814894</branch_length>
                              <confidence type="unknown">54</confidence>
                              <clade>
                                <name>25_Mnemiopsis_leidyi|ML07306_3_6.7e-17</name>
                                <branch_length>0.414562544</branch_length>
                              </clade>
                              <clade>
                                <name>56_Guillardia_theta|95026_3_2.4e-27</name>
                                <branch_length>0.415161437</branch_length>
                              </clade>
                            </clade>
                          </clade>
                        </clade>
                      </clade>
                    </clade>
                    <clade>
                      <branch_length>0.188504711</branch_length>
                      <confidence type="unknown">100</confidence>
                      <clade>
                        <name>59_Thalassiosira_pseudonana|41829_1_4.4e-122</name>
                        <branch_length>0.382124071</branch_length>
                      </clade>
                      <clade>
                        <branch_length>0.048893515</branch_length>
                        <confidence type="unknown">54</confidence>
                        <clade>
                          <branch_length>0.470559123</branch_length>
                          <confidence type="unknown">100</confidence>
                          <clade>
                            <name>58_Bigelowiella_natans|48294_2_2.3e-112</name>
                            <branch_length>0.076018012</branch_length>
                          </clade>
                          <clade>
                            <name>58_Bigelowiella_natans|36951_3_1e-111</name>
                            <branch_length>0.096724113</branch_length>
                          </clade>
                        </clade>
                        <clade>
                          <branch_length>0.084339332</branch_length>
                          <confidence type="unknown">99</confidence>
                          <clade>
                            <branch_length>0.085903799</branch_length>
                            <confidence type="unknown">98</confidence>
                            <clade>
                              <name>56_Guillardia_theta|150047_1_2.1e-267</name>
                              <branch_length>0.170494428</branch_length>
                            </clade>
                            <clade>
                              <branch_length>0.058684521</branch_length>
                              <confidence type="unknown">55</confidence>
                              <clade>
                                <name>58_Bigelowiella_natans|73872_1_1.8e-179</name>
                                <branch_length>0.531807993</branch_length>
                              </clade>
                              <clade>
                                <branch_length>0.129683475</branch_length>
                                <confidence type="unknown">100</confidence>
                                <clade>
                                  <name>55_Emiliania_huxleyi|462457_1_1.1e-245</name>
                                  <branch_length>1.62E-6</branch_length>
                                </clade>
                                <clade>
                                  <name>55_Emiliania_huxleyi|442948_2_4.5e-70</name>
                                  <branch_length>1.62E-6</branch_length>
                                </clade>
                              </clade>
                            </clade>
                            <clade>
                              <branch_length>0.12681787</branch_length>
                              <confidence type="unknown">100</confidence>
                              <clade>
                                <branch_length>0.009274103</branch_length>
                                <confidence type="unknown">100</confidence>
                                <clade>
                                  <name>52_Chlamydomonas_reinhardtii|g5919.t1_2_2.1e-272</name>
                                  <branch_length>1.62E-6</branch_length>
                                </clade>
                                <clade>
                                  <name>52_Chlamydomonas_reinhardtii|Cre06.g263450.t1.2_1_2.1e-272</name>
                                  <branch_length>1.62E-6</branch_length>
                                </clade>
                              </clade>
                              <clade>
                                <name>52_Chlamydomonas_reinhardtii|Cre12.g498600.t1.2_3_3.8e-272</name>
                                <branch_length>1.62E-6</branch_length>
                              </clade>
                            </clade>
                          </clade>
                          <clade>
                            <branch_length>0.131919175</branch_length>
                            <confidence type="unknown">70</confidence>
                            <clade>
                              <branch_length>0.047280019</branch_length>
                              <confidence type="unknown">88</confidence>
                              <clade>
                                <branch_length>0.124679923</branch_length>
                                <confidence type="unknown">100</confidence>
                                <clade>
                                  <name>10_Didymoeca_costata|comp5003_c0_seq1_3_3.4e-25</name>
                                  <branch_length>0.119421087</branch_length>
                                </clade>
                                <clade>
                                  <name>10_Didymoeca_costata|comp16593_c0_seq1_1_2.6e-242</name>
                                  <branch_length>1.62E-6</branch_length>
                                </clade>
                              </clade>
                              <clade>
                                <name>01_Diaphanoeca_grandis|comp21622_c0_seq1_1_1.2e-230</name>
                                <branch_length>0.154334651</branch_length>
                              </clade>
                            </clade>
                            <clade>
                              <name>02_Acanthoeca_spectabilis|comp104338_c0_seq1_2_3e-89</name>
                              <branch_length>0.561860903</branch_length>
                            </clade>
                            <clade>
                              <branch_length>0.050460727</branch_length>
                              <confidence type="unknown">64</confidence>
                              <clade>
                                <name>08_Helgoeca_nana|comp11954_c0_seq1_1_9.2e-258</name>
                                <branch_length>0.04783207</branch_length>
                              </clade>
                              <clade>
                                <name>02_Acanthoeca_spectabilis|comp16872_c0_seq1_1_5.9e-265</name>
                                <branch_length>0.055587195</branch_length>
                              </clade>
                              <clade>
                                <name>14_Savillea_parva|comp11742_c0_seq1_1_5.6e-264</name>
                                <branch_length>0.070258254</branch_length>
                              </clade>
                            </clade>
                            <clade>
                              <branch_length>0.078885721</branch_length>
                              <confidence type="unknown">52</confidence>
                              <clade>
                                <name>16_Salpingoeca_dolichothecata|comp12789_c0_seq1_3_2.7e-40</name>
                                <branch_length>1.62E-6</branch_length>
                              </clade>
                              <clade>
                                <branch_length>0.077274755</branch_length>
                                <confidence type="unknown">100</confidence>
                                <clade>
                                  <name>07_Stephanoeca_diplocostata_AU|comp13645_c0_seq1_1_4.8e-252</name>
                                  <branch_length>1.62E-6</branch_length>
                                </clade>
                                <clade>
                                  <name>07_Stephanoeca_diplocostata_FR|comp25424_c0_seq1_1_5.2e-252</name>
                                  <branch_length>1.62E-6</branch_length>
                                </clade>
                              </clade>
                            </clade>
                          </clade>
                          <clade>
                            <name>04_Salpingoeca_urceolata|comp4854_c0_seq1_1_1.6e-268</name>
                            <branch_length>0.159061355</branch_length>
                          </clade>
                          <clade>
                            <name>09_Salpingoeca_kvevrii|comp11121_c0_seq1_1_2.6e-281</name>
                            <branch_length>0.154923503</branch_length>
                          </clade>
                          <clade>
                            <branch_length>0.126680865</branch_length>
                            <confidence type="unknown">56</confidence>
                            <clade>
                              <branch_length>0.029290689</branch_length>
                              <confidence type="unknown">77</confidence>
                              <clade>
                                <name>21_Salpingoeca_rosetta|PTSG_02256T0_1_1.9e-287</name>
                                <branch_length>0.049248716</branch_length>
                              </clade>
                              <clade>
                                <branch_length>0.019360348</branch_length>
                                <confidence type="unknown">63</confidence>
                                <clade>
                                  <branch_length>0.076342483</branch_length>
                                  <confidence type="unknown">99</confidence>
                                  <clade>
                                    <name>15_Hartaetosiga_balthica|comp2194_c0_seq1_1_1.3e-260</name>
                                    <branch_length>0.075604173</branch_length>
                                  </clade>
                                  <clade>
                                    <branch_length>0.030279167</branch_length>
                                    <confidence type="unknown">99</confidence>
                                    <clade>
                                      <name>05_Hartaetosiga_gracilis|comp12034_c1_seq1_1_6.4e-186</name>
                                      <branch_length>1.62E-6</branch_length>
                                    </clade>
                                    <clade>
                                      <name>05_Hartaetosiga_gracilis|comp12034_c0_seq1_2_2e-81</name>
                                      <branch_length>0.015325384</branch_length>
                                    </clade>
                                  </clade>
                                </clade>
                                <clade>
                                  <name>12_Salpingoeca_infusionum|comp16162_c0_seq1_1_4.7e-274</name>
                                  <branch_length>0.113890583</branch_length>
                                </clade>
                                <clade>
                                  <name>13_Microstomoeca_roanoka|comp14746_c1_seq1_2_2.2e-85</name>
                                  <branch_length>0.038673584</branch_length>
                                </clade>
                                <clade>
                                  <name>13_Microstomoeca_roanoka|comp14746_c0_seq1_1_2.3e-198</name>
                                  <branch_length>0.04541124</branch_length>
                                </clade>
                              </clade>
                            </clade>
                            <clade>
                              <branch_length>0.027579271</branch_length>
                              <confidence type="unknown">80</confidence>
                              <clade>
                                <name>11_Choanoeca_perplexa|comp17832_c0_seq1_1_2.6e-286</name>
                                <branch_length>0.116477005</branch_length>
                              </clade>
                              <clade>
                                <name>20_Monosiga_brevicollis|36952_1_0</name>
                                <branch_length>0.042634205</branch_length>
                              </clade>
                            </clade>
                          </clade>
                          <clade>
                            <branch_length>0.132748658</branch_length>
                            <confidence type="unknown">91</confidence>
                            <clade>
                              <name>03_Salpingoeca_punica|comp15798_c4_seq1_1_1.4e-274</name>
                              <branch_length>0.062755004</branch_length>
                            </clade>
                            <clade>
                              <branch_length>0.075197458</branch_length>
                              <confidence type="unknown">95</confidence>
                              <clade>
                                <name>06_Salpingoeca_macrocollata|comp19916_c1_seq1_3_3.4e-99</name>
                                <branch_length>0.394188853</branch_length>
                              </clade>
                              <clade>
                                <branch_length>0.039039902</branch_length>
                                <confidence type="unknown">100</confidence>
                                <clade>
                                  <name>06_Salpingoeca_macrocollata|comp14078_c0_seq2_1_1.5e-275</name>
                                  <branch_length>1.62E-6</branch_length>
                                </clade>
                                <clade>
                                  <name>06_Salpingoeca_macrocollata|comp14078_c0_seq4_2_1.5e-275</name>
                                  <branch_length>1.62E-6</branch_length>
                                </clade>
                              </clade>
                            </clade>
                          </clade>
                          <clade>
                            <name>02_Acanthoeca_spectabilis|comp63157_c0_seq1_3_1.1e-31</name>
                            <branch_length>0.482516355</branch_length>
                          </clade>
                          <clade>
                            <name>53_Chondrus_crispus|546303699_1_5e-250</name>
                            <branch_length>0.241211359</branch_length>
                          </clade>
                        </clade>
                      </clade>
                    </clade>
                  </clade>
                </clade>
                <clade>
                  <name>16_Salpingoeca_dolichothecata|comp114844_c0_seq1_2_1.2e-42</name>
                  <branch_length>0.417733713</branch_length>
                </clade>
              </clade>
              <clade>
                <branch_length>0.097627834</branch_length>
                <confidence type="unknown">100</confidence>
                <clade>
                  <name>50_Acanthamoeba_castellanii|ACA1_141420_3_2.3e-55</name>
                  <branch_length>1.62E-6</branch_length>
                </clade>
                <clade>
                  <name>50_Acanthamoeba_castellanii|ACA1_204600_1_1.9e-71</name>
                  <branch_length>0.001327411</branch_length>
                </clade>
              </clade>
              <clade>
                <name>50_Acanthamoeba_castellanii|ACA1_098360_2_3.7e-70</name>
                <branch_length>0.338083392</branch_length>
              </clade>
              <clade>
                <name>37_Daphnia_pulex|125451_3_3.2e-26</name>
                <branch_length>0.197865754</branch_length>
              </clade>
            </clade>
            <clade>
              <branch_length>0.169450197</branch_length>
              <confidence type="unknown">83</confidence>
              <clade>
                <branch_length>0.059834715</branch_length>
                <confidence type="unknown">72</confidence>
                <clade>
                  <branch_length>0.08685473</branch_length>
                  <confidence type="unknown">100</confidence>
                  <clade>
                    <name>45_Rhizopus_oryzae|RO3G_15047T0_1_3.6e-91</name>
                    <branch_length>0.007627638</branch_length>
                  </clade>
                  <clade>
                    <branch_length>0.006671221</branch_length>
                    <confidence type="unknown">74</confidence>
                    <clade>
                      <name>45_Rhizopus_oryzae|RO3G_11153T0_2_5.4e-90</name>
                      <branch_length>0.004045188</branch_length>
                    </clade>
                    <clade>
                      <name>45_Rhizopus_oryzae|RO3G_15351T0_3_1.7e-88</name>
                      <branch_length>0.014216148</branch_length>
                    </clade>
                  </clade>
                </clade>
                <clade>
                  <branch_length>0.086361796</branch_length>
                  <confidence type="unknown">100</confidence>
                  <clade>
                    <name>46_Schizosaccharomyces_pombe|SPAC23A1.10.1_1_7.9e-90</name>
                    <branch_length>9.78169E-4</branch_length>
                  </clade>
                  <clade>
                    <branch_length>0.001804141</branch_length>
                    <confidence type="unknown">86</confidence>
                    <clade>
                      <name>46_Schizosaccharomyces_pombe|SPCC794.09c.1_3_2e-88</name>
                      <branch_length>0.004900061</branch_length>
                    </clade>
                    <clade>
                      <name>46_Schizosaccharomyces_pombe|SPBC839.15c.1_2_2.8e-89</name>
                      <branch_length>0.003487738</branch_length>
                    </clade>
                  </clade>
                </clade>
              </clade>
              <clade>
                <name>48_Yarrowia_lipolytica|YALI0C09141g_1_2.6e-99</name>
                <branch_length>0.104430098</branch_length>
              </clade>
              <clade>
                <name>44_Coprinopsis_cinerea|CC1G_06744T0_1_4.2e-97</name>
                <branch_length>0.092815121</branch_length>
              </clade>
              <clade>
                <name>47_Homolaphlyctis_polyrhiza|hpol2798_1_1.7e-89</name>
                <branch_length>0.121249039</branch_length>
              </clade>
            </clade>
            <clade>
              <name>16_Salpingoeca_dolichothecata|comp7178_c0_seq1_1_4.7e-103</name>
              <branch_length>0.222110112</branch_length>
            </clade>
            <clade>
              <name>56_Guillardia_theta|84201_2_1.6e-83</name>
              <branch_length>0.298673574</branch_length>
            </clade>
            <clade>
              <branch_length>0.231100091</branch_length>
              <confidence type="unknown">100</confidence>
              <clade>
                <name>51_Arabidopsis_thaliana|AT1G07920.1_2_2.5e-87</name>
                <branch_length>1.62E-6</branch_length>
              </clade>
              <clade>
                <name>51_Arabidopsis_thaliana|AT1G07930.1_1_1.2e-87</name>
                <branch_length>0.009317856</branch_length>
              </clade>
              <clade>
                <name>51_Arabidopsis_thaliana|AT1G07940.1_3_2.9e-87</name>
                <branch_length>0.002118492</branch_length>
              </clade>
            </clade>
            <clade>
              <name>25_Mnemiopsis_leidyi|ML20395_1_4.7e-82</name>
              <branch_length>0.313996812</branch_length>
            </clade>
          </clade>
        </clade>
        <clade>
          <name>28_Acropora_digitifera|08068_1_8.5e-79</name>
          <branch_length>0.295832016</branch_length>
        </clade>
        <clade>
          <name>22_Oscarella_pearsei|comp8888_c0_seq1_1_4.1e-80</name>
          <branch_length>0.313934028</branch_length>
        </clade>
        <clade>
          <name>42_Helobdella_robusta|100373_1_2.6e-74</name>
          <branch_length>0.33684708</branch_length>
        </clade>
      </clade>
    </clade>
  </clade>
</phylogeny>
<phylogeny rooted="false" rerootable="true">
  <name>HSP70</name>
  <clade>
    <clade>
      <branch_length>0.246796933</branch_length>
      <confidence type="unknown">100</confidence>
      <clade>
        <name>28_Acropora_digitifera|22354_3_4.5e-204</name>
        <branch_length>0.051814274</branch_length>
      </clade>
      <clade>
        <name>28_Acropora_digitifera|05375_1_1.4e-209</name>
        <branch_length>0.024947857</branch_length>
      </clade>
    </clade>
    <clade>
      <branch_length>0.062797291</branch_length>
      <confidence type="unknown">60</confidence>
      <clade>
        <branch_length>0.280129511</branch_length>
        <confidence type="unknown">100</confidence>
        <clade>
          <name>24_Amphimedon_queenslandica|Aqu1.219982_1_8.1e-221</name>
          <branch_length>0.054702006</branch_length>
        </clade>
        <clade>
          <name>24_Amphimedon_queenslandica|Aqu1.219984_2_5.6e-216</name>
          <branch_length>0.073073116</branch_length>
        </clade>
      </clade>
      <clade>
        <name>23_Ephydatia_muelleri|comp67228_c0_seq1_1_2.4e-278</name>
        <branch_length>0.335807448</branch_length>
      </clade>
      <clade>
        <branch_length>0.259266472</branch_length>
        <confidence type="unknown">91</confidence>
        <clade>
          <name>33_Branchiostoma_floridae|274231_3_4.2e-252</name>
          <branch_length>0.23846419</branch_length>
        </clade>
        <clade>
          <branch_length>0.042246421</branch_length>
          <confidence type="unknown">64</confidence>
          <clade>
            <branch_length>0.270331786</branch_length>
            <confidence type="unknown">100</confidence>
            <clade>
              <name>41_Capitella_teleta|115950_3_8e-220</name>
              <branch_length>0.10553198</branch_length>
            </clade>
            <clade>
              <name>41_Capitella_teleta|149823_2_1.5e-229</name>
              <branch_length>0.045152737</branch_length>
            </clade>
          </clade>
          <clade>
            <branch_length>0.043807735</branch_length>
            <confidence type="unknown">73</confidence>
            <clade>
              <name>22_Oscarella_pearsei|comp39274_c3_seq1_2_1.3e-215</name>
              <branch_length>0.336483916</branch_length>
            </clade>
            <clade>
              <branch_length>0.035638809</branch_length>
              <confidence type="unknown">58</confidence>
              <clade>
                <name>27_Nematostella_vectensis|234533_3_2.4e-221</name>
                <branch_length>0.228777922</branch_length>
              </clade>
              <clade>
                <branch_length>0.074527126</branch_length>
                <confidence type="unknown">92</confidence>
                <clade>
                  <name>30_Ciona_intestinalis|ENSCINT00000011757_2_6.1e-190</name>
                  <branch_length>0.343202364</branch_length>
                </clade>
                <clade>
                  <branch_length>0.145442371</branch_length>
                  <confidence type="unknown">100</confidence>
                  <clade>
                    <name>40_Lottia_gigantea|198956_1_7.2e-209</name>
                    <branch_length>0.096491854</branch_length>
                  </clade>
                  <clade>
                    <branch_length>0.112154443</branch_length>
                    <confidence type="unknown">100</confidence>
                    <clade>
                      <name>40_Lottia_gigantea|209056_3_3.3e-194</name>
                      <branch_length>0.01672917</branch_length>
                    </clade>
                    <clade>
                      <name>40_Lottia_gigantea|181897_2_1.2e-195</name>
                      <branch_length>0.006371159</branch_length>
                    </clade>
                  </clade>
                </clade>
              </clade>
            </clade>
          </clade>
        </clade>
      </clade>
      <clade>
        <branch_length>0.194248481</branch_length>
        <confidence type="unknown">61</confidence>
        <clade>
          <branch_length>0.042026451</branch_length>
          <confidence type="unknown">91</confidence>
          <clade>
            <branch_length>0.164777721</branch_length>
            <confidence type="unknown">100</confidence>
            <clade>
              <name>31_Gasterosteus_aculeatus|ENSGACT00000017288_3_8.7e-280</name>
              <branch_length>1.747E-6</branch_length>
            </clade>
            <clade>
              <name>31_Gasterosteus_aculeatus|ENSGACT00000017287_1_3.1e-280</name>
              <branch_length>0.001520834</branch_length>
            </clade>
            <clade>
              <name>31_Gasterosteus_aculeatus|ENSGACT00000017285_2_7.3e-280</name>
              <branch_length>0.001521849</branch_length>
            </clade>
          </clade>
          <clade>
            <branch_length>0.158789231</branch_length>
            <confidence type="unknown">100</confidence>
            <clade>
              <name>32_Mus_musculus|93004086_3_8e-291</name>
              <branch_length>1.747E-6</branch_length>
            </clade>
            <clade>
              <name>32_Mus_musculus|50345977_2_7.3e-291</name>
              <branch_length>3.493E-6</branch_length>
            </clade>
            <clade>
              <name>32_Mus_musculus|568978834_1_7.2e-291</name>
              <branch_length>3.493E-6</branch_length>
            </clade>
          </clade>
        </clade>
        <clade>
          <branch_length>0.111871302</branch_length>
          <confidence type="unknown">100</confidence>
          <clade>
            <name>33_Branchiostoma_floridae|130017_1_0</name>
            <branch_length>0.003854064</branch_length>
          </clade>
          <clade>
            <name>33_Branchiostoma_floridae|114843_2_0</name>
            <branch_length>0.012403428</branch_length>
          </clade>
        </clade>
      </clade>
      <clade>
        <name>41_Capitella_teleta|159224_1_1.6e-283</name>
        <branch_length>0.36898696</branch_length>
      </clade>
      <clade>
        <branch_length>0.329077775</branch_length>
        <confidence type="unknown">100</confidence>
        <clade>
          <name>38_Drosophila_melanogaster|FBtr0083060_3_0</name>
          <branch_length>1.747E-6</branch_length>
        </clade>
        <clade>
          <name>38_Drosophila_melanogaster|FBtr0083055_2_0</name>
          <branch_length>3.493E-6</branch_length>
        </clade>
        <clade>
          <name>38_Drosophila_melanogaster|FBtr0083058_1_0</name>
          <branch_length>3.493E-6</branch_length>
        </clade>
      </clade>
      <clade>
        <branch_length>0.312808084</branch_length>
        <confidence type="unknown">100</confidence>
        <clade>
          <name>35_Caenorhabditis_elegans|F26D10.3_1_1.2e-280</name>
          <branch_length>0.127460901</branch_length>
        </clade>
        <clade>
          <branch_length>0.03796473</branch_length>
          <confidence type="unknown">100</confidence>
          <clade>
            <name>36_Pristionchus_pacificus|PPA27506_2_1.7e-291</name>
            <branch_length>0.080035732</branch_length>
          </clade>
          <clade>
            <branch_length>0.028212401</branch_length>
            <confidence type="unknown">96</confidence>
            <clade>
              <name>36_Pristionchus_pacificus|PPA05202_1_1.4e-302</name>
              <branch_length>0.024347503</branch_length>
            </clade>
            <clade>
              <name>36_Pristionchus_pacificus|PPA06991_3_2.1e-255</name>
              <branch_length>0.183510958</branch_length>
            </clade>
          </clade>
        </clade>
      </clade>
      <clade>
        <branch_length>0.275110988</branch_length>
        <confidence type="unknown">82</confidence>
        <clade>
          <branch_length>0.04383428</branch_length>
          <confidence type="unknown">99</confidence>
          <clade>
            <name>43_Capsaspora_owczarzaki|CAOG_04171T0_2_2.8e-294</name>
            <branch_length>0.177562414</branch_length>
          </clade>
          <clade>
            <name>43_Capsaspora_owczarzaki|CAOG_00845T0_1_0</name>
            <branch_length>0.063834814</branch_length>
          </clade>
        </clade>
        <clade>
          <name>17_Codosiga_hollandica|comp56372_c0_seq1_1_0</name>
          <branch_length>0.117266085</branch_length>
        </clade>
      </clade>
      <clade>
        <branch_length>0.396317313</branch_length>
        <confidence type="unknown">100</confidence>
        <clade>
          <branch_length>0.099509003</branch_length>
          <confidence type="unknown">100</confidence>
          <clade>
            <name>16_Salpingoeca_dolichothecata|comp26705_c0_seq6_3_1.6e-265</name>
            <branch_length>0.095313383</branch_length>
          </clade>
          <clade>
            <name>16_Salpingoeca_dolichothecata|comp26705_c0_seq2_2_7.9e-271</name>
            <branch_length>1.747E-6</branch_length>
          </clade>
        </clade>
        <clade>
          <name>16_Salpingoeca_dolichothecata|comp26705_c0_seq1_1_2.8e-275</name>
          <branch_length>0.073364455</branch_length>
        </clade>
      </clade>
      <clade>
        <branch_length>0.322994557</branch_length>
        <confidence type="unknown">100</confidence>
        <clade>
          <name>18_Salpingoeca_helianthica|comp15440_c5_seq1_1_5e-192</name>
          <branch_length>0.086329772</branch_length>
        </clade>
        <clade>
          <name>19_Mylnosiga_fluctuans|comp10254_c0_seq1_1_0</name>
          <branch_length>0.063133412</branch_length>
        </clade>
      </clade>
      <clade>
        <name>53_Chondrus_crispus|546304661_1_3.5e-258</name>
        <branch_length>0.570127536</branch_length>
      </clade>
      <clade>
        <branch_length>0.544404681</branch_length>
        <confidence type="unknown">100</confidence>
        <clade>
          <name>55_Emiliania_huxleyi|442340_2_9e-279</name>
          <branch_length>1.747E-6</branch_length>
        </clade>
        <clade>
          <name>55_Emiliania_huxleyi|441734_1_9e-279</name>
          <branch_length>1.747E-6</branch_length>
        </clade>
      </clade>
      <clade>
        <branch_length>0.419219662</branch_length>
        <confidence type="unknown">100</confidence>
        <clade>
          <name>50_Acanthamoeba_castellanii|ACA1_380320_2_3.1e-268</name>
          <branch_length>0.092557493</branch_length>
        </clade>
        <clade>
          <name>50_Acanthamoeba_castellanii|ACA1_393800_1_5.1e-289</name>
          <branch_length>0.040941344</branch_length>
        </clade>
      </clade>
      <clade>
        <branch_length>0.575168814</branch_length>
        <confidence type="unknown">100</confidence>
        <clade>
          <name>51_Arabidopsis_thaliana|AT5G02500.1_1_4.6e-240</name>
          <branch_length>0.054298638</branch_length>
        </clade>
        <clade>
          <branch_length>0.126485937</branch_length>
          <confidence type="unknown">100</confidence>
          <clade>
            <name>51_Arabidopsis_thaliana|AT3G09440.2_2_3.9e-232</name>
            <branch_length>1.747E-6</branch_length>
          </clade>
          <clade>
            <name>51_Arabidopsis_thaliana|AT3G09440.1_3_4.4e-232</name>
            <branch_length>1.747E-6</branch_length>
          </clade>
        </clade>
      </clade>
      <clade>
        <name>52_Chlamydomonas_reinhardtii|Cre08.g372100.t1.2_1_7.8e-285</name>
        <branch_length>0.528875354</branch_length>
      </clade>
      <clade>
        <branch_length>0.382872634</branch_length>
        <confidence type="unknown">84</confidence>
        <clade>
          <branch_length>0.111849914</branch_length>
          <confidence type="unknown">100</confidence>
          <clade>
            <branch_length>0.020514389</branch_length>
            <confidence type="unknown">98</confidence>
            <clade>
              <name>48_Yarrowia_lipolytica|YALI0D08184g_1_8.1e-288</name>
              <branch_length>0.026225752</branch_length>
            </clade>
            <clade>
              <name>48_Yarrowia_lipolytica|YALI0F25289g_3_1.1e-285</name>
              <branch_length>0.044636203</branch_length>
            </clade>
          </clade>
          <clade>
            <name>48_Yarrowia_lipolytica|YALI0D22352g_2_1.1e-285</name>
            <branch_length>0.067522726</branch_length>
          </clade>
        </clade>
        <clade>
          <branch_length>0.02812207</branch_length>
          <confidence type="unknown">59</confidence>
          <clade>
            <branch_length>0.037598978</branch_length>
            <confidence type="unknown">88</confidence>
            <clade>
              <branch_length>0.058893759</branch_length>
              <confidence type="unknown">90</confidence>
              <clade>
                <branch_length>0.069069312</branch_length>
                <confidence type="unknown">100</confidence>
                <clade>
                  <name>45_Rhizopus_oryzae|RO3G_05488T0_1_9.3e-249</name>
                  <branch_length>0.067117668</branch_length>
                </clade>
                <clade>
                  <branch_length>0.089137353</branch_length>
                  <confidence type="unknown">100</confidence>
                  <clade>
                    <name>45_Rhizopus_oryzae|RO3G_12888T0_3_2.3e-233</name>
                    <branch_length>0.072802212</branch_length>
                  </clade>
                  <clade>
                    <name>45_Rhizopus_oryzae|RO3G_10403T0_2_1.6e-233</name>
                    <branch_length>0.062678902</branch_length>
                  </clade>
                </clade>
              </clade>
              <clade>
                <branch_length>0.117030075</branch_length>
                <confidence type="unknown">100</confidence>
                <clade>
                  <name>46_Schizosaccharomyces_pombe|SPCC1739.13.1_1_6.3e-252</name>
                  <branch_length>0.04212356</branch_length>
                </clade>
                <clade>
                  <name>46_Schizosaccharomyces_pombe|SPAC13G7.02c.1_2_1.2e-229</name>
                  <branch_length>0.140558506</branch_length>
                </clade>
              </clade>
            </clade>
            <clade>
              <name>44_Coprinopsis_cinerea|CC1G_13924T0_1_1.2e-274</name>
              <branch_length>0.121128272</branch_length>
            </clade>
          </clade>
          <clade>
            <name>47_Homolaphlyctis_polyrhiza|hpol19264_1_0</name>
            <branch_length>0.149481501</branch_length>
          </clade>
        </clade>
      </clade>
      <clade>
        <branch_length>0.505601589</branch_length>
        <confidence type="unknown">99</confidence>
        <clade>
          <name>58_Bigelowiella_natans|50519_2_1.4e-205</name>
          <branch_length>0.323996516</branch_length>
        </clade>
        <clade>
          <name>58_Bigelowiella_natans|87650_3_8.9e-203</name>
          <branch_length>0.443622247</branch_length>
        </clade>
      </clade>
      <clade>
        <branch_length>0.482702779</branch_length>
        <confidence type="unknown">100</confidence>
        <clade>
          <branch_length>0.25480904</branch_length>
          <confidence type="unknown">100</confidence>
          <clade>
            <name>10_Didymoeca_costata|comp17154_c0_seq1_3_3.9e-151</name>
            <branch_length>0.38787746</branch_length>
          </clade>
          <clade>
            <name>14_Savillea_parva|comp6144_c0_seq1_3_8e-154</name>
            <branch_length>0.293267092</branch_length>
          </clade>
          <clade>
            <name>01_Diaphanoeca_grandis|comp33994_c0_seq1_2_1.6e-191</name>
            <branch_length>0.247066417</branch_length>
          </clade>
        </clade>
        <clade>
          <branch_length>0.143493214</branch_length>
          <confidence type="unknown">100</confidence>
          <clade>
            <name>46_Schizosaccharomyces_pombe|SPBC1709.05.1_3_7.1e-187</name>
            <branch_length>0.289984551</branch_length>
          </clade>
          <clade>
            <name>44_Coprinopsis_cinerea|CC1G_13982T0_2_5.5e-217</name>
            <branch_length>0.156824472</branch_length>
          </clade>
        </clade>
      </clade>
      <clade>
        <branch_length>0.495007318</branch_length>
        <confidence type="unknown">100</confidence>
        <clade>
          <name>56_Guillardia_theta|161716_3_2.4e-261</name>
          <branch_length>0.139283439</branch_length>
        </clade>
        <clade>
          <branch_length>0.101048652</branch_length>
          <confidence type="unknown">100</confidence>
          <clade>
            <name>56_Guillardia_theta|107992_1_1.4e-284</name>
            <branch_length>1.747E-6</branch_length>
          </clade>
          <clade>
            <name>56_Guillardia_theta|70779_2_1.8e-283</name>
            <branch_length>0.007955609</branch_length>
          </clade>
        </clade>
      </clade>
      <clade>
        <name>59_Thalassiosira_pseudonana|269120_1_5.5e-261</name>
        <branch_length>0.63821643</branch_length>
      </clade>
      <clade>
        <name>03_Salpingoeca_punica|comp16816_c2_seq2_1_1.5e-238</name>
        <branch_length>0.351381601</branch_length>
      </clade>
      <clade>
        <name>03_Salpingoeca_punica|comp16816_c2_seq1_3_1.3e-169</name>
        <branch_length>0.442795029</branch_length>
      </clade>
      <clade>
        <name>55_Emiliania_huxleyi|442092_3_2.3e-253</name>
        <branch_length>0.628198312</branch_length>
      </clade>
      <clade>
        <name>53_Chondrus_crispus|546324894_2_1.3e-224</name>
        <branch_length>0.844071724</branch_length>
      </clade>
      <clade>
        <branch_length>0.625778881</branch_length>
        <confidence type="unknown">99</confidence>
        <clade>
          <name>47_Homolaphlyctis_polyrhiza|hpol14352_3_3.8e-129</name>
          <branch_length>0.24479012</branch_length>
        </clade>
        <clade>
          <name>44_Coprinopsis_cinerea|CC1G_12348T0_3_2.2e-214</name>
          <branch_length>0.188696868</branch_length>
        </clade>
      </clade>
      <clade>
        <branch_length>0.56528185</branch_length>
        <confidence type="unknown">60</confidence>
        <clade>
          <name>43_Capsaspora_owczarzaki|CAOG_01380T0_3_1.5e-239</name>
          <branch_length>0.154038554</branch_length>
        </clade>
        <clade>
          <branch_length>0.049555681</branch_length>
          <confidence type="unknown">68</confidence>
          <clade>
            <branch_length>0.035657912</branch_length>
            <confidence type="unknown">82</confidence>
            <clade>
              <name>11_Choanoeca_perplexa|comp11330_c0_seq1_3_8.1e-148</name>
              <branch_length>0.163229788</branch_length>
            </clade>
            <clade>
              <branch_length>0.035420001</branch_length>
              <confidence type="unknown">56</confidence>
              <clade>
                <branch_length>0.191847979</branch_length>
                <confidence type="unknown">100</confidence>
                <clade>
                  <name>07_Stephanoeca_diplocostata_AU|comp22307_c2_seq1_3_3.6e-193</name>
                  <branch_length>0.007539833</branch_length>
                </clade>
                <clade>
                  <name>07_Stephanoeca_diplocostata_FR|comp22332_c0_seq1_3_7.2e-193</name>
                  <branch_length>0.005650175</branch_length>
                </clade>
              </clade>
              <clade>
                <name>05_Hartaetosiga_gracilis|comp11217_c0_seq1_1_8.9e-227</name>
                <branch_length>0.16395915</branch_length>
              </clade>
            </clade>
          </clade>
          <clade>
            <branch_length>0.024814585</branch_length>
            <confidence type="unknown">62</confidence>
            <clade>
              <name>17_Codosiga_hollandica|comp54829_c0_seq1_2_5.4e-232</name>
              <branch_length>0.166631728</branch_length>
            </clade>
            <clade>
              <branch_length>0.034603197</branch_length>
              <confidence type="unknown">97</confidence>
              <clade>
                <name>18_Salpingoeca_helianthica|comp9135_c2_seq1_2_1.4e-186</name>
                <branch_length>0.086090207</branch_length>
              </clade>
              <clade>
                <name>19_Mylnosiga_fluctuans|comp2317_c1_seq1_2_9.6e-192</name>
                <branch_length>0.054264376</branch_length>
              </clade>
            </clade>
          </clade>
        </clade>
        <clade>
          <name>35_Caenorhabditis_elegans|C15_2_2e-210</name>
          <branch_length>0.271019373</branch_length>
        </clade>
        <clade>
          <name>25_Mnemiopsis_leidyi|ML035921_2_2.8e-215</name>
          <branch_length>0.322482988</branch_length>
        </clade>
        <clade>
          <branch_length>0.218524745</branch_length>
          <confidence type="unknown">56</confidence>
          <clade>
            <branch_length>0.109307949</branch_length>
            <confidence type="unknown">75</confidence>
            <clade>
              <name>39_Tetranychus_urticae|tetur08g01320_2_3.4e-167</name>
              <branch_length>0.161915719</branch_length>
            </clade>
            <clade>
              <name>26_Hydra_vulgaris|Hma2.216958_2_5.4e-137</name>
              <branch_length>0.209404119</branch_length>
            </clade>
          </clade>
          <clade>
            <name>22_Oscarella_pearsei|comp41070_c0_seq1_3_7.5e-182</name>
            <branch_length>0.205737752</branch_length>
          </clade>
        </clade>
        <clade>
          <name>24_Amphimedon_queenslandica|Aqu1.222587_3_1.3e-180</name>
          <branch_length>0.407358166</branch_length>
        </clade>
        <clade>
          <name>23_Ephydatia_muelleri|comp60913_c0_seq1_2_1.5e-196</name>
          <branch_length>0.397420793</branch_length>
        </clade>
      </clade>
      <clade>
        <branch_length>0.83604466</branch_length>
        <confidence type="unknown">100</confidence>
        <clade>
          <name>59_Thalassiosira_pseudonana|269240_3_2.2e-175</name>
          <branch_length>0.429490881</branch_length>
        </clade>
        <clade>
          <branch_length>0.1019576</branch_length>
          <confidence type="unknown">84</confidence>
          <clade>
            <name>13_Microstomoeca_roanoka|comp6836_c0_seq1_3_1.7e-203</name>
            <branch_length>0.291331343</branch_length>
          </clade>
          <clade>
            <name>53_Chondrus_crispus|546302504_3_2.2e-214</name>
            <branch_length>0.209370346</branch_length>
          </clade>
        </clade>
        <clade>
          <name>50_Acanthamoeba_castellanii|ACA1_060350_3_3.1e-223</name>
          <branch_length>0.280782189</branch_length>
        </clade>
        <clade>
          <branch_length>0.109481768</branch_length>
          <confidence type="unknown">60</confidence>
          <clade>
            <branch_length>0.08682212</branch_length>
            <confidence type="unknown">69</confidence>
            <clade>
              <branch_length>0.058856984</branch_length>
              <confidence type="unknown">99</confidence>
              <clade>
                <name>11_Choanoeca_perplexa|comp14589_c1_seq1_2_4.4e-218</name>
                <branch_length>0.188655703</branch_length>
              </clade>
              <clade>
                <name>20_Monosiga_brevicollis|12699_3_0</name>
                <branch_length>0.117968082</branch_length>
              </clade>
            </clade>
            <clade>
              <branch_length>0.069941967</branch_length>
              <confidence type="unknown">72</confidence>
              <clade>
                <name>13_Microstomoeca_roanoka|comp17547_c0_seq1_2_4.2e-223</name>
                <branch_length>0.128412605</branch_length>
              </clade>
              <clade>
                <name>15_Hartaetosiga_balthica|comp2311_c0_seq1_3_2e-200</name>
                <branch_length>0.280533032</branch_length>
              </clade>
            </clade>
          </clade>
          <clade>
            <name>17_Codosiga_hollandica|comp30665_c0_seq1_3_2.5e-193</name>
            <branch_length>0.298732467</branch_length>
          </clade>
          <clade>
            <branch_length>0.099519443</branch_length>
            <confidence type="unknown">78</confidence>
            <clade>
              <name>06_Salpingoeca_macrocollata|comp17756_c0_seq1_2_1e-205</name>
              <branch_length>0.228439426</branch_length>
            </clade>
            <clade>
              <name>18_Salpingoeca_helianthica|comp9305_c0_seq1_3_7.5e-166</name>
              <branch_length>0.121873402</branch_length>
            </clade>
          </clade>
          <clade>
            <name>19_Mylnosiga_fluctuans|comp13344_c0_seq1_3_2.6e-167</name>
            <branch_length>0.73838552</branch_length>
          </clade>
          <clade>
            <branch_length>0.13655396</branch_length>
            <confidence type="unknown">81</confidence>
            <clade>
              <name>14_Savillea_parva|comp6272_c0_seq1_2_3.1e-171</name>
              <branch_length>0.219840726</branch_length>
            </clade>
            <clade>
              <name>01_Diaphanoeca_grandis|comp32369_c2_seq1_3_1.6e-186</name>
              <branch_length>0.3613239</branch_length>
            </clade>
          </clade>
          <clade>
            <branch_length>0.153718225</branch_length>
            <confidence type="unknown">100</confidence>
            <clade>
              <branch_length>0.083681474</branch_length>
              <confidence type="unknown">80</confidence>
              <clade>
                <name>23_Ephydatia_muelleri|comp58625_c0_seq2_3_2.8e-180</name>
                <branch_length>0.25366475</branch_length>
              </clade>
              <clade>
                <branch_length>0.088986332</branch_length>
                <confidence type="unknown">83</confidence>
                <clade>
                  <branch_length>0.077090794</branch_length>
                  <confidence type="unknown">88</confidence>
                  <clade>
                    <name>39_Tetranychus_urticae|tetur01g07690_3_5.8e-130</name>
                    <branch_length>0.195255142</branch_length>
                  </clade>
                  <clade>
                    <name>26_Hydra_vulgaris|Hma2.210459_3_5.9e-133</name>
                    <branch_length>0.242265599</branch_length>
                  </clade>
                </clade>
                <clade>
                  <name>30_Ciona_intestinalis|ENSCINT00000031556_3_1.5e-155</name>
                  <branch_length>0.256042409</branch_length>
                </clade>
              </clade>
            </clade>
            <clade>
              <branch_length>0.051216284</branch_length>
              <confidence type="unknown">63</confidence>
              <clade>
                <name>35_Caenorhabditis_elegans|C37_3_1.3e-191</name>
                <branch_length>0.243530562</branch_length>
              </clade>
              <clade>
                <name>25_Mnemiopsis_leidyi|ML13028_3_6e-180</name>
                <branch_length>0.30349954</branch_length>
              </clade>
            </clade>
          </clade>
          <clade>
            <name>47_Homolaphlyctis_polyrhiza|hpol932_2_5.9e-238</name>
            <branch_length>0.260260243</branch_length>
          </clade>
        </clade>
      </clade>
      <clade>
        <branch_length>0.970987764</branch_length>
        <confidence type="unknown">100</confidence>
        <clade>
          <name>03_Salpingoeca_punica|comp16228_c0_seq1_2_1.6e-171</name>
          <branch_length>0.262730527</branch_length>
        </clade>
        <clade>
          <name>06_Salpingoeca_macrocollata|comp18465_c0_seq3_3_2.8e-148</name>
          <branch_length>0.413638692</branch_length>
        </clade>
      </clade>
      <clade>
        <branch_length>0.580917762</branch_length>
        <confidence type="unknown">91</confidence>
        <clade>
          <name>59_Thalassiosira_pseudonana|27656_2_4.1e-199</name>
          <branch_length>0.251274922</branch_length>
        </clade>
        <clade>
          <name>58_Bigelowiella_natans|88281_1_2.3e-214</name>
          <branch_length>0.23619855</branch_length>
        </clade>
      </clade>
      <clade>
        <branch_length>0.665036822</branch_length>
        <confidence type="unknown">100</confidence>
        <clade>
          <name>52_Chlamydomonas_reinhardtii|Cre02.g080600.t1.2_3_9.8e-250</name>
          <branch_length>0.039111917</branch_length>
        </clade>
        <clade>
          <name>52_Chlamydomonas_reinhardtii|g1475.t1_2_1.3e-259</name>
          <branch_length>0.018403539</branch_length>
        </clade>
      </clade>
      <clade>
        <branch_length>0.302664195</branch_length>
        <confidence type="unknown">86</confidence>
        <clade>
          <branch_length>0.038503873</branch_length>
          <confidence type="unknown">55</confidence>
          <clade>
            <name>11_Choanoeca_perplexa|comp12883_c0_seq1_1_0</name>
            <branch_length>0.134322351</branch_length>
          </clade>
          <clade>
            <branch_length>0.050178251</branch_length>
            <confidence type="unknown">100</confidence>
            <clade>
              <name>20_Monosiga_brevicollis|31085_2_0</name>
              <branch_length>0.025719165</branch_length>
            </clade>
            <clade>
              <name>20_Monosiga_brevicollis|35238_1_0</name>
              <branch_length>0.013553026</branch_length>
            </clade>
          </clade>
        </clade>
        <clade>
          <branch_length>0.03645711</branch_length>
          <confidence type="unknown">51</confidence>
          <clade>
            <name>13_Microstomoeca_roanoka|comp16714_c3_seq1_1_0</name>
            <branch_length>0.086132382</branch_length>
          </clade>
          <clade>
            <branch_length>0.056078288</branch_length>
            <confidence type="unknown">100</confidence>
            <clade>
              <name>21_Salpingoeca_rosetta|PTSG_03754T0_3_1.6e-301</name>
              <branch_length>0.002679439</branch_length>
            </clade>
            <clade>
              <branch_length>0.005305873</branch_length>
              <confidence type="unknown">97</confidence>
              <clade>
                <name>21_Salpingoeca_rosetta|PTSG_01374T0_2_0</name>
                <branch_length>0.012334881</branch_length>
              </clade>
              <clade>
                <name>21_Salpingoeca_rosetta|PTSG_10966T0_1_0</name>
                <branch_length>0.005089011</branch_length>
              </clade>
            </clade>
          </clade>
        </clade>
        <clade>
          <branch_length>0.065418196</branch_length>
          <confidence type="unknown">72</confidence>
          <clade>
            <branch_length>0.295463686</branch_length>
            <confidence type="unknown">100</confidence>
            <clade>
              <name>12_Salpingoeca_infusionum|comp15992_c3_seq1_2_2.7e-274</name>
              <branch_length>0.015959026</branch_length>
            </clade>
            <clade>
              <name>12_Salpingoeca_infusionum|comp15992_c3_seq2_3_3.7e-274</name>
              <branch_length>0.00386659</branch_length>
            </clade>
          </clade>
          <clade>
            <name>15_Hartaetosiga_balthica|comp9438_c2_seq1_1_4.7e-296</name>
            <branch_length>0.142089095</branch_length>
          </clade>
          <clade>
            <branch_length>0.316173916</branch_length>
            <confidence type="unknown">100</confidence>
            <clade>
              <name>15_Hartaetosiga_balthica|comp6883_c0_seq1_2_2.3e-235</name>
              <branch_length>0.224927564</branch_length>
            </clade>
            <clade>
              <branch_length>0.238026321</branch_length>
              <confidence type="unknown">100</confidence>
              <clade>
                <name>05_Hartaetosiga_gracilis|comp13062_c2_seq4_2_1.1e-218</name>
                <branch_length>1.747E-6</branch_length>
              </clade>
              <clade>
                <name>05_Hartaetosiga_gracilis|comp13062_c2_seq2_3_1.3e-218</name>
                <branch_length>1.747E-6</branch_length>
              </clade>
            </clade>
          </clade>
        </clade>
        <clade>
          <name>12_Salpingoeca_infusionum|comp11421_c0_seq1_1_0</name>
          <branch_length>0.094562103</branch_length>
        </clade>
      </clade>
      <clade>
        <branch_length>0.333863544</branch_length>
        <confidence type="unknown">86</confidence>
        <clade>
          <branch_length>0.086485737</branch_length>
          <confidence type="unknown">100</confidence>
          <clade>
            <branch_length>0.081756772</branch_length>
            <confidence type="unknown">100</confidence>
            <clade>
              <name>04_Salpingoeca_urceolata|comp17673_c0_seq1_3_4.8e-272</name>
              <branch_length>0.011487956</branch_length>
            </clade>
            <clade>
              <name>04_Salpingoeca_urceolata|comp17673_c0_seq4_2_3.2e-272</name>
              <branch_length>1.747E-6</branch_length>
            </clade>
          </clade>
          <clade>
            <name>04_Salpingoeca_urceolata|comp17673_c0_seq6_1_1.3e-298</name>
            <branch_length>0.008638862</branch_length>
          </clade>
        </clade>
        <clade>
          <branch_length>0.018983883</branch_length>
          <confidence type="unknown">52</confidence>
          <clade>
            <branch_length>0.065700623</branch_length>
            <confidence type="unknown">100</confidence>
            <clade>
              <branch_length>0.018115202</branch_length>
              <confidence type="unknown">100</confidence>
              <clade>
                <name>09_Salpingoeca_kvevrii|comp11028_c1_seq12_2_0</name>
                <branch_length>1.747E-6</branch_length>
              </clade>
              <clade>
                <name>09_Salpingoeca_kvevrii|comp11028_c1_seq14_1_0</name>
                <branch_length>0.088367423</branch_length>
              </clade>
            </clade>
            <clade>
              <name>09_Salpingoeca_kvevrii|comp11028_c1_seq11_3_0</name>
              <branch_length>0.006433341</branch_length>
            </clade>
          </clade>
          <clade>
            <branch_length>0.053217677</branch_length>
            <confidence type="unknown">99</confidence>
            <clade>
              <branch_length>0.2821035</branch_length>
              <confidence type="unknown">100</confidence>
              <clade>
                <name>07_Stephanoeca_diplocostata_AU|comp18815_c0_seq1_2_4e-248</name>
                <branch_length>8.54619E-4</branch_length>
              </clade>
              <clade>
                <name>07_Stephanoeca_diplocostata_FR|comp19502_c0_seq1_2_2.3e-248</name>
                <branch_length>0.001687774</branch_length>
              </clade>
            </clade>
            <clade>
              <name>06_Salpingoeca_macrocollata|comp14111_c0_seq1_1_0</name>
              <branch_length>0.08623652</branch_length>
            </clade>
          </clade>
        </clade>
      </clade>
      <clade>
        <branch_length>0.32766444</branch_length>
        <confidence type="unknown">52</confidence>
        <clade>
          <branch_length>0.06591034</branch_length>
          <confidence type="unknown">71</confidence>
          <clade>
            <branch_length>0.149342016</branch_length>
            <confidence type="unknown">100</confidence>
            <clade>
              <name>07_Stephanoeca_diplocostata_FR|comp18193_c0_seq1_1_1.4e-275</name>
              <branch_length>1.747E-6</branch_length>
            </clade>
            <clade>
              <name>07_Stephanoeca_diplocostata_AU|comp17483_c0_seq1_1_1.3e-275</name>
              <branch_length>1.747E-6</branch_length>
            </clade>
          </clade>
          <clade>
            <name>01_Diaphanoeca_grandis|comp25564_c0_seq1_1_5.7e-268</name>
            <branch_length>0.176289266</branch_length>
          </clade>
        </clade>
        <clade>
          <branch_length>0.021399527</branch_length>
          <confidence type="unknown">88</confidence>
          <clade>
            <branch_length>0.028108927</branch_length>
            <confidence type="unknown">97</confidence>
            <clade>
              <name>02_Acanthoeca_spectabilis|comp16977_c0_seq1_1_2.7e-292</name>
              <branch_length>0.073614285</branch_length>
            </clade>
            <clade>
              <name>14_Savillea_parva|comp11748_c0_seq1_1_5.2e-297</name>
              <branch_length>0.073149182</branch_length>
            </clade>
          </clade>
          <clade>
            <branch_length>0.043331558</branch_length>
            <confidence type="unknown">100</confidence>
            <clade>
              <name>08_Helgoeca_nana|comp27130_c3_seq9_1_9.3e-285</name>
              <branch_length>0.049116452</branch_length>
            </clade>
            <clade>
              <branch_length>0.077959583</branch_length>
              <confidence type="unknown">100</confidence>
              <clade>
                <name>02_Acanthoeca_spectabilis|comp16565_c0_seq2_2_4e-265</name>
                <branch_length>0.158981368</branch_length>
              </clade>
              <clade>
                <branch_length>0.026898143</branch_length>
                <confidence type="unknown">62</confidence>
                <clade>
                  <name>02_Acanthoeca_spectabilis|comp13262_c0_seq1_3_2.9e-233</name>
                  <branch_length>0.242514789</branch_length>
                </clade>
                <clade>
                  <branch_length>0.052893649</branch_length>
                  <confidence type="unknown">100</confidence>
                  <clade>
                    <name>08_Helgoeca_nana|comp27130_c3_seq1_3_1.8e-254</name>
                    <branch_length>0.029466128</branch_length>
                  </clade>
                  <clade>
                    <name>08_Helgoeca_nana|comp27130_c3_seq4_2_3.3e-267</name>
                    <branch_length>0.0655725</branch_length>
                  </clade>
                </clade>
              </clade>
            </clade>
          </clade>
        </clade>
      </clade>
      <clade>
        <branch_length>0.240819077</branch_length>
        <confidence type="unknown">100</confidence>
        <clade>
          <name>10_Didymoeca_costata|comp16674_c0_seq1_2_9.6e-240</name>
          <branch_length>0.126098335</branch_length>
        </clade>
        <clade>
          <name>10_Didymoeca_costata|comp16248_c0_seq2_1_3.1e-245</name>
          <branch_length>0.19661457</branch_length>
        </clade>
      </clade>
      <clade>
        <branch_length>0.300889886</branch_length>
        <confidence type="unknown">100</confidence>
        <clade>
          <branch_length>0.001794054</branch_length>
          <confidence type="unknown">100</confidence>
          <clade>
            <name>34_Strongylocentrotus_purpuratus|390341629_3_7.7e-261</name>
            <branch_length>1.747E-6</branch_length>
          </clade>
          <clade>
            <name>34_Strongylocentrotus_purpuratus|390341628_2_1.8e-261</name>
            <branch_length>1.747E-6</branch_length>
          </clade>
        </clade>
        <clade>
          <name>34_Strongylocentrotus_purpuratus|390341631_1_1.8e-261</name>
          <branch_length>0.001018839</branch_length>
        </clade>
      </clade>
      <clade>
        <name>25_Mnemiopsis_leidyi|ML18558_1_2.1e-253</name>
        <branch_length>0.339000839</branch_length>
      </clade>
      <clade>
        <name>27_Nematostella_vectensis|189485_2_1.3e-241</name>
        <branch_length>0.274248469</branch_length>
      </clade>
      <clade>
        <branch_length>0.140004831</branch_length>
        <confidence type="unknown">60</confidence>
        <clade>
          <name>28_Acropora_digitifera|04788_2_2.4e-205</name>
          <branch_length>0.260912533</branch_length>
        </clade>
        <clade>
          <name>27_Nematostella_vectensis|195315_1_3.4e-258</name>
          <branch_length>0.174304287</branch_length>
        </clade>
      </clade>
      <clade>
        <branch_length>0.137126094</branch_length>
        <confidence type="unknown">100</confidence>
        <clade>
          <branch_length>0.060479005</branch_length>
          <confidence type="unknown">100</confidence>
          <clade>
            <name>37_Daphnia_pulex|256736_2_4.3e-259</name>
            <branch_length>0.076125177</branch_length>
          </clade>
          <clade>
            <name>37_Daphnia_pulex|227800_3_1.9e-234</name>
            <branch_length>0.101919618</branch_length>
          </clade>
        </clade>
        <clade>
          <name>37_Daphnia_pulex|302856_1_1.1e-268</name>
          <branch_length>0.166597863</branch_length>
        </clade>
      </clade>
      <clade>
        <branch_length>0.113250114</branch_length>
        <confidence type="unknown">66</confidence>
        <clade>
          <name>42_Helobdella_robusta|192798_3_1.4e-201</name>
          <branch_length>0.34386418</branch_length>
        </clade>
        <clade>
          <branch_length>0.048110821</branch_length>
          <confidence type="unknown">83</confidence>
          <clade>
            <name>42_Helobdella_robusta|186840_2_1.2e-225</name>
            <branch_length>0.14470861</branch_length>
          </clade>
          <clade>
            <name>42_Helobdella_robusta|186139_1_8.5e-232</name>
            <branch_length>0.122992773</branch_length>
          </clade>
        </clade>
      </clade>
      <clade>
        <name>30_Ciona_intestinalis|ENSCINT00000019652_1_3.5e-221</name>
        <branch_length>0.27360091</branch_length>
      </clade>
      <clade>
        <branch_length>0.200060231</branch_length>
        <confidence type="unknown">92</confidence>
        <clade>
          <branch_length>0.271906179</branch_length>
          <confidence type="unknown">100</confidence>
          <clade>
            <name>29_Trichoplax_adhaerens|50470_3_3.5e-199</name>
            <branch_length>1.747E-6</branch_length>
          </clade>
          <clade>
            <name>29_Trichoplax_adhaerens|50471_2_8.1e-200</name>
            <branch_length>9.92374E-4</branch_length>
          </clade>
        </clade>
        <clade>
          <name>29_Trichoplax_adhaerens|38294_1_1.5e-216</name>
          <branch_length>0.160892739</branch_length>
        </clade>
      </clade>
      <clade>
        <name>26_Hydra_vulgaris|Hma2.225025_1_1.7e-194</name>
        <branch_length>0.412540567</branch_length>
      </clade>
      <clade>
        <name>39_Tetranychus_urticae|tetur11g01700_1_5.3e-208</name>
        <branch_length>0.366363748</branch_length>
      </clade>
      <clade>
        <branch_length>0.255330666</branch_length>
        <confidence type="unknown">50</confidence>
        <clade>
          <branch_length>0.101586139</branch_length>
          <confidence type="unknown">100</confidence>
          <clade>
            <name>49_Dictyostelium_discoideum|DDB0191168_3_7.8e-170</name>
            <branch_length>0.106393106</branch_length>
          </clade>
          <clade>
            <branch_length>0.126473561</branch_length>
            <confidence type="unknown">100</confidence>
            <clade>
              <name>49_Dictyostelium_discoideum|DDB0238264_2_7.4e-205</name>
              <branch_length>1.747E-6</branch_length>
            </clade>
            <clade>
              <name>49_Dictyostelium_discoideum|DDB0185047_1_7.4e-205</name>
              <branch_length>1.747E-6</branch_length>
            </clade>
          </clade>
        </clade>
        <clade>
          <branch_length>0.08028981</branch_length>
          <confidence type="unknown">50</confidence>
          <clade>
            <branch_length>0.140936641</branch_length>
            <confidence type="unknown">100</confidence>
            <clade>
              <branch_length>0.147653597</branch_length>
              <confidence type="unknown">100</confidence>
              <clade>
                <name>54_Naegleria_gruberi|73252_3_1.1e-159</name>
                <branch_length>0.007906454</branch_length>
              </clade>
              <clade>
                <name>54_Naegleria_gruberi|73187_2_1.8e-161</name>
                <branch_length>0.003346988</branch_length>
              </clade>
            </clade>
            <clade>
              <name>54_Naegleria_gruberi|56405_1_1.1e-182</name>
              <branch_length>0.06555463</branch_length>
            </clade>
          </clade>
          <clade>
            <branch_length>0.057027469</branch_length>
            <confidence type="unknown">58</confidence>
            <clade>
              <name>57_Tetrahymena_thermophila|14_2_1.6e-159</name>
              <branch_length>0.364956075</branch_length>
            </clade>
            <clade>
              <branch_length>0.153483042</branch_length>
              <confidence type="unknown">100</confidence>
              <clade>
                <name>57_Tetrahymena_thermophila|7_1_1.6e-189</name>
                <branch_length>0.116380321</branch_length>
              </clade>
              <clade>
                <name>57_Tetrahymena_thermophila|3699_3_3e-146</name>
                <branch_length>0.220034881</branch_length>
              </clade>
            </clade>
          </clade>
        </clade>
      </clade>
    </clade>
    <clade>
      <name>22_Oscarella_pearsei|comp8889_c0_seq1_1_3.8e-230</name>
      <branch_length>0.209742023</branch_length>
    </clade>
  </clade>
</phylogeny>
<phylogeny rooted="false" rerootable="true">
  <name>HSP90</name>
  <clade>
    <clade>
      <name>24_Amphimedon_queenslandica|Aqu1.214058_3_0.0009</name>
      <branch_length>3.183864486</branch_length>
    </clade>
    <clade>
      <name>46_Schizosaccharomyces_pombe|SPAC22F3.15.1_3_0.049</name>
      <branch_length>2.388036567</branch_length>
    </clade>
    <clade>
      <name>30_Ciona_intestinalis|ENSCINT00000023662_1_4.4e-201</name>
      <branch_length>0.798284043</branch_length>
    </clade>
    <clade>
      <branch_length>0.665774248</branch_length>
      <confidence type="unknown">53</confidence>
      <clade>
        <name>40_Lottia_gigantea|161608_1_4.1e-185</name>
        <branch_length>0.20055338</branch_length>
      </clade>
      <clade>
        <name>39_Tetranychus_urticae|tetur07g03840_1_7.6e-183</name>
        <branch_length>0.246556782</branch_length>
      </clade>
      <clade>
        <branch_length>0.113271613</branch_length>
        <confidence type="unknown">72</confidence>
        <clade>
          <name>29_Trichoplax_adhaerens|57068_1_9e-181</name>
          <branch_length>0.208491687</branch_length>
        </clade>
        <clade>
          <branch_length>0.280739349</branch_length>
          <confidence type="unknown">99</confidence>
          <clade>
            <name>26_Hydra_vulgaris|Hma2.226194_1_4.4e-162</name>
            <branch_length>1.95E-6</branch_length>
          </clade>
          <clade>
            <name>26_Hydra_vulgaris|Hma2.217134_3_1.9e-52</name>
            <branch_length>0.289610689</branch_length>
          </clade>
        </clade>
      </clade>
    </clade>
    <clade>
      <name>42_Helobdella_robusta|158018_1_8.3e-199</name>
      <branch_length>0.870886621</branch_length>
    </clade>
    <clade>
      <branch_length>0.907131322</branch_length>
      <confidence type="unknown">100</confidence>
      <clade>
        <name>34_Strongylocentrotus_purpuratus|390340697_1_3.5e-220</name>
        <branch_length>1.95E-6</branch_length>
      </clade>
      <clade>
        <name>34_Strongylocentrotus_purpuratus|390341170_2_1.1e-126</name>
        <branch_length>0.014415175</branch_length>
      </clade>
    </clade>
    <clade>
      <branch_length>0.853692227</branch_length>
      <confidence type="unknown">76</confidence>
      <clade>
        <name>24_Amphimedon_queenslandica|Aqu1.224546_1_1.3e-213</name>
        <branch_length>0.211387102</branch_length>
      </clade>
      <clade>
        <branch_length>0.147415369</branch_length>
        <confidence type="unknown">100</confidence>
        <clade>
          <name>23_Ephydatia_muelleri|comp68913_c0_seq1_1_2.4e-223</name>
          <branch_length>1.95E-6</branch_length>
        </clade>
        <clade>
          <name>23_Ephydatia_muelleri|comp380139_c0_seq1_3_1.6e-52</name>
          <branch_length>1.95E-6</branch_length>
        </clade>
      </clade>
    </clade>
    <clade>
      <branch_length>0.877020568</branch_length>
      <confidence type="unknown">100</confidence>
      <clade>
        <name>28_Acropora_digitifera|19907_1_5.8e-209</name>
        <branch_length>0.181312778</branch_length>
      </clade>
      <clade>
        <name>27_Nematostella_vectensis|178640_1_6.4e-211</name>
        <branch_length>0.145404411</branch_length>
      </clade>
    </clade>
    <clade>
      <branch_length>0.883584486</branch_length>
      <confidence type="unknown">91</confidence>
      <clade>
        <branch_length>0.125368368</branch_length>
        <confidence type="unknown">100</confidence>
        <clade>
          <name>38_Drosophila_melanogaster|FBtr0332873_1_1.1e-235</name>
          <branch_length>1.95E-6</branch_length>
        </clade>
        <clade>
          <name>38_Drosophila_melanogaster|FBtr0073040_2_3.6e-235</name>
          <branch_length>1.95E-6</branch_length>
        </clade>
      </clade>
      <clade>
        <branch_length>0.144034244</branch_length>
        <confidence type="unknown">99</confidence>
        <clade>
          <name>37_Daphnia_pulex|302452_1_5.7e-228</name>
          <branch_length>0.016091262</branch_length>
        </clade>
        <clade>
          <branch_length>0.018805264</branch_length>
          <confidence type="unknown">99</confidence>
          <clade>
            <name>37_Daphnia_pulex|96705_2_4.3e-178</name>
            <branch_length>0.036453769</branch_length>
          </clade>
          <clade>
            <name>37_Daphnia_pulex|249349_3_1.2e-167</name>
            <branch_length>0.175774192</branch_length>
          </clade>
        </clade>
      </clade>
    </clade>
    <clade>
      <branch_length>0.99880297</branch_length>
      <confidence type="unknown">96</confidence>
      <clade>
        <name>16_Salpingoeca_dolichothecata|comp7139_c1_seq1_3_5.3e-27</name>
        <branch_length>0.087350779</branch_length>
      </clade>
      <clade>
        <name>16_Salpingoeca_dolichothecata|comp23072_c0_seq1_1_3e-242</name>
        <branch_length>0.098537835</branch_length>
      </clade>
    </clade>
    <clade>
      <name>25_Mnemiopsis_leidyi|ML04011_1_2.2e-203</name>
      <branch_length>1.129419758</branch_length>
    </clade>
    <clade>
      <branch_length>0.992335601</branch_length>
      <confidence type="unknown">99</confidence>
      <clade>
        <name>36_Pristionchus_pacificus|PPA18081_1_1.2e-258</name>
        <branch_length>0.07589822</branch_length>
      </clade>
      <clade>
        <name>35_Caenorhabditis_elegans|C47_1_5.2e-240</name>
        <branch_length>0.155526082</branch_length>
      </clade>
    </clade>
    <clade>
      <name>43_Capsaspora_owczarzaki|CAOG_03574T0_1_3.8e-247</name>
      <branch_length>1.104969612</branch_length>
    </clade>
    <clade>
      <branch_length>1.20644947</branch_length>
      <confidence type="unknown">100</confidence>
      <clade>
        <name>47_Homolaphlyctis_polyrhiza|hpol24007_2_6e-185</name>
        <branch_length>0.001645509</branch_length>
      </clade>
      <clade>
        <name>47_Homolaphlyctis_polyrhiza|hpol5988_1_1.7e-186</name>
        <branch_length>1.95E-6</branch_length>
      </clade>
    </clade>
    <clade>
      <name>44_Coprinopsis_cinerea|CC1G_03927T0_1_2.4e-213</name>
      <branch_length>1.176576786</branch_length>
    </clade>
    <clade>
      <name>48_Yarrowia_lipolytica|YALI0C07953g_1_1.5e-176</name>
      <branch_length>1.302733111</branch_length>
    </clade>
    <clade>
      <name>46_Schizosaccharomyces_pombe|SPAC926.04c.1_1_1.7e-157</name>
      <branch_length>1.442490755</branch_length>
    </clade>
    <clade>
      <branch_length>1.317952558</branch_length>
      <confidence type="unknown">99</confidence>
      <clade>
        <branch_length>0.034412516</branch_length>
        <confidence type="unknown">100</confidence>
        <clade>
          <name>45_Rhizopus_oryzae|RO3G_11230T0_2_5.5e-188</name>
          <branch_length>0.013427506</branch_length>
        </clade>
        <clade>
          <name>45_Rhizopus_oryzae|RO3G_13636T0_1_1.1e-189</name>
          <branch_length>0.006976098</branch_length>
        </clade>
      </clade>
      <clade>
        <name>45_Rhizopus_oryzae|RO3G_00121T0_3_1.7e-163</name>
        <branch_length>0.115631925</branch_length>
      </clade>
    </clade>
    <clade>
      <name>57_Tetrahymena_thermophila|3829_1_2.5e-177</name>
      <branch_length>1.576627515</branch_length>
    </clade>
    <clade>
      <branch_length>1.462000732</branch_length>
      <confidence type="unknown">85</confidence>
      <clade>
        <branch_length>0.132814757</branch_length>
        <confidence type="unknown">98</confidence>
        <clade>
          <name>54_Naegleria_gruberi|52089_2_1.5e-142</name>
          <branch_length>0.116978147</branch_length>
        </clade>
        <clade>
          <name>54_Naegleria_gruberi|29544_1_1.1e-155</name>
          <branch_length>0.05554294</branch_length>
        </clade>
      </clade>
      <clade>
        <name>49_Dictyostelium_discoideum|DDB0191163_1_6.1e-147</name>
        <branch_length>0.294864664</branch_length>
      </clade>
    </clade>
    <clade>
      <name>53_Chondrus_crispus|546312950_1_2.4e-202</name>
      <branch_length>1.277202699</branch_length>
    </clade>
    <clade>
      <branch_length>1.08881943</branch_length>
      <confidence type="unknown">91</confidence>
      <clade>
        <name>52_Chlamydomonas_reinhardtii|Cre09.g386750.t1.2_1_3.2e-208</name>
        <branch_length>0.131378053</branch_length>
      </clade>
      <clade>
        <branch_length>0.023136446</branch_length>
        <confidence type="unknown">67</confidence>
        <clade>
          <branch_length>0.140633328</branch_length>
          <confidence type="unknown">100</confidence>
          <clade>
            <name>50_Acanthamoeba_castellanii|ACA1_210080_1_1.2e-203</name>
            <branch_length>4.1575E-5</branch_length>
          </clade>
          <clade>
            <name>50_Acanthamoeba_castellanii|ACA1_209830_2_5.8e-178</name>
            <branch_length>0.00426642</branch_length>
          </clade>
        </clade>
        <clade>
          <branch_length>0.094049557</branch_length>
          <confidence type="unknown">99</confidence>
          <clade>
            <name>55_Emiliania_huxleyi|443778_3_1.4e-222</name>
            <branch_length>0.010447596</branch_length>
          </clade>
          <clade>
            <branch_length>0.010191355</branch_length>
            <confidence type="unknown">99</confidence>
            <clade>
              <name>55_Emiliania_huxleyi|437342_2_1.6e-224</name>
              <branch_length>1.95E-6</branch_length>
            </clade>
            <clade>
              <name>55_Emiliania_huxleyi|439906_1_1.2e-224</name>
              <branch_length>5.30114E-4</branch_length>
            </clade>
          </clade>
        </clade>
      </clade>
    </clade>
    <clade>
      <branch_length>1.119766951</branch_length>
      <confidence type="unknown">56</confidence>
      <clade>
        <branch_length>0.211011545</branch_length>
        <confidence type="unknown">100</confidence>
        <clade>
          <name>51_Arabidopsis_thaliana|AT5G56010.1_3_3.7e-196</name>
          <branch_length>0.02498643</branch_length>
        </clade>
        <clade>
          <branch_length>0.023014744</branch_length>
          <confidence type="unknown">100</confidence>
          <clade>
            <name>51_Arabidopsis_thaliana|AT5G56030.2_2_4.5e-198</name>
            <branch_length>1.95E-6</branch_length>
          </clade>
          <clade>
            <name>51_Arabidopsis_thaliana|AT5G56030.1_1_3.4e-198</name>
            <branch_length>1.95E-6</branch_length>
          </clade>
        </clade>
      </clade>
      <clade>
        <branch_length>0.047423732</branch_length>
        <confidence type="unknown">67</confidence>
        <clade>
          <name>59_Thalassiosira_pseudonana|6285_1_2.5e-193</name>
          <branch_length>0.20017952</branch_length>
        </clade>
        <clade>
          <name>58_Bigelowiella_natans|92743_1_1.7e-170</name>
          <branch_length>0.349571052</branch_length>
        </clade>
      </clade>
    </clade>
    <clade>
      <branch_length>1.209800613</branch_length>
      <confidence type="unknown">99</confidence>
      <clade>
        <name>56_Guillardia_theta|160775_1_3.3e-217</name>
        <branch_length>0.006288293</branch_length>
      </clade>
      <clade>
        <name>56_Guillardia_theta|84117_2_8.9e-215</name>
        <branch_length>0.011278982</branch_length>
      </clade>
    </clade>
    <clade>
      <name>56_Guillardia_theta|160284_3_1.9e-144</name>
      <branch_length>1.412758765</branch_length>
    </clade>
    <clade>
      <name>48_Yarrowia_lipolytica|YALI0E13706g_2_1.1e-10</name>
      <branch_length>3.963491358</branch_length>
    </clade>
    <clade>
      <branch_length>1.29095767</branch_length>
      <confidence type="unknown">70</confidence>
      <clade>
        <branch_length>0.141463478</branch_length>
        <confidence type="unknown">90</confidence>
        <clade>
          <name>47_Homolaphlyctis_polyrhiza|hpol5594_3_1.8e-63</name>
          <branch_length>0.612088005</branch_length>
        </clade>
        <clade>
          <name>44_Coprinopsis_cinerea|CC1G_14625T0_2_1.7e-46</name>
          <branch_length>0.834739558</branch_length>
        </clade>
      </clade>
      <clade>
        <name>50_Acanthamoeba_castellanii|ACA1_060340_3_7.1e-113</name>
        <branch_length>0.332109125</branch_length>
      </clade>
    </clade>
    <clade>
      <branch_length>1.332387381</branch_length>
      <confidence type="unknown">90</confidence>
      <clade>
        <branch_length>0.022912384</branch_length>
        <confidence type="unknown">61</confidence>
        <clade>
          <name>43_Capsaspora_owczarzaki|CAOG_02358T0_2_5.2e-140</name>
          <branch_length>0.229172915</branch_length>
        </clade>
        <clade>
          <branch_length>0.043773965</branch_length>
          <confidence type="unknown">55</confidence>
          <clade>
            <branch_length>0.031702195</branch_length>
            <confidence type="unknown">83</confidence>
            <clade>
              <branch_length>0.086467325</branch_length>
              <confidence type="unknown">98</confidence>
              <clade>
                <branch_length>0.034248449</branch_length>
                <confidence type="unknown">61</confidence>
                <clade>
                  <branch_length>0.148650359</branch_length>
                  <confidence type="unknown">100</confidence>
                  <clade>
                    <name>07_Stephanoeca_diplocostata_AU|comp17408_c0_seq1_2_6.5e-129</name>
                    <branch_length>1.95E-6</branch_length>
                  </clade>
                  <clade>
                    <name>07_Stephanoeca_diplocostata_FR|comp25600_c0_seq1_2_7.5e-129</name>
                    <branch_length>1.95E-6</branch_length>
                  </clade>
                </clade>
                <clade>
                  <branch_length>0.076029717</branch_length>
                  <confidence type="unknown">89</confidence>
                  <clade>
                    <name>10_Didymoeca_costata|comp5370_c0_seq1_2_4.4e-111</name>
                    <branch_length>0.297457583</branch_length>
                  </clade>
                  <clade>
                    <branch_length>0.15295641</branch_length>
                    <confidence type="unknown">100</confidence>
                    <clade>
                      <name>01_Diaphanoeca_grandis|comp31845_c1_seq1_2_3.6e-126</name>
                      <branch_length>0.094689608</branch_length>
                    </clade>
                    <clade>
                      <name>01_Diaphanoeca_grandis|comp31845_c1_seq3_3_6.5e-126</name>
                      <branch_length>1.95E-6</branch_length>
                    </clade>
                  </clade>
                </clade>
              </clade>
              <clade>
                <branch_length>0.057364776</branch_length>
                <confidence type="unknown">100</confidence>
                <clade>
                  <name>14_Savillea_parva|comp13461_c0_seq1_2_4.3e-119</name>
                  <branch_length>0.142216864</branch_length>
                </clade>
                <clade>
                  <branch_length>0.039683467</branch_length>
                  <confidence type="unknown">90</confidence>
                  <clade>
                    <name>08_Helgoeca_nana|comp17309_c0_seq1_2_6.9e-131</name>
                    <branch_length>0.090323002</branch_length>
                  </clade>
                  <clade>
                    <name>02_Acanthoeca_spectabilis|comp17190_c0_seq1_2_6.2e-138</name>
                    <branch_length>0.107837983</branch_length>
                  </clade>
                </clade>
              </clade>
            </clade>
            <clade>
              <name>16_Salpingoeca_dolichothecata|comp13847_c0_seq1_2_5.5e-128</name>
              <branch_length>0.224354676</branch_length>
            </clade>
          </clade>
          <clade>
            <branch_length>0.023697551</branch_length>
            <confidence type="unknown">63</confidence>
            <clade>
              <name>04_Salpingoeca_urceolata|comp9433_c0_seq1_2_3.8e-141</name>
              <branch_length>0.191311666</branch_length>
            </clade>
            <clade>
              <branch_length>0.030406925</branch_length>
              <confidence type="unknown">96</confidence>
              <clade>
                <branch_length>0.03479808</branch_length>
                <confidence type="unknown">92</confidence>
                <clade>
                  <name>12_Salpingoeca_infusionum|comp16431_c0_seq1_2_5.1e-130</name>
                  <branch_length>0.17929222</branch_length>
                </clade>
                <clade>
                  <branch_length>0.042718819</branch_length>
                  <confidence type="unknown">91</confidence>
                  <clade>
                    <name>11_Choanoeca_perplexa|comp15152_c0_seq1_2_1.7e-115</name>
                    <branch_length>0.186620328</branch_length>
                  </clade>
                  <clade>
                    <name>20_Monosiga_brevicollis|21523_2_3.1e-140</name>
                    <branch_length>0.12025599</branch_length>
                  </clade>
                </clade>
              </clade>
              <clade>
                <branch_length>0.023147176</branch_length>
                <confidence type="unknown">72</confidence>
                <clade>
                  <branch_length>0.03142244</branch_length>
                  <confidence type="unknown">90</confidence>
                  <clade>
                    <name>21_Salpingoeca_rosetta|PTSG_04395T0_2_1.5e-164</name>
                    <branch_length>0.099785657</branch_length>
                  </clade>
                  <clade>
                    <branch_length>0.135889091</branch_length>
                    <confidence type="unknown">100</confidence>
                    <clade>
                      <name>13_Microstomoeca_roanoka|comp14741_c0_seq3_3_7.3e-148</name>
                      <branch_length>1.95E-6</branch_length>
                    </clade>
                    <clade>
                      <name>13_Microstomoeca_roanoka|comp14741_c0_seq1_2_5.5e-148</name>
                      <branch_length>1.95E-6</branch_length>
                    </clade>
                  </clade>
                </clade>
                <clade>
                  <branch_length>0.122714224</branch_length>
                  <confidence type="unknown">100</confidence>
                  <clade>
                    <name>05_Hartaetosiga_gracilis|comp11130_c0_seq1_2_1.1e-138</name>
                    <branch_length>0.115098803</branch_length>
                  </clade>
                  <clade>
                    <name>15_Hartaetosiga_balthica|comp8134_c2_seq1_2_3.8e-133</name>
                    <branch_length>0.127500641</branch_length>
                  </clade>
                </clade>
              </clade>
            </clade>
          </clade>
        </clade>
        <clade>
          <branch_length>0.091669866</branch_length>
          <confidence type="unknown">100</confidence>
          <clade>
            <name>18_Salpingoeca_helianthica|comp16079_c0_seq1_2_1.2e-143</name>
            <branch_length>0.10968088</branch_length>
          </clade>
          <clade>
            <name>19_Mylnosiga_fluctuans|comp10810_c0_seq1_2_3.9e-148</name>
            <branch_length>0.086385959</branch_length>
          </clade>
        </clade>
        <clade>
          <name>09_Salpingoeca_kvevrii|comp8880_c0_seq2_2_2.9e-164</name>
          <branch_length>0.209890037</branch_length>
        </clade>
        <clade>
          <branch_length>0.083151428</branch_length>
          <confidence type="unknown">78</confidence>
          <clade>
            <name>03_Salpingoeca_punica|comp14551_c0_seq1_2_8.6e-141</name>
            <branch_length>0.110884295</branch_length>
          </clade>
          <clade>
            <name>06_Salpingoeca_macrocollata|comp14918_c0_seq1_2_9.3e-133</name>
            <branch_length>0.187099267</branch_length>
          </clade>
        </clade>
      </clade>
      <clade>
        <name>17_Codosiga_hollandica|comp55805_c1_seq1_1_8.2e-157</name>
        <branch_length>0.191919523</branch_length>
      </clade>
    </clade>
    <clade>
      <name>38_Drosophila_melanogaster|FBtr0085254_3_6.5e-131</name>
      <branch_length>1.602217681</branch_length>
    </clade>
    <clade>
      <name>25_Mnemiopsis_leidyi|ML082318_2_1.2e-106</name>
      <branch_length>1.668534211</branch_length>
    </clade>
    <clade>
      <branch_length>1.438239379</branch_length>
      <confidence type="unknown">72</confidence>
      <clade>
        <name>41_Capitella_teleta|159587_2_4.4e-128</name>
        <branch_length>0.178204173</branch_length>
      </clade>
      <clade>
        <branch_length>0.20335421</branch_length>
        <confidence type="unknown">100</confidence>
        <clade>
          <name>36_Pristionchus_pacificus|PPA16770_2_1.4e-114</name>
          <branch_length>0.143606951</branch_length>
        </clade>
        <clade>
          <branch_length>0.207587319</branch_length>
          <confidence type="unknown">100</confidence>
          <clade>
            <name>35_Caenorhabditis_elegans|T05E11.3b_2_2.7e-105</name>
            <branch_length>1.95E-6</branch_length>
          </clade>
          <clade>
            <name>35_Caenorhabditis_elegans|T05E11.3a_3_3.6e-105</name>
            <branch_length>1.95E-6</branch_length>
          </clade>
        </clade>
      </clade>
    </clade>
    <clade>
      <name>23_Ephydatia_muelleri|comp69032_c0_seq1_2_1.6e-116</name>
      <branch_length>1.735684607</branch_length>
    </clade>
    <clade>
      <name>28_Acropora_digitifera|14150_2_1.5e-97</name>
      <branch_length>1.831864068</branch_length>
    </clade>
    <clade>
      <name>27_Nematostella_vectensis|181671_2_8.9e-122</name>
      <branch_length>1.681693482</branch_length>
    </clade>
    <clade>
      <name>34_Strongylocentrotus_purpuratus|148237266_3_4.4e-122</name>
      <branch_length>1.720674974</branch_length>
    </clade>
    <clade>
      <name>22_Oscarella_pearsei|comp39764_c0_seq3_3_4.1e-92</name>
      <branch_length>1.916839136</branch_length>
    </clade>
    <clade>
      <name>24_Amphimedon_queenslandica|Aqu1.228773_2_1.4e-93</name>
      <branch_length>2.021816015</branch_length>
    </clade>
    <clade>
      <name>30_Ciona_intestinalis|ENSCINT00000015093_2_8.1e-95</name>
      <branch_length>2.01828271</branch_length>
    </clade>
    <clade>
      <branch_length>1.834413056</branch_length>
      <confidence type="unknown">98</confidence>
      <clade>
        <name>40_Lottia_gigantea|197084_2_1.7e-75</name>
        <branch_length>0.198858219</branch_length>
      </clade>
      <clade>
        <name>42_Helobdella_robusta|157169_2_2.8e-78</name>
        <branch_length>0.272863246</branch_length>
      </clade>
    </clade>
    <clade>
      <branch_length>2.103449894</branch_length>
      <confidence type="unknown">100</confidence>
      <clade>
        <name>29_Trichoplax_adhaerens|34310_2_2.2e-58</name>
        <branch_length>0.009478431</branch_length>
      </clade>
      <clade>
        <name>29_Trichoplax_adhaerens|64388_3_2.2e-34</name>
        <branch_length>0.002229553</branch_length>
      </clade>
    </clade>
    <clade>
      <name>26_Hydra_vulgaris|Hma2.216489_2_1.5e-77</name>
      <branch_length>2.087950554</branch_length>
    </clade>
    <clade>
      <name>49_Dictyostelium_discoideum|DDB0215015_2_1.2e-56</name>
      <branch_length>2.535248179</branch_length>
    </clade>
    <clade>
      <name>39_Tetranychus_urticae|tetur09g05150_2_1.1e-81</name>
      <branch_length>2.190713095</branch_length>
    </clade>
    <clade>
      <name>52_Chlamydomonas_reinhardtii|Cre02.g080650.t1.2_2_5.2e-121</name>
      <branch_length>1.507901913</branch_length>
    </clade>
    <clade>
      <branch_length>1.291263377</branch_length>
      <confidence type="unknown">68</confidence>
      <clade>
        <name>52_Chlamydomonas_reinhardtii|Cre12.g514850.t1.2_3_3.4e-108</name>
        <branch_length>0.405813459</branch_length>
      </clade>
      <clade>
        <branch_length>0.198142233</branch_length>
        <confidence type="unknown">100</confidence>
        <clade>
          <name>59_Thalassiosira_pseudonana|268500_2_1e-69</name>
          <branch_length>0.552570399</branch_length>
        </clade>
        <clade>
          <name>53_Chondrus_crispus|546306646_3_6.2e-65</name>
          <branch_length>0.490804754</branch_length>
        </clade>
      </clade>
    </clade>
    <clade>
      <name>53_Chondrus_crispus|546314885_2_1.6e-79</name>
      <branch_length>1.772663843</branch_length>
    </clade>
    <clade>
      <name>58_Bigelowiella_natans|53204_2_4.8e-93</name>
      <branch_length>1.886928719</branch_length>
    </clade>
    <clade>
      <name>59_Thalassiosira_pseudonana|22766_3_2.7e-65</name>
      <branch_length>2.130129529</branch_length>
    </clade>
    <clade>
      <name>54_Naegleria_gruberi|627_3_1.5e-64</name>
      <branch_length>2.072660857</branch_length>
    </clade>
    <clade>
      <branch_length>4.87882175</branch_length>
      <confidence type="unknown">100</confidence>
      <clade>
        <name>44_Coprinopsis_cinerea|CC1G_04203T0_3_6.6e-07</name>
        <branch_length>0.550241973</branch_length>
      </clade>
      <clade>
        <name>46_Schizosaccharomyces_pombe|SPAC57A7.04c.1_2_0.0049</name>
        <branch_length>0.422895829</branch_length>
      </clade>
    </clade>
    <clade>
      <name>57_Tetrahymena_thermophila|3704_2_6.7e-68</name>
      <branch_length>1.98718879</branch_length>
    </clade>
    <clade>
      <branch_length>1.814294697</branch_length>
      <confidence type="unknown">100</confidence>
      <clade>
        <name>27_Nematostella_vectensis|153358_3_4.1e-29</name>
        <branch_length>0.233746695</branch_length>
      </clade>
      <clade>
        <branch_length>0.465742729</branch_length>
        <confidence type="unknown">100</confidence>
        <clade>
          <name>14_Savillea_parva|comp15718_c0_seq1_3_4.4e-36</name>
          <branch_length>1.95E-6</branch_length>
        </clade>
        <clade>
          <name>07_Stephanoeca_diplocostata_FR|comp233551_c0_seq1_3_3.1e-11</name>
          <branch_length>1.95E-6</branch_length>
        </clade>
      </clade>
    </clade>
    <clade>
      <branch_length>1.50348719</branch_length>
      <confidence type="unknown">76</confidence>
      <clade>
        <branch_length>0.166300361</branch_length>
        <confidence type="unknown">61</confidence>
        <clade>
          <branch_length>0.058584502</branch_length>
          <confidence type="unknown">51</confidence>
          <clade>
            <branch_length>0.110426142</branch_length>
            <confidence type="unknown">63</confidence>
            <clade>
              <branch_length>0.160084276</branch_length>
              <confidence type="unknown">98</confidence>
              <clade>
                <name>10_Didymoeca_costata|comp10743_c0_seq3_3_8.3e-17</name>
                <branch_length>0.563390679</branch_length>
              </clade>
              <clade>
                <branch_length>0.213675283</branch_length>
                <confidence type="unknown">98</confidence>
                <clade>
                  <name>02_Acanthoeca_spectabilis|comp18553_c0_seq1_3_3.7e-30</name>
                  <branch_length>0.235705954</branch_length>
                </clade>
                <clade>
                  <name>08_Helgoeca_nana|comp20622_c0_seq1_3_9.2e-33</name>
                  <branch_length>0.194457023</branch_length>
                </clade>
              </clade>
            </clade>
            <clade>
              <name>04_Salpingoeca_urceolata|comp14346_c0_seq1_3_3e-23</name>
              <branch_length>0.471622665</branch_length>
            </clade>
          </clade>
          <clade>
            <name>43_Capsaspora_owczarzaki|CAOG_03372T1_3_3.3e-36</name>
            <branch_length>0.466796154</branch_length>
          </clade>
          <clade>
            <branch_length>0.182508803</branch_length>
            <confidence type="unknown">100</confidence>
            <clade>
              <branch_length>0.219738813</branch_length>
              <confidence type="unknown">100</confidence>
              <clade>
                <name>20_Monosiga_brevicollis|31056_3_3.2e-28</name>
                <branch_length>0.370267997</branch_length>
              </clade>
              <clade>
                <name>11_Choanoeca_perplexa|comp14799_c0_seq2_3_2e-31</name>
                <branch_length>0.366735058</branch_length>
              </clade>
            </clade>
            <clade>
              <branch_length>0.065357964</branch_length>
              <confidence type="unknown">62</confidence>
              <clade>
                <branch_length>0.434715115</branch_length>
                <confidence type="unknown">100</confidence>
                <clade>
                  <name>15_Hartaetosiga_balthica|comp5338_c0_seq1_3_1.6e-19</name>
                  <branch_length>0.259100542</branch_length>
                </clade>
                <clade>
                  <name>05_Hartaetosiga_gracilis|comp11020_c0_seq1_3_4.9e-28</name>
                  <branch_length>0.172777647</branch_length>
                </clade>
              </clade>
              <clade>
                <name>21_Salpingoeca_rosetta|PTSG_09228T0_3_5.1e-38</name>
                <branch_length>0.303674665</branch_length>
              </clade>
            </clade>
          </clade>
          <clade>
            <branch_length>0.110892835</branch_length>
            <confidence type="unknown">88</confidence>
            <clade>
              <name>03_Salpingoeca_punica|comp17258_c0_seq1_3_2.4e-38</name>
              <branch_length>0.42355223</branch_length>
            </clade>
            <clade>
              <name>06_Salpingoeca_macrocollata|comp21380_c0_seq3_3_2.5e-29</name>
              <branch_length>0.432498356</branch_length>
            </clade>
            <clade>
              <branch_length>0.142049055</branch_length>
              <confidence type="unknown">100</confidence>
              <clade>
                <name>19_Mylnosiga_fluctuans|comp12318_c0_seq1_3_8.2e-33</name>
                <branch_length>0.195229871</branch_length>
              </clade>
              <clade>
                <name>18_Salpingoeca_helianthica|comp24100_c0_seq1_3_2.1e-36</name>
                <branch_length>0.282387802</branch_length>
              </clade>
            </clade>
          </clade>
          <clade>
            <name>09_Salpingoeca_kvevrii|comp10891_c0_seq2_3_5.9e-32</name>
            <branch_length>0.494592959</branch_length>
          </clade>
        </clade>
        <clade>
          <branch_length>0.322019005</branch_length>
          <confidence type="unknown">91</confidence>
          <clade>
            <name>57_Tetrahymena_thermophila|3828_3_1.9e-26</name>
            <branch_length>0.933419044</branch_length>
          </clade>
          <clade>
            <name>49_Dictyostelium_discoideum|DDB0185036_3_9.2e-13</name>
            <branch_length>0.680228046</branch_length>
          </clade>
        </clade>
        <clade>
          <name>25_Mnemiopsis_leidyi|ML182510_3_4.5e-18</name>
          <branch_length>0.877043554</branch_length>
        </clade>
        <clade>
          <name>36_Pristionchus_pacificus|PPA15324_3_3.9e-39</name>
          <branch_length>1.033393137</branch_length>
        </clade>
        <clade>
          <branch_length>0.289214562</branch_length>
          <confidence type="unknown">79</confidence>
          <clade>
            <name>28_Acropora_digitifera|05592_3_1.2e-13</name>
            <branch_length>0.627911048</branch_length>
          </clade>
          <clade>
            <branch_length>0.089031554</branch_length>
            <confidence type="unknown">94</confidence>
            <clade>
              <name>30_Ciona_intestinalis|ENSCINT00000008611_3_4.9e-12</name>
              <branch_length>0.69662597</branch_length>
            </clade>
            <clade>
              <name>41_Capitella_teleta|223831_3_4.5e-20</name>
              <branch_length>0.407743837</branch_length>
            </clade>
            <clade>
              <name>42_Helobdella_robusta|191087_3_2.6e-09</name>
              <branch_length>0.473143482</branch_length>
            </clade>
            <clade>
              <name>40_Lottia_gigantea|237567_3_3.3e-12</name>
              <branch_length>0.587304797</branch_length>
            </clade>
          </clade>
        </clade>
      </clade>
      <clade>
        <name>58_Bigelowiella_natans|133429_3_1.5e-14</name>
        <branch_length>0.640342813</branch_length>
      </clade>
    </clade>
    <clade>
      <name>48_Yarrowia_lipolytica|YALI0E21373g_3_2.9e-10</name>
      <branch_length>4.271113952</branch_length>
    </clade>
    <clade>
      <name>39_Tetranychus_urticae|tetur15g00320_3_4.4e-05</name>
      <branch_length>5.336714985</branch_length>
    </clade>
    <clade>
      <name>12_Salpingoeca_infusionum|comp13938_c0_seq4_3_1.3e-07</name>
      <branch_length>2.149270166</branch_length>
    </clade>
    <clade>
      <name>17_Codosiga_hollandica|comp58640_c1_seq1_2_1.7e-133</name>
      <branch_length>1.091475185</branch_length>
    </clade>
    <clade>
      <branch_length>1.009440844</branch_length>
      <confidence type="unknown">98</confidence>
      <clade>
        <branch_length>0.059680452</branch_length>
        <confidence type="unknown">98</confidence>
        <clade>
          <name>01_Diaphanoeca_grandis|comp33941_c0_seq1_1_1.3e-252</name>
          <branch_length>0.132494838</branch_length>
        </clade>
        <clade>
          <branch_length>0.043296828</branch_length>
          <confidence type="unknown">81</confidence>
          <clade>
            <name>10_Didymoeca_costata|comp16662_c0_seq1_1_5.8e-235</name>
            <branch_length>0.253619246</branch_length>
          </clade>
          <clade>
            <branch_length>0.127789569</branch_length>
            <confidence type="unknown">100</confidence>
            <clade>
              <name>07_Stephanoeca_diplocostata_FR|comp18659_c0_seq1_1_2.5e-250</name>
              <branch_length>0.00103789</branch_length>
            </clade>
            <clade>
              <name>07_Stephanoeca_diplocostata_AU|comp17923_c0_seq1_1_3.6e-250</name>
              <branch_length>0.001149778</branch_length>
            </clade>
          </clade>
        </clade>
      </clade>
      <clade>
        <branch_length>0.062732646</branch_length>
        <confidence type="unknown">100</confidence>
        <clade>
          <branch_length>0.051695269</branch_length>
          <confidence type="unknown">100</confidence>
          <clade>
            <name>07_Stephanoeca_diplocostata_AU|comp229666_c0_seq1_3_4.8e-20</name>
            <branch_length>1.95E-6</branch_length>
          </clade>
          <clade>
            <name>14_Savillea_parva|comp11889_c0_seq1_1_3.1e-268</name>
            <branch_length>1.95E-6</branch_length>
          </clade>
        </clade>
        <clade>
          <branch_length>0.023304909</branch_length>
          <confidence type="unknown">97</confidence>
          <clade>
            <name>02_Acanthoeca_spectabilis|comp16982_c0_seq1_1_1.7e-257</name>
            <branch_length>0.088463827</branch_length>
          </clade>
          <clade>
            <name>08_Helgoeca_nana|comp19911_c0_seq1_1_4.8e-263</name>
            <branch_length>0.05685205</branch_length>
          </clade>
        </clade>
      </clade>
    </clade>
    <clade>
      <branch_length>0.971745839</branch_length>
      <confidence type="unknown">95</confidence>
      <clade>
        <branch_length>0.042397819</branch_length>
        <confidence type="unknown">98</confidence>
        <clade>
          <name>20_Monosiga_brevicollis|20370_1_2.9e-280</name>
          <branch_length>0.04850724</branch_length>
        </clade>
        <clade>
          <name>11_Choanoeca_perplexa|comp12598_c0_seq1_1_6.5e-260</name>
          <branch_length>0.155554935</branch_length>
        </clade>
      </clade>
      <clade>
        <branch_length>0.014887118</branch_length>
        <confidence type="unknown">70</confidence>
        <clade>
          <name>12_Salpingoeca_infusionum|comp16295_c0_seq1_1_2.9e-258</name>
          <branch_length>0.141751531</branch_length>
        </clade>
        <clade>
          <branch_length>0.021284021</branch_length>
          <confidence type="unknown">87</confidence>
          <clade>
            <branch_length>0.041463249</branch_length>
            <confidence type="unknown">100</confidence>
            <clade>
              <name>21_Salpingoeca_rosetta|PTSG_02153T0_1_3.1e-264</name>
              <branch_length>0.07267651</branch_length>
            </clade>
            <clade>
              <name>13_Microstomoeca_roanoka|comp14051_c1_seq1_1_4.2e-250</name>
              <branch_length>0.090535839</branch_length>
            </clade>
          </clade>
          <clade>
            <branch_length>0.092007889</branch_length>
            <confidence type="unknown">100</confidence>
            <clade>
              <name>05_Hartaetosiga_gracilis|comp11541_c0_seq1_1_8.6e-255</name>
              <branch_length>0.057801802</branch_length>
            </clade>
            <clade>
              <name>15_Hartaetosiga_balthica|comp3801_c0_seq1_1_1.5e-239</name>
              <branch_length>0.09440847</branch_length>
            </clade>
          </clade>
        </clade>
      </clade>
    </clade>
    <clade>
      <name>17_Codosiga_hollandica|comp58640_c0_seq2_3_2.4e-129</name>
      <branch_length>1.081514526</branch_length>
    </clade>
    <clade>
      <branch_length>0.993786915</branch_length>
      <confidence type="unknown">78</confidence>
      <clade>
        <branch_length>0.030365109</branch_length>
        <confidence type="unknown">86</confidence>
        <clade>
          <name>03_Salpingoeca_punica|comp14551_c2_seq1_1_3.6e-266</name>
          <branch_length>0.080616871</branch_length>
        </clade>
        <clade>
          <name>06_Salpingoeca_macrocollata|comp10563_c0_seq1_1_1.4e-248</name>
          <branch_length>0.113631228</branch_length>
        </clade>
      </clade>
      <clade>
        <branch_length>0.049034331</branch_length>
        <confidence type="unknown">100</confidence>
        <clade>
          <name>18_Salpingoeca_helianthica|comp15797_c0_seq1_1_5.8e-272</name>
          <branch_length>0.090539468</branch_length>
        </clade>
        <clade>
          <name>19_Mylnosiga_fluctuans|comp10301_c0_seq1_1_4.3e-273</name>
          <branch_length>0.070691616</branch_length>
        </clade>
      </clade>
    </clade>
    <clade>
      <branch_length>0.996383415</branch_length>
      <confidence type="unknown">70</confidence>
      <clade>
        <name>04_Salpingoeca_urceolata|comp20569_c0_seq1_1_5e-262</name>
        <branch_length>0.111959069</branch_length>
      </clade>
      <clade>
        <name>09_Salpingoeca_kvevrii|comp8076_c0_seq1_1_6.8e-263</name>
        <branch_length>0.123275533</branch_length>
      </clade>
    </clade>
    <clade>
      <branch_length>1.093774549</branch_length>
      <confidence type="unknown">100</confidence>
      <clade>
        <name>22_Oscarella_pearsei|comp24853_c0_seq1_1_4.5e-217</name>
        <branch_length>1.95E-6</branch_length>
      </clade>
      <clade>
        <name>22_Oscarella_pearsei|comp22938_c0_seq1_2_1.2e-94</name>
        <branch_length>1.95E-6</branch_length>
      </clade>
    </clade>
    <clade>
      <name>41_Capitella_teleta|159573_1_1.2e-232</name>
      <branch_length>1.023113206</branch_length>
    </clade>
    <clade>
      <branch_length>0.905731359</branch_length>
      <confidence type="unknown">87</confidence>
      <clade>
        <name>33_Branchiostoma_floridae|274326_3_4.5e-218</name>
        <branch_length>0.081607051</branch_length>
      </clade>
      <clade>
        <branch_length>0.078800671</branch_length>
        <confidence type="unknown">95</confidence>
        <clade>
          <name>33_Branchiostoma_floridae|62899_2_2.4e-222</name>
          <branch_length>0.010639562</branch_length>
        </clade>
        <clade>
          <name>33_Branchiostoma_floridae|119839_1_2.5e-224</name>
          <branch_length>0.006682107</branch_length>
        </clade>
      </clade>
    </clade>
    <clade>
      <branch_length>0.869075941</branch_length>
      <confidence type="unknown">73</confidence>
      <clade>
        <branch_length>0.045965803</branch_length>
        <confidence type="unknown">97</confidence>
        <clade>
          <name>31_Gasterosteus_aculeatus|ENSGACT00000017921_2_1.5e-225</name>
          <branch_length>0.084485952</branch_length>
        </clade>
        <clade>
          <name>32_Mus_musculus|118130847_1_2.4e-220</name>
          <branch_length>0.149754189</branch_length>
        </clade>
      </clade>
      <clade>
        <branch_length>0.022480932</branch_length>
        <confidence type="unknown">54</confidence>
        <clade>
          <branch_length>0.228822845</branch_length>
          <confidence type="unknown">100</confidence>
          <clade>
            <name>32_Mus_musculus|146134469_2_4.4e-190</name>
            <branch_length>1.95E-6</branch_length>
          </clade>
          <clade>
            <name>32_Mus_musculus|568978836_3_5.9e-190</name>
            <branch_length>1.95E-6</branch_length>
          </clade>
        </clade>
        <clade>
          <branch_length>0.044224894</branch_length>
          <confidence type="unknown">98</confidence>
          <clade>
            <name>31_Gasterosteus_aculeatus|ENSGACT00000017081_3_2.1e-222</name>
            <branch_length>0.063082322</branch_length>
          </clade>
          <clade>
            <name>31_Gasterosteus_aculeatus|ENSGACT00000017054_1_4.6e-229</name>
            <branch_length>0.086942999</branch_length>
          </clade>
        </clade>
      </clade>
    </clade>
  </clade>
</phylogeny>

</phyloxml>
