# Supplementary material for: Gene family innovation, conservation and loss on the animal stem lineage
Source: eLife journal article supplement (doi:10.7554/elife.34226), 2018-05-31
Supplement: supp [file elife-34226-supp-v1.zip › elife_poa_e34226_Figure_4_figure_supplement_1.pdf]

|                                               | 606                         | 642                             | 670                                     |
|-----------------------------------------------|-----------------------------|---------------------------------|-----------------------------------------|
| <i>H. sapiens</i> SARM1   Q6SZW1 / 724        | KL IQSVMGARNFVLVLS PG - -   | ALDKCM - - QDHDCKDWVHKE I       | VTAL SCGKNI VPI ID - GF - -             |
| <i>G. aculeatus</i>   ENSGACP0000011356 / 722 | KL IQSVQRRARNFILVLSAN - -   | ALDNCM - - GDTAMKDWVHKE I       | VTAL TCKKNI VPVTD - QF - -              |
| <i>M. musculus</i>   40254247 / 724           | KL IQSVI AARNFVLVLSAG - -   | ALDKCM - - QDHDCKDWVHKE I       | VTAL SCGKNI VPI ID - GF - -             |
| <i>M. musculus</i>   281183137 / 764          | KL IQSVI AARNFVLVLSAG - -   | ALDKCM - - QDHDCKDWVHKE I       | VTAL SCGKNI VPI ID - GF - -             |
| <i>B. floridae</i>   84448 / 265              | KLLENVKKAKNFILVLTPD - -     | ALDRCI - - TDTEGKDWVRKE I       | VAAI ESSCNI VPVMS - SF - -              |
| <i>B. floridae</i>   95677 / 455              | KLLENVKKAKNFILVLTPD - -     | ALDRCI - - TDTEGKDWVRKE I       | VTAL SCGKNI VPI ID - GF - -             |
| <i>C. elegans</i>   F13B10.1a / 930           | SLLKNIQAAKHFILVLTPN - -     | SLDRLL - - NDDNCDWVHKE I        | KCAFEHQKNI IPI FDTAF - -                |
| <i>C. elegans</i>   F13B10.1b / 586           | SLLKNIQAAKHFILVLTPN - -     | SLDRLL - - NDDNCDWVHKE I        | KCAFEHQKNI IPI FDTAF - -                |
| <i>C. elegans</i>   F13B10.1c / 1000          | SLLKNIQAAKHFILVLTPN - -     | SLDRLL - - NDDNCDWVHKE I        | KCAFEHQKNI IPI FDTAF - -                |
| <i>C. elegans</i>   F13B10.1d / 343           | SLLKNIQAAKHFILVLTPN - -     | SLDRLL - - NDDNCDWVHKE I        | KCAFEHQKNI IPI FDTAF - -                |
| <i>C. elegans</i>   F13B10.1e / 801           | SLLKNIQAAKHFILVLTPN - -     | SLDRLL - - NDDNCDWVHKE I        | KCAFEHQKNI IPI FDTAF - -                |
| <i>S. purpuratus</i>   390340396 / 580        | NLLNSVRS AKSFVMVLSSG - -    | SLDRCM - - GDRDHKDWVHRE I       | VTAL ECKCNI VPVID - NF - -              |
| <i>P. pacificus</i>   PPA00957 / 418          | SLLKNIQAAKHFILVLTPN - -     | SLDRLL - - NDVNCDDWI HKELRCAFEH | NKNI IPI FDOHF - - EFPDRENDI PQ         |
| <i>S. punica</i>   m.187860 / 177             | ELMAHI DRARVFVPL ITRDYI     | DANRLS - - - - QEEDMCR AELQHAL  | DGGKLI VPAMHCRD - - CLDVAK - AAPP       |
| <i>S. urceolata</i>   m.72404 / 807           | ALLDNLHRSKAVVVVLTEG - -     | SLDRTL - - TEAAGSDWMRTE I       | NTSLTLSKRI VPVLF - EF - -               |
| <i>S. urceolata</i>   m.372710 / 1013         | ALLQCLKSSTNVVL ILTGK - -    | ALDRCLTCSPTCDQDWVRRE I          | AVALEHKLNLVPVLAREF - - LFPPPE - KLPS    |
| <i>S. macrocollata</i>   m.214275 / 160       | ALEEGIDRSRVFVPI ITPDYL      | KLRLR - - - - KSDDVCLKEVMMAL    | SKGKPAVPI VEDAFMKCFDVI E - QFPP         |
| <i>S. dolichothecata</i>   m.124753 / 543     | ALLRNIRGAPAFVSI VTPEYFNI    | ERMN - - - - SEVDFCRKE I        | EEAVSLDKHI IPI IQEKF - NCFAVIK - DLPE   |
| <i>M. fluctuans</i>   m.58240 / 444           | QLRAHAAAAPLEIPVITNEYISL     | QRLN - - GDI - - DFVRL E        | FQSAL AARRVLPVI VEGF - NDWQANI - KLIQ   |
| <i>D. pulex</i>   47049 / 893                 | NLLQSI SQAKYFLLVLTPN - -    | ALDRCL - - GDDERKDWVHRE I       | VAALESNCKI IPI ID - NF - -              |
| <i>D. melanogaster</i>   FBpp0306073 / 1704   | GLLNSIRQAKNFVLVLTPD - -     | ALHRCI - - NDEDCKDWVHRE I       | VAAALNSNCNI IPI IDQQF - - DWPEVE - RLPE |
| <i>D. melanogaster</i>   FBpp0293530 / 1637   | GLLNSIRQAKNFVLVLTPD - -     | ALHRCI - - NDEDCKDWVHRE I       | VAAALNSNCNI IPI IDQQF - - DWPEVE - RLPE |
| <i>D. melanogaster</i>   FBpp0293531 / 1052   | GLLNSIRQAKNFVLVLTPD - -     | ALHRCI - - NDEDCKDWVHRE I       | VAAALNSNCNI IPI IDQQF - - DWPEVE - RLPE |
| <i>D. melanogaster</i>   FBpp0293532 / 1360   | GLLNSIRQAKNFVLVLTPD - -     | ALHRCI - - NDEDCKDWVHRE I       | VAAALNSNCNI IPI IDQQF - - DWPEVE - RLPE |
| <i>D. melanogaster</i>   FBpp0293533 / 1562   | GLLNSIRQAKNFVLVLTPD - -     | ALHRCI - - NDEDCKDWVHRE I       | VAAALNSNCNI IPI IDQQF - - DWPEVE - RLPE |
| <i>D. melanogaster</i>   FBpp0293534 / 1386   | GLLNSIRQAKNFVLVLTPD - -     | ALHRCI - - NDEDCKDWVHRE I       | VAAALNSNCNI IPI IDQQF - - DWPEVE - RLPE |
| <i>D. melanogaster</i>   FBpp0293535 / 1730   | GLLNSIRQAKNFVLVLTPD - -     | ALHRCI - - NDEDCKDWVHRE I       | VAAALNSNCNI IPI IDQQF - - DWPEVE - RLPE |
| <i>D. melanogaster</i>   FBpp0293536 / 1059   | GLLNSIRQAKNFVLVLTPD - -     | ALHRCI - - NDEDCKDWVHRE I       | VAAALNSNCNI IPI IDQQF - - DWPEVE - RLPE |
| <i>L. gigantea</i>   114826 / 677             | NLLLSIKLSRNFVLI LTPE - -    | SLDRCI - - GDAEREDWVHRE I       | VAALESNCKI IPI IDQQF - - DWPEVE - RLPE  |
| <i>C. teleta</i>   109588 / 694               | NLLKSI KLA KHFI LVLT PN - - | ALDRCI - - GDNDQKDWVHKE I       | TTAMAGGCNI I PLMD - NF - -              |
| <i>H. robdella</i>   75616 / 700              | NLLNSVRNARNFVLVLTPT - -     | SLDRCV - - GDAEQKDWVHRE I       | VAAI EAGCNI I PVLD - SF - -             |
| <i>T. urticae</i>   tetur10g03800 / 963       | SLITSIHSSRNFI LVLT PN - -   | ALDRCI - - GDV DCKDWI HRE I     | VAA MNGGCNI I PVID - NF - -             |
| <i>E. muelleri</i>   m.46414 / 676            | NILLNI ADSSNFVLLLT PN - -   | CLDRCA - - GDTLI QDWVHRE I      | RCALQNGVPVI PVTN - NF - -               |
|                                               |                             |                                 | EWPSKT DHFPD                            |
