# Supplementary material for: Gene family innovation, conservation and loss on the animal stem lineage
Source: eLife journal article supplement (doi:10.7554/elife.34226), 2018-05-31

Protein Domain Content (in any order)

- no transmembrane, Pkinase, TIR
- transmembrane, LRR, Pkinase, TIR
- no transmembrane, LRR, Pkinase
- transmembrane, LRR, Pkinase
- no transmembrane, TIR
- transmembrane, LRR, TIR

Group

- Animal
- Choanoflagellate
- Plant
- Other

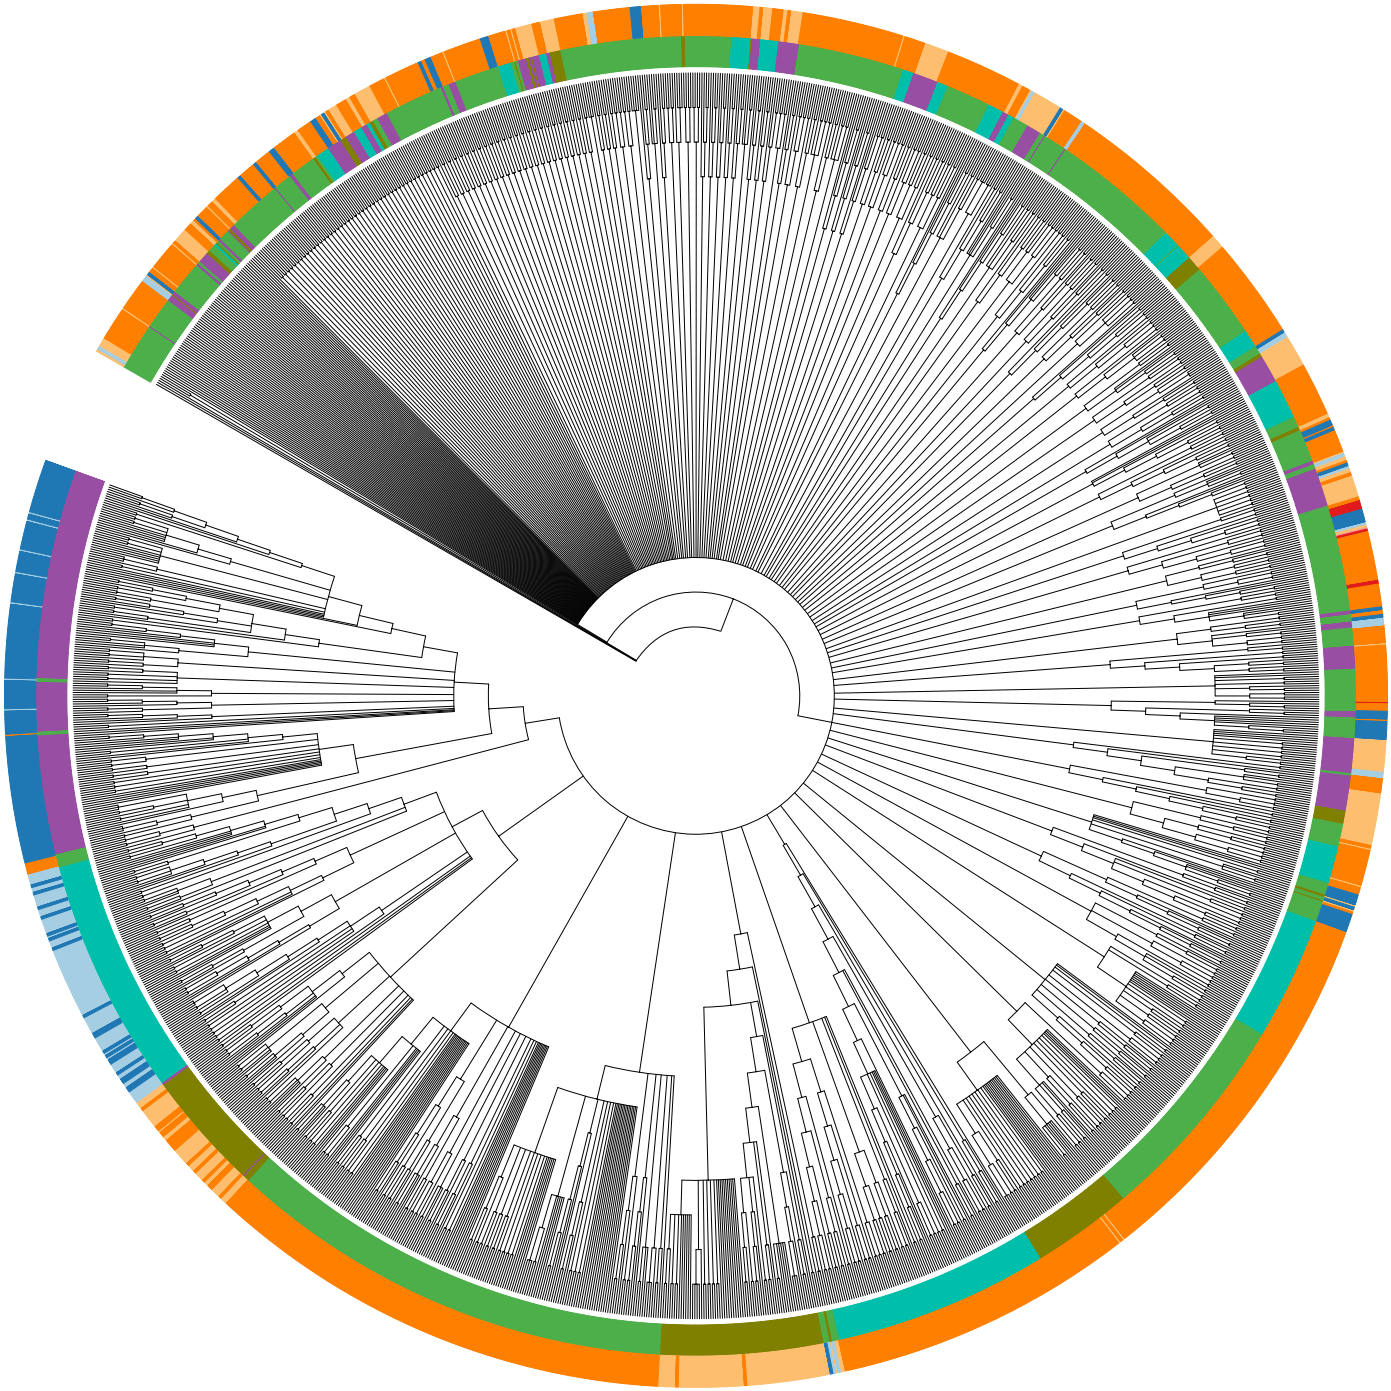

Supplement: supp [file elife-34226-supp-v1.zip › elife_poa_e34226_Figure_4_figure_supplement_2.pdf]
