# Supplementary material for: Gene family innovation, conservation and loss on the animal stem lineage
Source: eLife journal article supplement (doi:10.7554/elife.34226), 2018-05-31
Supplement: supp [file elife-34226-supp-v1.zip › elife_poa_e34226_Supplementary_File_1.xlsx]

## Sheet: 1 Information by species
		Strain information							Origin of cultures			Growth media, antibiotic treatments and cell types									Culture conditions in large batches for harvesting							Amount of total RNA used for each sample and groupings for preparation and sequencing							Read counts and quality trimming									Read error correction				Assembly read counts and N50s
															Approximate Percentage of Cell Types																				Before Trimming				After Trimming					Reptile parameters				Initial assembly	After decontamination
Internal ID	Species Name	Strain	ATCC Number	NCBI Taxonomy ID	Group	Previous Name for Culture (if any)	Previous Name for Species (if any)	Habitat	Source	Isolation Location (if known)	Isolation Year (if known)	Growth Medium	Growth Temp. (C)	Successful Antibiotic Treatment(s) (in order)	Attached, single cell	Slow swimmer	Fast swimmer	Colonial, swimming	Colonial, attached	Passively suspended	Growth Vessel	Growth Volume Per Vessel (ml)	Number of Vessels	Filtration During Collection?	Growth Duration	Ratio of Culture:Fresh Medium to Seed Growth	Centrifuge Time (min)	Total RNA Used (µg)	Est. Proportion of Choanoflagellate RNA	Est. Amount of Choanoflagellate Total RNA Used (µg)	Bioanalyzer RNA Integrity Number (if calculated)	TruSeq Adapter	Library Prep. Group	Seq. Flow Cell Group	Num. Read Pairs	% of Phred-like Q30 Bases	Mean Quality Score (Phred-like)	Total Bases (Gb)	Num. Read Pairs	Num. Singletons	% of Phred-like Q30 Bases	Mean Quality Score (Phred-like)	Total Bases (Gb)	QThreshold	T_expGoodCnt	T_card	Qlb	Num. Contigs	Num. Contigs
1	Diaphanoeca grandis		50111	28014	Tectiform Loricate			marine	Barry Leadbeater	Narragansett Bay, RI, USA	1982	ASW + quinoa	10	S	0	0	0	0	0	100	4 L glass flask	1000	1	yes	6 weeks	01:10:00	60	7	0.3	2	9.2	1	B	E	47902988	85.1	33.8	9.6	45923629	1493563	87.4	34.5	8.8	73	24	10	64	96708	94346
2	Acanthoeca spectabilis	Virginia	PRA-387	81533	Nudiform Loricate			marine	This study	Shallow lagoon, Hog Island, VA, USA	2007	10% CGM.3	10	S, R	90	0	10	0	0	0	150 mm dish	50	5	no	3 weeks	01:10:00	20	8	0.1	0.8	8.3	2	B	E	59109470	82.1	32.7	11.8	56139245	2155863	85.7	34	10.6	73	26	11	64	69647	65910
3	Salpingoeca punica		50788	1924735	Clade 2 Craspedid	Salpingoeca amphoridium		freshwater	ATCC			10% FCGM.3 + HEPES	15	S, O	100	0	0	0	0	0	150 mm dish	50	5	no	4 weeks	01:17:00	20	1	0.8	0.8	N/A	3	D	G	30661113	84.2	33.2	6.1	28741956	1332813	85.8	33.8	5.5	72	22	9	64	58487	55787
4	Salpingoeca urceolata		50560	473813	Clade 2 Craspedid			marine	Barry Leadbeater	Contaminant in Porphyra sp. culture, Wellington, New Zealand	1987	ASW + quinoa	15	K	95	0	0	0	0	5	150 mm dish	50	5	yes	5 weeks	01:25:00	20	2	0.75	1.3	N/A	4	B	E	64292051	81.2	32.4	12.9	60834761	2543719	85.3	33.9	11.4	73	24	9	63	93228	90524
5	Hartaetosiga gracilis		50454	216892	Clade 1 Craspedid	Codosiga gracilis	Codonosiga gracilis	marine	ATCC	Tide pool on the salt marsh at Freiston Shore, Lincolnshire, England	1972	OE	15	S, K	50	0	0	0	50	0	150 mm dish	50	5	no	3 weeks	01:25:00	20	3	0.6	2	N/A	5	A	F	26704737	89.9	35.2	5.3	25593984	788887	89.6	35	5	73	28	11	65	43983	41886
6	Salpingoeca macrocollata		50938	1924736	Clade 2 Craspedid	Salpingoeca minuta		marine	Barry Leadbeater	Wet salt marsh sediment, Hog Island, VA, USA	2001	OE	15	none	95	5	0	0	0	0	150 mm dish	50	5	no	4 weeks	01:25:00	20	4	0.4	1.7	7.4	6	C	F	26880591	83.7	33	5.4	25031061	1315447	86.1	33.9	4.8	72	28	11	64	67579	65564
7.1	Stephanoeca diplocostata	Australia	PRA-392	81535	Tectiform Loricate			marine	Barry Leadbeater	Swan Bay, Queenscliff, Victoria, Australia	1996	OE	15	none	0	0	0	0	0	100	2 L glass flask	500	2	yes	4 weeks	1:5	40	2	0.2	0.5	7.8	21	C	F	28367867	87.5	34.3	5.7	26688470	1051653	87.9	34.4	5.2	73	16	7	65	150915	146302
7.2	Stephanoeca diplocostata	France	50456	81535	Tectiform Loricate			marine	Barry Leadbeater	Rock pool at Le Cabellou, South Brittany, France	1976	OE	15	none	0	0	0	0	0	100	2 L glass flask	500	2	yes	4 weeks	1:5	40	3	0.25	0.7	8.2	7	A	G	29340174	87.1	34.2	5.9	27742111	1093209	87.5	34.3	5.4	73	16	7	65	176114	173140
8	Helgoeca nana		50073	530540	Nudiform Loricate	Acanthoecopsis unguiculata	Acanthocorbis nana	marine	Barry Leadbeater	Lower Narragansett Bay, RI, USA	1981	ASW + quinoa	4	K	90	0	10	0	0	0	150 mm dish	50	10	yes	2 weeks	01:10:00	20	36	0.02	0.7	9.3	8	A	E	58673144	81.3	32.5	11.7	55403034	2275888	85.1	33.8	10.4	73	22	8	63	84991	81376
9	Salpingoeca kvevrii		50929	1924737	Clade 2 Craspedid	Salpingoeca pyxidium		marine	Barry Leadbeater	Salt marsh sediment, Hog Island, VA, USA	1999	OE	15	none	95	5	0	0	0	0	150 mm dish	50	5	no	1 week	01:25:00	20	5	0.2	1	9.0	9	A	F	28832395	84.8	33.3	5.8	26905417	1272020	86.5	33.9	5.2	72	32	13	64	39948	36907
10	Didymoeca costata		PRA-389	459534	Tectiform Loricate	Diplotheca costata	Volkanus costatus	marine	Barry Leadbeater	Swan Bay, Queenscliff, Victoria, Australia	1996	OE	15	G, K, S	0	0	0	0	0	100	150 mm dish	50	5	yes	5 weeks	01:17:00	40	1	0.25	0.3	7.9	10	D	G	23189370	90.3	35.4	4.6	22170815	707563	89.7	35.1	4.4	73	28	12	65	70319	67769
11	Choanoeca perplexa		50453	81531	Clade 1 Craspedid		Proterospongia choanojuncta	marine	ATCC	Atlantic Ocean off Plymouth, England	1977	OE	15	S	95	5	0	0	0	0	150 mm dish	50	5	no	1 week	01:25:00	20	4	0.5	2	8.4	11	D	G	26208173	88.2	34.6	5.2	24965485	853950	88.2	34.6	4.9	73	24	10	65	51450	49314
12	Salpingoeca infusionum		50559	86018	Clade 1 Craspedid			marine	ATCC			10% CGM.3	25	K, O	80	20	0	0	0	0	150 mm dish	50	1	no	5 days	01:25:00	20	3	0.8	2	N/A	12	B	E	54460558	86.2	34.2	10.9	52406615	1532467	88.1	34.8	10.1	73	40	17	65	76265	69565
13	Microstomoeca roanoka		50931	1923864	Clade 1 Craspedid			marine	Barry Leadbeater	Dry salt marsh sediment, Hog Island, VA, USA	2000	OE	15	none	40	0	0	0	60	0	150 mm dish	50	5	no	3 weeks	01:25:00	20	4	0.25	1.1	N/A	13	D	G	31320875	87.7	34.4	6.3	29678035	1124580	88.1	34.6	5.8	73	28	11	65	66631	63648
14	Savillea parva		PRA-391	1909275	Nudiform Loricate	Savillea micropora	Ellisiella parva	marine	Barry Leadbeater	Four-Mile Bridge, Pontrhydybont, Anglesey, Wales	2000	ASW + quinoa	15	S	100	0	0	0	0	0	150 mm dish	50	10	yes	3 weeks	01:25:00	20	10	0.02	0.2	8.8	14	C	F	25823530	86	33.8	5.2	24301241	999037	87	34.1	4.7	73	14	5	64	56032	53868
15	Hartaetosiga balthica		50964	1194294	Clade 1 Craspedid	Monosiga gracilis	Codosiga balthica	marine	ATCC	Salt marsh sediment, Cattleshed Marsh, VA, USA	2000	10% CGM.3	25	S	80	0	0	0	20	0	150 mm dish	50	1	no	3 days	01:25:00	20	3	0.4	1.3	7.4	15	C	F	31588205	90.2	35.3	6.3	30128646	997159	89.8	35.2	5.9	73	32	13	66	29733	27819
16	Salpingoeca dolichothecata		50959	1742605	Clade 3 Craspedid	Salpingoeca gracilis		marine	ATCC	Surface of an old microbial mat of a flooded salt pan, Great Marsh, DE, USA		25% CGM.3	25	none	100	0	0	0	0	0	75 cm flask	60	5	yes	7 weeks	01:20:00	20	1	0.35	0.4	7.2	16	C	F	28860561	87.1	34.2	5.8	27208049	1168210	87.9	34.5	5.3	73	20	8	65	83804	81378
17	Codosiga hollandica		PRA-388	1742608	Clade 2 Craspedid			freshwater	This study	Waterfall at Levada do Risco, 1000m above sea level, Madeira, Portugal	2008	10% FCGM.3	25	O	95	0	0	0	5	0	150 mm dish	50	10	yes	2.5 weeks	01:25:00	20	2	0.3	0.5	8.3	27	D	G	35448171	85.6	33.6	7.1	33256404	1434066	86.6	34	6.4	73	14	6	64	146690	144253
18	Salpingoeca helianthica		50153	1928494	Clade 2 Craspedid	Salpingoeca napiformis		freshwater	ATCC	Biomphalaria glabrata aquarium culture, Rockville, MD, USA	1985	25% FCGM.3	25	C, A, E	5	15	20	60	0	0	1 L glass flask	200	1	no	4 days	01:10:00	20	2	0.85	2	N/A	18	B	E	64254414	81.1	32.4	12.9	60785553	2513341	85.2	33.9	11.4	73	24	9	63	48771	46142
19	Mylnosiga fluctuans		50635	1928486	Clade 2 Craspedid	Monosiga ovata		freshwater	Barry Leadbeater	Freshwater pond, Yaroslavl, Russia	1979	25% FCGM.3	25	O	15	10	0	0	0	75	150 mm dish	50	5	no	5 days	01:10:00	20	7	0.2	1.4	N/A	19	A	G	27246933	83.6	33	5.4	25445253	1202171	85.5	33.6	4.9	72	22	9	64	45242	42781
[truncated: 14 more columns]
