# Supplementary material for: Gene family innovation, conservation and loss on the animal stem lineage
Source: eLife journal article supplement (doi:10.7554/elife.34226), 2018-05-31
Supplement: supp [file elife-34226-supp-v1.zip › elife_poa_e34226_Supplementary_File_2.xlsx]

## Sheet: 2 BUSCO
Internal ID	Species Name	Complete	Complete and Single-Copy	Complete and Duplicated	Fragmented	Missing
1	Diaphanoeca grandis	93.8	92.1	1.7	2.6	3.6
2	Acanthoeca spectabilis	95	92.7	2.3	0.7	4.3
3	Salpingoeca punica	93.7	91.7	2	3.6	2.7
4	Salpingoeca urceolata	94.7	85.8	8.9	1.7	3.6
5	Hartaetosiga gracilis	91.1	87.5	3.6	5	3.9
6	Salpingoeca macrocollata	93.1	88.1	5	2.6	4.3
7	Stephanoeca diplocostata	88.1	84.8	3.3	4	7.9
8	Helgoeca nana	95	92.4	2.6	0.7	4.3
9	Salpingoeca kvevrii	94.7	85.8	8.9	1.7	3.6
10	Didymoeca costata	96	92.7	3.3	0.3	3.7
11	Choanoeca perplexa	93.4	87.8	5.6	3	3.6
12	Salpingoeca infusionum	91.4	87.1	4.3	3.6	5
13	Microstomoeca roanoka	94.1	90.8	3.3	2.3	3.6
14	Savillea parva	92.8	91.1	1.7	2.6	4.6
15	Hartaetosiga balthica	92.5	90.8	1.7	2.6	4.9
16	Salpingoeca dolichothecata	95.1	91.1	4	2.6	2.3
17	Codosiga hollandica	91.1	75.9	15.2	3.6	5.3
18	Salpingoeca helianthica	93.1	90.1	3	2.6	4.3
19	Mylnosiga fluctuans	95.1	92.1	3	1.7	3.2
20	Monosiga brevicollis	82.9	81.2	1.7	7.6	9.5
21	Salpingoeca rosetta	88.8	86.5	2.3	5.3	5.9
22	Oscarella pearsei	97.4	94.1	3.3	1.3	1.3
23	Ephydatia muelleri	95.7	93.1	2.6	0	4.3
24	Amphimedon queenslandica	95	88.1	6.9	3.3	1.7
25	Mnemiopsis leidyi	87.5	85.8	1.7	6.6	5.9
26	Hydra vulgaris	80.2	75.6	4.6	15.8	4
27	Nematostella vectensis	97.7	94.7	3	2	0.3
28	Acropora digitifera	54.1	50.8	3.3	26.7	19.2
29	Trichoplax adhaerens	96.7	96.4	0.3	1.7	1.6
30	Ciona intestinalis	89.5	84.5	5	5	5.5
31	Gasterosteus aculeatus	97.7	65.7	32	1.3	1
32	Mus musculus	100	81.5	18.5	0	0
33	Branchiostoma floridae	98.7	37	61.7	0.7	0.6
34	Strongylocentrotus purpuratus	95.3	78.5	16.8	3.3	1.4
35	Caenorhabditis elegans	99.6	89.4	10.2	0.3	0.1
36	Pristionchus pacificus	79.6	76.6	3	10.6	9.8
37	Daphnia pulex	97.7	94.1	3.6	0	2.3
38	Drosophila melanogaster	100	69.3	30.7	0	0
39	Tetranychus urticae	91	85.1	5.9	3.3	5.7
40	Lottia gigantea	97.4	96.7	0.7	0.3	2.3
41	Capitella teleta	97.3	92.7	4.6	1.7	1
42	Helobdella robusta	96.4	93.1	3.3	3	0.6
43	Capsaspora owczarzaki	94.7	94.7	0	1	4.3
44	Coprinopsis cinerea	96	95.7	0.3	3	1
45	Rhizopus oryzae	84.5	65	19.5	12.2	3.3
46	Schizosaccharomyces pombe	96.1	93.1	3	0.3	3.6
47	Homolaphlyctis polyrhiza	89.1	74.6	14.5	7.6	3.3
48	Yarrowia lipolytica	98.7	98	0.7	0.7	0.6
49	Dictyostelium discoideum	96.3	92.7	3.6	0.7	3
50	Acanthamoeba castellanii	64.4	60.4	4	6.9	28.7
51	Arabidopsis thaliana	99	54.1	44.9	0.7	0.3
52	Chlamydomonas reinhardtii	96	90.1	5.9	2.3	1.7
53	Chondrus crispus	75.9	73.3	2.6	7.9	16.2
54	Naegleria gruberi	83.1	80.5	2.6	5	11.9
55	Emiliania huxleyi	75.3	44.9	30.4	14.9	9.8
56	Guillardia theta	83.8	78.2	5.6	7.3	8.9
57	Tetrahymena thermophila	82.5	78.2	4.3	1.7	15.8
58	Bigelowiella natans	86.8	82.8	4	5.3	7.9
59	Thalassiosira pseudonana	81.2	77.9	3.3	7.9	10.9
