# Supplementary material for: Gene family innovation, conservation and loss on the animal stem lineage
Source: eLife journal article supplement (doi:10.7554/elife.34226), 2018-05-31
Supplement: supp [file elife-34226-supp-v1.zip › elife_poa_e34226_Supplementary_File_3.xlsx]

## Sheet: 3 Genomes for orthology
Internal ID	Species Name	Group	Sub-group (if any)	Genome Assembly Version (if any)	Data Source	Reference (DOI)
1	Diaphanoeca grandis	Choanoflagellates	Tectiform Loricates		This study
2	Acanthoeca spectabilis	Choanoflagellates	Nudiform Loricates		This study
3	Salpingoeca punica	Choanoflagellates	Clade 2 Craspedids		This study
4	Salpingoeca urceolata	Choanoflagellates	Clade 2 Craspedids		This study
5	Hartaetosiga gracilis	Choanoflagellates	Clade 1 Craspedids		This study
6	Salpingoeca macrocollata	Choanoflagellates	Clade 2 Craspedids		This study
7	Stephanoeca diplocostata France	Choanoflagellates	Tectiform Loricates		This study
8	Helgoeca nana	Choanoflagellates	Nudiform Loricates		This study
9	Salpingoeca kvevrii	Choanoflagellates	Clade 2 Craspedids		This study
10	Didymoeca costata	Choanoflagellates	Tectiform Loricates		This study
11	Choanoeca perplexa	Choanoflagellates	Clade 1 Craspedids		This study
12	Salpingoeca infusionum	Choanoflagellates	Clade 1 Craspedids		This study
13	Microstomoeca roanoka	Choanoflagellates	Clade 1 Craspedids		This study
14	Savillea parva	Choanoflagellates	Nudiform Loricates		This study
15	Hartaetosiga balthica	Choanoflagellates	Clade 1 Craspedids		This study
16	Salpingoeca dolichothecata	Choanoflagellates	Clade 3 Craspedids		This study
17	Codosiga hollandica	Choanoflagellates	Clade 2 Craspedids		This study
18	Salpingoeca helianthica	Choanoflagellates	Clade 2 Craspedids		This study
19	Mylnosiga fluctuans	Choanoflagellates	Clade 2 Craspedids		This study
20	Monosiga brevicollis	Choanoflagellates	Clade 1 Craspedids	1.0	ftp://ftp.jgi-psf.org/pub/JGI_data/Monosiga_brevicollis/annotation/v1.0/Monbr1_best_proteins.fasta.gz	10.1038/nature06617
21	Salpingoeca rosetta	Choanoflagellates	Clade 1 Craspedids	1	http://www.broadinstitute.org/annotation/genome/multicellularity_project/download/?sp=EAProteinsFasta&sp=SProterospongia_sp_ATCC50818&sp=S.zip	10.1186/gb-2013-14-2-r15
22	Oscarella pearsei	Animals	Porifera		http://www.compagen.org/datasets/OCAR_T-PEP_130911.zip	10.1371/journal.pone.0183002
23	Ephydatia muelleri	Animals	Porifera		http://www.compagen.org/datasets/EMUE_T-PEP_130911.zip	10.1186/s13227-016-0050-x
24	Amphimedon queenslandica	Animals	Porifera	1.0	ftp://ftp.jgi-psf.org/pub/JGI_data/Amphimedon_queenslandica/annotation/Aqu1.pep.fa.gz	10.1038/nature09201
25	Mnemiopsis leidyi	Animals	Ctenophora	2.2	http://research.nhgri.nih.gov/mnemiopsis/download/proteome/ML2.2.aa.gz	10.1126/science.1242592
26	Hydra vulgaris	Animals	Cnidaria	2.0	ftp://ftp.jgi-psf.org/pub/JGI_data/Hydra_magnipapillata/annotation/hydra_Hma2.pep.fa.gz	10.1038/nature08830
27	Nematostella vectensis	Animals	Cnidaria	1.0	ftp://ftp.jgi-psf.org/pub/JGI_data/Nematostella_vectensis/v1.0/annotation/proteins.Nemve1FilteredModels1.fasta.gz	10.1126/science.1139158
28	Acropora digitifera	Animals	Cnidaria	1.0.1	http://marinegenomics.oist.jp/genomes/download/adi_v1.0.1.prot.fa.gz	10.1038/nature10249
29	Trichoplax adhaerens	Animals	Placozoa	1.0	ftp://ftp.jgi-psf.org/pub/JGI_data/Trichoplax_adhaerens_Grell-BS-1999/annotation/v1.0/Triad1_best_proteins.fasta.gz	10.1038/nature07191
30	Ciona intestinalis	Animals	Deuterostomia	KH.68	ftp://ftp.ensembl.org/pub/release-68/fasta/ciona_intestinalis/pep/Ciona_intestinalis.KH.68.pep.all.fa.gz	10.1126/science.1080049
31	Gasterosteus aculeatus	Animals	Deuterostomia	BROADS1	ftp://ftp.ensembl.org/pub/release-68/fasta/gasterosteus_aculeatus/pep/Gasterosteus_aculeatus.BROADS1.68.pep.all.fa.gz	10.1038/nature10944
32	Mus musculus	Animals	Deuterostomia	38.1	ftp://ftp.ncbi.nih.gov/genomes/M_musculus/protein/protein.fa.gz	10.1038/nature01262
33	Branchiostoma floridae	Animals	Deuterostomia	1.0	ftp://ftp.jgi-psf.org/pub/JGI_data/Branchiostoma_floridae/v1.0/proteins.Brafl1.fasta.gz	10.1038/nature06967
34	Strongylocentrotus purpuratus	Animals	Deuterostomia	3.1	ftp://ftp.ncbi.nih.gov/genomes/Strongylocentrotus_purpuratus/protein/protein.fa.gz	10.1126/science.1133609
35	Caenorhabditis elegans	Animals	Ecdysozoa	WS233	ftp://ftp.wormbase.org/pub/wormbase/releases/WS233/species/c_elegans/c_elegans.WS233.protein.fa.gz	10.1126/science.282.5396.2012
36	Pristionchus pacificus	Animals	Ecdysozoa	WS233	ftp://ftp.wormbase.org/pub/wormbase/releases/WS233/species/p_pacificus/p_pacificus.WS233.protein.fa.gz	10.1038/ng.227
37	Daphnia pulex	Animals	Ecdysozoa	1.0	ftp://ftp.jgi-psf.org/pub/JGI_data/Daphnia_pulex/v1.0/FrozenGeneCatalog_2007_07_03.aa.fasta.gz	10.1126/science.1197761
38	Drosophila melanogaster	Animals	Ecdysozoa	5.47	ftp://ftp.flybase.net/genomes/Drosophila_melanogaster/dmel_r5.47_FB2012_05/fasta/dmel-all-translation-r5.47.fasta.gz	10.1126/science.287.5461.2185
39	Tetranychus urticae	Animals	Ecdysozoa	20130708	https://bioinformatics.psb.ugent.be/gdb/tetranychus/Tetur__pep_20130708.tfa.gz	10.1038/nature10640
40	Lottia gigantea	Animals	Lophotrochozoa	1.0	ftp://ftp.jgi-psf.org/pub/JGI_data/Lottia_gigantea/v1.0/Lotgi1_GeneModels_FilteredModels1_aa.fasta.gz	10.1038/nature11696
41	Capitella teleta	Animals	Lophotrochozoa	1.0	ftp://ftp.jgi-psf.org/pub/JGI_data/Capitella/v1.0/FilteredModelsv1.0.aa.fasta.gz	10.1038/nature11696
42	Helobdella robusta	Animals	Lophotrochozoa	1.0	ftp://ftp.jgi-psf.org/pub/JGI_data/Helobdella_robusta/v1.0/proteins.Helro1_FilteredModels3.fasta.gz	10.1038/nature11696
43	Capsaspora owczarzaki	Filasterea		2	http://www.broadinstitute.org/annotation/genome/multicellularity_project/download/?sp=EAProteinsFasta&sp=SC_owczarzaki_V2&sp=S.zip	10.1038/ncomms3325
44	Coprinopsis cinerea	Fungi	Basidiomycota	3	http://www.broadinstitute.org/annotation/genome/coprinus_cinereus/download/?sp=EAProteinsFasta&sp=SCC3&sp=S.zip	10.1073/pnas.1003391107
45	Rhizopus oryzae	Fungi	Zygomycota	3	http://www.broadinstitute.org/annotation/genome/rhizopus_oryzae/download/?sp=EAProteinsFasta&sp=SRO3&sp=S.zip	10.1371/journal.pgen.1000549
46	Schizosaccharomyces pombe	Fungi	Ascomycota	13.19	ftp://ftp.sanger.ac.uk/pub/yeast/pombe/Protein_data/pompep	10.1038/nature724
47	Homolaphlyctis polyrhiza	Fungi	Chytridiomycota	2010609	http://fungalgenomes.org/public/Hp_JEL142/pep/	10.1371/journal.ppat.1002338
48	Yarrowia lipolytica	Fungi	Ascomycota	3	http://www.genolevures.org/download/sequence/orf/Yali_ORF.aa	10.1093/nar/gkn859
49	Dictyostelium discoideum	Amoebozoa	Conosa	10-08-2012	http://dictybase.org/db/cgi-bin/dictyBase/download/download.pl?area=blast_databases&ID=dicty_primary_protein.gz	10.1038/nature03481
50	Acanthamoeba castellanii	Amoebozoa	Lobosa	2.0	http://amoebadb.org/common/downloads/release-2.0/AcastellaniiNeff/fasta/data/AmoebaDB-2.0_AcastellaniiNeff_AnnotatedProteins.fasta	10.1186/gb-2013-14-2-r11
51	Arabidopsis thaliana	Archaeplastida	Embryophyta	TAIR10	http://www.plantgdb.org/download/Download/xGDB/AtGDB/ATpepTAIR10	10.1038/35048692
52	Chlamydomonas reinhardtii	Archaeplastida	Chlorophyta	5.3	ftp://ftp.jgi-psf.org/pub/compgen/phytozome/v8.0/early_release/Creinhardtii_v5.3/annotation/Creinhardtii_v5.3_223_peptide.fa.gz	10.1126/science.1143609
53	Chondrus crispus	Archaeplastida	Rhodophyta	ASM35022v2	http://www.ncbi.nlm.nih.gov/bioproject/PRJEA78309	10.1073/pnas.1221259110
54	Naegleria gruberi	Excavata	Heterolobosea	1.0	ftp://ftp.jgi-psf.org/pub/JGI_data/Naegleria_gruberi/annotation/v1.0/Naegr1_best_proteins.fasta.gz	10.1016/j.cell.2010.01.032
55	Emiliania huxleyi	Haptophyta	Prymnesiophyta	1.0	ftp://ftp.jgi-psf.org/pub/JGI_data/Emiliania_huxleyi/annotation/v1.0/Emihu1_best_proteins.fasta.gz	10.1038/nature12221
56	Guillardia theta	Cryptophyta		1.0	http://genome.jgi.doe.gov/Guith1/download/Guith1_GeneCatalog_proteins_20101209.aa.fasta.gz	10.1038/nature11681
57	Tetrahymena thermophila	Alveolata	Ciliophora	oct2008	http://www.ciliate.org/system/downloads/tta1_oct2008_finalrelease.aa.fsa	10.1371/journal.pbio.0040286
58	Bigelowiella natans	Rhizaria	Cercozoa	1.0	http://genome.jgi.doe.gov/Bigna1/download/Bigna1_filtered_proteins.fasta.gz	10.1038/nature11681
59	Thalassiosira pseudonana	Stramenopiles	Bacillariophyhta	3.0	http://genome.jgi-psf.org/Thaps3/download/Thaps3_chromosomes_geneModels_FilteredModels2_aa.fasta.gz http://genome.jgi-psf.org/Thaps3/download/Thaps3_bd_unmapped_GeneModels_FilteredModels1_aa.fasta.gz	10.1126/science.1101156
