# Supplementary material for: Gene family innovation, conservation and loss on the animal stem lineage
Source: eLife journal article supplement (doi:10.7554/elife.34226), 2018-05-31
Supplement: supp [file elife-34226-supp-v1.zip › elife_poa_e34226_Supplementary_File_4.xlsx]

## Sheet: 4a Group presence absence
Group	Last Common Ancestor	Present in Last Common Ancestor	Gained in Last Common Ancestor
		If present in the following:	If present only within group and in ≥ 2 of the following sets of species:
Eukaryotes	Ureukaryote	(Outgroups AND any other group) OR (gained in Eukaryotes)	Excavata (Naegleria); Diaphoretickes (Chondrus, Guillardia, Chlamydomonas, Arabidopsis, Emiliania, Bigelowiella, Tetrahymena, Thalassiosira); Amoebozoa (Acanthamoeba, Dictyostelium)
Opisthokonts	Uropisthokont	(Fungi AND any other group) OR (Urholozoan AND any other group)	Fungi; Holozoa
Holozoa	Urholozoan	(Filasterea AND any other group) OR (Urchoanozoan AND any other group)	Filasterea; Choanozoa
Choanozoa	Urchoanozoan	(Animals AND any other group) OR (Choanoflagellates AND any other group) OR (Animals and Choanoflagellates)	Animals; Choanoflagellates
Choanoflagellates	Urchoanoflagellate	(Choanoflagellates AND any other group) OR (gained in Choanoflagellates)	Craspedids; Loricates
Animals	Urmetazoan	(Animals AND any other group) or (gained in Animals)	Sponges (Oscarella, Ephydatia, Amphimedon); Ctenophores (Mnemiopsis); Other animals (Trichoplax, Cnidaria, Bilateria)

## Sheet: 4b Group presence absence
Present	Gained	Outgroups	Fungi	Capsaspora	Choanoflagellates	Animals	Craspedids	Loricates	Sponges	Ctenophores	Other Animals	Excavata	Diaphoretickes	Amoebozoa
Animals	Animals	0	0	0	0	1			1	1	1
Animals	Animals	0	0	0	0	1			1	1	0
Animals	Animals	0	0	0	0	1			1	0	1
Animals	Animals	0	0	0	0	1			0	1	1
Choanoflagellates	Choanoflagellates	0	0	0	1	0	1	1
Choanozoa, Choanoflagellates, Animals	Choanozoa	0	0	0	1	1
Holozoa, Choanozoa, Animals	Holozoa	0	0	1	0	1
Holozoa, Choanozoa, Choanoflagellates	Holozoa	0	0	1	1	0
Holozoa, Choanozoa, Animals, Choanoflagellates	Holozoa	0	0	1	1	1
Opisthokonts, Holozoa, Choanozoa, Animals	Opisthokonts	0	1	0	0	1
Opisthokonts, Holozoa, Choanozoa, Choanoflagellates	Opisthokonts	0	1	0	1	0
Opisthokonts, Holozoa, Choanozoa, Choanoflagellates, Animals	Opisthokonts	0	1	0	1	1
Opisthokonts, Holozoa	Opisthokonts	0	1	1	0	0
Opisthokonts, Holozoa, Choanozoa, Animals	Opisthokonts	0	1	1	0	1
Opisthokonts, Holozoa, Choanozoa, Choanoflagellates	Opisthokonts	0	1	1	1	0
Opisthokonts, Holozoa, Choanozoa, Choanoflagellates, Animals	Opisthokonts	0	1	1	1	1
Eukaryotes	Eukaryotes	1	0	0	0	0						1	1	1
Eukaryotes	Eukaryotes	1	0	0	0	0						1	1	0
Eukaryotes	Eukaryotes	1	0	0	0	0						1	0	1
Eukaryotes	Eukaryotes	1	0	0	0	0						0	1	1
Eukaryotes, Opisthokonts, Holozoa, Choanozoa, Animals	Eukaryotes	1	0	0	0	1
Eukaryotes, Opisthokonts, Holozoa, Choanozoa, Choanoflagellates	Eukaryotes	1	0	0	1	0
Eukaryotes, Opisthokonts, Holozoa, Choanozoa, Choanoflagellates, Animals	Eukaryotes	1	0	0	1	1
Eukaryotes, Opisthokonts, Holozoa	Eukaryotes	1	0	1	0	0
Eukaryotes, Opisthokonts, Holozoa, Choanozoa, Animals	Eukaryotes	1	0	1	0	1
Eukaryotes, Opisthokonts, Holozoa, Choanozoa, Choanoflagellates	Eukaryotes	1	0	1	1	0
Eukaryotes, Opisthokonts, Holozoa, Choanozoa, Choanoflagellates, Animals	Eukaryotes	1	0	1	1	1
Eukaryotes, Opisthokonts	Eukaryotes	1	1	0	0	0
Eukaryotes, Opisthokonts, Holozoa, Choanozoa, Animals	Eukaryotes	1	1	0	0	1
Eukaryotes, Opisthokonts, Holozoa, Choanozoa, Choanoflagellates	Eukaryotes	1	1	0	1	0
Eukaryotes, Opisthokonts, Holozoa, Choanozoa, Choanoflagellates, Animals	Eukaryotes	1	1	0	1	1
Eukaryotes, Opisthokonts, Holozoa	Eukaryotes	1	1	1	0	0
Eukaryotes, Opisthokonts, Holozoa, Choanozoa, Animals	Eukaryotes	1	1	1	0	1
Eukaryotes, Opisthokonts, Holozoa, Choanozoa, Choanoflagellates	Eukaryotes	1	1	1	1	0
Eukaryotes, Opisthokonts, Holozoa, Choanozoa, Choanoflagellates, Animals	Eukaryotes	1	1	1	1	1
