# Supplementary material for: Gene family innovation, conservation and loss on the animal stem lineage
Source: eLife journal article supplement (doi:10.7554/elife.34226), 2018-05-31
Supplement: supp [file elife-34226-supp-v1.zip › elife_poa_e34226_Supplementary_File_5.xlsx]

## Sheet: 5 Gene family presence, gain, l
Last Common Ancestor of	Gene Families Present	Gene Families Gained on Stem Lineage	Gene Families Lost on Stem Lineage
Eukaryotes	6498	-	-
Opisthokonts	6663	634	469
Holozoans	7395	923	191
Choanozoans	8119	896	172
Choanoflagellates	9883	2463	699
Animals	8418	1944	1645
