# Supplementary material for: Gene family innovation, conservation and loss on the animal stem lineage
Source: eLife journal article supplement (doi:10.7554/elife.34226), 2018-05-31
Supplement: supp [file elife-34226-supp-v1.zip › elife_poa_e34226_Supplementary_File_6.xlsx]

## Sheet: 6 Gene family evidence criteria
	Evidence
	Strong (Conserved)	Moderate	Weak
Cadherins
Flamingo/CELSR	Cadherin, GPS, 7tm_2	GPS, 7tm_2 and any of [HRM, EGF, Laminin]	GPS, 7tm_2
Protocadherin domain	Protocadherin	-	Gene family 153 (M. musculus Protocadherin) or gene family 37483 (C. perplexa Protocadherin)
Integrins
ICAP-1 integrin binding	ICAP-1_inte_bdg	-	Gene family 6509 (animal and choanoflagellate ICAP-1) or gene family 10433 (choanoflagellate ICAP-1)
Integrin β domain	Integrin_beta	-	-
Notch
CSL/Su(H)	[LAG1-DNAbind, BTD] or [LAG1-DNAbind, BTD, TIG]	LAG1-DNAbind	-
Notch	EGF, Notch, transmembrane, Ank	[[EGF, Notch] or [Notch, Ank]], transmembrane	Notch, transmembrane
Delta/Serrate/Jagged	MNNL, DSL	[DSL, transmembrane] or [DSL, [EGF or EGF_CA]]	DSL, no MNNL, no EGF, no transmembrane
Transcription factors
Homeobox	Homeobox or Homeobox_KN	-	-
Churchill	Churchill	-	-
Runx (Runt)	Runt	-	-
RNAi
Argonaute	DUF1785, Paz, Piwi	Paz, Piwi	-
Dicer	Dicer_dimer, PAZ, Ribonuclease_3	Dicer_dimer	Gene family 1349 (Dicer)
Innate immunity
Toll-like receptor*	LRR, transmembrane, TIR	[[transmembrane, TIR] or [LRR, transmembrane]] and gene family 654, 1172, 3904, 4726, 6845, 7022, 19517, 23864, 23872, 27043, 27051, 28483, 28491, 31779, 31843, 33402, 33488, 37082, 38154, 40919, 42784, 51771, 54342, 70332, 76270, 78827, 83307, 107096 (LRR, transmembrane, TIR-containing proteins)	[transmembrane, TIR] or [LRR, transmembrane]
Kinase Toll-like receptor	LRR, transmembrane, [Pkinase or Pkinase_Tyr], TIR	LRR, transmembrane, [Pkinase or Pkinase_Tyr]	transmembrane, [Pkinase or Pkinase_Tyr], TIR
SARM1	[Arm, SAM, TIR] or [SAM, TIR]	Gene family 6840 (SARM1)	[TIR, SAM] or [SAM, TIR, TIR]
MyD88	[Death, TIR] or [TIR and gene family 9784 (animal MyD88-like)]	Gene family 9784 (animal MyD88-like)	TIR and gene family 7752 (animal Death/TIR-containing proteins)
Kinase TIR	[Pkinase or Pkinase_Tyr or PfkB], TIR; additional domains allowed except LRR; no transmembrane	Any domain (excluding SAM, Death, Pkinase, Pkinase_Tyr, PfkB, LRR), TIR; no transmembrane	TIR; no LRR or transmembrane
Death kinase	[Pkinase or Pkinase_Tyr], Death	Pkinase and gene family 38105 (sponge Death, Pkinase-containing proteins)	Pkinase and no transmembrane and gene family 5864 or 15924 or 31451 (animal Death, Pkinase-containing proteins)
NF-κB**	RHD	-	Gene family 8586 (choanoflagellate RHD-containing proteins)
