# Supplementary material for: Gene family innovation, conservation and loss on the animal stem lineage
Source: eLife journal article supplement (doi:10.7554/elife.34226), 2018-05-31
Supplement: supp [file elife-34226-supp-v1.zip › elife_poa_e34226_Supplementary_File_7.xlsx]

## Sheet: 7 Core choano-specific
Gene Family ID	Gene Family Size	Panther	Pfam	Pfam Kinase / Phosphatase / SH2 / SH3	Transmembrane	Signal Peptide	GO Molecular Function	GO Cellular Component	GO Biological Process
807	88	0.42 VON WILENBRAND FACTOR RELATED#PTHR22992;0.07 CABRIOLET.-RELATED#PTHR23275;0.05 SUBFAMILY NOT NAMED#PTHR23097:SF42;0.05 FAMILY NOT NAMED#PTHR22727;0.05 SUBFAMILY NOT NAMED#PTHR22992:SF74;0.03 FAMILY NOT NAMED#PTHR24027;0.02 SUBFAMILY NOT NAMED#PTHR23275:SF7;0.02 TUMOR NECROSIS FACTOR RECEPTOR SUPERFAMILY MEMBER#PTHR23097;0.02 LYSYL OXIDASE-RELATED#PTHR19331;0.01 SUBFAMILY NOT NAMED#PTHR24033:…	0.58 VWA;0.38 HH_signal;0.32 Cadherin;0.27 TNFR_c6;0.09 SH2;0.09 EGF;0.08 GCC2_GCC3;0.07 GPI-anchored;0.06 Cupin_4;0.06 Big_3_2;0.03 HYR;0.02 SRCR;0.02 PT;0.02 LRR_5;0.01 Ig_2;0.01 I-set;0.01 Cohesin;0.01 Pkinase_Tyr;0.01 EGF_CA;0.01 Collagen	0.09	0.52 Transmembrane	0.48 Signal Peptide	0.11 receptor activity#GO:0004872;0.07 tumor necrosis factor receptor activity#GO:0005031;0.07 hematopoietin/interferon-class (D200-domain) cytokine receptor activity#GO:0004896;0.06 binding#GO:0005488;0.03 catalytic activity#GO:0003824;0.02 oxidoreductase activity#GO:0016491;0.02 peptidase activity#GO:0008233;0.02 hydrolase activity#GO:0016787;0.02 serine-type peptidase activity#GO:0008236;0.01 …	0.47 extracellular region#GO:0005576;0.47 extracellular matrix#GO:0031012	0.62 cellular process#GO:0009987;0.58 signal transduction#GO:0007165;0.58 cell communication#GO:0007154;0.57 immune system process#GO:0002376;0.53 response to stimulus#GO:0050896;0.53 system process#GO:0003008;0.51 sensory perception of sound#GO:0007605;0.50 cell-cell adhesion#GO:0016337;0.50 cell adhesion#GO:0007155;0.49 neurological system process#GO:0050877;0.47 response to external stimulus#G…
1575	72	0.75 TYROSINE-PROTEIN KINASE#PTHR24418;0.19 SUBFAMILY NOT NAMED#PTHR24418:SF162;0.03 TYROSINE-PROTEIN KINASE RECEPTOR#PTHR24416;0.01 TYROSINE-PROTEIN KINASE RECEPTOR#PTHR24416:SF220	0.99 Pkinase_Tyr;0.90 PID	0.99	0.08 Transmembrane	0.04 Signal Peptide	0.99 transferase activity#GO:0016740;0.99 catalytic activity#GO:0003824;0.99 kinase activity#GO:0016301;0.99 protein kinase activity#GO:0004672;0.94 non-membrane spanning protein tyrosine kinase activity#GO:0004715;0.04 transmembrane receptor protein tyrosine kinase activity#GO:0004714;0.04 receptor activity#GO:0004872;0.04 transmembrane receptor protein kinase activity#GO:0019199	0.19 cytoplasm#GO:0005737;0.19 nucleus#GO:0005634	0.99 cell communication#GO:0007154;0.99 protein amino acid phosphorylation#GO:0006468;0.94 cell-cell signaling#GO:0007267;0.24 protein metabolic process#GO:0019538;0.24 signal transduction#GO:0007165;0.24 primary metabolic process#GO:0044238;0.24 metabolic process#GO:0008152;0.24 protein modification process#GO:0006464;0.19 intracellular signaling cascade#GO:0007242;0.04 cell surface receptor lin…
4910	47	0.79 FAMILY NOT NAMED#PTHR11915	0.85 CH;0.36 Spectrin;0.28 EF-hand_6;0.09 EF-hand_7;0.06 EFhand_Ca_insen;0.04 EF-hand_5;0.02 EF-hand_1	0		0.04 Signal Peptide	0.79 actin binding#GO:0003779;0.79 cytoskeletal protein binding#GO:0008092;0.79 structural constituent of cytoskeleton#GO:0005200;0.79 binding#GO:0005488;0.79 protein binding#GO:0005515;0.79 structural molecule activity#GO:0005198	0.79 actin cytoskeleton#GO:0015629;0.79 cytoskeleton#GO:0005856;0.79 intracellular#GO:0005622	0.79 cell motility#GO:0006928;0.79 cellular structure morphogenesis#GO:0032989;0.79 cellular component organization and biogenesis#GO:0016043;0.79 anatomical structure morphogenesis#GO:0009653;0.79 developmental process#GO:0032502;0.79 cellular process#GO:0009987
5120	46	0.72 KELCH REPEAT DOMAIN#PTHR23244	0.65 Kelch_3;0.59 Kelch_4;0.11 Kelch_5;0.04 Kelch_1;0.02 CUB;0.02 Kelch_2;0.02 hEGF	0	0.70 Transmembrane	0.72 Signal Peptide
5238	45	0.98 N-ACETYLGALACTOSAMINYLTRANSFERASE#PTHR11675;0.02 SUBFAMILY NOT NAMED#PTHR11675:SF0	1.00 Glycos_transf_2;0.87 Ricin_B_lectin;0.20 Glyco_transf_7C;0.07 GlcNAc	0	0.33 Transmembrane	0.44 Signal Peptide	0.02 transferase activity#GO:0016740;0.02 transferase activity, transferring glycosyl groups#GO:0016757;0.02 catalytic activity#GO:0003824		0.02 primary metabolic process#GO:0044238;0.02 protein metabolic process#GO:0019538;0.02 protein modification process#GO:0006464;0.02 protein amino acid glycosylation#GO:0006486;0.02 carbohydrate metabolic process#GO:0005975;0.02 metabolic process#GO:0008152;0.02 polysaccharide metabolic process#GO:0005976
5543	42	0.62 FORMIN-RELATED#PTHR23213;0.07 SUBFAMILY NOT NAMED#PTHR12305:SF31;0.05 PTEN 3-PHOSPHOINOSITIDE PHOSPHATASE ALPHA (PROTEIN TYROSINE PHOSPHATASE)#PTHR12305:SF19;0.05 PHOSPHATASE WITH HOMOLOGY TO TENSIN#PTHR12305;0.02 SUBFAMILY NOT NAMED#PTHR12305:SF32;0.02 PUTATIVE UNCHARACTERIZED PROTEIN#PTHR23213:SF77	0.67 FH2;0.24 DSPc;0.12 PTEN_C2;0.02 Y_phosphatase3	0.24	0.05 Transmembrane	0.02 Signal Peptide	0.64 protein binding#GO:0005515;0.64 structural molecule activity#GO:0005198;0.64 binding#GO:0005488;0.64 structural constituent of cytoskeleton#GO:0005200;0.64 cytoskeletal protein binding#GO:0008092;0.64 actin binding#GO:0003779;0.19 phosphoprotein phosphatase activity#GO:0004721;0.19 hydrolase activity#GO:0016787;0.19 catalytic activity#GO:0003824;0.19 phosphoric monoester hydrolase activity#G…	0.64 cytoskeleton#GO:0005856;0.64 intracellular#GO:0005622;0.64 actin cytoskeleton#GO:0015629	0.83 cellular process#GO:0009987;0.64 cell motility#GO:0006928;0.19 immune system process#GO:0002376;0.19 cell communication#GO:0007154;0.19 lipid metabolic process#GO:0006629;0.19 cell cycle#GO:0007049;0.19 metabolic process#GO:0008152;0.19 apoptosis#GO:0006915;0.19 cell adhesion#GO:0007155;0.19 protein metabolic process#GO:0019538;0.19 protein amino acid phosphorylation#GO:0006468;0.19 phosphol…
5754	41	1.00 N-ACETYLGALACTOSAMINYLTRANSFERASE#PTHR11675	1.00 Glycos_transf_2;0.88 Ricin_B_lectin;0.44 Glyco_transf_7C	0	0.49 Transmembrane	0.34 Signal Peptide
5791	41	0.95 SUBFAMILY NOT NAMED#PTHR11360:SF62	0.85 MFS_1	0	0.85 Transmembrane	0.02 Signal Peptide	0.95 transmembrane transporter activity#GO:0022857;0.95 transporter activity#GO:0005215		0.95 cation transport#GO:0006812;0.95 ion transport#GO:0006811;0.95 transport#GO:0006810
6394	36	0.58 H/ACA RIBONUCLEOPROTEIN COMPLEX NON-CORE SUBUNIT NAF1 (HNAF1) SOURCE:UNIPROTKB/#PTHR23213:SF30;0.22 FORMIN-RELATED#PTHR23213;0.08 SUBFAMILY NOT NAMED#PTHR23213:SF39;0.03 FORMIN-LIKE#PTHR23213:SF24;0.03 SUBFAMILY NOT NAMED#PTHR23213:SF115;0.03 FORMIN-LIKE#PTHR23213:SF26;0.03 FORMIN-LIKE 3#PTHR23213:SF29	0.75 Drf_GBD;0.69 Drf_FH3;0.64 FH2;0.03 Mito_fiss_reg	0	0.08 Transmembrane	0.06 Signal Peptide	1.00 protein binding#GO:0005515;1.00 binding#GO:0005488;1.00 structural molecule activity#GO:0005198;1.00 actin binding#GO:0003779;1.00 structural constituent of cytoskeleton#GO:0005200;1.00 cytoskeletal protein binding#GO:0008092	1.00 actin cytoskeleton#GO:0015629;1.00 intracellular#GO:0005622;1.00 cytoskeleton#GO:0005856	1.00 cell motility#GO:0006928;1.00 cellular process#GO:0009987
6702	34	0.47 PROTEIN-TYROSINE PHOSPHATASE#PTHR19134;0.18 NUDIX HYDROLASE#PTHR13030;0.12 NEUROFIBROMIN#PTHR10194:SF7;0.06 RAC GTPASE ACTIVATING PROTEIN#PTHR23174;0.03 OLIGOPHRENIN 1#PTHR12552;0.03 SUBFAMILY NOT NAMED#PTHR22870:SF116;0.03 RAS GTPASE ACTIVATION DOMAIN-CONTAINING PROTEIN#PTHR10194:SF59;0.03 SUBFAMILY NOT NAMED#PTHR23174:SF3;0.03 INHIBITORY REGULATOR PROTEIN IRA1#PTHR10194:SF23	0.65 RhoGAP;0.65 RasGAP;0.59 Y_phosphatase;0.24 SH2;0.03 PH;0.03 RCC1;0.03 RhoGEF	0.59	0.06 Transmembrane		0.65 hydrolase activity#GO:0016787;0.65 catalytic activity#GO:0003824;0.47 hydrolase activity, acting on ester bonds#GO:0016788;0.47 phosphoprotein phosphatase activity#GO:0004721;0.47 phosphoric monoester hydrolase activity#GO:0016791;0.24 binding#GO:0005488;0.24 small GTPase regulator activity#GO:0005083;0.24 protein binding#GO:0005515;0.24 enzyme regulator activity#GO:0030234;0.18 receptor bin…	0.47 cytoplasm#GO:0005737	0.50 metabolic process#GO:0008152;0.50 primary metabolic process#GO:0044238;0.47 protein metabolic process#GO:0019538;0.47 protein modification process#GO:0006464;0.26 cellular process#GO:0009987;0.24 cell communication#GO:0007154;0.24 signal transduction#GO:0007165;0.03 nucleobase, nucleoside, nucleotide and nucleic acid metabolic process#GO:0006139;0.03 nucleobase, nucleoside, nucleotide and nu…
6715	34	0.65 SORTILIN-RELATED RECEPTOR#PTHR12106:SF7;0.32 SORTILIN RELATED#PTHR12106	0.94 PA;0.03 BNR	0	0.88 Transmembrane	0.71 Signal Peptide	0.65 transporter activity#GO:0005215;0.65 lipid binding#GO:0008289;0.65 receptor activity#GO:0004872;0.65 transmembrane transporter activity#GO:0022857;0.65 binding#GO:0005488		0.65 metabolic process#GO:0008152;0.65 transport#GO:0006810;0.65 primary metabolic process#GO:0044238;0.65 lipid transport#GO:0006869;0.65 vesicle-mediated transport#GO:0016192;0.65 protein transport#GO:0015031;0.65 endocytosis#GO:0006897;0.65 lipid metabolic process#GO:0006629;0.65 intracellular protein transport#GO:0006886;0.65 receptor-mediated endocytosis#GO:0006898
6857	33	0.58 SUBFAMILY NOT NAMED#PTHR10605:SF3	0.42 Sulfotransfer_1;0.12 Sulfotransfer_3	0	0.18 Transmembrane	0.21 Signal Peptide	0.58 catalytic activity#GO:0003824;0.58 transferase activity#GO:0016740		0.58 primary metabolic process#GO:0044238;0.58 carbohydrate metabolic process#GO:0005975;0.58 metabolic process#GO:0008152;0.58 polysaccharide metabolic process#GO:0005976;0.58 cellular process#GO:0009987;0.58 protein modification process#GO:0006464;0.58 protein metabolic process#GO:0019538;0.58 immune system process#GO:0002376;0.58 cell communication#GO:0007154;0.58 sulfur metabolic process#GO:0…
6909	33	0.73 SUBFAMILY NOT NAMED#PTHR24418:SF162;0.21 TYROSINE-PROTEIN KINASE#PTHR24418	0.97 PID;0.94 Pkinase_Tyr;0.15 SAM_2;0.06 SAM_1;0.03 TFIIA	0.97		0.06 Signal Peptide	0.94 kinase activity#GO:0016301;0.94 catalytic activity#GO:0003824;0.94 protein kinase activity#GO:0004672;0.94 non-membrane spanning protein tyrosine kinase activity#GO:0004715;0.94 transferase activity#GO:0016740	0.73 nucleus#GO:0005634;0.73 cytoplasm#GO:0005737	0.94 cell-cell signaling#GO:0007267;0.94 cell communication#GO:0007154;0.94 protein amino acid phosphorylation#GO:0006468;0.73 primary metabolic process#GO:0044238;0.73 protein modification process#GO:0006464;0.73 metabolic process#GO:0008152;0.73 protein metabolic process#GO:0019538;0.73 intracellular signaling cascade#GO:0007242;0.73 signal transduction#GO:0007165
7009	32		0.03 Reg_prop;0.03 F-box-like	0		0.06 Signal Peptide
7010	32	0.88 HYPOXIA-INDUCIBLE FACTOR 1 ALPHA INHIBITOR#PTHR12461:SF1;0.03 SUBFAMILY NOT NAMED#PTHR12461:SF17	0.88 Cupin_8;0.28 Sulfotransfer_3	0	0.56 Transmembrane	0.31 Signal Peptide	0.91 catalytic activity#GO:0003824;0.91 oxidoreductase activity#GO:0016491		0.91 primary metabolic process#GO:0044238;0.91 regulation of transcription from RNA polymerase II promoter#GO:0006357;0.91 protein modification process#GO:0006464;0.91 metabolic process#GO:0008152;0.91 protein metabolic process#GO:0019538;0.91 transcription from RNA polymerase II promoter#GO:0006366;0.91 nucleobase, nucleoside, nucleotide and nucleic acid metabolic process#GO:0006139;0.91 transcr…
7200	31	0.10 UNCHARACTERIZED#PTHR12277	0.55 DUF818;0.19 Abhydrolase_6;0.13 Abhydrolase_5	0	0.68 Transmembrane	0.10 Signal Peptide
7230	31	1.00 TYROSINE-PROTEIN KINASE RECEPTOR#PTHR24416	1.00 Pkinase_Tyr;0.55 CH;0.10 Ank_4;0.03 Ank_2;0.03 Ank	1		0.06 Signal Peptide	1.00 catalytic activity#GO:0003824;1.00 kinase activity#GO:0016301;1.00 receptor activity#GO:0004872;1.00 transmembrane receptor protein tyrosine kinase activity#GO:0004714;1.00 transferase activity#GO:0016740;1.00 protein kinase activity#GO:0004672;1.00 transmembrane receptor protein kinase activity#GO:0019199		1.00 cellular process#GO:0009987;1.00 protein modification process#GO:0006464;1.00 metabolic process#GO:0008152;1.00 transmembrane receptor protein tyrosine kinase signaling pathway#GO:0007169;1.00 primary metabolic process#GO:0044238;1.00 signal transduction#GO:0007165;1.00 protein amino acid phosphorylation#GO:0006468;1.00 cell surface receptor linked signal transduction#GO:0007166;1.00 protein…
7251	31	0.26 PHOSPHATIDYLSERINE RECEPTOR#PTHR12480;0.10 ANKYRIN REPEAT AND PROTEIN KINASE DOMAIN-CONTAINING PROTEIN#PTHR24198;0.03 ANKYRIN REPEAT PROTEIN#PTHR24193;0.03 SUBFAMILY NOT NAMED#PTHR24198:SF4	0.77 Ank_2;0.65 Cupin_8;0.03 TPR_16;0.03 TPR_2;0.03 Ank	0	0.45 Transmembrane	0.16 Signal Peptide	0.26 receptor activity#GO:0004872;0.03 nucleic acid binding#GO:0003676;0.03 DNA binding#GO:0003677;0.03 protein kinase activity#GO:0004672;0.03 binding#GO:0005488;0.03 kinase activity#GO:0016301;0.03 catalytic activity#GO:0003824;0.03 transcription regulator activity#GO:0030528;0.03 transferase activity#GO:0016740;0.03 transcription factor activity#GO:0003700		0.03 metabolic process#GO:0008152;0.03 protein amino acid phosphorylation#GO:0006468;0.03 protein modification process#GO:0006464;0.03 protein metabolic process#GO:0019538;0.03 primary metabolic process#GO:0044238
7644	29	1.00 PROTEIN-TYROSINE PHOSPHATASE#PTHR19134	1.00 Y_phosphatase;0.34 EF-hand_5;0.31 WW;0.10 SH2;0.10 EF-hand_6;0.07 EF-hand_8;0.03 EF-hand_1	1	0.03 Transmembrane		1.00 phosphoric monoester hydrolase activity#GO:0016791;1.00 catalytic activity#GO:0003824;1.00 hydrolase activity, acting on ester bonds#GO:0016788;1.00 phosphoprotein phosphatase activity#GO:0004721;1.00 hydrolase activity#GO:0016787	1.00 cytoplasm#GO:0005737	1.00 protein metabolic process#GO:0019538;1.00 primary metabolic process#GO:0044238;1.00 metabolic process#GO:0008152;1.00 protein modification process#GO:0006464
7662	29	0.76 SUBFAMILY NOT NAMED#PTHR10661:SF97	0.76 SH3_9;0.07 SH3_1	0.76	0.03 Transmembrane	0.10 Signal Peptide	0.76 structural constituent of cytoskeleton#GO:0005200;0.76 structural molecule activity#GO:0005198	0.76 actin cytoskeleton#GO:0015629;0.76 intracellular#GO:0005622;0.76 cytoskeleton#GO:0005856	0.76 cell communication#GO:0007154;0.76 cell-cell signaling#GO:0007267;0.76 cellular component organization and biogenesis#GO:0016043;0.76 anatomical structure morphogenesis#GO:0009653;0.76 developmental process#GO:0032502;0.76 neurological system process#GO:0050877;0.76 primary metabolic process#GO:0044238;0.76 system process#GO:0003008;0.76 cellular structure morphogenesis#GO:0032989;0.76 trans…
7823	28			0
7873	28	0.18 RETICULOCALBIN#PTHR10827	0.57 EF-hand_5;0.29 EF-hand_7;0.25 EF-hand_8;0.07 SPARC_Ca_bdg;0.07 EF-hand_6	0	0.18 Transmembrane	0.36 Signal Peptide
8047	27		0.19 PP2C_2	0.19
8053	27	0.04 SUBFAMILY NOT NAMED#PTHR10661:SF95	0.89 FCH;0.78 SH3_9;0.52 PDZ;0.11 SH3_1	0.78	0.04 Transmembrane		0.04 structural constituent of cytoskeleton#GO:0005200;0.04 structural molecule activity#GO:0005198	0.04 cytoskeleton#GO:0005856;0.04 intracellular#GO:0005622;0.04 actin cytoskeleton#GO:0015629	0.04 anatomical structure morphogenesis#GO:0009653;0.04 developmental process#GO:0032502;0.04 neurological system process#GO:0050877;0.04 cell-cell signaling#GO:0007267;0.04 cell communication#GO:0007154;0.04 cellular component organization and biogenesis#GO:0016043;0.04 carbohydrate metabolic process#GO:0005975;0.04 transport#GO:0006810;0.04 metabolic process#GO:0008152;0.04 carbohydrate transpo…
8062	27	0.22 ASPARTYL/ASPARAGINYL BETA-HYDROXYLASE#PTHR12366	0.81 Asp_Arg_Hydrox	0	0.37 Transmembrane	0.07 Signal Peptide	0.22 catalytic activity#GO:0003824;0.22 oxidoreductase activity#GO:0016491		0.22 protein modification process#GO:0006464;0.22 metabolic process#GO:0008152;0.22 protein metabolic process#GO:0019538;0.22 primary metabolic process#GO:0044238
8065	27	0.81 GLUTATHIONE PEROXIDASE#PTHR11592	0.96 GSHPx;0.85 DEP;0.04 PH	0	0.04 Transmembrane		0.81 antioxidant activity#GO:0016209;0.81 catalytic activity#GO:0003824;0.81 oxidoreductase activity#GO:0016491;0.81 peroxidase activity#GO:0004601		0.81 lipid metabolic process#GO:0006629;0.81 response to stimulus#GO:0050896;0.81 immune system process#GO:0002376;0.81 response to toxin#GO:0009636;0.81 oxygen and reactive oxygen species metabolic process#GO:0006800;0.81 primary metabolic process#GO:0044238;0.81 steroid metabolic process#GO:0008202;0.81 metabolic process#GO:0008152;0.81 response to stress#GO:0006950
8086	27			0
8134	27	0.04 MULTIPLE PDZ DOMAIN PROTEIN#PTHR19964	0.89 PDZ;0.85 WW;0.44 RA	0	0.11 Transmembrane		0.04 structural molecule activity#GO:0005198;0.04 structural constituent of cytoskeleton#GO:0005200	0.04 plasma membrane#GO:0005886;0.04 intracellular#GO:0005622;0.04 cytoskeleton#GO:0005856;0.04 cell junction#GO:0030054
8137	27	0.11 FYVE-FINGER-CONTAINING RAB5 EFFECTOR PROTEIN RABENOSYN-5-RELATED#PTHR13510;0.04 SUBFAMILY NOT NAMED#PTHR13510:SF12	0.74 PH;0.74 FYVE	0		0.07 Signal Peptide			0.15 metabolic process#GO:0008152;0.15 primary metabolic process#GO:0044238;0.15 protein metabolic process#GO:0019538
8289	26	0.69 SUBFAMILY NOT NAMED#PTHR12443:SF9;0.15 FAMILY NOT NAMED#PTHR12443	0.92 Sec62;0.12 DEP;0.04 DUF2146	0	0.88 Transmembrane	0.04 Signal Peptide
8297	26	0.04 SUBFAMILY NOT NAMED#PTHR17901:SF1	0.04 Acid_PPase	0
8300	26	0.73 FAMILY NOT NAMED#PTHR24115;0.12 SUBFAMILY NOT NAMED#PTHR24115:SF105;0.04 RIBOSOME BIOGENESIS PROTEIN BMS1#PTHR12858:SF2	0.92 Kinesin;0.04 DUF663	0		0.04 Signal Peptide	0.85 motor activity#GO:0003774;0.85 structural molecule activity#GO:0005198;0.85 microtubule motor activity#GO:0003777;0.85 structural constituent of cytoskeleton#GO:0005200	0.85 microtubule#GO:0005874;0.85 intracellular#GO:0005622;0.85 cytoskeleton#GO:0005856	0.85 cell cycle#GO:0007049;0.85 cellular component organization and biogenesis#GO:0016043;0.85 meiosis#GO:0007126;0.85 protein transport#GO:0015031;0.85 vesicle-mediated transport#GO:0016192;0.85 anatomical structure morphogenesis#GO:0009653;0.85 cellular process#GO:0009987;0.85 transport#GO:0006810;0.85 intracellular protein transport#GO:0006886;0.85 developmental process#GO:0032502;0.85 cellula…
8304	26	0.88 IMMUNOGLOBULIN-BINDING PROTEIN 1#PTHR10933	1.00 TAP42	0		0.04 Signal Peptide			0.88 immune system process#GO:0002376;0.88 cell communication#GO:0007154;0.88 signal transduction#GO:0007165;0.88 cellular process#GO:0009987
8351	26	0.50 AAA FAMILY ATPASE-LIKE PROTEIN#PTHR23077:SF27;0.35 AAA-FAMILY ATPASE#PTHR23077;0.12 SPERMATOGENESIS ASSOCIATED FACTOR#PTHR23077:SF19;0.04 PEROXISOME ASSEMBLY FACTOR-2 (PEROXISOMAL-TYPE ATPASE 1)#PTHR23077:SF9	1.00 AAA	0	0.08 Transmembrane	0.08 Signal Peptide			0.65 protein transport#GO:0015031;0.65 vesicle-mediated transport#GO:0016192;0.65 intracellular protein transport#GO:0006886;0.65 protein metabolic process#GO:0019538;0.65 exocytosis#GO:0006887;0.65 transport#GO:0006810;0.65 metabolic process#GO:0008152;0.65 peroxisomal transport#GO:0043574;0.65 primary metabolic process#GO:0044238
8386	26	0.85 SUBFAMILY NOT NAMED#PTHR10887:SF284;0.04 SUBFAMILY NOT NAMED#PTHR10887:SF285	0.96 AAA_30;0.88 UvrD_C_2;0.50 HHH_4	0	0.12 Transmembrane	0.15 Signal Peptide	0.88 endoribonuclease activity#GO:0004521;0.88 hydrolase activity#GO:0016787;0.88 nuclease activity#GO:0004518;0.88 catalytic activity#GO:0003824;0.88 single-stranded DNA binding#GO:0003697;0.88 DNA helicase activity#GO:0003678;0.88 helicase activity#GO:0004386;0.88 RNA helicase activity#GO:0003724;0.88 binding#GO:0005488;0.88 hydrolase activity, acting on ester bonds#GO:0016788;0.88 DNA binding#…		0.88 cell cycle#GO:0007049;0.88 nucleobase, nucleoside, nucleotide and nucleic acid metabolic process#GO:0006139;0.88 tRNA metabolic process#GO:0006399;0.88 transcription#GO:0006350;0.88 RNA metabolic process#GO:0016070;0.88 cellular process#GO:0009987;0.88 DNA metabolic process#GO:0006259;0.88 nuclear mRNA splicing, via spliceosome#GO:0000398;0.88 metabolic process#GO:0008152;0.88 RNA catabolic …
8447	25	0.36 ANKYRIN REPEAT AND PROTEIN KINASE DOMAIN-CONTAINING PROTEIN#PTHR24198;0.24 SUBFAMILY NOT NAMED#PTHR24123:SF2;0.08 SUBFAMILY NOT NAMED#PTHR24158:SF0;0.08 FAMILY NOT NAMED#PTHR24158;0.04 SUBFAMILY NOT NAMED#PTHR24133:SF3	0.80 Ank_2;0.28 Ank;0.20 Ank_4;0.08 Ank_5	0		0.04 Signal Peptide	0.24 structural molecule activity#GO:0005198;0.24 structural constituent of cytoskeleton#GO:0005200	0.24 cytoskeleton#GO:0005856;0.24 intracellular#GO:0005622	0.24 cellular structure morphogenesis#GO:0032989;0.24 cellular component organization and biogenesis#GO:0016043;0.24 developmental process#GO:0032502;0.24 anatomical structure morphogenesis#GO:0009653;0.24 cellular process#GO:0009987
8553	25			0
8571	25		0.04 DUF3552;0.04 TATR	0	0.08 Transmembrane
8644	25	0.12 FACIOGENITAL DYSPLASIA PROTEIN#PTHR12673	1.00 PX;0.92 RhoGEF;0.32 SH3_9;0.16 SH3_2;0.12 SH3_1	0	0.08 Transmembrane	0.12 Signal Peptide	0.12 enzyme regulator activity#GO:0030234;0.12 small GTPase regulator activity#GO:0005083;0.12 binding#GO:0005488;0.12 protein binding#GO:0005515;0.12 guanyl-nucleotide exchange factor activity#GO:0005085		0.12 skeletal development#GO:0001501;0.12 mesoderm development#GO:0007498;0.12 system development#GO:0048731;0.12 developmental process#GO:0032502
8647	25		0.12 DOT1	0
8650	25	0.04 SRC SUBSTRATE CORTACTIN#PTHR10829:SF4;0.04 VACUOLAR PROTEIN SORTING-ASSOCIATED PROTEIN VPS9-RELATED#PTHR23101:SF24	1.00 PID;1.00 SH2;0.32 EF-hand_4;0.04 RasGAP;0.04 VPS9;0.04 SH3_9	1		0.04 Signal Peptide	0.08 binding#GO:0005488;0.08 protein binding#GO:0005515;0.04 structural molecule activity#GO:0005198;0.04 guanyl-nucleotide exchange factor activity#GO:0005085;0.04 small GTPase regulator activity#GO:0005083;0.04 cytoskeletal protein binding#GO:0008092;0.04 structural constituent of cytoskeleton#GO:0005200;0.04 actin binding#GO:0003779;0.04 enzyme regulator activity#GO:0030234	0.04 actin cytoskeleton#GO:0015629;0.04 cytoskeleton#GO:0005856;0.04 intracellular#GO:0005622	0.04 intracellular protein transport#GO:0006886;0.04 endocytosis#GO:0006897;0.04 cellular component organization and biogenesis#GO:0016043;0.04 anatomical structure morphogenesis#GO:0009653;0.04 vesicle-mediated transport#GO:0016192;0.04 developmental process#GO:0032502;0.04 protein transport#GO:0015031;0.04 cellular structure morphogenesis#GO:0032989;0.04 transport#GO:0006810;0.04 cellular proce…
8658	25		0.40 SH3_3	0.4		0.04 Signal Peptide
8813	24	0.83 PROTEIN PHOSPHATASE 2C#PTHR13832;0.12 SUBFAMILY NOT NAMED#PTHR13832:SF102	1.00 PP2C	1			0.96 hydrolase activity#GO:0016787;0.96 hydrolase activity, acting on ester bonds#GO:0016788;0.96 phosphoprotein phosphatase activity#GO:0004721;0.96 enzyme inhibitor activity#GO:0004857;0.96 catalytic activity#GO:0003824;0.96 phosphoric monoester hydrolase activity#GO:0016791		0.96 primary metabolic process#GO:0044238;0.96 MAPKKK cascade#GO:0000165;0.96 metabolic process#GO:0008152;0.96 protein modification process#GO:0006464;0.96 cellular process#GO:0009987;0.96 cell communication#GO:0007154;0.96 protein metabolic process#GO:0019538;0.96 intracellular signaling cascade#GO:0007242;0.96 protein amino acid phosphorylation#GO:0006468;0.96 signal transduction#GO:0007165
8818	24	0.46 TYROSINE-PROTEIN KINASE#PTHR24418;0.25 NUDIX HYDROLASE#PTHR13030;0.12 TYROSINE-PROTEIN KINASE RECEPTOR#PTHR24416;0.08 SUBFAMILY NOT NAMED#PTHR24418:SF162;0.04 SUBFAMILY NOT NAMED#PTHR24416:SF141;0.04 NUDIX HYDROLASE#PTHR13030:SF8	0.96 Pkinase_Tyr;0.96 PID;0.17 NUDIX;0.04 EF-hand_5;0.04 EF-hand_8;0.04 His_Phos_1	0.96	0.54 Transmembrane	0.08 Signal Peptide	1.00 catalytic activity#GO:0003824;0.71 protein kinase activity#GO:0004672;0.71 transferase activity#GO:0016740;0.71 kinase activity#GO:0016301;0.54 non-membrane spanning protein tyrosine kinase activity#GO:0004715;0.29 hydrolase activity#GO:0016787;0.17 receptor activity#GO:0004872;0.17 transmembrane receptor protein kinase activity#GO:0019199;0.17 transmembrane receptor protein tyrosine kinase …	0.08 nucleus#GO:0005634;0.08 cytoplasm#GO:0005737	0.71 cell communication#GO:0007154;0.71 protein amino acid phosphorylation#GO:0006468;0.54 cell-cell signaling#GO:0007267;0.25 protein metabolic process#GO:0019538;0.25 signal transduction#GO:0007165;0.25 primary metabolic process#GO:0044238;0.25 protein modification process#GO:0006464;0.25 metabolic process#GO:0008152;0.17 cell surface receptor linked signal transduction#GO:0007166;0.17 transmem…
8825	24		0.58 zf-C2H2_4;0.17 zf-C2H2;0.04 DNA_pol_A_exo1	0	0.04 Transmembrane
8827	24			0
8918	24	0.46 FAMILY NOT NAMED#PTHR23157	0.88 GRIP	0	0.04 Transmembrane	0.08 Signal Peptide
8932	24	0.54 CYTOCHROME C1 HEME LYASE#PTHR12743;0.42 SUBFAMILY NOT NAMED#PTHR12743:SF0	1.00 Cyto_heme_lyase	0		0.04 Signal Peptide	0.42 catalytic activity#GO:0003824;0.42 lyase activity#GO:0016829		0.42 protein modification process#GO:0006464;0.42 metabolic process#GO:0008152;0.42 coenzyme metabolic process#GO:0006732;0.42 primary metabolic process#GO:0044238;0.42 protein metabolic process#GO:0019538
8947	24	0.38 CATION-DEPENDENT MANNOSE-6-PHOSPHATE RECEPTOR#PTHR15071	0.83 Man-6-P_recep;0.62 CIMR	0	0.92 Transmembrane	0.71 Signal Peptide	0.38 receptor activity#GO:0004872		0.38 signal transduction#GO:0007165;0.38 cellular process#GO:0009987;0.38 cell communication#GO:0007154
8950	24		0.29 BNR	0	0.04 Transmembrane	0.12 Signal Peptide
8961	24	0.04 SUBFAMILY NOT NAMED#PTHR19818:SF65;0.04 ZINC FINGER PROTEIN#PTHR11389:SF310	0.29 RFX_DNA_binding;0.08 zf-H2C2_2;0.04 NUDE_C;0.04 zf-C2H2_4	0	0.08 Transmembrane	0.08 Signal Peptide	0.08 transcription factor activity#GO:0003700;0.08 binding#GO:0005488;0.08 nucleic acid binding#GO:0003676;0.08 DNA binding#GO:0003677;0.08 transcription regulator activity#GO:0030528		0.08 primary metabolic process#GO:0044238;0.08 transcription from RNA polymerase II promoter#GO:0006366;0.08 regulation of transcription from RNA polymerase II promoter#GO:0006357;0.08 metabolic process#GO:0008152;0.08 transcription#GO:0006350;0.08 nucleobase, nucleoside, nucleotide and nucleic acid metabolic process#GO:0006139
8976	24	0.54 SUBFAMILY NOT NAMED#PTHR24206:SF12;0.17 STRIATED MUSCLE ACTIVATOR OF RHO-DEPENDENT SIGNALING-RELATED#PTHR22739	1.00 Costars;0.96 LIM;0.04 eIF3_subunit	0			0.54 catalytic activity#GO:0003824;0.54 transcription regulator activity#GO:0030528;0.54 transcription factor activity#GO:0003700;0.54 hydrolase activity#GO:0016787;0.54 nuclease activity#GO:0004518;0.54 structural constituent of cytoskeleton#GO:0005200;0.54 DNA binding#GO:0003677;0.54 nucleic acid binding#GO:0003676;0.54 structural molecule activity#GO:0005198;0.54 binding#GO:0005488;0.54 hydrol…	0.54 cytoskeleton#GO:0005856;0.54 intracellular#GO:0005622;0.54 actin cytoskeleton#GO:0015629	0.54 cellular component organization and biogenesis#GO:0016043;0.54 cellular structure morphogenesis#GO:0032989;0.54 cell motility#GO:0006928;0.54 developmental process#GO:0032502;0.54 anatomical structure morphogenesis#GO:0009653;0.54 cellular process#GO:0009987
9101	23			0
9123	23	0.48 SUBFAMILY NOT NAMED#PTHR24418:SF162;0.48 TYROSINE-PROTEIN KINASE#PTHR24418;0.04 SUBFAMILY NOT NAMED#PTHR24416:SF141	1.00 Pkinase_Tyr;0.87 PID	1	0.13 Transmembrane		1.00 transferase activity#GO:0016740;1.00 catalytic activity#GO:0003824;1.00 kinase activity#GO:0016301;1.00 protein kinase activity#GO:0004672;0.96 non-membrane spanning protein tyrosine kinase activity#GO:0004715;0.04 transmembrane receptor protein tyrosine kinase activity#GO:0004714;0.04 transmembrane receptor protein kinase activity#GO:0019199;0.04 receptor activity#GO:0004872	0.48 cytoplasm#GO:0005737;0.48 nucleus#GO:0005634	1.00 cell communication#GO:0007154;1.00 protein amino acid phosphorylation#GO:0006468;0.96 cell-cell signaling#GO:0007267;0.52 primary metabolic process#GO:0044238;0.52 protein modification process#GO:0006464;0.52 metabolic process#GO:0008152;0.52 protein metabolic process#GO:0019538;0.52 signal transduction#GO:0007165;0.48 intracellular signaling cascade#GO:0007242;0.04 transmembrane receptor pr…
9197	23		0.78 MORN	0	0.04 Transmembrane
9238	23	0.48 SUBFAMILY NOT NAMED#PTHR19375:SF81;0.39 HEAT SHOCK PROTEIN 70KDA#PTHR19375;0.09 HEAT SHOCK PROTEIN 70 (HSP70)#PTHR19375:SF1	1.00 HSP70	0		0.09 Signal Peptide			0.96 metabolic process#GO:0008152;0.96 response to stress#GO:0006950;0.96 primary metabolic process#GO:0044238;0.96 protein folding#GO:0006457;0.96 protein complex assembly#GO:0006461;0.96 immune system process#GO:0002376;0.96 protein metabolic process#GO:0019538;0.96 response to stimulus#GO:0050896
9247	23		0.91 IQ;0.04 C2	0
9258	23			0
9287	23	0.52 STEROL REGULATORY ELEMENT-BINDING PROTEIN#PTHR12565:SF3;0.26 SUBFAMILY NOT NAMED#PTHR12565:SF46;0.09 STEROL REGULATORY ELEMENT-BINDING PROTEIN#PTHR12565;0.04 STEROL REGULATORY ELEMENT-BINDING PROTEIN 1, SRBP1#PTHR12565:SF5	0.91 HLH	0	0.78 Transmembrane	0.04 Signal Peptide	0.91 nucleic acid binding#GO:0003676;0.91 transcription regulator activity#GO:0030528;0.91 DNA binding#GO:0003677;0.91 transcription factor activity#GO:0003700;0.91 binding#GO:0005488		0.91 transcription from RNA polymerase II promoter#GO:0006366;0.91 primary metabolic process#GO:0044238;0.91 lipid metabolic process#GO:0006629;0.91 transcription#GO:0006350;0.91 metabolic process#GO:0008152;0.91 nucleobase, nucleoside, nucleotide and nucleic acid metabolic process#GO:0006139
9289	23	0.35 TYROSINE-PROTEIN KINASE#PTHR24418;0.04 TYROSINE-PROTEIN KINASE CSK#PTHR24418:SF52	0.91 SH2;0.52 CH	0.91	0.04 Transmembrane	0.09 Signal Peptide	0.39 kinase activity#GO:0016301;0.39 catalytic activity#GO:0003824;0.39 transferase activity#GO:0016740;0.39 non-membrane spanning protein tyrosine kinase activity#GO:0004715;0.39 protein kinase activity#GO:0004672	0.04 nucleus#GO:0005634;0.04 cytoplasm#GO:0005737	0.39 protein amino acid phosphorylation#GO:0006468;0.39 cell-cell signaling#GO:0007267;0.39 cell communication#GO:0007154;0.04 signal transduction#GO:0007165;0.04 protein metabolic process#GO:0019538;0.04 intracellular signaling cascade#GO:0007242;0.04 cell differentiation#GO:0030154;0.04 metabolic process#GO:0008152;0.04 cell proliferation#GO:0008283;0.04 protein modification process#GO:0006464;…
9435	22			0
9494	22			0
9539	22	0.68 TYROSINE-PROTEIN KINASE#PTHR24418;0.14 SUBFAMILY NOT NAMED#PTHR24418:SF162;0.09 SUBFAMILY NOT NAMED#PTHR24416:SF141;0.09 TYROSINE-PROTEIN KINASE RECEPTOR#PTHR24416	1.00 Pkinase_Tyr;0.95 PID	1	0.09 Transmembrane	0.05 Signal Peptide	1.00 protein kinase activity#GO:0004672;1.00 transferase activity#GO:0016740;1.00 kinase activity#GO:0016301;1.00 catalytic activity#GO:0003824;0.82 non-membrane spanning protein tyrosine kinase activity#GO:0004715;0.18 receptor activity#GO:0004872;0.18 transmembrane receptor protein kinase activity#GO:0019199;0.18 transmembrane receptor protein tyrosine kinase activity#GO:0004714	0.14 cytoplasm#GO:0005737;0.14 nucleus#GO:0005634	1.00 cell communication#GO:0007154;1.00 protein amino acid phosphorylation#GO:0006468;0.82 cell-cell signaling#GO:0007267;0.32 protein metabolic process#GO:0019538;0.32 signal transduction#GO:0007165;0.32 primary metabolic process#GO:0044238;0.32 metabolic process#GO:0008152;0.32 protein modification process#GO:0006464;0.18 cell surface receptor linked signal transduction#GO:0007166;0.18 transmem…
9554	22		0.82 SH3_2;0.77 SH3_1;0.68 SH3_9	0.82		0.05 Signal Peptide
9579	22	1.00 PROTEIN-TYROSINE PHOSPHATASE#PTHR19134	1.00 Y_phosphatase;0.59 SH3_9;0.18 SH2;0.18 SH3_2;0.14 SH3_1	1	0.18 Transmembrane	0.09 Signal Peptide	1.00 hydrolase activity, acting on ester bonds#GO:0016788;1.00 phosphoprotein phosphatase activity#GO:0004721;1.00 hydrolase activity#GO:0016787;1.00 catalytic activity#GO:0003824;1.00 phosphoric monoester hydrolase activity#GO:0016791	1.00 cytoplasm#GO:0005737	1.00 protein metabolic process#GO:0019538;1.00 primary metabolic process#GO:0044238;1.00 metabolic process#GO:0008152;1.00 protein modification process#GO:0006464
9582	22	0.55 WD-REPEAT PROTEIN INTERACTING WITH PHOSPHOINOSIDES (WIPI)-RELATED#PTHR11227;0.41 WIPI-3,4#PTHR11227:SF18;0.05 WIPI-1,2#PTHR11227:SF17	0.36 WD40	0					1.00 protein complex assembly#GO:0006461;1.00 metabolic process#GO:0008152;1.00 protein metabolic process#GO:0019538;1.00 primary metabolic process#GO:0044238
9599	22		0.50 Claudin_2;0.23 PMP22_Claudin	0	0.73 Transmembrane	0.05 Signal Peptide
9635	22	0.50 PHOSPHATIDYLINOSITOL-4-PHOSPHATE 5-KINASE RELATED#PTHR23084;0.27 UNCHARACTERIZED#PTHR23084:SF3;0.23 PUTATIVE UNCHARACTERIZED PROTEIN#PTHR23084:SF34	1.00 MORN	0	0.05 Transmembrane	0.05 Signal Peptide	1.00 transferase activity#GO:0016740;1.00 catalytic activity#GO:0003824;1.00 kinase activity#GO:0016301		1.00 cellular process#GO:0009987;1.00 G-protein coupled receptor protein signaling pathway#GO:0007186;1.00 signal transduction#GO:0007165;1.00 cell communication#GO:0007154;1.00 cell surface receptor linked signal transduction#GO:0007166
9647	22			0
10006	21	0.95 PROFILIN#PTHR11604	1.00 Profilin	0			0.95 structural molecule activity#GO:0005198;0.95 protein binding#GO:0005515;0.95 binding#GO:0005488;0.95 cytoskeletal protein binding#GO:0008092;0.95 structural constituent of cytoskeleton#GO:0005200;0.95 actin binding#GO:0003779	0.95 intracellular#GO:0005622;0.95 cytoskeleton#GO:0005856;0.95 actin cytoskeleton#GO:0015629	0.95 cellular process#GO:0009987;0.95 anatomical structure morphogenesis#GO:0009653;0.95 developmental process#GO:0032502;0.95 cellular structure morphogenesis#GO:0032989;0.95 cellular component organization and biogenesis#GO:0016043
10007	21	1.00 SUBFAMILY NOT NAMED#PTHR10407:SF12	0.95 I_LWEQ;0.43 SH3_2;0.19 SH3_1;0.14 SH3_9	0.43	0.05 Transmembrane	0.05 Signal Peptide	1.00 protein binding#GO:0005515;1.00 binding#GO:0005488;1.00 structural molecule activity#GO:0005198;1.00 actin binding#GO:0003779;1.00 structural constituent of cytoskeleton#GO:0005200;1.00 cytoskeletal protein binding#GO:0008092	1.00 actin cytoskeleton#GO:0015629;1.00 cytoskeleton#GO:0005856;1.00 intracellular#GO:0005622	1.00 cellular process#GO:0009987;1.00 developmental process#GO:0032502;1.00 anatomical structure morphogenesis#GO:0009653;1.00 cellular structure morphogenesis#GO:0032989;1.00 cellular component organization and biogenesis#GO:0016043
10015	21	0.05 SYNAPSE-ASSOCIATED PROTEIN#PTHR16019	1.00 SH2;0.05 BSD	1	0.14 Transmembrane				0.05 synaptic transmission#GO:0007268;0.05 neurological system process#GO:0050877;0.05 cellular process#GO:0009987;0.05 system process#GO:0003008;0.05 cell communication#GO:0007154;0.05 cell-cell signaling#GO:0007267
10016	21	0.81 SUBFAMILY NOT NAMED#PTHR10891:SF517;0.05 CALCIUM BINDING PROTEIN#PTHR23050	0.67 EF-hand_6;0.52 EF-hand_7;0.19 EF-hand_1;0.05 EF-hand_8	0	0.05 Transmembrane		0.86 calcium ion binding#GO:0005509;0.86 calmodulin binding#GO:0005516;0.86 protein binding#GO:0005515;0.86 binding#GO:0005488;0.81 enzyme regulator activity#GO:0030234;0.81 receptor binding#GO:0005102		0.86 calcium-mediated signaling#GO:0019722;0.86 cellular process#GO:0009987;0.86 intracellular signaling cascade#GO:0007242;0.86 cell communication#GO:0007154;0.86 cell cycle#GO:0007049;0.86 signal transduction#GO:0007165;0.81 transport#GO:0006810;0.81 ion transport#GO:0006811;0.81 cation transport#GO:0006812;0.05 cell motility#GO:0006928
10017	21	0.95 CALCIUM BINDING PROTEIN#PTHR23050	0.76 EF-hand_7;0.71 EF-hand_8;0.05 EF-hand_6	0		0.10 Signal Peptide	0.95 calcium ion binding#GO:0005509;0.95 calmodulin binding#GO:0005516;0.95 protein binding#GO:0005515;0.95 binding#GO:0005488		0.95 signal transduction#GO:0007165;0.95 cellular process#GO:0009987;0.95 cell communication#GO:0007154;0.95 intracellular signaling cascade#GO:0007242;0.95 cell cycle#GO:0007049;0.95 cell motility#GO:0006928;0.95 calcium-mediated signaling#GO:0019722
10020	21	1.00 SUBFAMILY NOT NAMED#PTHR23281:SF10	1.00 FERM_N;1.00 FERM_C;1.00 FERM_M;0.95 PH;0.57 SAM_2;0.10 SAM_1;0.05 GlcNAc_2-epim	0			1.00 structural molecule activity#GO:0005198;1.00 structural constituent of cytoskeleton#GO:0005200	1.00 actin cytoskeleton#GO:0015629;1.00 cytoskeleton#GO:0005856;1.00 intracellular#GO:0005622	1.00 cellular component organization and biogenesis#GO:0016043;1.00 cellular structure morphogenesis#GO:0032989;1.00 cellular process#GO:0009987;1.00 anatomical structure morphogenesis#GO:0009653;1.00 developmental process#GO:0032502
