# Supplementary material for: Gene family innovation, conservation and loss on the animal stem lineage
Source: eLife journal article supplement (doi:10.7554/elife.34226), 2018-05-31
Supplement: supp [file elife-34226-supp-v1.zip › elife_poa_e34226_Supplementary_File_8.xlsx]

## Sheet: 8 MAPLE Urmetazoan
Urmetazoan Gained or Lost	Classification A	Classification B	MAPLE ID	Type	Name	Difference Urmetazoan - Urchoanozoan %	Components (#)	Urchoanozoan completeness %	Urmetazoan completeness %
Lost	Carbohydrate and lipid metabolism	Central carbohydrate metabolism	M00009	Pathway	Citrate cycle (TCA cycle, Krebs cycle)	-37.5	8	100	62.5
Lost	Carbohydrate and lipid metabolism	Central carbohydrate metabolism	M00011	Pathway	Citrate cycle, second carbon oxidation, 2-oxoglutarate => oxaloacetate	-60	5	100	40
Lost	Carbohydrate and lipid metabolism	Central carbohydrate metabolism	M00007	Pathway	Pentose phosphate pathway, non-oxidative phase, fructose 6P => ribose 5P	-25	4	100	75
Lost	Carbohydrate and lipid metabolism	Fatty acid metabolism	M00113	Pathway	Jasmonic acid biosynthesis	-37.5	8	62.5	25
Lost	Carbohydrate and lipid metabolism	Glycan metabolism	M00074	Pathway	N-glycan biosynthesis, high-mannose type	-50	6	83.3	33.3
Lost	Carbohydrate and lipid metabolism	Glycan metabolism	M00055	Pathway	N-glycan precursor biosynthesis	-30.8	13	92.3	61.5
Lost	Carbohydrate and lipid metabolism	Lipid metabolism	M00098	Pathway	Acylglycerol degradation	-50	2	100	50
Lost	Carbohydrate and lipid metabolism	Other carbohydrate metabolism	M00630	Pathway	D-Galacturonate degradation (fungi), D-galacturonate => glycerol	-25	4	50	25
Lost	Carbohydrate and lipid metabolism	Other carbohydrate metabolism	M00014	Pathway	Glucuronate pathway (uronate pathway)	-25	8	87.5	62.5
Lost	Carbohydrate and lipid metabolism	Other carbohydrate metabolism	M00012	Pathway	Glyoxylate cycle	-40	5	100	60
Lost	Carbohydrate and lipid metabolism	Other carbohydrate metabolism	M00081	Pathway	Pectin degradation	-66.7	3	66.7	0
Lost	Carbohydrate and lipid metabolism	Other carbohydrate metabolism	M00741	Pathway	Propanoyl-CoA metabolism, propanoyl-CoA => succinyl-CoA	-33.3	3	100	66.7
Lost	Carbohydrate and lipid metabolism	Sterol biosynthesis	M00109	Pathway	C21-Steroid hormone biosynthesis, progesterone => cortisol/cortisone	-25	4	50	25
Lost	Carbohydrate and lipid metabolism	Sterol biosynthesis	M00102	Pathway	Ergocalciferol biosynthesis	-40	5	100	60
Lost	Carbohydrate and lipid metabolism	Terpenoid backbone biosynthesis	M00366	Pathway	C10-C20 isoprenoid biosynthesis, plants	-25	4	75	50
Lost	Energy metabolism	ATP synthesis	M00154	Complex	Cytochrome c oxidase	-26.7	15	80	53.3
Lost	Energy metabolism	ATP synthesis	M00143	Complex	NADH dehydrogenase (ubiquinone) Fe-S protein/flavoprotein complex, mitochondria	-30	10	90	60
Lost	Energy metabolism	ATP synthesis	M00148	Complex	Succinate dehydrogenase (ubiquinone)	-25	4	100	75
Lost	Energy metabolism	Carbon fixation	M00170	Pathway	C4-dicarboxylic acid cycle, phosphoenolpyruvate carboxykinase type	-25	4	75	50
Lost	Energy metabolism	Carbon fixation	M00168	Pathway	CAM (Crassulacean acid metabolism), dark	-50	2	50	0
Lost	Energy metabolism	Methane metabolism	M00345	Pathway	Formaldehyde assimilation, ribulose monophosphate pathway	-33.4	4	66.7	33.3
Lost	Energy metabolism	Methane metabolism	M00344	Pathway	Formaldehyde assimilation, xylulose monophosphate pathway	-50	4	75	25
Lost	Energy metabolism	Nitrogen metabolism	M00531	Pathway	Assimilatory nitrate reduction, nitrate => ammonia	-50	2	50	0
Lost	Energy metabolism	Sulfur metabolism	M00176	Pathway	Assimilatory sulfate reduction, sulfate => H2S	-66.7	3	100	33.3
Lost	Environmental information processing	Two-component regulatory system	M00516	FuncSet	SLN1-YPD1-SSK1/SKN7 (osmosensing) two-component regulatory system	-100	1..3	100	0
Lost	Gene set	Metabolic capacity	M00615	Signature	Nitrate assimilation	-33.3	3	33.3	0
Lost	Gene set	Metabolic capacity	M00616	Signature	Sulfate-sulfur assimilation	-50	4	75	25
Lost	Genetic information processing	DNA polymerase	M00293	Complex	DNA polymerase zeta complex	-50	2	100	50
Lost	Genetic information processing	Protein processing	M00410	Complex	ESCRT-II complex	-33.4	3	66.7	33.3
Lost	Genetic information processing	Protein processing	M00401	Complex	Sec61 complex	-33.3	3	100	66.7
Lost	Genetic information processing	Repair system	M00297	Complex	DNA-PK complex	-33.3	3	100	66.7
Lost	Genetic information processing	Replication system	M00286	Complex	GINS complex	-50	4	100	50
Lost	Genetic information processing	Replication system	M00288	Complex	RPA complex	-33.4	3	66.7	33.3
Lost	Genetic information processing	Ubiquitin system	M00389	Complex	APC/C complex	-25	12	91.7	66.7
Lost	Nucleotide and amino acid metabolism	Arginine and proline metabolism	M00028	Pathway	Ornithine biosynthesis, glutamate => ornithine	-40	5	80	40
Lost	Nucleotide and amino acid metabolism	Aromatic amino acid metabolism	M00350	Pathway	Capsaicin biosynthesis, L-Phenylalanine => Capsaicin	-50	4	50	0
Lost	Nucleotide and amino acid metabolism	Aromatic amino acid metabolism	M00042	Pathway	Catecholamine biosynthesis, tyrosine => dopamine => noradrenaline => adrenaline	-25	4	75	50
Lost	Nucleotide and amino acid metabolism	Aromatic amino acid metabolism	M00024	Pathway	Phenylalanine biosynthesis, chorismate => phenylalanine	-100	3	100	0
Lost	Nucleotide and amino acid metabolism	Aromatic amino acid metabolism	M00022	Pathway	Shikimate pathway, phosphoenolpyruvate + erythrose-4P => chorismate	-60	6..7	100	40
Lost	Nucleotide and amino acid metabolism	Aromatic amino acid metabolism	M00043	Pathway	Thyroid hormone biosynthesis, tyrosine => triiodothyronine/thyroxine	-100	1	100	0
Lost	Nucleotide and amino acid metabolism	Aromatic amino acid metabolism	M00023	Pathway	Tryptophan biosynthesis, chorismate => tryptophan	-100	5	100	0
Lost	Nucleotide and amino acid metabolism	Aromatic amino acid metabolism	M00025	Pathway	Tyrosine biosynthesis, chorismate => tyrosine	-66.7	2..3	66.7	0
Lost	Nucleotide and amino acid metabolism	Branched-chain amino acid metabolism	M00535	Pathway	Isoleucine biosynthesis, pyruvate => 2-oxobutanoate	-33.3	3	33.3	0
Lost	Nucleotide and amino acid metabolism	Branched-chain amino acid metabolism	M00570	Pathway	Isoleucine biosynthesis, threonine => 2-oxobutanoate => isoleucine	-40	5	100	60
Lost	Nucleotide and amino acid metabolism	Branched-chain amino acid metabolism	M00432	Pathway	Leucine biosynthesis, 2-oxoisovalerate => 2-oxoisocaproate	-100	3	100	0
Lost	Nucleotide and amino acid metabolism	Branched-chain amino acid metabolism	M00019	Pathway	Valine/isoleucine biosynthesis, pyruvate => valine / 2-oxobutanoate => isoleucine	-50	4	100	50
Lost	Nucleotide and amino acid metabolism	Cofactor and vitamin biosynthesis	M00123	Pathway	Biotin biosynthesis, pimeloyl-ACP/CoA => biotin	-33.3	3..4	33.3	0
Lost	Nucleotide and amino acid metabolism	Cofactor and vitamin biosynthesis	M00115	Pathway	NAD biosynthesis, aspartate => NAD	-40	5	60	20
Lost	Nucleotide and amino acid metabolism	Cofactor and vitamin biosynthesis	M00119	Pathway	Pantothenate biosynthesis, valine/L-aspartate => pantothenate	-40	5	60	20
Lost	Nucleotide and amino acid metabolism	Cofactor and vitamin biosynthesis	M00125	Pathway	Riboflavin biosynthesis, GTP => riboflavin/FMN/FAD	-71.4	8	85.7	14.3
Lost	Nucleotide and amino acid metabolism	Cofactor and vitamin biosynthesis	M00126	Pathway	Tetrahydrofolate biosynthesis, GTP => THF	-40	5..7	100	60
Lost	Nucleotide and amino acid metabolism	Cofactor and vitamin biosynthesis	M00128	Pathway	Ubiquinone biosynthesis, eukaryotes, 4-hydroxybenzoate => ubiquinone	-50	6	100	50
Lost	Nucleotide and amino acid metabolism	Cysteine and methionine metabolism	M00017	Pathway	Methionine biosynthesis, apartate => homoserine => methionine	-71.4	7	85.7	14.3
Lost	Nucleotide and amino acid metabolism	Histidine metabolism	M00026	Pathway	Histidine biosynthesis, PRPP => histidine	-75	7..9	100	25
Lost	Nucleotide and amino acid metabolism	Lysine metabolism	M00433	Pathway	Lysine biosynthesis, 2-oxoglutarate => 2-oxoadipate	-100	4	100	0
Lost	Nucleotide and amino acid metabolism	Lysine metabolism	M00030	Pathway	Lysine biosynthesis, AAA pathway, 2-oxoglutarate => 2-aminoadipate => lysine	-62.5	8	100	37.5
Lost	Nucleotide and amino acid metabolism	Lysine metabolism	M00525	Pathway	Lysine biosynthesis, acetyl-DAP pathway, aspartate => lysine	-33.4	9	55.6	22.2
Lost	Nucleotide and amino acid metabolism	Lysine metabolism	M00527	Pathway	Lysine biosynthesis, DAP aminotransferase pathway, aspartate => lysine	-42.8	7	71.4	28.6
Lost	Nucleotide and amino acid metabolism	Lysine metabolism	M00526	Pathway	Lysine biosynthesis, DAP dehydrogenase pathway, aspartate => lysine	-50	6	66.7	16.7
Lost	Nucleotide and amino acid metabolism	Lysine metabolism	M00016	Pathway	Lysine biosynthesis, succinyl-DAP pathway, aspartate => lysine	-33.4	9	55.6	22.2
Lost	Nucleotide and amino acid metabolism	Other amino acid metabolism	M00033	Pathway	Ectoine biosynthesis, aspartate => ectoine	-40	5	40	0
Lost	Nucleotide and amino acid metabolism	Polyamine biosynthesis	M00134	Pathway	Polyamine biosynthesis, arginine => ornithine => putrescine	-50	2	100	50
Lost	Nucleotide and amino acid metabolism	Serine and threonine metabolism	M00555	Pathway	Betaine biosynthesis, choline => betaine	-50	2	100	50
Lost	Nucleotide and amino acid metabolism	Serine and threonine metabolism	M00018	Pathway	Threonine biosynthesis, aspartate => homoserine => threonine	-60	5	80	20
Lost	Secondary metabolism	Biosynthesis of secondary metabolites	M00137	Pathway	Flavanone biosynthesis, phenylalanine => naringenin	-40	5	40	0
Gained	Carbohydrate and lipid metabolism	Fatty acid metabolism	M00088	Pathway	Ketone body biosynthesis, acetyl-CoA => acetoacetate/3-hydroxybutyrate/acetone	40	5	40	80
Gained	Carbohydrate and lipid metabolism	Glycan metabolism	M00070	Pathway	Glycosphingolipid biosynthesis, lacto-series, LacCer => Lc4Cer	100	2	0	100
Gained	Carbohydrate and lipid metabolism	Glycan metabolism	M00071	Pathway	Glycosphingolipid biosynthesis, neolacto-series, LacCer => nLc4Cer	100	2	0	100
Gained	Carbohydrate and lipid metabolism	Glycan metabolism	M00075	Pathway	N-glycan biosynthesis, complex type	55.6	9	11.1	66.7
Gained	Carbohydrate and lipid metabolism	Glycosaminoglycan metabolism	M00058	Pathway	Glycosaminoglycan biosynthesis, chondroitin sulfate backbone	100	2	0	100
Gained	Carbohydrate and lipid metabolism	Glycosaminoglycan metabolism	M00059	Pathway	Glycosaminoglycan biosynthesis, heparan sulfate backbone	40	5	60	100
Gained	Carbohydrate and lipid metabolism	Glycosaminoglycan metabolism	M00078	Pathway	Heparan sulfate degradation	50	8	25	75
Gained	Carbohydrate and lipid metabolism	Glycosaminoglycan metabolism	M00079	Pathway	Keratan sulfate degradation	75	4	25	100
Gained	Carbohydrate and lipid metabolism	Lipid metabolism	M00066	Pathway	Lactosylceramide biosynthesis	50	2	50	100
Gained	Carbohydrate and lipid metabolism	Lipid metabolism	M00089	Pathway	Triacylglycerol biosynthesis	25	4	75	100
Gained	Carbohydrate and lipid metabolism	Lipopolysaccharide metabolism	M00063	Pathway	CMP-KDO biosynthesis	25	4	0	25
Gained	Carbohydrate and lipid metabolism	Other carbohydrate metabolism	M00793	Pathway	dTDP-L-rhamnose biosynthesis	25	4	25	50
Gained	Cellular processes	Cell signaling	M00681	FuncSet	Activin signaling	100	3	0	100
Gained	Cellular processes	Cell signaling	M00685	FuncSet	Apoptotic machinery	33.4	3	33.3	66.7
Gained	Cellular processes	Cell signaling	M00679	FuncSet	BMP signaling	100	3	0	100
Gained	Cellular processes	Cell signaling	M00692	FuncSet	Cell cycle - G1/S transition	50	2	50	100
Gained	Cellular processes	Cell signaling	M00678	FuncSet	Hedgehog signaling	80	5	20	100
Gained	Cellular processes	Cell signaling	M00683	FuncSet	Hippo signaling	50	4	0	50
Gained	Cellular processes	Cell signaling	M00684	FuncSet	JAK-STAT signaling	33.3	3	0	33.3
Gained	Cellular processes	Cell signaling	M00690	FuncSet	MAPK (ERK5) signaling	33.4	3	33.3	66.7
Gained	Cellular processes	Cell signaling	M00688	FuncSet	MAPK (JNK) signaling	66.7	3	33.3	100
Gained	Cellular processes	Cell signaling	M00689	FuncSet	MAPK (p38) signaling	33.3	3	66.7	100
Gained	Cellular processes	Cell signaling	M00676	FuncSet	PI3K-Akt signaling	40	5	60	100
Gained	Cellular processes	Cell signaling	M00680	FuncSet	TGF-beta signaling	100	3	0	100
Gained	Cellular processes	Cell signaling	M00686	FuncSet	Toll-like receptor signaling	50	8	25	75
Gained	Cellular processes	Cell signaling	M00677	FuncSet	Wnt signaling	50	6	50	100
Gained	Environmental information processing	ABC-2 type and other transport systems	M00258	Complex	Putative ABC transport system	50	2	0	50
Gained	Environmental information processing	Mineral and organic ion transport system	M00185	Complex	Sulfate transport system	25	4	0	25
Gained	Genetic information processing	DNA polymerase	M00262	Complex	DNA polymerase delta complex	25	4	75	100
Gained	Genetic information processing	DNA polymerase	M00294	Complex	DNA polymerase gamma complex	50	2	50	100
Gained	Genetic information processing	Protein processing	M00402	Complex	Translocon-associated protein (TRAP) complex	25	4	50	75
Gained	Genetic information processing	Repair system	M00291	Complex	MRN complex	33.3	3	66.7	100
Gained	Genetic information processing	RNA processing	M00395	Complex	Decapping complex	40	5	60	100
Gained	Genetic information processing	RNA processing	M00427	Complex	Nuclear pore complex	27.3	33	60.6	87.9
Gained	Genetic information processing	RNA processing	M00394	Complex	RNA degradosome	25	4	25	50
Gained	Genetic information processing	RNA processing	M00426	Complex	Survival motor neuron (SMN) complex	50	2	0	50
Gained	Genetic information processing	Ubiquitin system	M00385	Complex	Cul4-DDB1-DDB2 complex	25	4	25	50
Gained	Genetic information processing	Ubiquitin system	M00388	Complex	ECS complex	80	5	20	100
Gained	Genetic information processing	Ubiquitin system	M00382	Complex	SCF-FBS complex	25	4	75	100
Gained	Nucleotide and amino acid metabolism	Aromatic amino acid metabolism	M00037	Pathway	Melatonin biosynthesis, tryptophan => serotonin => melatonin	50	4	25	75
Gained	Nucleotide and amino acid metabolism	Aromatic amino acid metabolism	M00044	Pathway	Tyrosine degradation, tyrosine => homogentisate	60	5	20	80
Gained	Nucleotide and amino acid metabolism	Histidine metabolism	M00045	Pathway	Histidine degradation, histidine => N-formiminoglutamate => glutamate	25	4	25	50
Gained	Nucleotide and amino acid metabolism	Other amino acid metabolism	M00047	Pathway	Creatine pathway	33.4	3	33.3	66.7
