# Supplementary material for: Gene family innovation, conservation and loss on the animal stem lineage
Source: eLife journal article supplement (doi:10.7554/elife.34226), 2018-05-31
Supplement: supp [file elife-34226-supp-v1.zip › elife_poa_e34226_Supplementary_File_9.xlsx]

## Sheet: 9 MAPLE Urchoanoflagellate
Urchoanoflagellate Gained or Lost	Classification A	Classification B	MAPLE ID	Type	Name	Difference Urchoanoflagellate - Urchoanozoan %	Components (#)	Urchoanozoan completeness %	Urchoanoflagellate completeness %
Lost	Carbohydrate and lipid metabolism	Fatty acid metabolism	M00415	Pathway	Fatty acid biosynthesis, elongation, endoplasmic reticulum	-25	4	100	75
Lost	Carbohydrate and lipid metabolism	Fatty acid metabolism	M00113	Pathway	Jasmonic acid biosynthesis	-25	8	62.5	37.5
Lost	Carbohydrate and lipid metabolism	Other carbohydrate metabolism	M00793	Pathway	dTDP-L-rhamnose biosynthesis	-25	4	25	0
Lost	Carbohydrate and lipid metabolism	Sterol biosynthesis	M00109	Pathway	C21-Steroid hormone biosynthesis, progesterone => cortisol/cortisone	-25	4	50	25
Lost	Carbohydrate and lipid metabolism	Sterol biosynthesis	M00103	Pathway	Cholecalciferol biosynthesis	-50	2	50	0
Lost	Carbohydrate and lipid metabolism	Terpenoid backbone biosynthesis	M00366	Pathway	C10-C20 isoprenoid biosynthesis, plants	-25	4	75	50
Lost	Cellular processes	Cell signaling	M00685	FuncSet	Apoptotic machinery	-33.3	3	33.3	0
Lost	Cellular processes	Cell signaling	M00677	FuncSet	Wnt signaling	-33.3	6	50	16.7
Lost	Energy metabolism	ATP synthesis	M00151	Complex	Cytochrome bc1 complex respiratory unit	-33.3	3	100	66.7
Lost	Energy metabolism	ATP synthesis	M00142	Complex	NADH:ubiquinone oxidoreductase, mitochondria	-28.6	7	28.6	0
Lost	Genetic information processing	Ubiquitin system	M00384	Complex	Cul3-SPOP complex	-33.3	3	100	66.7
Lost	Nucleotide and amino acid metabolism	Arginine and proline metabolism	M00028	Pathway	Ornithine biosynthesis, glutamate => ornithine	-30	5	80	50
Lost	Nucleotide and amino acid metabolism	Aromatic amino acid metabolism	M00350	Pathway	Capsaicin biosynthesis, L-Phenylalanine => Capsaicin	-25	4	50	25
Lost	Nucleotide and amino acid metabolism	Aromatic amino acid metabolism	M00042	Pathway	Catecholamine biosynthesis, tyrosine => dopamine => noradrenaline => adrenaline	-25	4	75	50
Lost	Nucleotide and amino acid metabolism	Aromatic amino acid metabolism	M00024	Pathway	Phenylalanine biosynthesis, chorismate => phenylalanine	-33.3	3	100	66.7
Lost	Nucleotide and amino acid metabolism	Aromatic amino acid metabolism	M00043	Pathway	Thyroid hormone biosynthesis, tyrosine => triiodothyronine/thyroxine	-100	1	100	0
Lost	Nucleotide and amino acid metabolism	Cofactor and vitamin biosynthesis	M00127	Pathway	Thiamine biosynthesis, AIR => thiamine-P/thiamine-2P	-40	5	40	0
Lost	Nucleotide and amino acid metabolism	Lysine metabolism	M00433	Pathway	Lysine biosynthesis, 2-oxoglutarate => 2-oxoadipate	-25	4	100	75
Gained	Carbohydrate and lipid metabolism	Fatty acid metabolism	M00085	Pathway	Fatty acid biosynthesis, elongation, mitochondria	25	3..4	75	100
Gained	Carbohydrate and lipid metabolism	Fatty acid metabolism	M00088	Pathway	Ketone body biosynthesis, acetyl-CoA => acetoacetate/3-hydroxybutyrate/acetone	60	5	40	100
Gained	Carbohydrate and lipid metabolism	Glycan metabolism	M00070	Pathway	Glycosphingolipid biosynthesis, lacto-series, LacCer => Lc4Cer	100	2	0	100
Gained	Carbohydrate and lipid metabolism	Glycan metabolism	M00071	Pathway	Glycosphingolipid biosynthesis, neolacto-series, LacCer => nLc4Cer	100	2	0	100
Gained	Carbohydrate and lipid metabolism	Glycan metabolism	M00075	Pathway	N-glycan biosynthesis, complex type	66.7	9	11.1	77.8
Gained	Carbohydrate and lipid metabolism	Glycosaminoglycan metabolism	M00077	Pathway	Chondroitin sulfate degradation	25	4	75	100
Gained	Carbohydrate and lipid metabolism	Glycosaminoglycan metabolism	M00076	Pathway	Dermatan sulfate degradation	40	5	60	100
Gained	Carbohydrate and lipid metabolism	Glycosaminoglycan metabolism	M00058	Pathway	Glycosaminoglycan biosynthesis, chondroitin sulfate backbone	100	2	0	100
Gained	Carbohydrate and lipid metabolism	Glycosaminoglycan metabolism	M00057	Pathway	Glycosaminoglycan biosynthesis, linkage tetrasaccharide	25	4	75	100
Gained	Carbohydrate and lipid metabolism	Glycosaminoglycan metabolism	M00078	Pathway	Heparan sulfate degradation	75	8	25	100
Gained	Carbohydrate and lipid metabolism	Glycosaminoglycan metabolism	M00079	Pathway	Keratan sulfate degradation	75	4	25	100
Gained	Carbohydrate and lipid metabolism	Lipid metabolism	M00131	Pathway	Inositol phosphate metabolism, Ins(1,3,4,5)P4 => Ins(1,3,4)P3 => myo-inositol	25	4	75	100
Gained	Carbohydrate and lipid metabolism	Lipid metabolism	M00132	Pathway	Inositol phosphate metabolism, Ins(1,3,4)P3 => phytate	33.3	3	66.7	100
Gained	Carbohydrate and lipid metabolism	Lipid metabolism	M00130	Pathway	Inositol phosphate metabolism, PI=> PIP2 => Ins(1,4,5)P3 => Ins(1,3,4,5)P4	25	4	75	100
Gained	Carbohydrate and lipid metabolism	Lipid metabolism	M00089	Pathway	Triacylglycerol biosynthesis	25	4	75	100
Gained	Carbohydrate and lipid metabolism	Lipopolysaccharide metabolism	M00063	Pathway	CMP-KDO biosynthesis	50	4	0	50
Gained	Carbohydrate and lipid metabolism	Other carbohydrate metabolism	M00013	Pathway	Malonate semialdehyde pathway, propanoyl-CoA => acetyl-CoA	25	4	75	100
Gained	Carbohydrate and lipid metabolism	Other carbohydrate metabolism	M00565	Pathway	Trehalose biosynthesis, D-glucose 1P => trehalose	33.3	6	16.7	50
Gained	Carbohydrate and lipid metabolism	Other terpenoid biosynthesis	M00372	Pathway	Abscisic acid biosynthesis, beta-carotene => abscisic acid	40	5	20	60
Gained	Carbohydrate and lipid metabolism	Sterol biosynthesis	M00107	Pathway	Steroid hormone biosynthesis, cholesterol => prognenolone => progesterone	50	2	0	50
Gained	Cellular processes	Cell signaling	M00679	FuncSet	BMP signaling	33.3	3	0	33.3
Gained	Cellular processes	Cell signaling	M00683	FuncSet	Hippo signaling	50	4	0	50
Gained	Cellular processes	Cell signaling	M00684	FuncSet	JAK-STAT signaling	33.3	3	0	33.3
Gained	Cellular processes	Cell signaling	M00690	FuncSet	MAPK (ERK5) signaling	66.7	3	33.3	100
Gained	Cellular processes	Cell signaling	M00688	FuncSet	MAPK (JNK) signaling	33.4	3	33.3	66.7
Gained	Cellular processes	Cell signaling	M00689	FuncSet	MAPK (p38) signaling	33.3	3	66.7	100
Gained	Cellular processes	Cell signaling	M00682	FuncSet	Notch signaling	33.3	3	66.7	100
Gained	Energy metabolism	ATP synthesis	M00152	Complex	Cytochrome bc1 complex	30	10	50	80
Gained	Energy metabolism	ATP synthesis	M00146	Complex	NADH dehydrogenase (ubiquinone) 1 alpha subcomplex	35.7	14	42.9	78.6
Gained	Environmental information processing	ABC-2 type and other transport systems	M00258	Complex	Putative ABC transport system	50	2	0	50
Gained	Environmental information processing	Drug resistance	M00729	FuncSet	Fluoroquinolone resistance, gyrase-protecting protein Qnr	33.3	3	0	33.3
Gained	Environmental information processing	Mineral and organic ion transport system	M00185	Complex	Sulfate transport system	25	4	0	25
Gained	Environmental information processing	Saccharide, polyol, and lipid transport system	M00211	Complex	Putative ABC transport system	50	2	0	50
Gained	Genetic information processing	DNA polymerase	M00262	Complex	DNA polymerase delta complex	25	4	75	100
Gained	Genetic information processing	Protein processing	M00409	Complex	ESCRT-I complex	25	4	50	75
Gained	Genetic information processing	Protein processing	M00410	Complex	ESCRT-II complex	33.3	3	66.7	100
Gained	Genetic information processing	Protein processing	M00402	Complex	Translocon-associated protein (TRAP) complex	50	4	50	100
Gained	Genetic information processing	Repair system	M00291	Complex	MRN complex	33.3	3	66.7	100
Gained	Genetic information processing	Replication system	M00288	Complex	RPA complex	33.3	3	66.7	100
Gained	Genetic information processing	Replication system	M00424	Complex	Shelterin complex	40	5	0	40
Gained	Genetic information processing	RNA polymerase	M00183	Complex	RNA polymerase, bacteria	25	4	0	25
Gained	Genetic information processing	RNA processing	M00394	Complex	RNA degradosome	25	4	25	50
Gained	Genetic information processing	RNA processing	M00426	Complex	Survival motor neuron (SMN) complex	100	2	0	100
Gained	Genetic information processing	Ubiquitin system	M00386	Complex	Cul4-DDB1-CSA complex	50	4	50	100
Gained	Genetic information processing	Ubiquitin system	M00385	Complex	Cul4-DDB1-DDB2 complex	50	4	25	75
Gained	Nucleotide and amino acid metabolism	Aromatic amino acid metabolism	M00037	Pathway	Melatonin biosynthesis, tryptophan => serotonin => melatonin	25	4	25	50
Gained	Nucleotide and amino acid metabolism	Aromatic amino acid metabolism	M00040	Pathway	Tyrosine biosynthesis, prephanate => pretyrosine => tyrosine	50	2	0	50
Gained	Nucleotide and amino acid metabolism	Aromatic amino acid metabolism	M00044	Pathway	Tyrosine degradation, tyrosine => homogentisate	80	5	20	100
Gained	Nucleotide and amino acid metabolism	Branched-chain amino acid metabolism	M00036	Pathway	Leucine degradation, leucine => acetoacetate + acetyl-CoA	33.3	6	66.7	100
Gained	Nucleotide and amino acid metabolism	Cofactor and vitamin biosynthesis	M00572	Pathway	Pimeloyl-ACP biosynthesis, BioC-BioH pathway, malonyl-ACP => pimeloyl-ACP	33.3	6	16.7	50
Gained	Nucleotide and amino acid metabolism	Cofactor and vitamin biosynthesis	M00112	Pathway	Tocopherol/tocotorienol biosynthesis	75	4	0	75
Gained	Nucleotide and amino acid metabolism	Histidine metabolism	M00045	Pathway	Histidine degradation, histidine => N-formiminoglutamate => glutamate	75	4	25	100
Gained	Nucleotide and amino acid metabolism	Polyamine biosynthesis	M00135	Pathway	GABA biosynthesis, eukaryotes, putrescine => GABA	66.7	3	33.3	100
Gained	Nucleotide and amino acid metabolism	Purine metabolism	M00048	Pathway	Inosine monophosphate biosynthesis, PRPP + glutamine => IMP	33.3	9..11	66.7	100
Gained	Nucleotide and amino acid metabolism	Serine and threonine metabolism	M00020	Pathway	Serine biosynthesis, glycerate-3P => serine	33.3	3	66.7	100
Gained	Secondary metabolism	Biosynthesis of secondary metabolites	M00369	Pathway	Cyanogenic glycoside biosynthesis, tyrosine => dhurrin	33.3	3	0	33.3
Gained	Secondary metabolism	Biosynthesis of secondary metabolites	M00138	Pathway	Flavonoid biosynthesis, naringenin => pelargonidin	33.3	3	0	33.3
Gained	Secondary metabolism	Biosynthesis of secondary metabolites	M00672	Pathway	Penicillin biosynthesis, aminoadipate + cycteine + valine => penicillin	33.3	3	0	33.3
