# Supplementary material for: Gene family innovation, conservation and loss on the animal stem lineage
Source: eLife journal article supplement (doi:10.7554/elife.34226), 2018-05-31
Supplement: supp [file elife-34226-supp-v1.zip › elife_poa_e34226_Supplementary_File_10.xlsx]

## Sheet: 10 MAPLE Urchoanozoan
Urchoanozoan Gained or Lost	Classification A	Classification B	MAPLE ID	Type	Name	Difference Urchoanozoan - Urholozoan %	Components (#)	Urholozoan completeness %	Urchoanozoan completeness %
Gained	Carbohydrate and lipid metabolism	Glycosaminoglycan metabolism	M00077	Pathway	Chondroitin sulfate degradation	50	4	50	100
Gained	Carbohydrate and lipid metabolism	Lipid metabolism	M00067	Pathway	Sulfoglycolipids biosynthesis, ceramide/1-alkyl-2-acylglycerol => sulfatide/seminolipid	50	2	50	100
Gained	Nucleotide and amino acid metabolism	Cofactor and vitamin biosynthesis	M00118	Pathway	Glutathione biosynthesis, glutamate => glutathione	50	2	50	100
Gained	Genetic information processing	RNA processing	M00426	Complex	Survival motor neuron (SMN) complex	50	2	0	50
Gained	Carbohydrate and lipid metabolism	Glycosaminoglycan metabolism	M00076	Pathway	Dermatan sulfate degradation	40	5	60	100
Gained	Genetic information processing	Repair system	M00291	Complex	MRN complex	33.3	3	66.7	100
Gained	Genetic information processing	RNA processing	M00393	Complex	TRAMP complex	33.3	3	66.7	100
Gained	Genetic information processing	Protein processing	M00401	Complex	Sec61 complex	33.3	3	66.7	100
Gained	Carbohydrate and lipid metabolism	Glycan metabolism	M00056	Pathway	O-glycan biosynthesis, mucin type core	25	4	25	50
Gained	Carbohydrate and lipid metabolism	Glycosaminoglycan metabolism	M00078	Pathway	Heparan sulfate degradation	25	8	75	100
Gained	Carbohydrate and lipid metabolism	Glycosaminoglycan metabolism	M00079	Pathway	Keratan sulfate degradation	25	4	75	100
Gained	Genetic information processing	DNA polymerase	M00262	Complex	DNA polymerase delta complex	25	4	75	100
Gained	Genetic information processing	DNA polymerase	M00263	Complex	DNA polymerase epsilon complex	25	4	75	100
Gained	Environmental information processing	Mineral and organic ion transport system	M00185	Complex	Sulfate transport system	25	4	0	25
Gained	Cellular processes	Cell signaling	M00683	FuncSet	Hippo signaling	25	4	25	50
Lost	Energy metabolism	Carbon fixation	M00172	Pathway	C4-dicarboxylic acid cycle, NADP - malic enzyme type	-25	4	50	25
Lost	Energy metabolism	Carbon fixation	M00170	Pathway	C4-dicarboxylic acid cycle, phosphoenolpyruvate carboxykinase type	-25	4	100	75
Lost	Nucleotide and amino acid metabolism	Lysine metabolism	M00433	Pathway	Lysine biosynthesis, 2-oxoglutarate => 2-oxoadipate	-25	4	100	75
Lost	Energy metabolism	Sulfur metabolism	M00596	Pathway	Dissimilatory sulfate reduction, sulfate => H2S	-33.3	3	33.3	0
Lost	Energy metabolism	Carbon fixation	M00168	Pathway	CAM (Crassulacean acid metabolism), dark	-50	2	100	50
Lost	Nucleotide and amino acid metabolism	Cofactor and vitamin biosynthesis	M00123	Pathway	Biotin biosynthesis, pimeloyl-ACP/CoA => biotin	-66.7	3..4	100	33.3
