# Supplementary material for: Gene family innovation, conservation and loss on the animal stem lineage
Source: eLife journal article supplement (doi:10.7554/elife.34226), 2018-05-31
Supplement: supp [file elife-34226-supp-v1.zip › elife_poa_e34226_Supplementary_File_11.xlsx]

## Sheet: 11 Antibiotics tested
Antibiotic	Abbreviation	Vehicle	Final Concentration (mg/ml)
ampicillin	A	water	100
chloramphenicol	C	100% ethanol	170
erythromycin	E	100% ethanol	50
gentamicin	G	water	50
kanamycin	K	water	50
ofloxacin	O	0.1M NaOH	10
polymyxin B	P	water	50
rifampicin	R	methanol	25
streptomycin	S	water	50
tetracycline	T	70% ethanol	50
