# Supplementary material for: Gene family innovation, conservation and loss on the animal stem lineage
Source: eLife journal article supplement (doi:10.7554/elife.34226), 2018-05-31
Supplement: supp [file elife-34226-supp-v1.zip › elife_poa_e34226_Supplementary_File_12.xlsx]

## Sheet: 12 Growth media
Medium Name	Base	Nutrient(s) Added	Phosphate (mmol)	Silicate (mmol)	Nitrite (mmol)	Nitrite + Nitrate (mmol)	Ammonia (mmol)
ASW + quinoa	artificial seawater	quinoa grains	4.87	< 1	< 0.1	4.32	11.5
OE	artificial seawater	0.21 mg/L proteose peptone, 0.04 mg/L yeast extract	2.05	< 1	< 0.1	3.12	6.52
10% CGM.3	artificial seawater	0.5 g/L cereal grass	11.7	3.61	0.15	5.3	9.02
25% CGM.3	artificial seawater	1.25 g/L cereal grass	28.3	10	0.27	11.2	16.4
10% FCGM.3	filtered water	0.5 g/L cereal grass	n.d.	n.d.	n.d.	n.d.	n.d.
25% FCGM.3	filtered water	1.25 g/L cereal grass	42.3	5.09	0.23	11.3	16.4
