# Supplementary material for: Gene family innovation, conservation and loss on the animal stem lineage
Source: eLife journal article supplement (doi:10.7554/elife.34226), 2018-05-31
Supplement: supp [file elife-34226-supp-v1.zip › elife_poa_e34226_Supplementary_File_13.xlsx]

## Sheet: 13 ML, Bayesian and Dollo
Maximum Likelihood (Mesquite)
Last Common Ancestor of	Gene Families Present	Gene Families Gained on Stem Lineage	Gene Families Lost on Stem Lineage
Eukaryotes	4679.85	-	-
Opisthokonts	4808.61	735.907	607.145
Holozoans	5854.13	1185.65	140.131
Choanozoans	6678.95	931.861	107.037
Choanoflagellates	8220.64	1775.21	233.53
Animals	8012.34	2508.56	1175.17
Bayesian (MrBayes)
Last Common Ancestor of	Gene Families Present	Gene Families Gained on Stem Lineage	Gene Families Lost on Stem Lineage
Eukaryotes	-	-	-
Opisthokonts	25836	-	-
Holozoans	28105	3175	906
Choanozoans	29519	1571	157
Choanoflagellates	31304	3707	1922
Animals	26491	4460	7487
Dollo parsimony (PHYLIP), this study					Dollo parsimony (PHYLIP), Fairclough et al., 2013
Last Common Ancestor of	Gene Families Present	Gene Families Gained on Stem Lineage	Gene Families Lost on Stem Lineage		Last Common Ancestor of	Gene Families Present	Gene Families Gained on Stem Lineage	Gene Families Lost on Stem Lineage
Eukaryotes	13318	-	-		Eukaryotes	-	-	-
Opisthokonts	14395	1017	319		Opisthokonts	10120	-	-
Holozoans	15221	614	328		Holozoans	-	-	-
Choanozoans	19579	4517	159		Choanozoans	9755	760	1125
Choanoflagellates	21578	4349	2350		Choanoflagellates	6707	574	3622
Animals	17109	2207	4677		Animals	10272	1235	718
