# Supplementary material for: Gene family innovation, conservation and loss on the animal stem lineage
Source: eLife journal article supplement (doi:10.7554/elife.34226), 2018-05-31
Supplement: supp [file elife-34226-supp-v1.zip › elife_poa_e34226_Supplementary_File_14.xlsx]

## Sheet: 14 Animal TLR-NFkB pathway
Gene	Function	Role (UniProt)	Pfam Domain Architecture	Pfam Domain Architecture Phylogenetic Distribution	UniProt ID (Mouse)	GenBank ID(s) (Mouse)	Gene Family Containing Mouse Protein	Gene Family Phylogenetic Distribution	Notes on Gene Family Phylogenetic Distribution
MyD88	Protein binding	Acts via IRAK1, IRAK2, IRF7 and TRAF6, leading to NF-kappa-B activation	Death~TIR	Animals	MYD88_MOUSE	6754772	9784	Animals
IRAK1	Kinase	Association with MYD88 leads to IRAK1 phosphorylation by IRAK4 and subsequent autophosphorylation and kinase activation	Death~Pkinase	Animals	IRAK1_MOUSE	295789115,117606337,295789111,295789117,295789139	11	Eukaryotes	845 proteins in gene family, mix of kinases
IRAK4	Kinase	Phosphorylates initially IRAK1, thus stimulating the kinase activity and intensive autophosphorylation of IRAK1	Death~Pkinase	Animals	IRAK4_MOUSE	23943898	11	Eukaryotes	Same gene family as IRAK1
TRAF6	Ubiquitin ligase	Forms a complex with PELI1, IRAK1, IRAK4 and MYD88; this complex recruits MAP3K7/TAK1, TAB1 and TAB2 to mediate NF-kappa-B activation	zf-C3HC4~zf-TRAF	Amorphea (= Amoebozoa + Opisthokonts)	TRAF6_MOUSE	38348246	5803	Animals + B. natans	B. natans blastp to animal TRAF in NCBI nr database
TAK1 (MAP3K7)	Kinase	Mediates signal transduction of TRAF6	Pkinase_Tyr	Eukaryotes	M3K7_MOUSE	27881429	7287	Eukaryotes	S. dolichothecata blastp to MAPKKK 20/MLT, G. theta and B. natans blastp to TKL protein kinases
TAB1	Protein binding	Interacts with TRAF6 and MAP3K7	PP2C	Eukaryotes	TAB1_MOUSE	34328268	6773	Choanozoa	2 choanos in gene family: S. urceolata blastp to cnidarian Tab1, S. kvevrii blastp to eukaryotic phosphatases
TAB2	Protein binding	Adapter linking MAP3K7/TAK1 and TRAF6	CUE or CUE~zf-RANBP	Eukaryotes or fish	TAB2_MOUSE	20149752	63150	Olfactores (= vertebrates + tunicates)
IKK-beta	Kinase	Acts as part of the canonical IKK complex in the conventional pathway of NF-kappa-B activation and phosphorylates inhibitors of NF-kappa-B on 2 critical serine residues	Pkinase~IKKbetaNEMObind	Vertebrates	IKKB_MOUSE	229576825,33469101	9189	Animals
IKK-gamma	Protein binding	Regulatory subunit of the IKK core complex which phosphorylates inhibitors of NF-kappa-B thus leading to the dissociation of the inhibitor/NF-kappa-B complex and ultimately the degradation of the inhibitor	CC2-LZ~NEMO	Bilateria	NEMO_MOUSE	209862941,238637310,238637312,238637307,238637314,30519887,238637316	21843	Vertebrates
IkB alpha (NFKBIA)	Protein binding	Inhibits the activity of dimeric NF-kappa-B/REL complexes by trapping REL dimers in the cytoplasm through masking of their nuclear localization signals	Ank~Ank_2	Eukaryotes	IKBA_MOUSE	226052096	7833	Eukaryotes	C. hollandica blastp to non-canonical NfkB subunit p105, B. natans blastp to Ank proteins
