# Supplementary figures and images for: Gene family innovation, conservation and loss on the animal stem lineage
Source: eLife journal article supplement (doi:10.7554/elife.34226), 2018-05-31

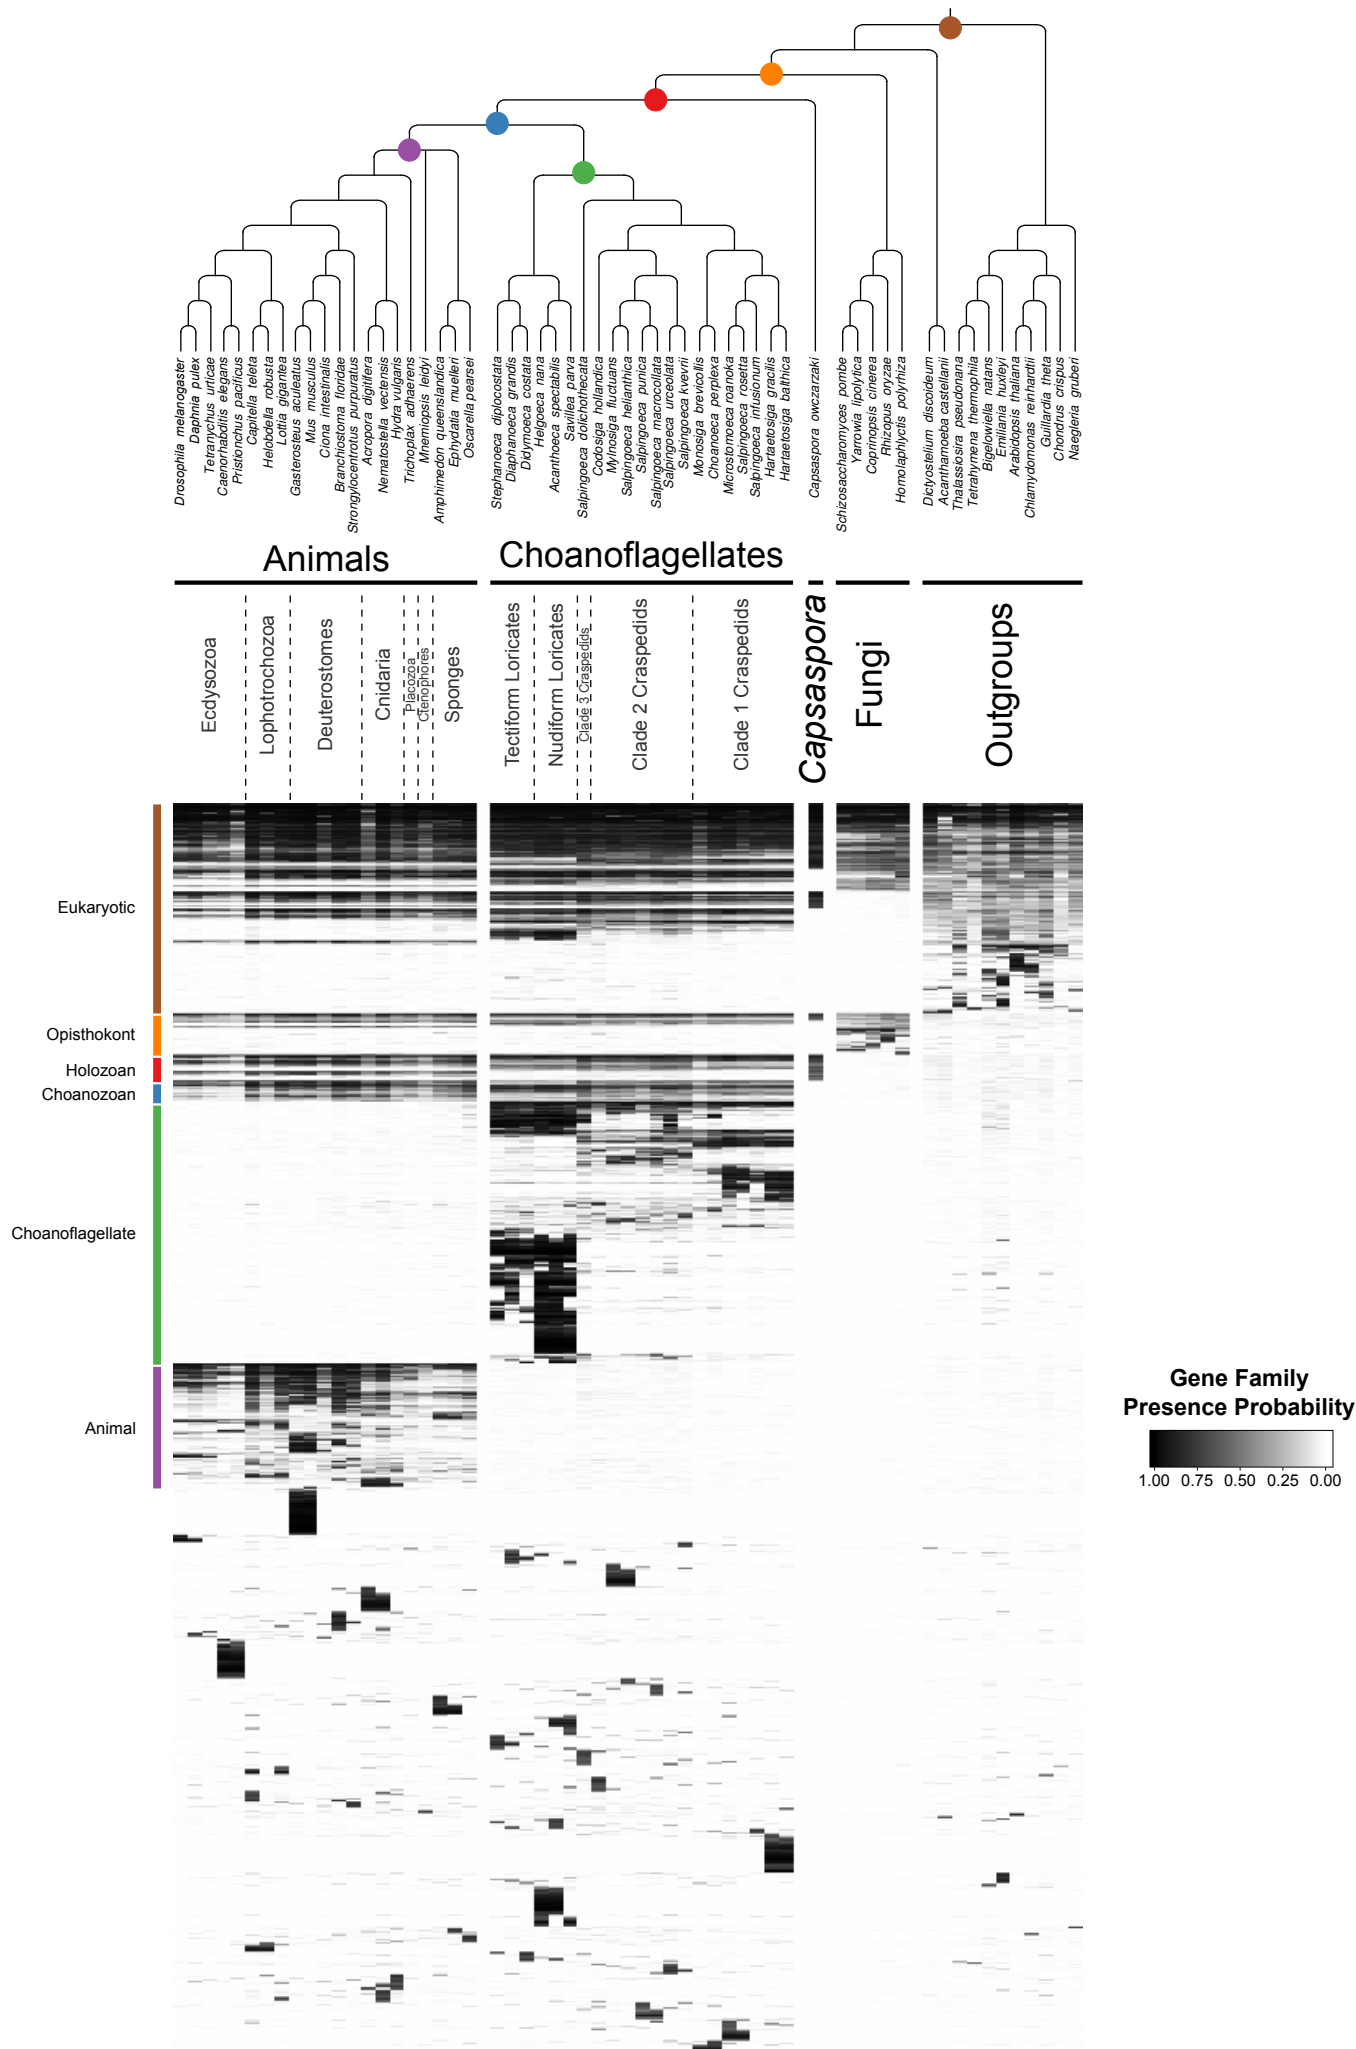

Supplement: supp [file elife-34226-supp-v1.zip › elife_poa_e34226_Figure_2_figure_supplement_4.pdf]

**C**

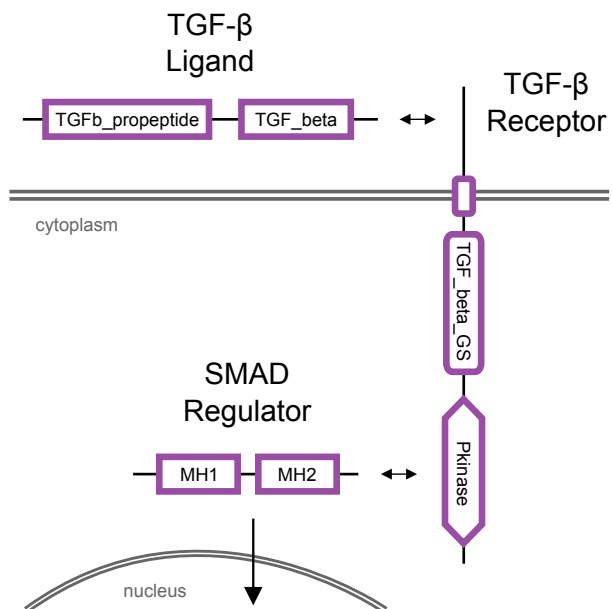

**b**

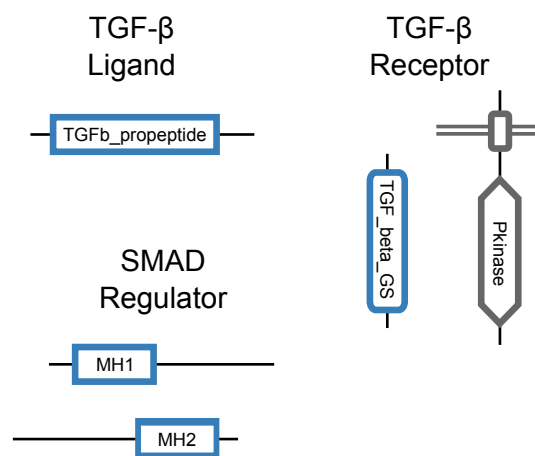

**C**

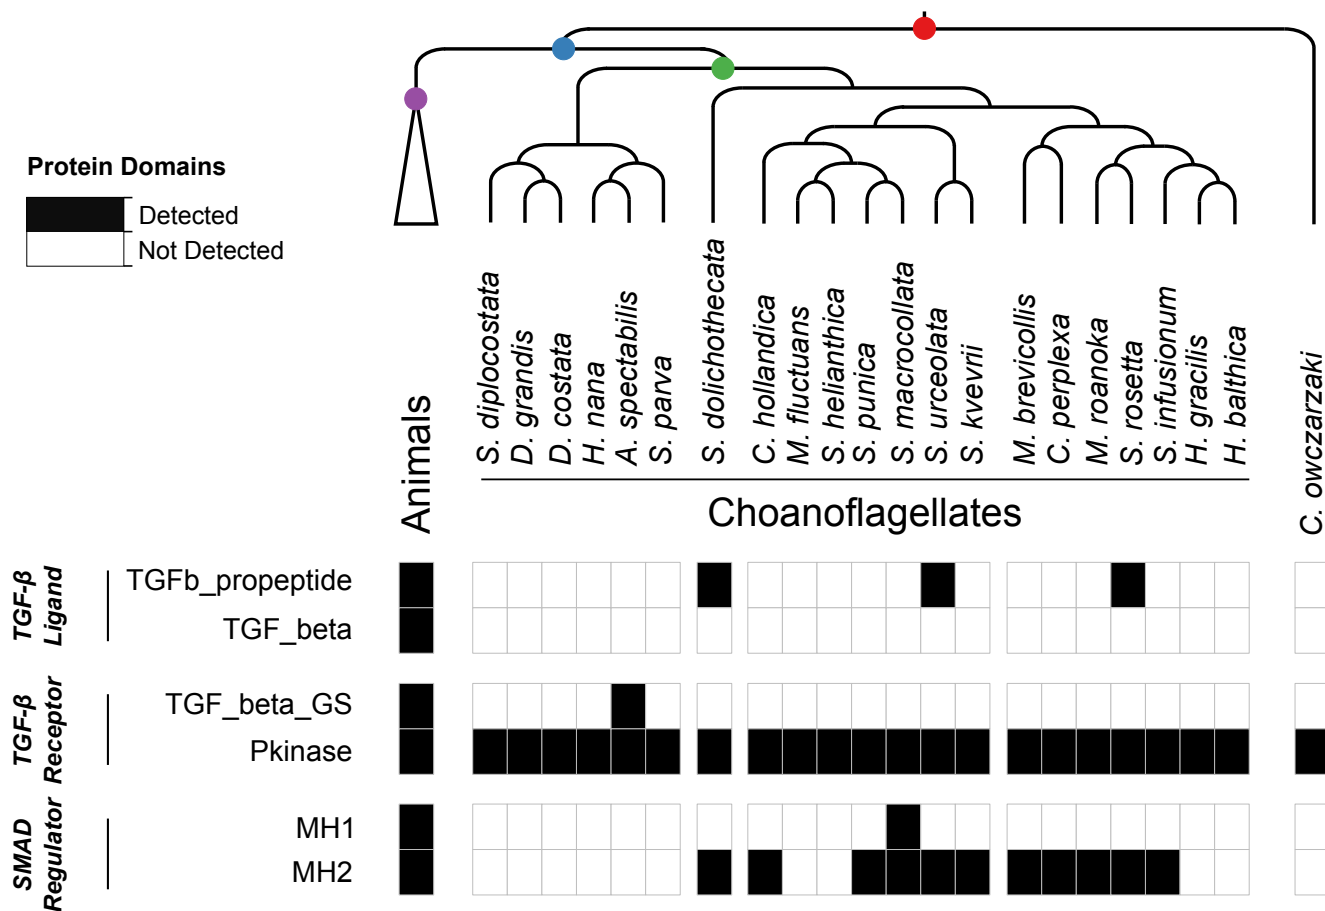

Supplement: supp [file elife-34226-supp-v1.zip › elife_poa_e34226_Figure_2_figure_supplement_9.pdf]

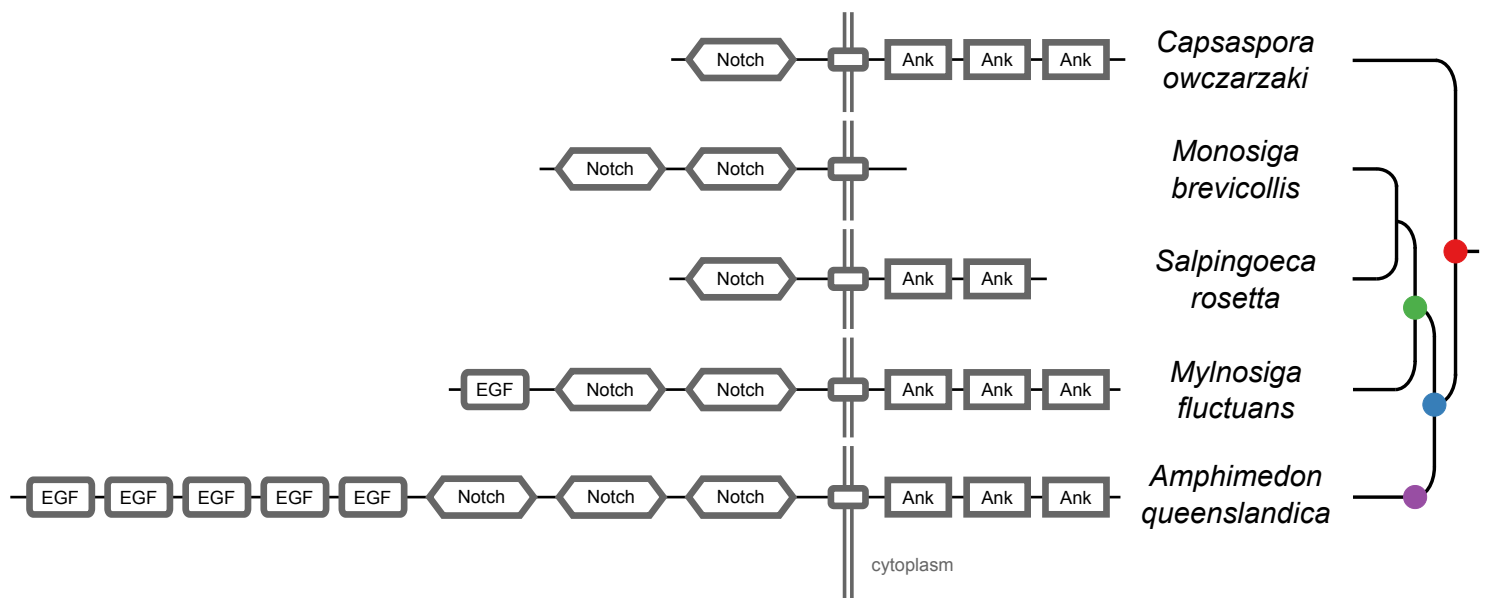

Supplement: supp [file elife-34226-supp-v1.zip › elife_poa_e34226_Figure_2_figure_supplement_8.pdf]

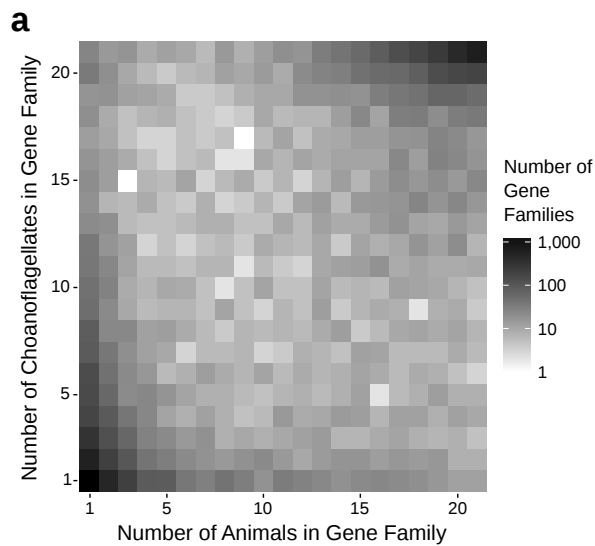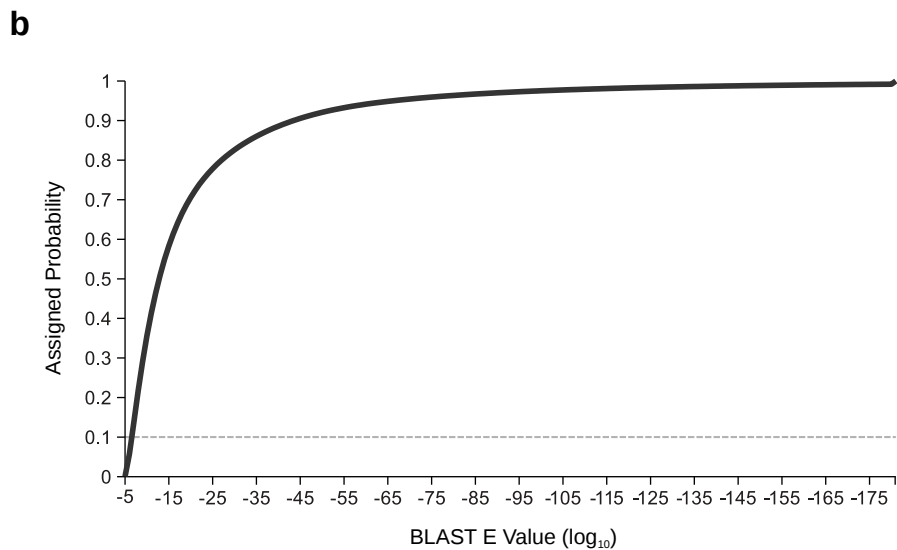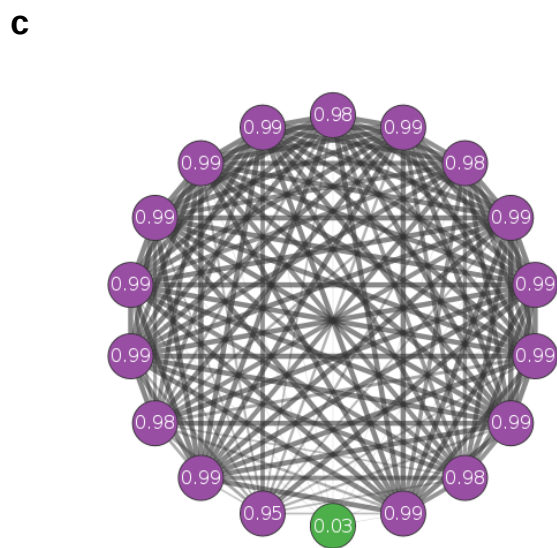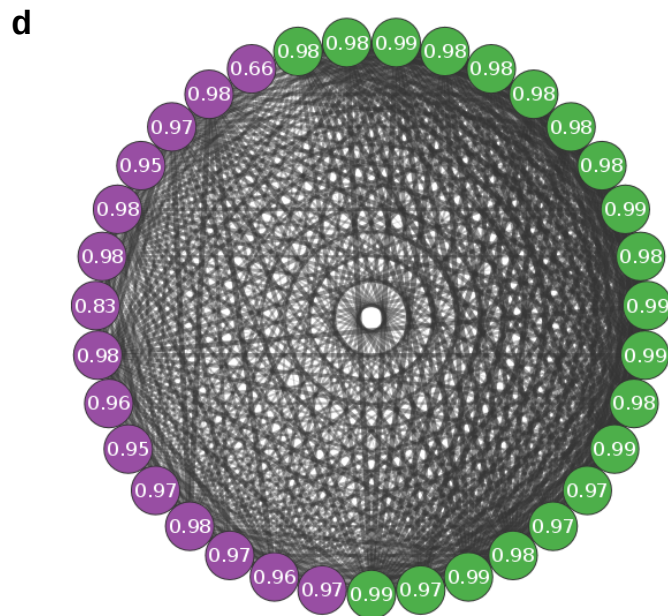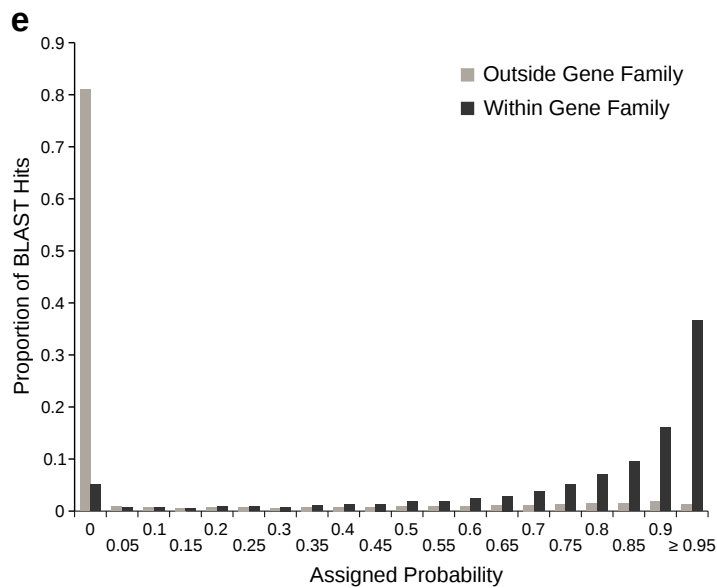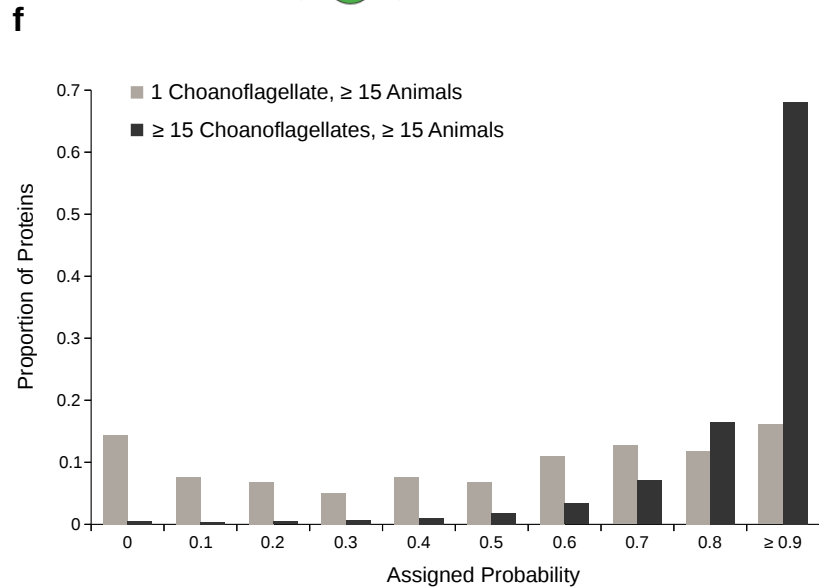

Supplement: supp [file elife-34226-supp-v1.zip › elife_poa_e34226_Figure_2_figure_supplement_2.pdf]

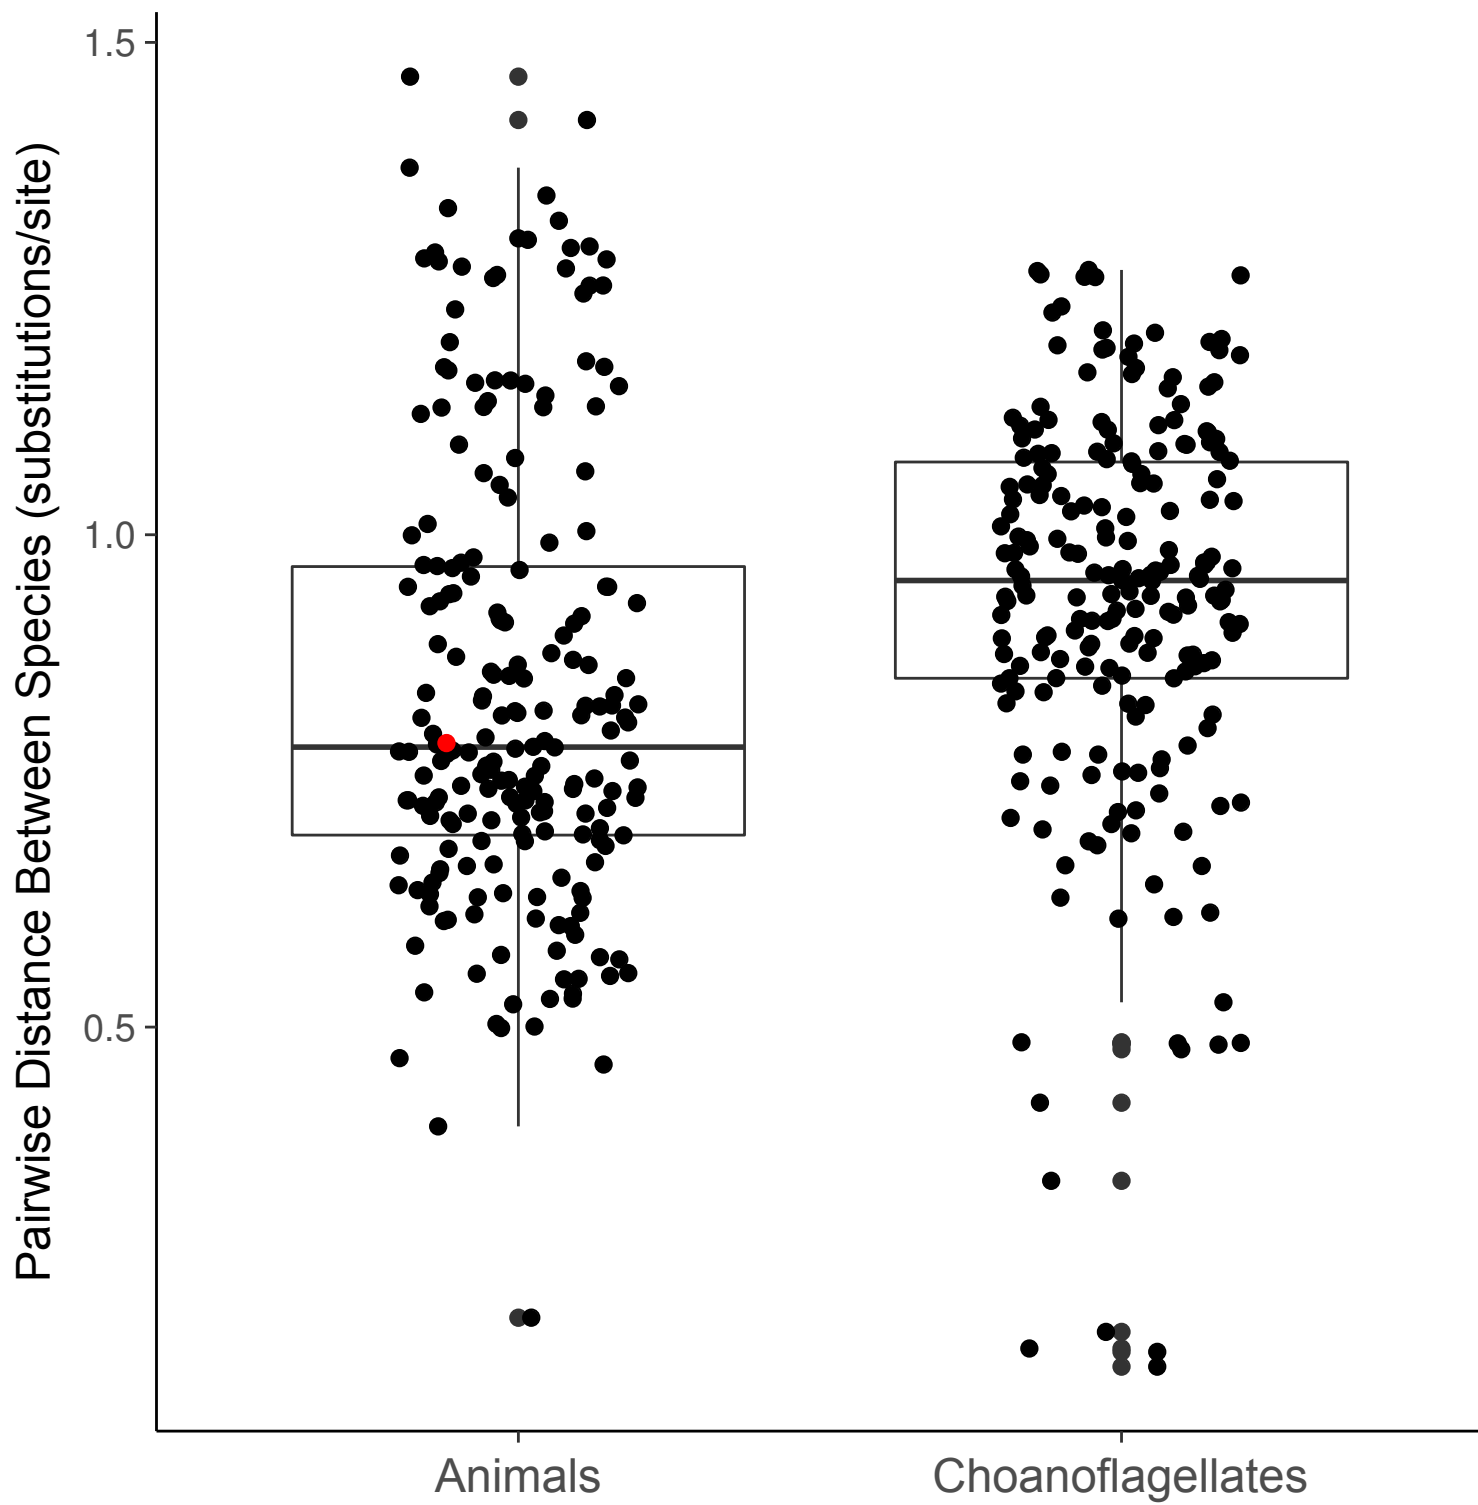

Supplement: supp [file elife-34226-supp-v1.zip › elife_poa_e34226_Figure_2_figure_supplement_1.pdf]

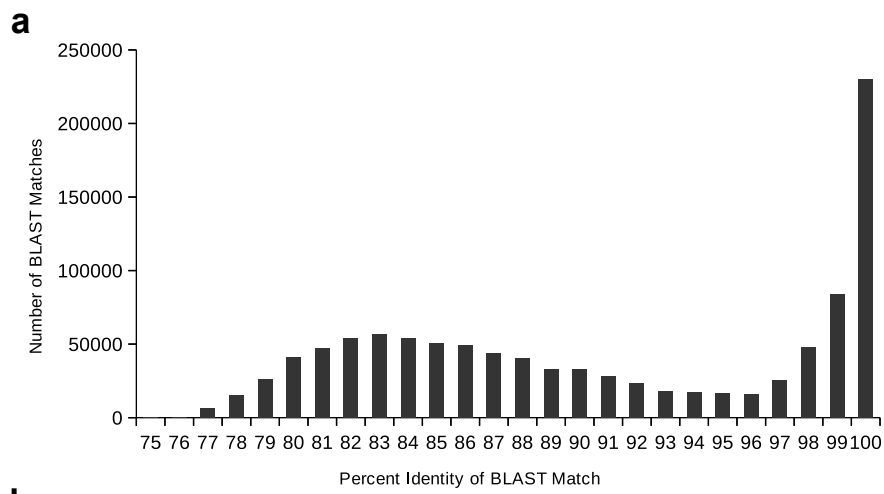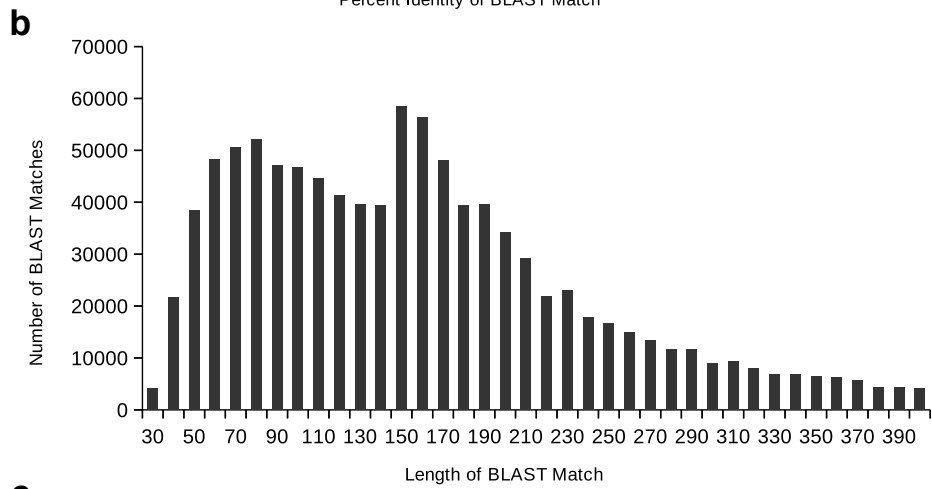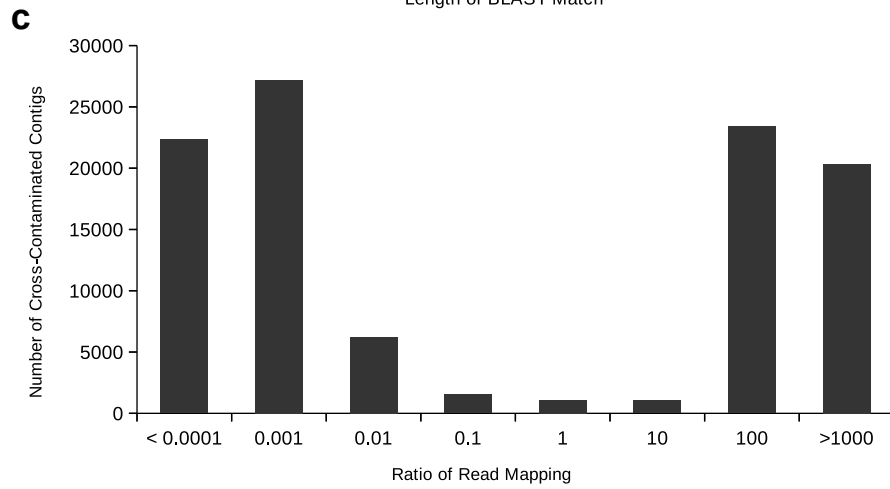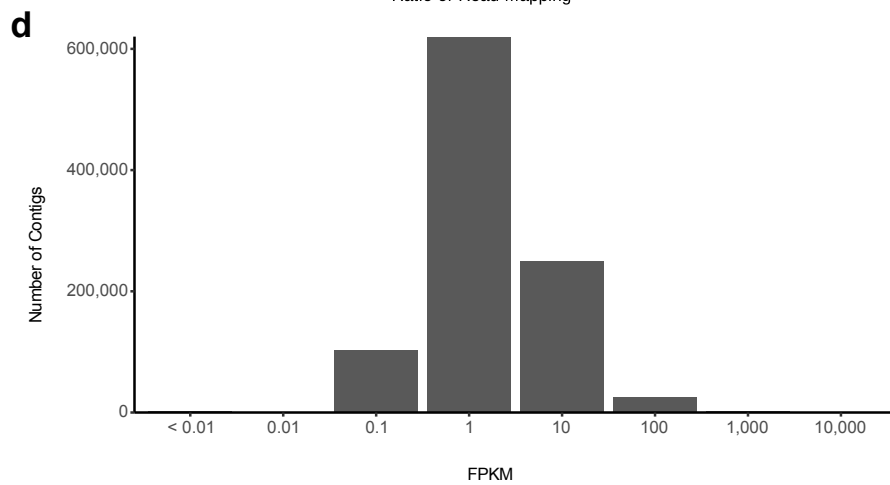

Supplement: supp [file elife-34226-supp-v1.zip › elife_poa_e34226_Figure_1_figure_supplement_3.pdf]

Gene Family Origin

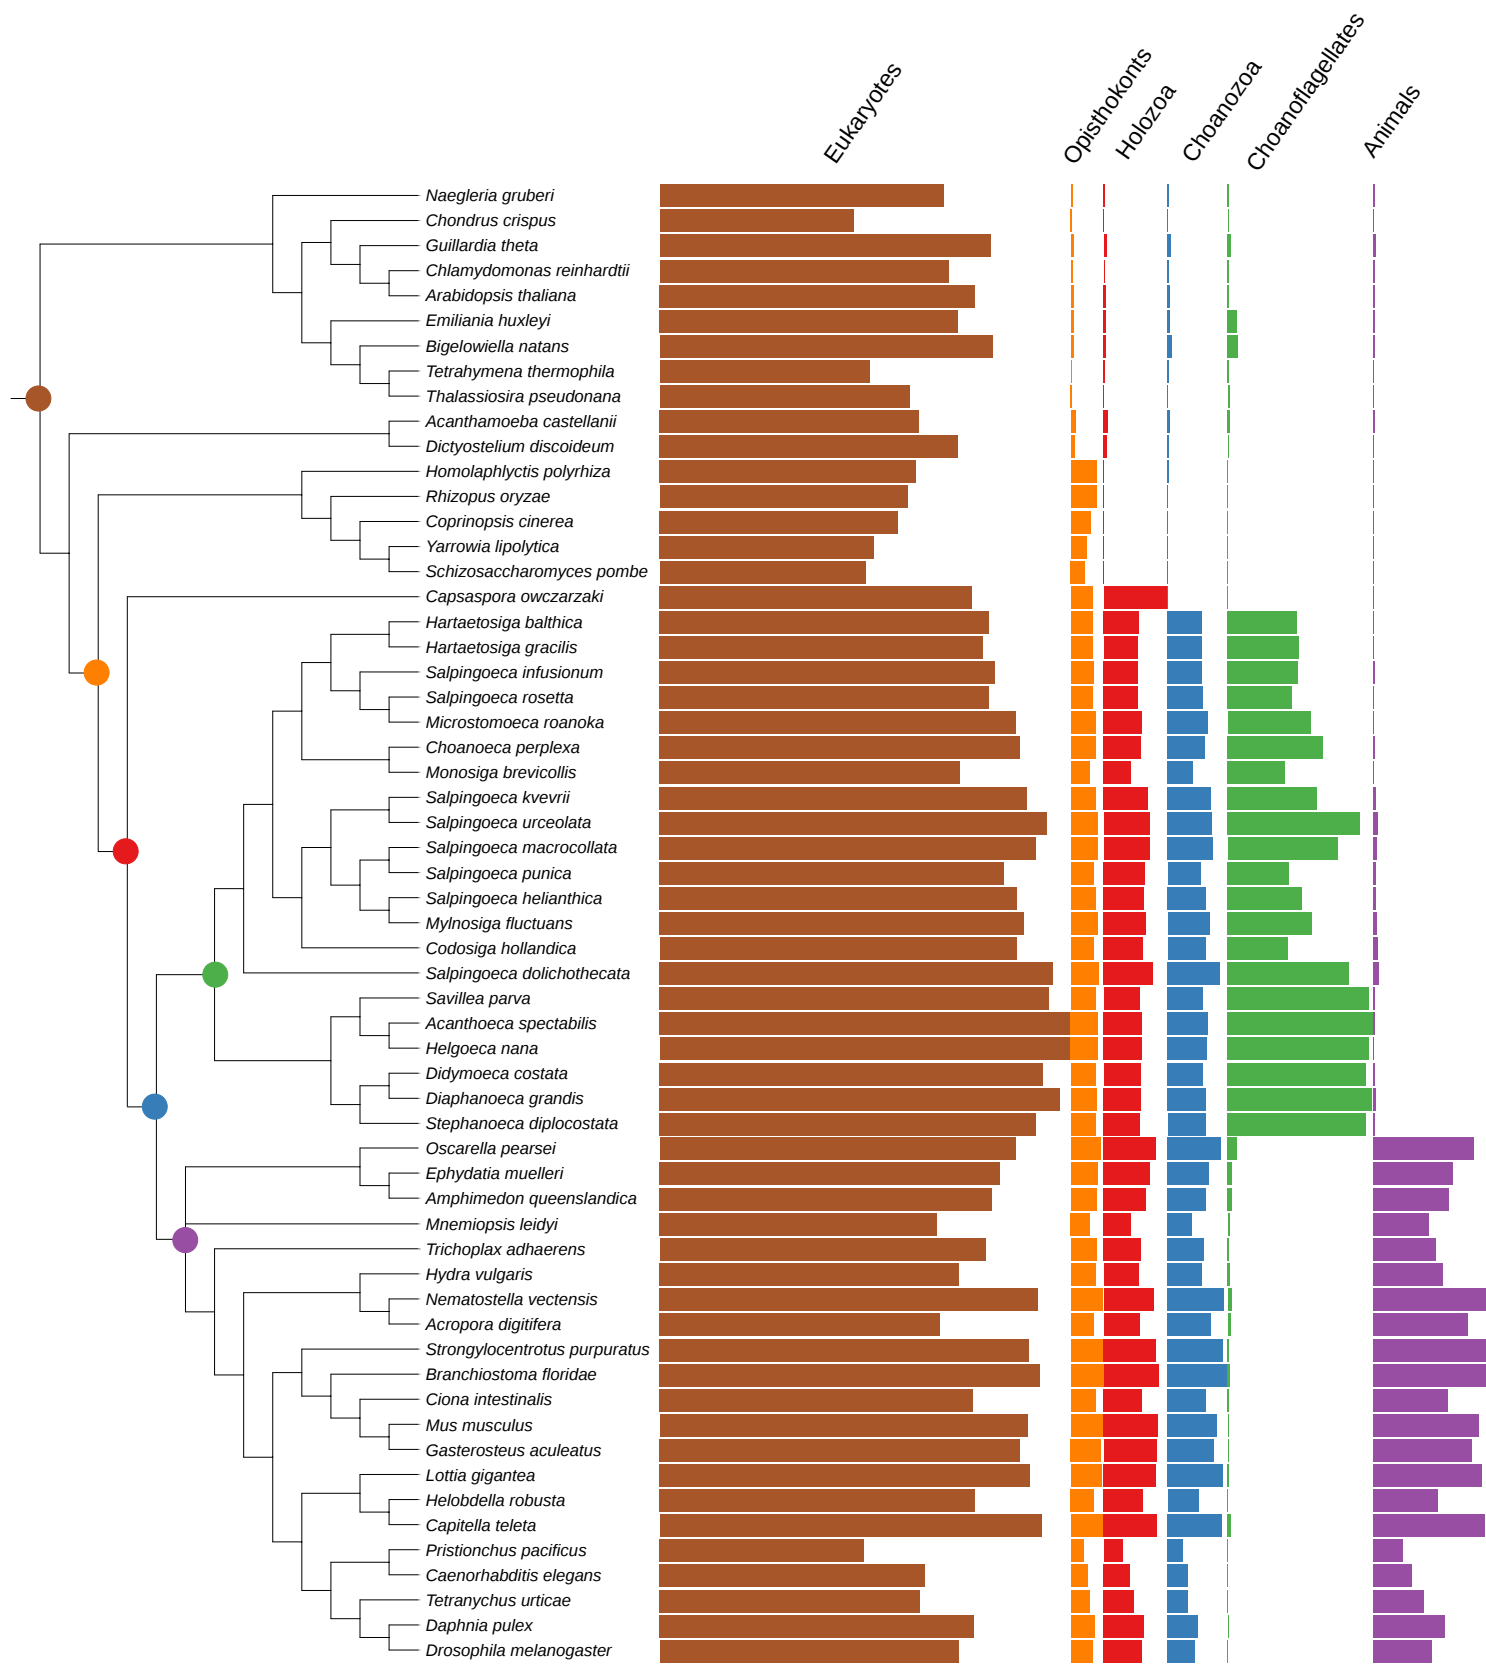

Supplement: supp [file elife-34226-supp-v1.zip › elife_poa_e34226_Figure_3_figure_supplement_1.pdf]

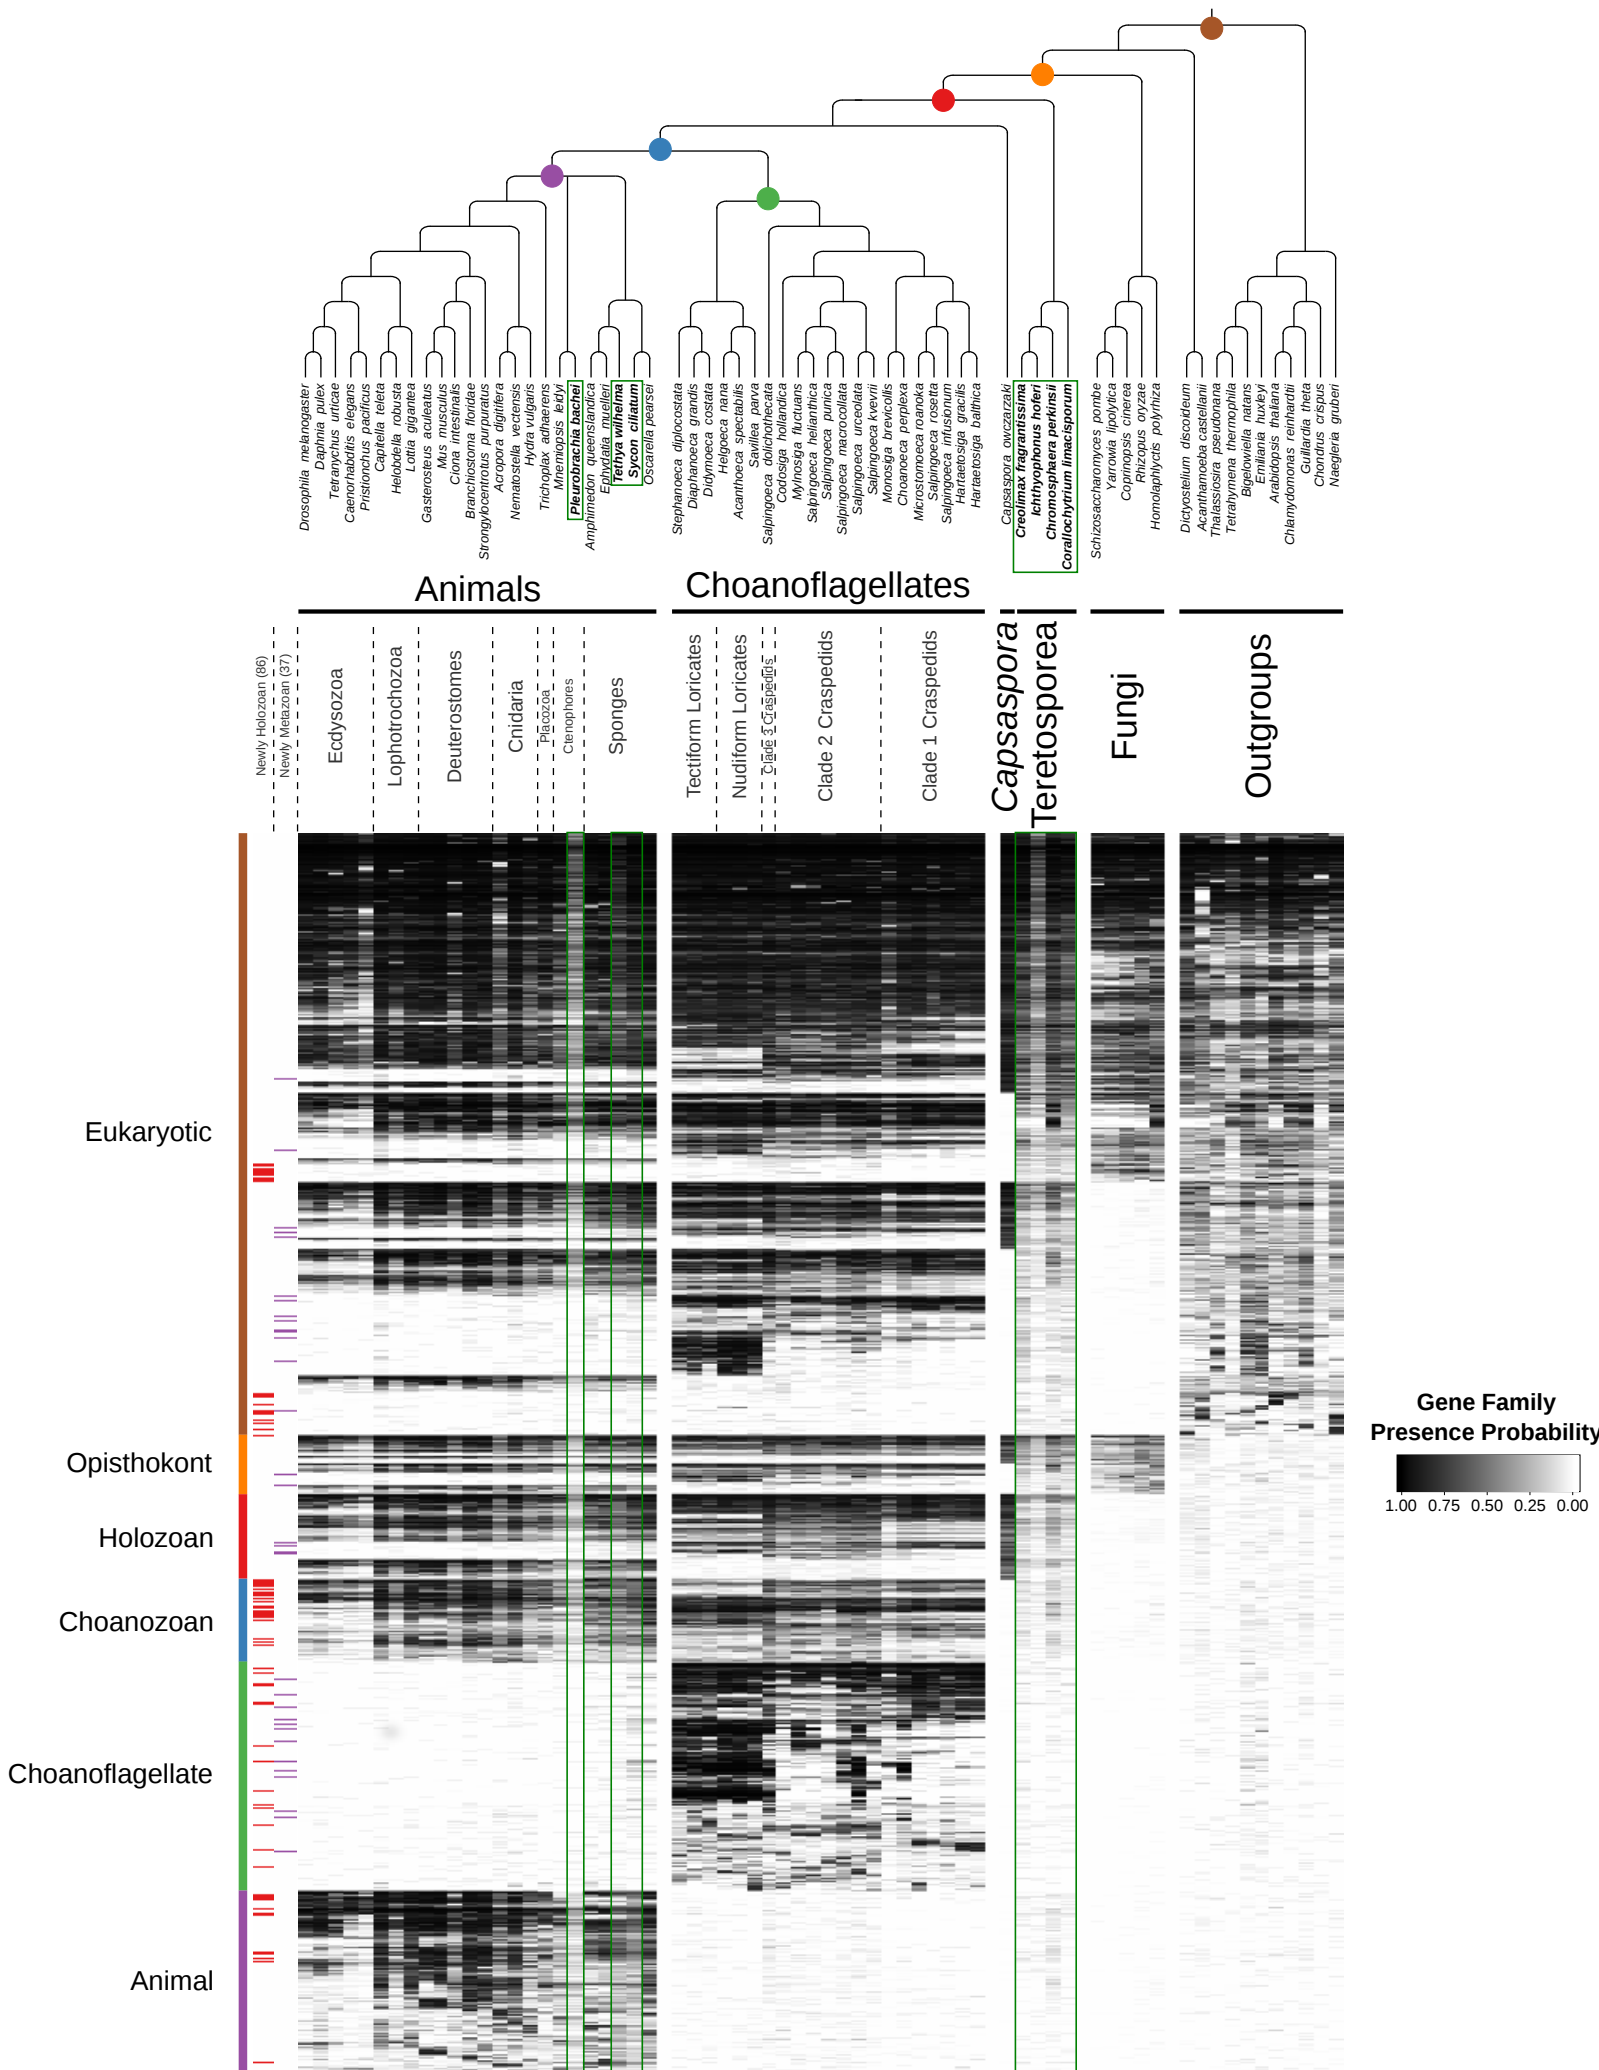

Supplement: supp [file elife-34226-supp-v1.zip › elife_poa_e34226_Figure_2_figure_supplement_5.pdf]

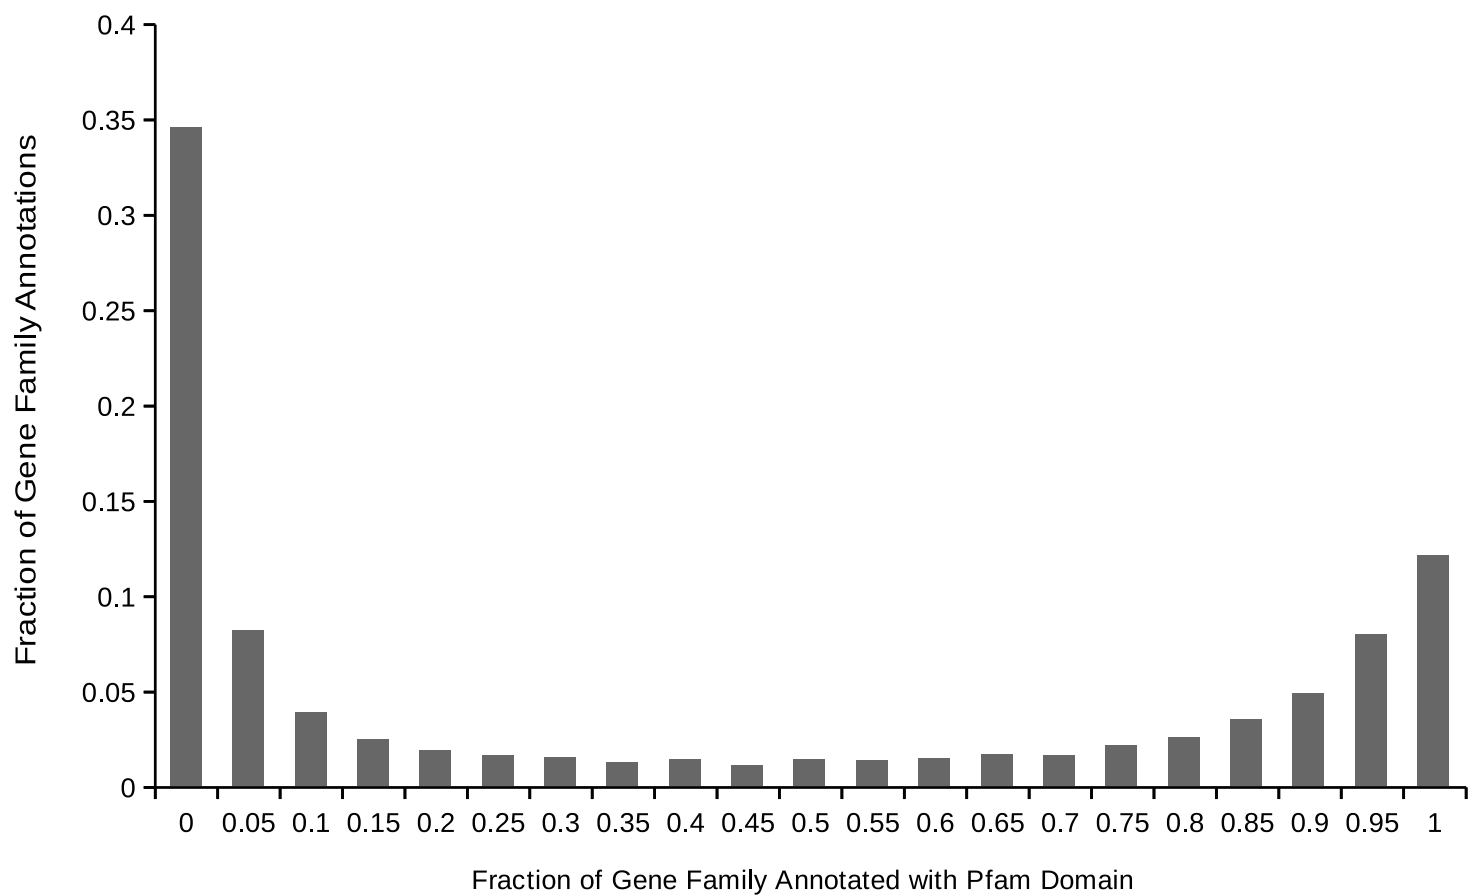

Supplement: supp [file elife-34226-supp-v1.zip › elife_poa_e34226_Figure_2_figure_supplement_11.pdf]

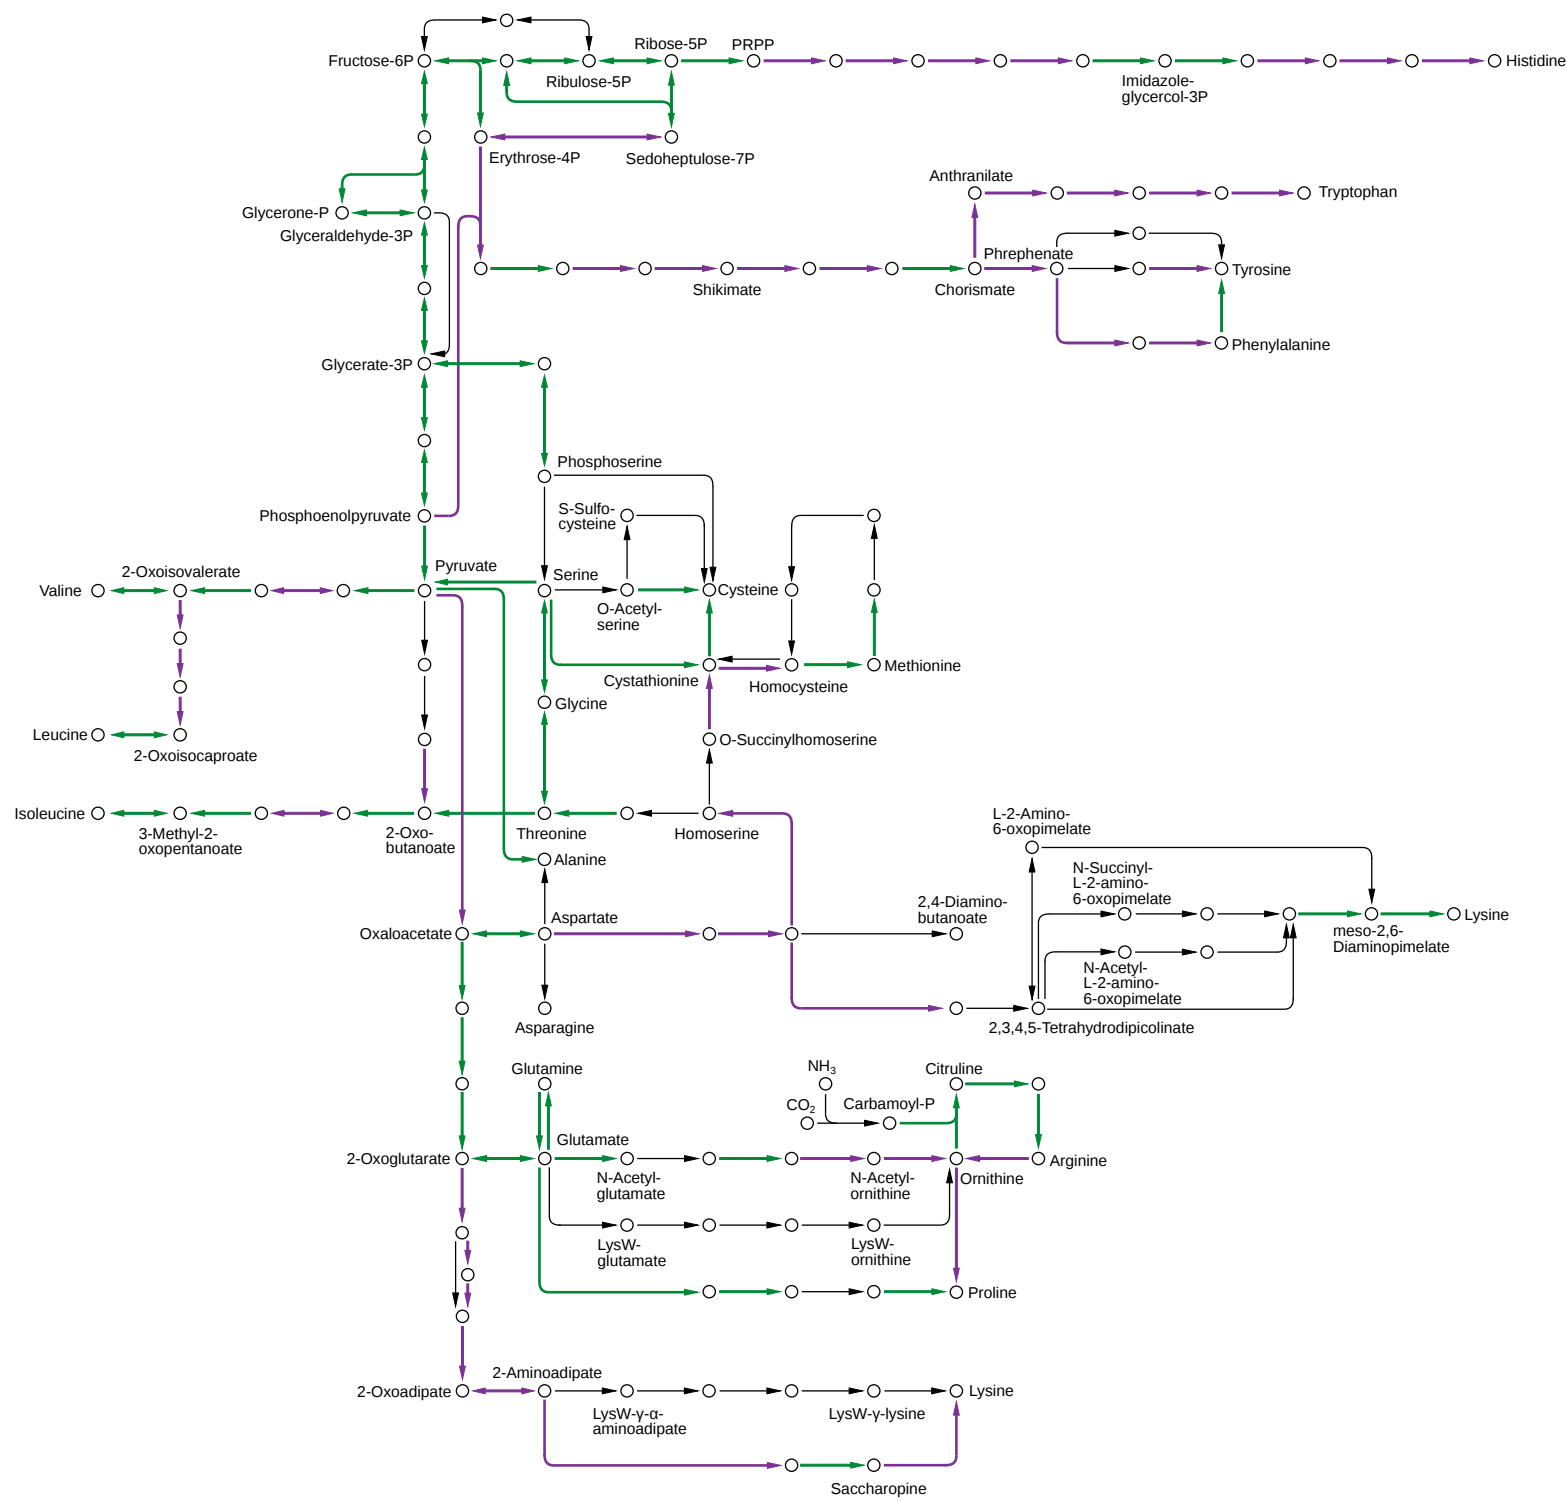

Supplement: supp [file elife-34226-supp-v1.zip › elife_poa_e34226_Figure_2_figure_supplement_7.pdf]

**a**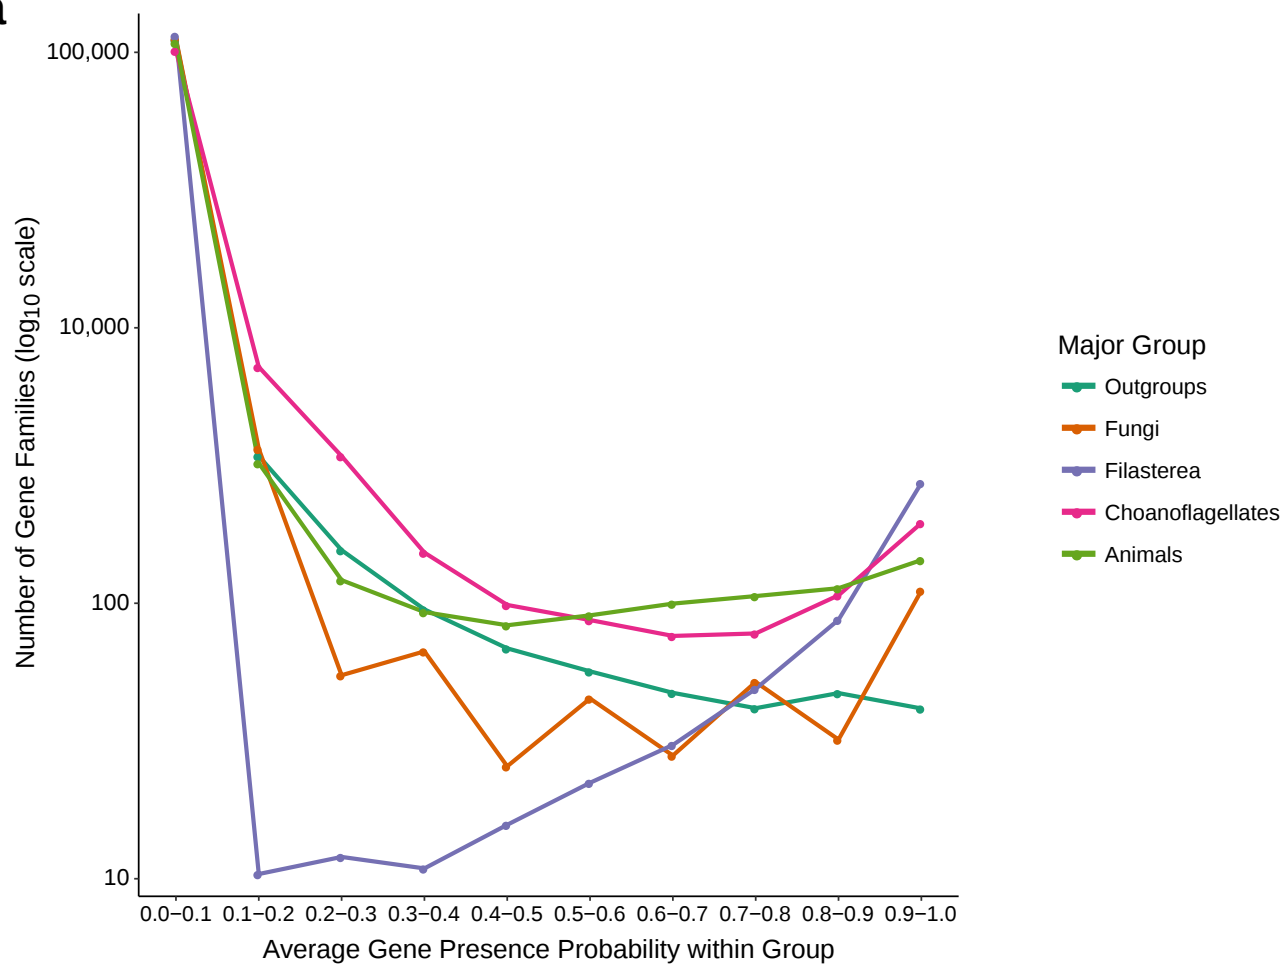**b**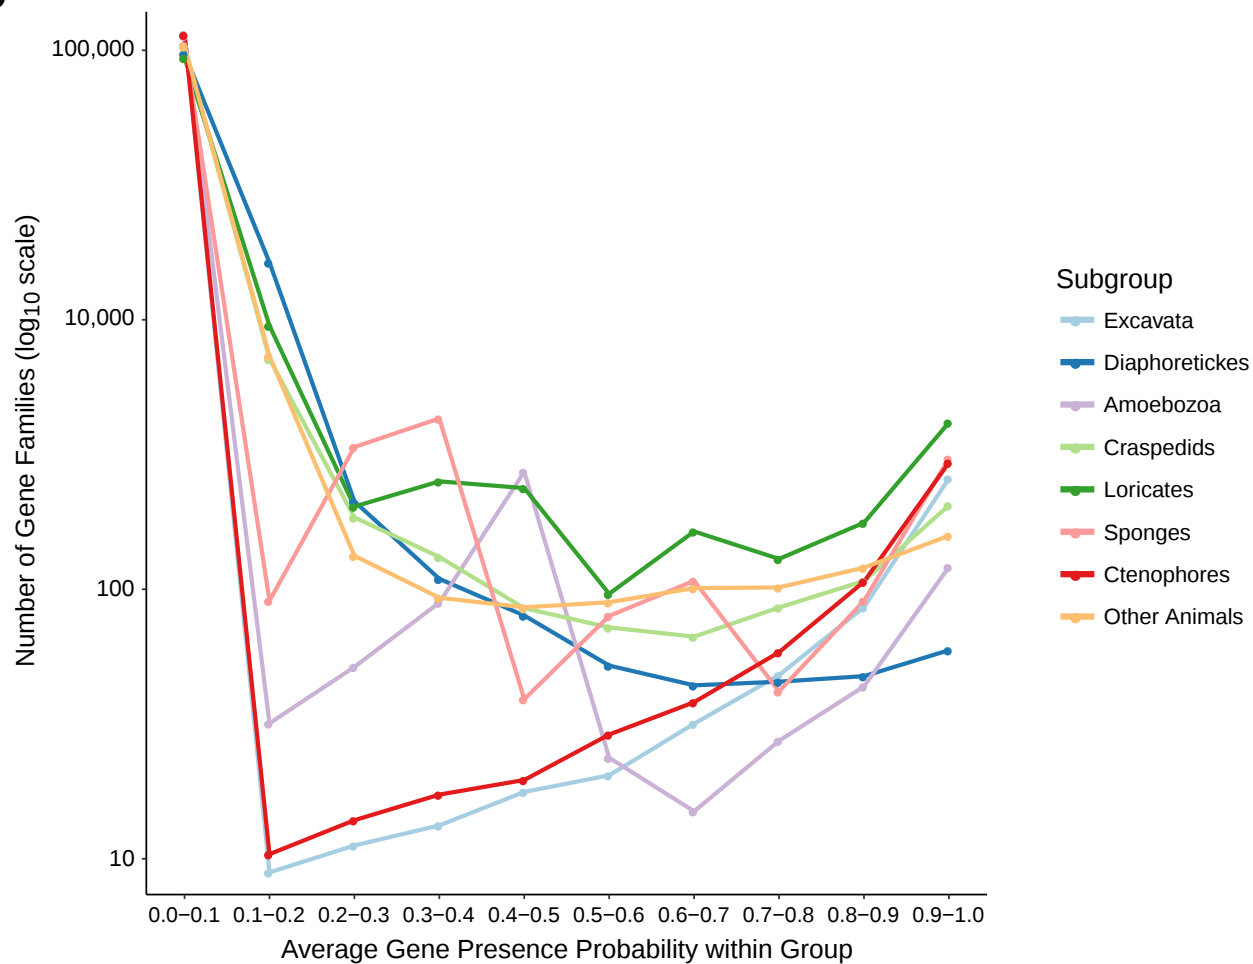

Supplement: supp [file elife-34226-supp-v1.zip › elife_poa_e34226_Figure_2_figure_supplement_3.pdf]

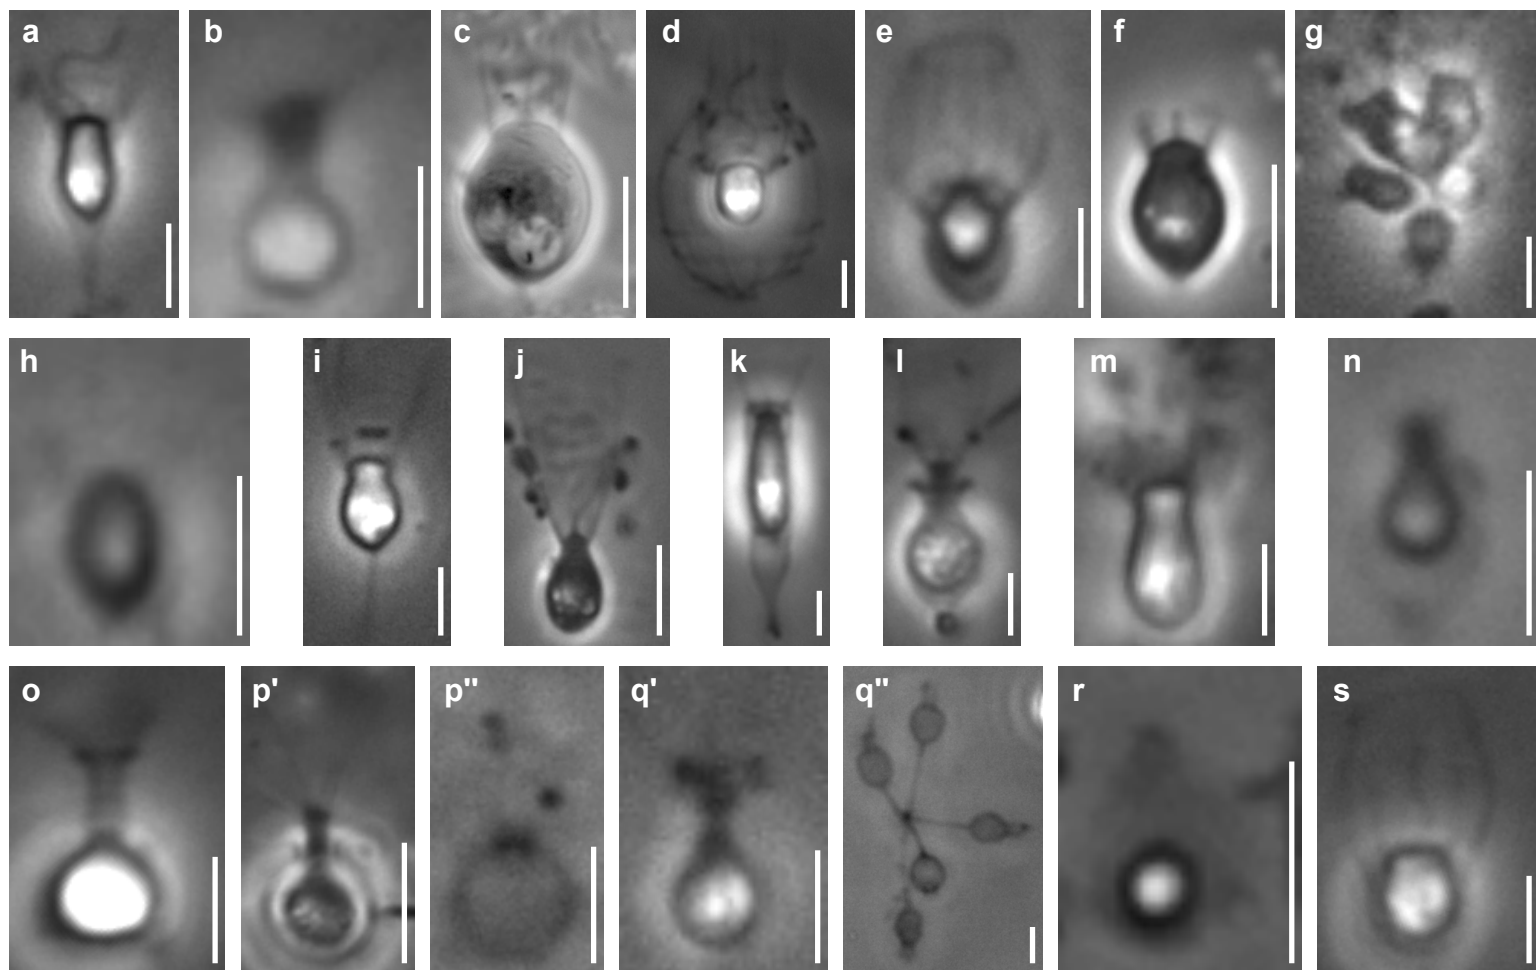

Supplement: supp [file elife-34226-supp-v1.zip › elife_poa_e34226_Figure_1_figure_supplement_1.pdf]

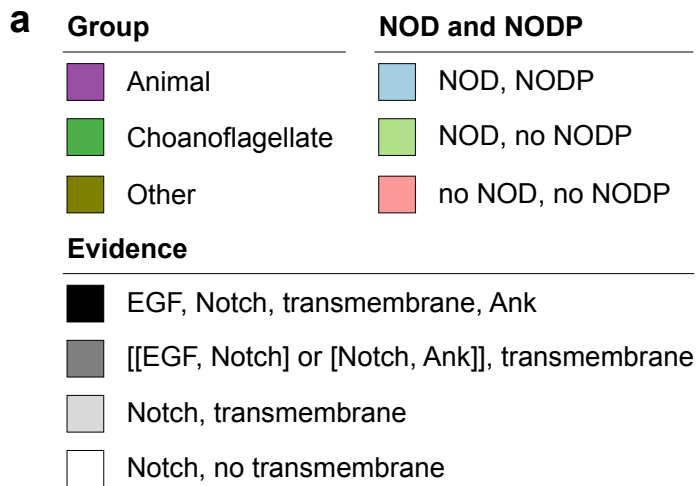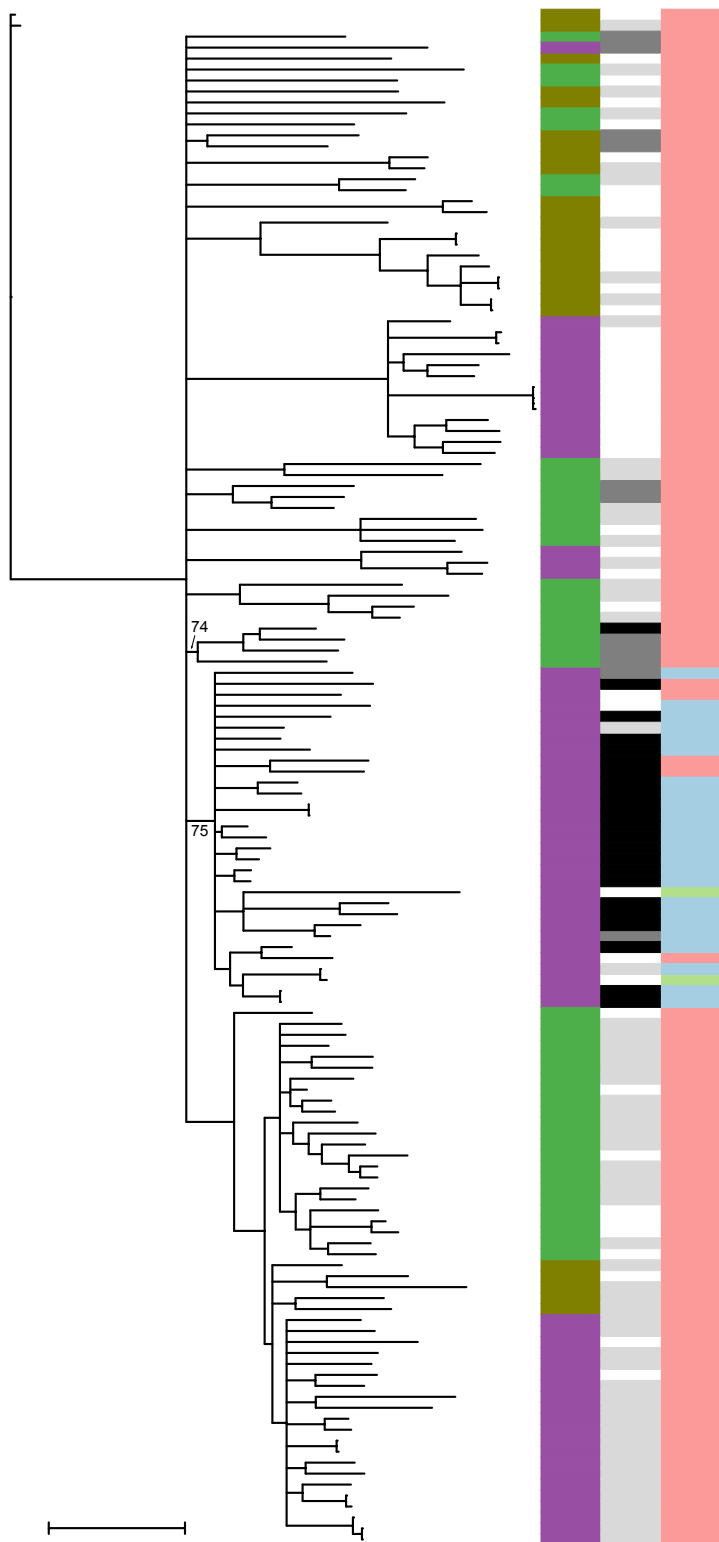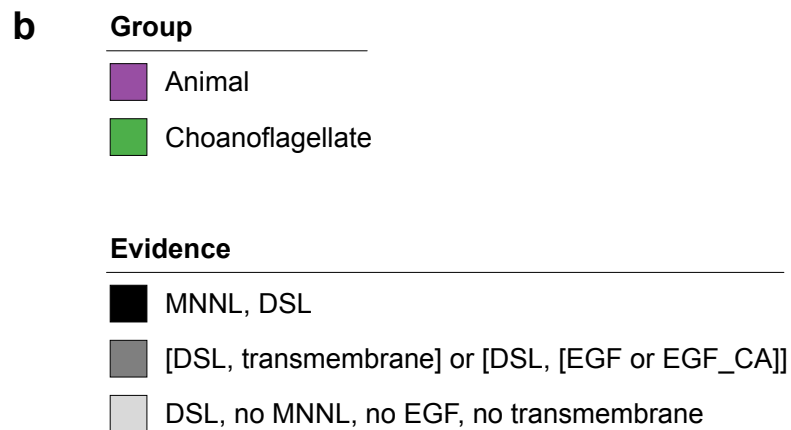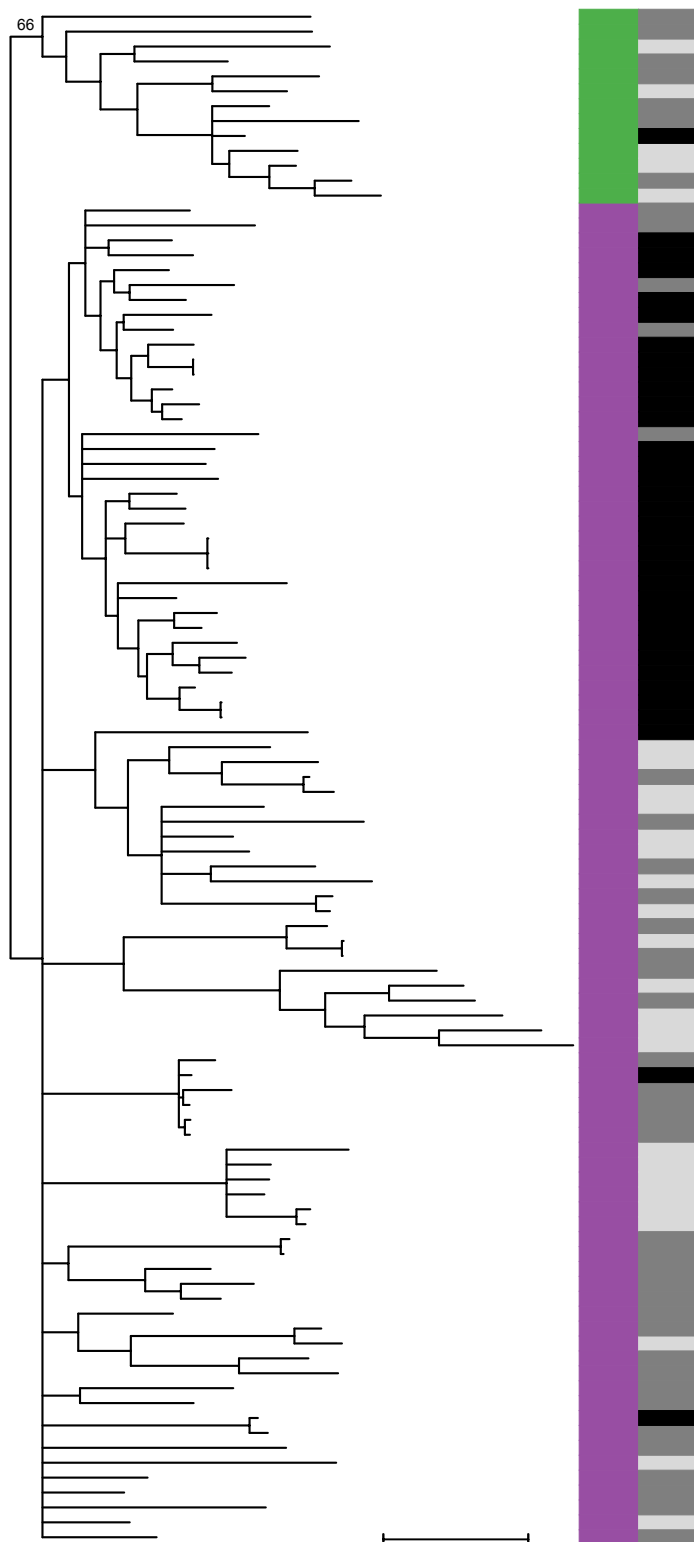

Supplement: supp [file elife-34226-supp-v1.zip › elife_poa_e34226_Figure_2_figure_supplement_12.pdf]

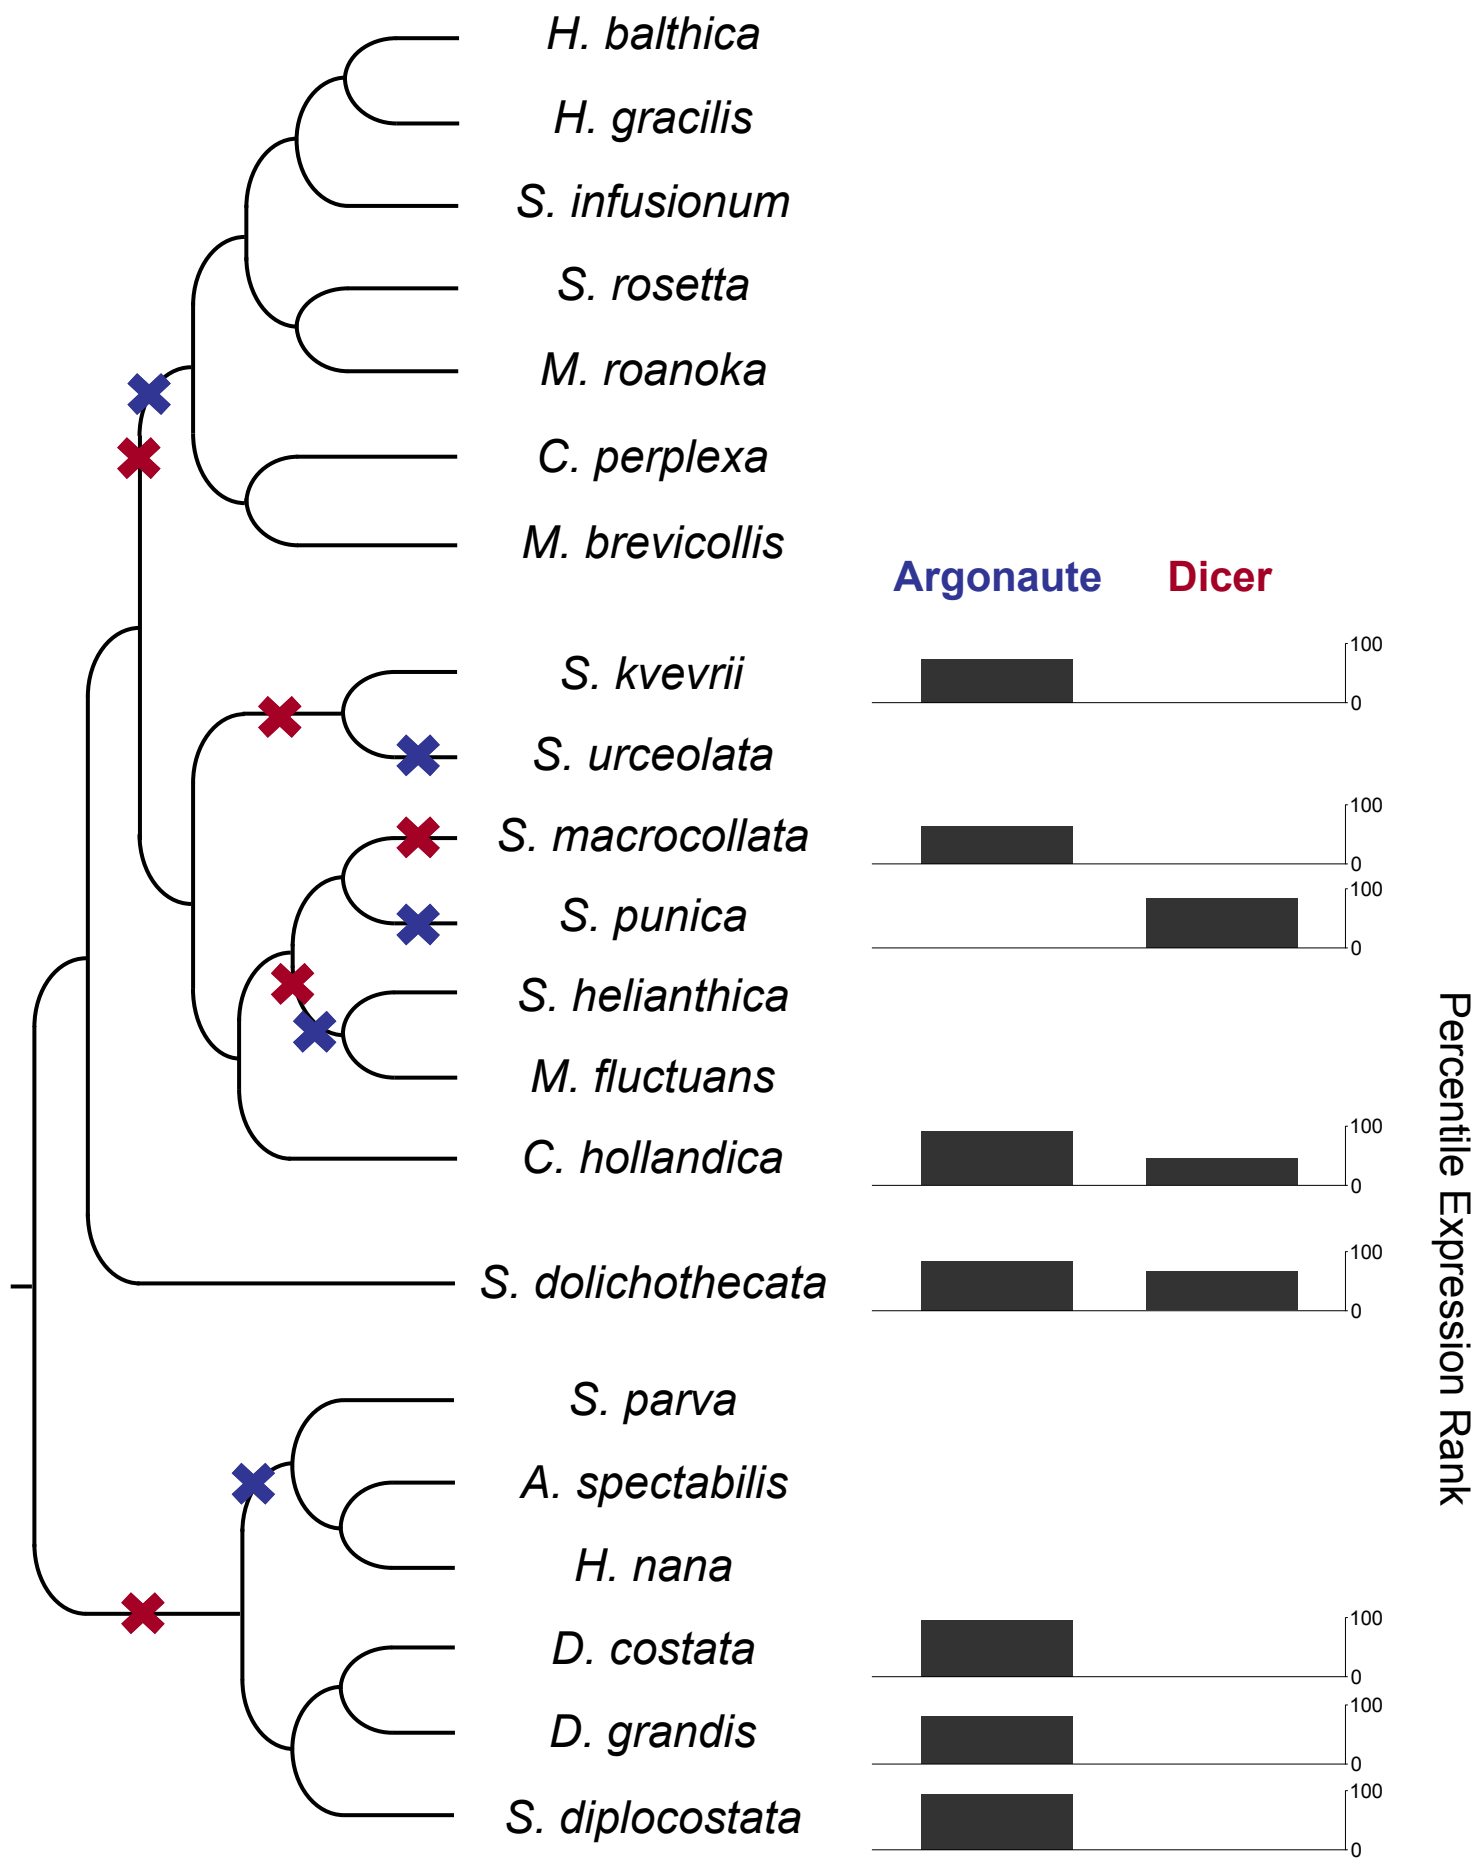

Supplement: supp [file elife-34226-supp-v1.zip › elife_poa_e34226_Figure_3_figure_supplement_2.pdf]

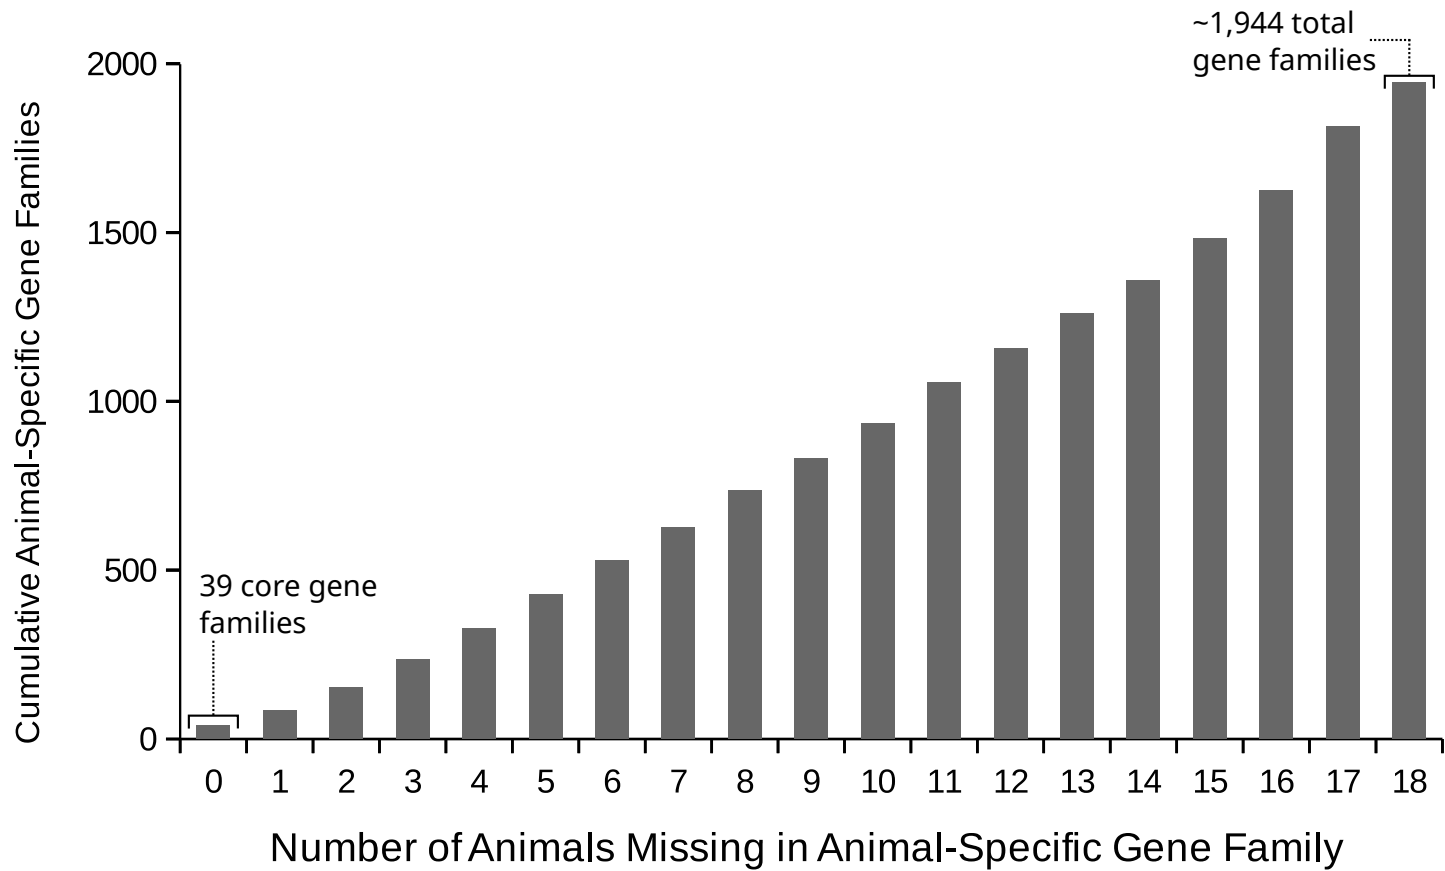

Supplement: supp [file elife-34226-supp-v1.zip › elife_poa_e34226_Figure_3_figure_supplement_3.pdf]

**a**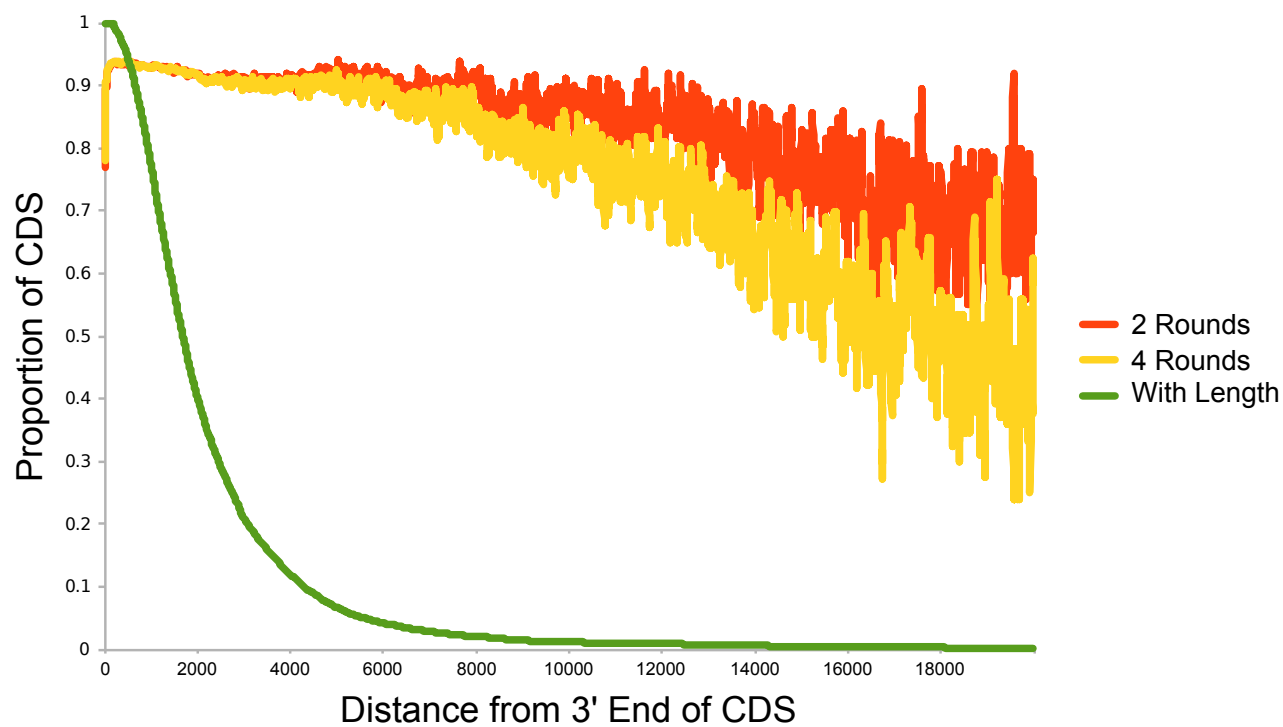**b**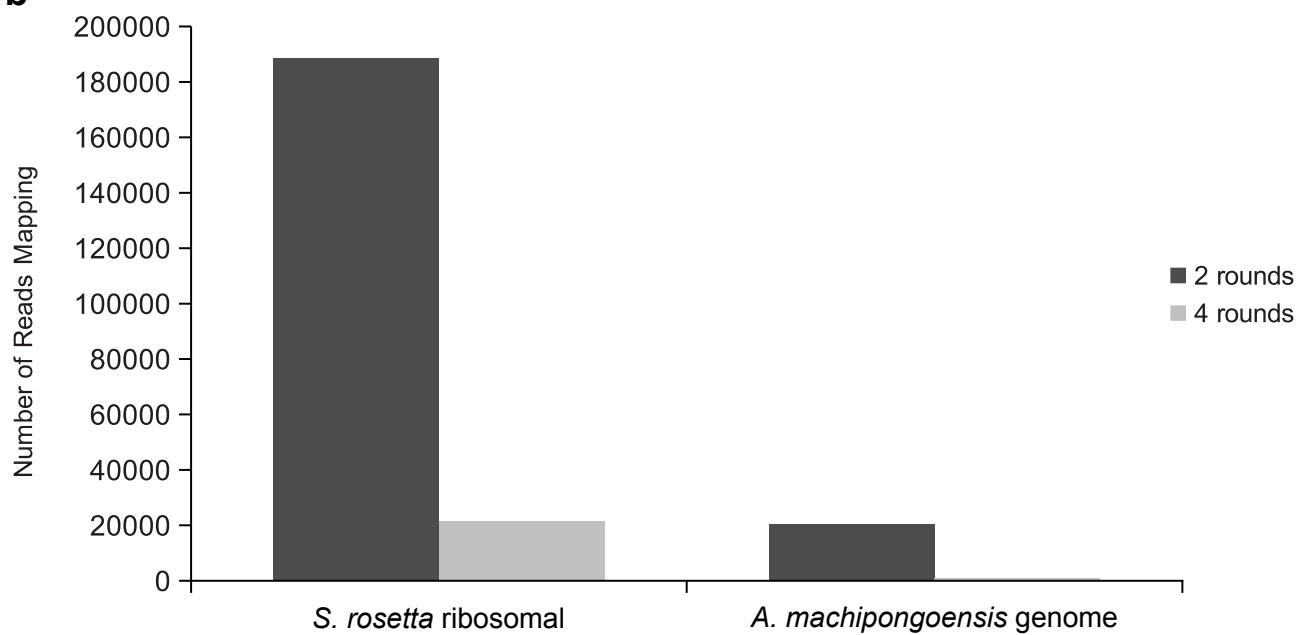

Supplement: supp [file elife-34226-supp-v1.zip › elife_poa_e34226_Figure_1_figure_supplement_2.pdf]
